# Supplementary material
Source: Copernicus journal article supplement (doi:10.5194/egusphere-2026-401)

k1\_m31.018

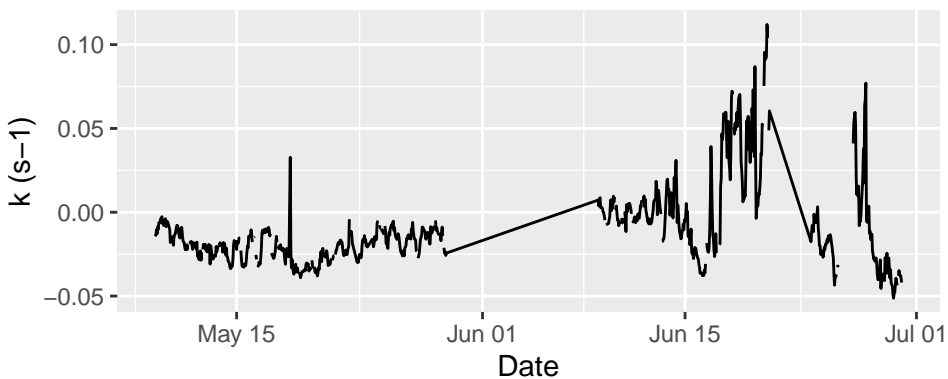

k1\_m33.033

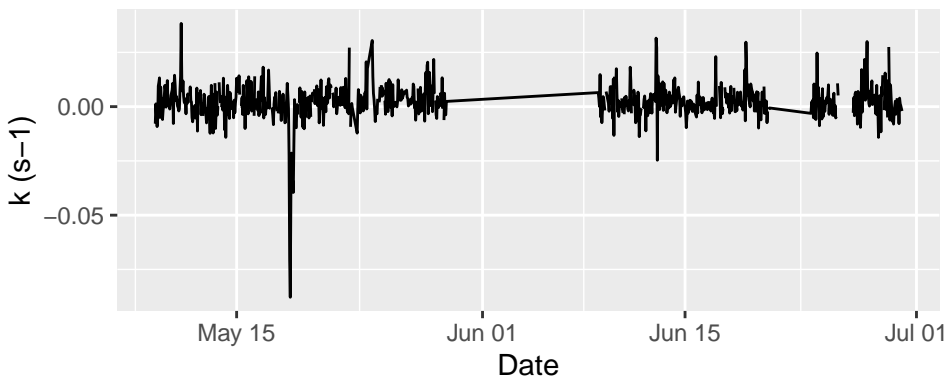

k1\_m41.038

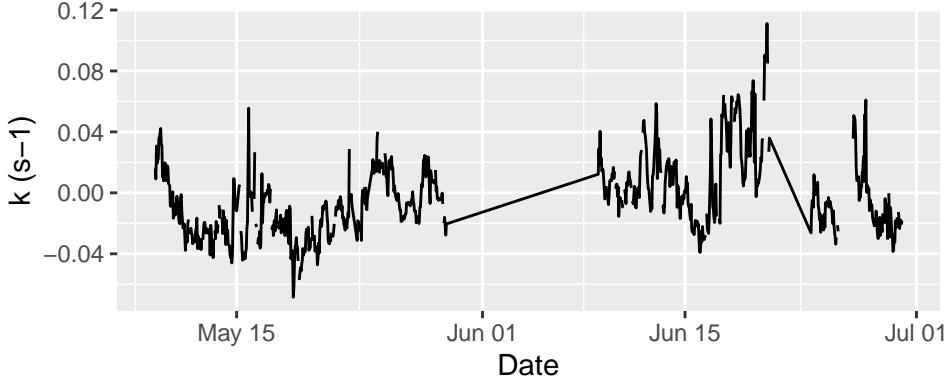

k1\_m43.018

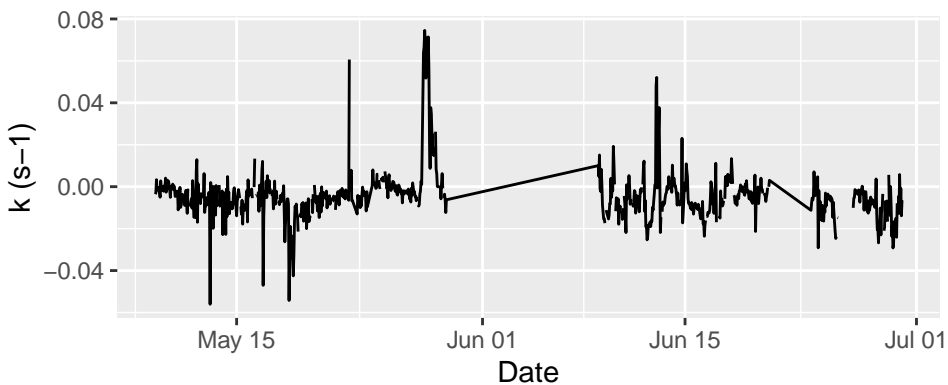

k1\_m45.033

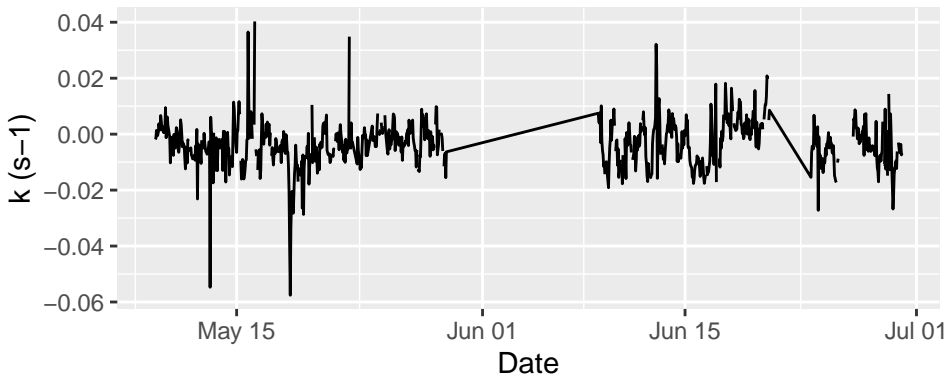

k1\_m47.013

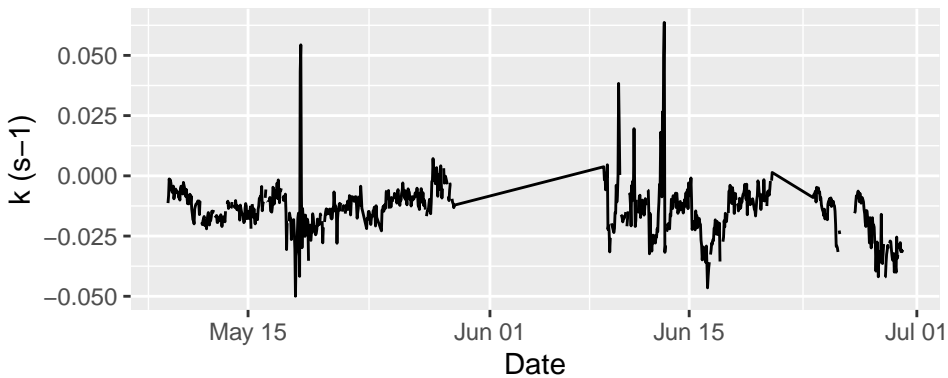

k1\_m49.014

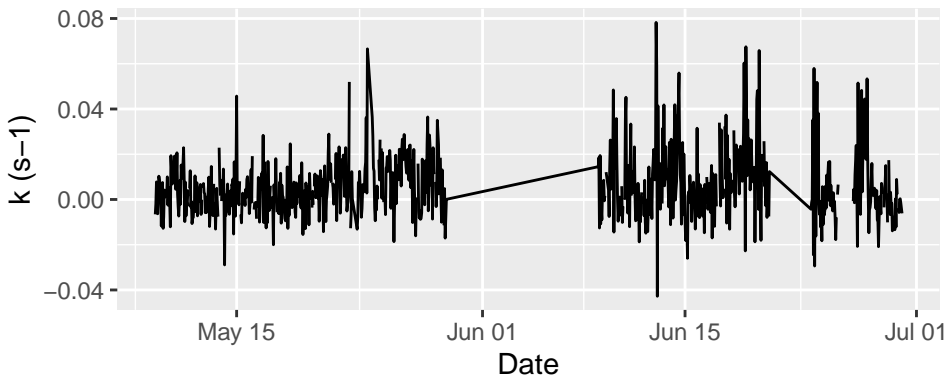

k1\_m51.022

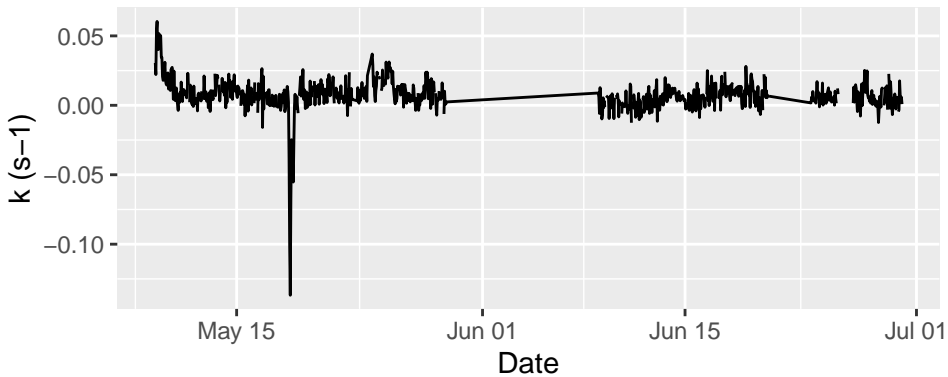

k1\_m57.069

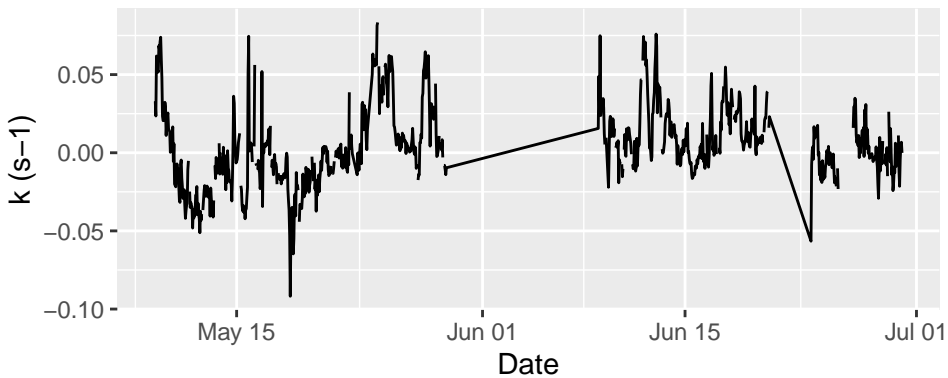

k1\_m59.049

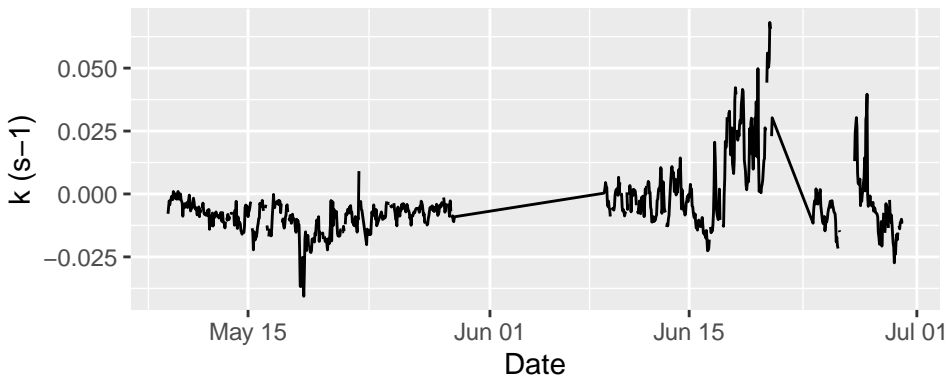

k1\_m60.048

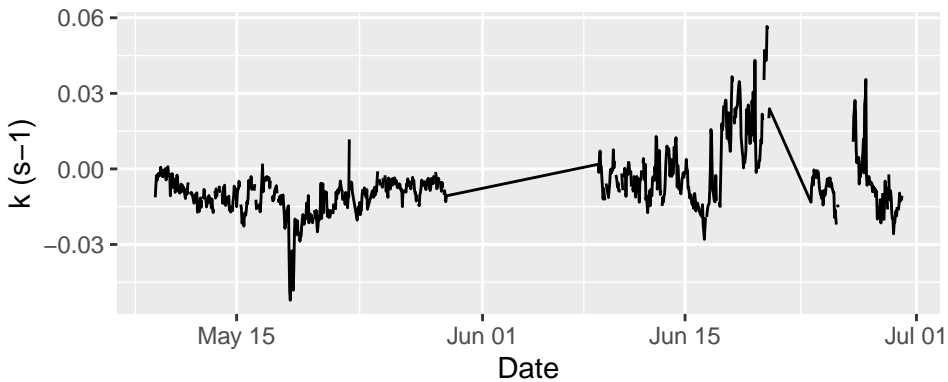

k1\_m61.029

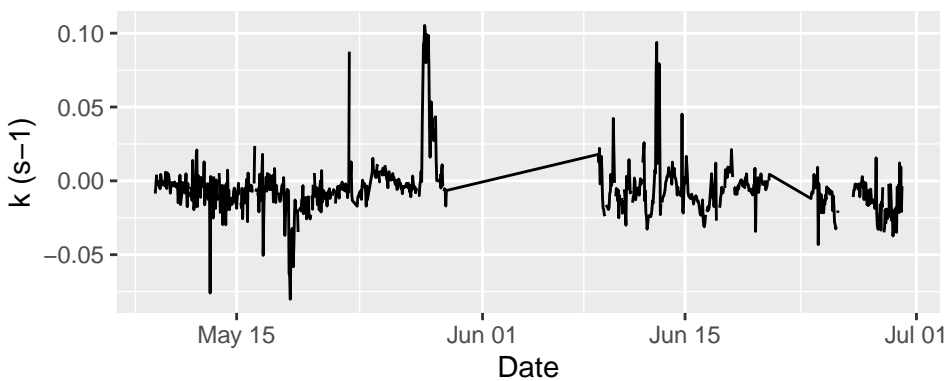

k1\_m62.029

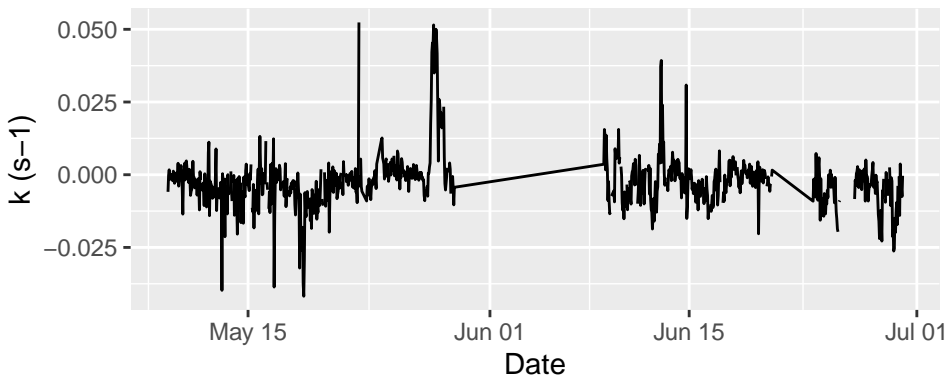

k1\_m63.006

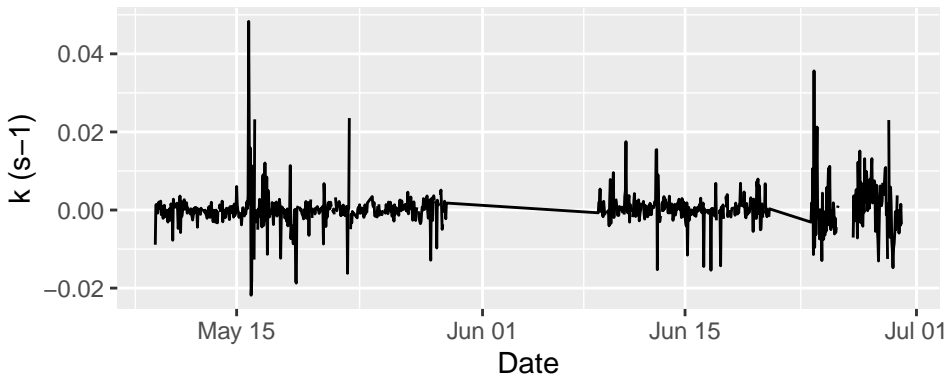

k1\_m67.053

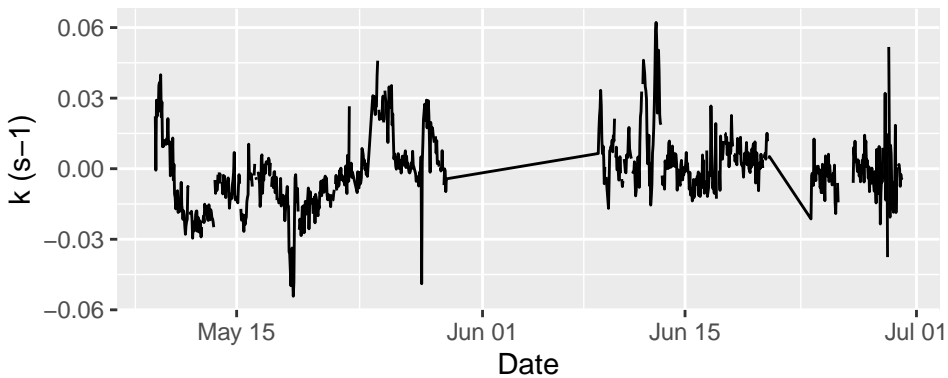

k1\_m69.070

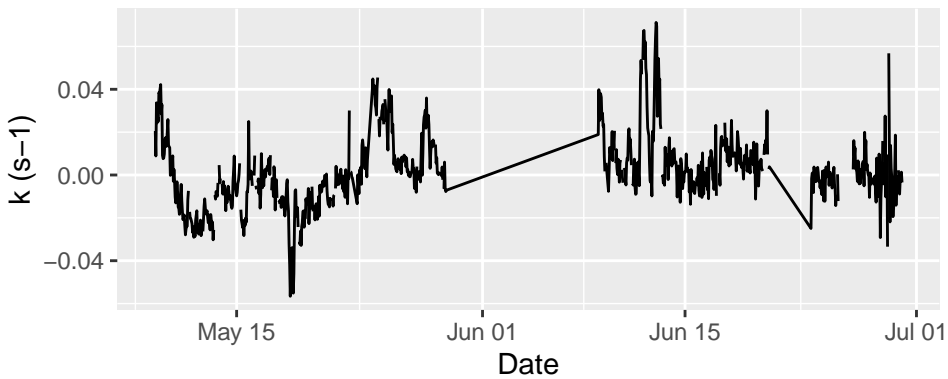

k1\_m73.064

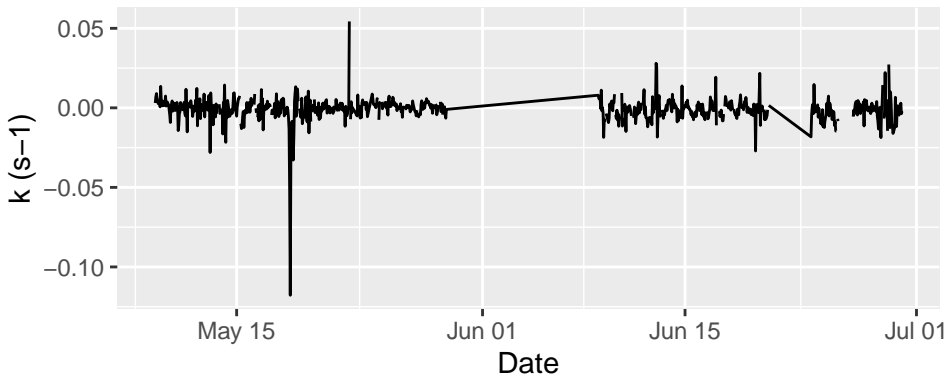

k1\_m75.025

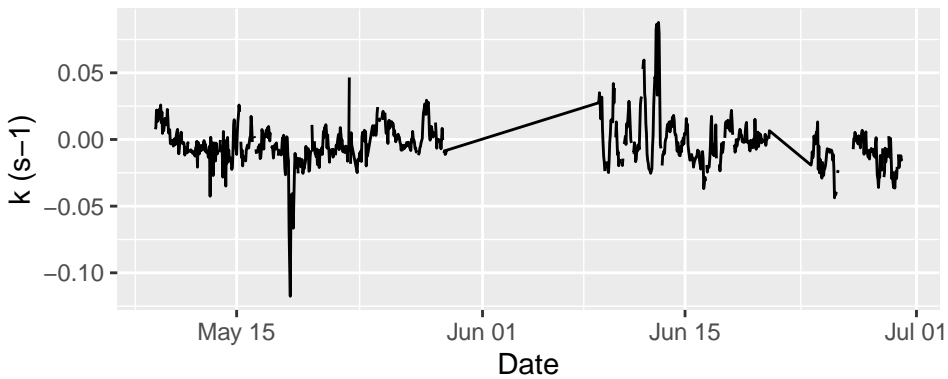

k1\_m77.005

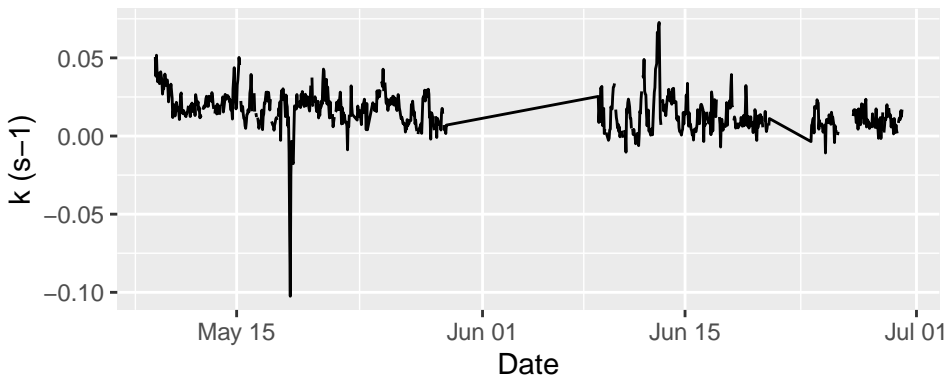

k1\_m82.074

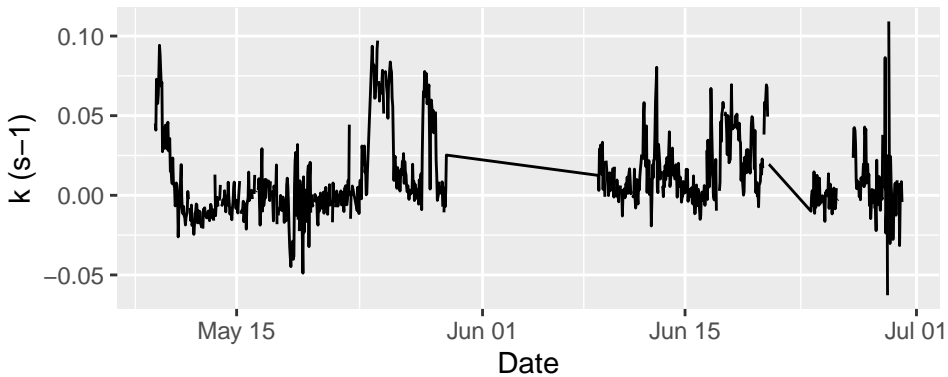

k1\_m83.049

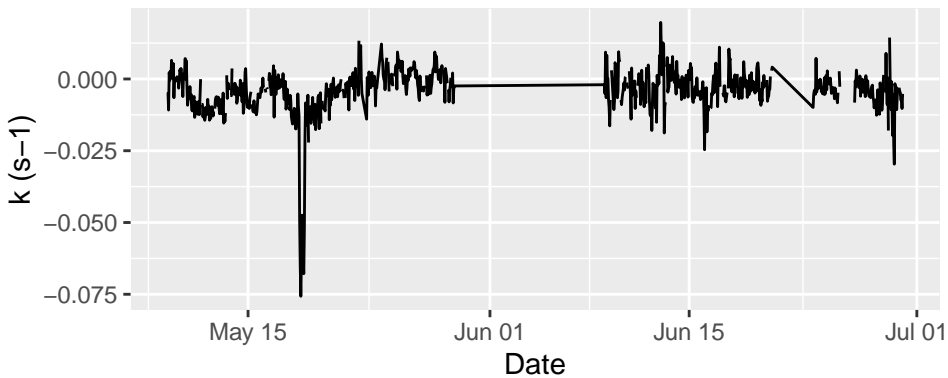

k1\_m83.084

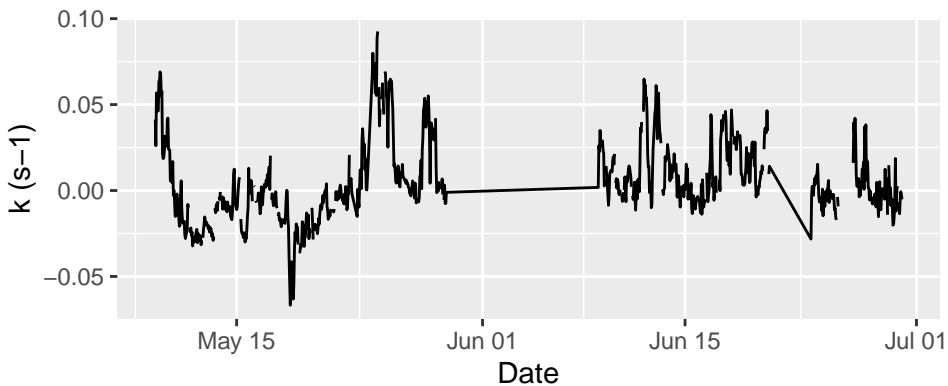

k1\_m87.042

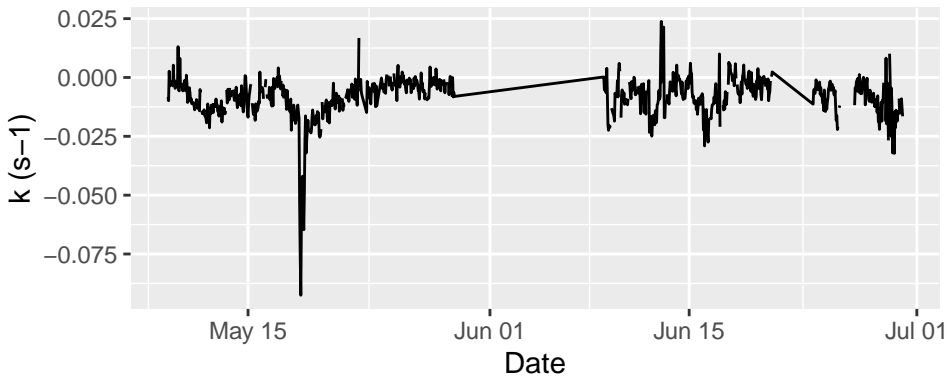

k1\_m87.078

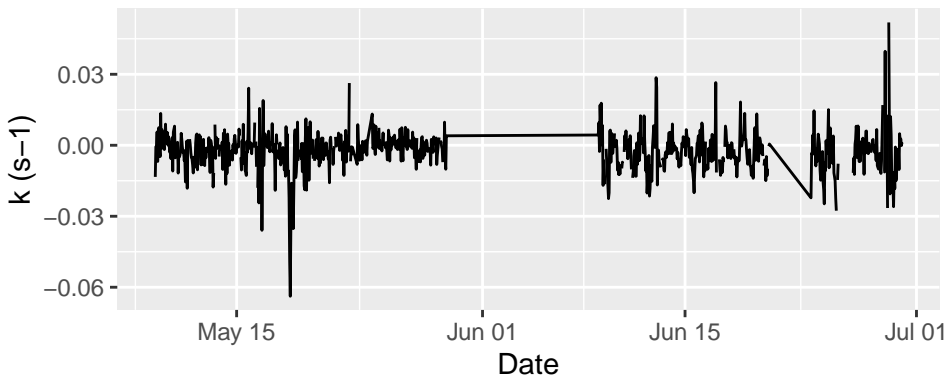



k1\_m93.035

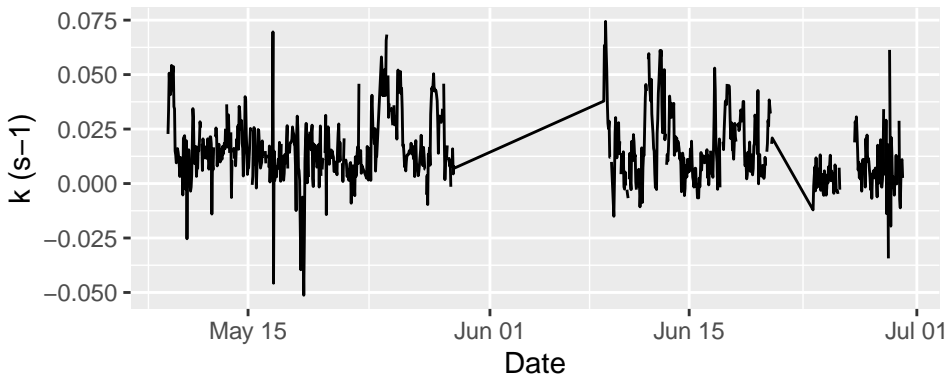

k1\_m95.015

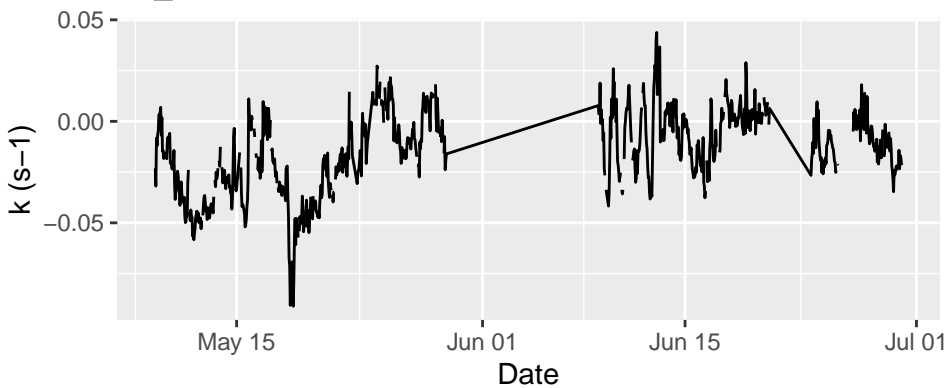

k1\_m95.083

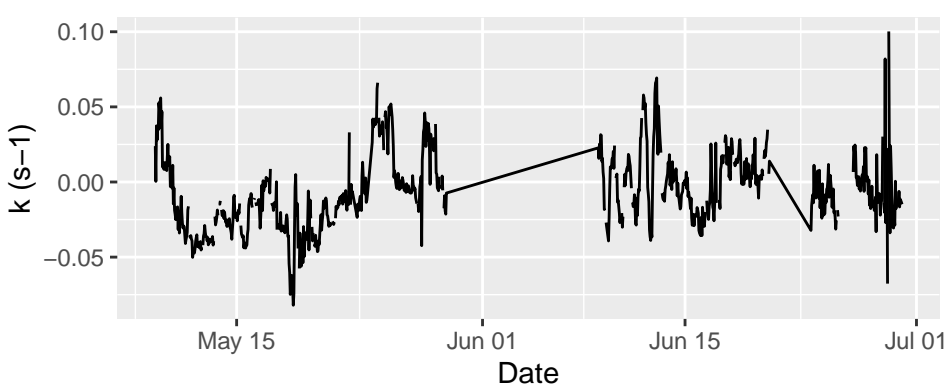

k1\_m99.008

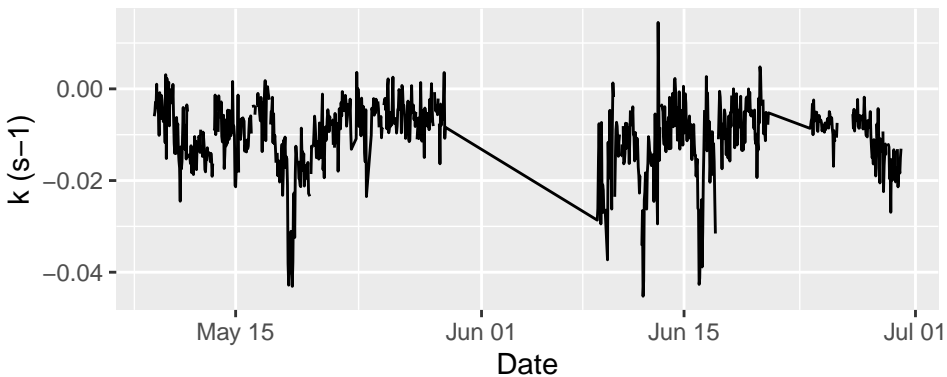

k1\_m101.059

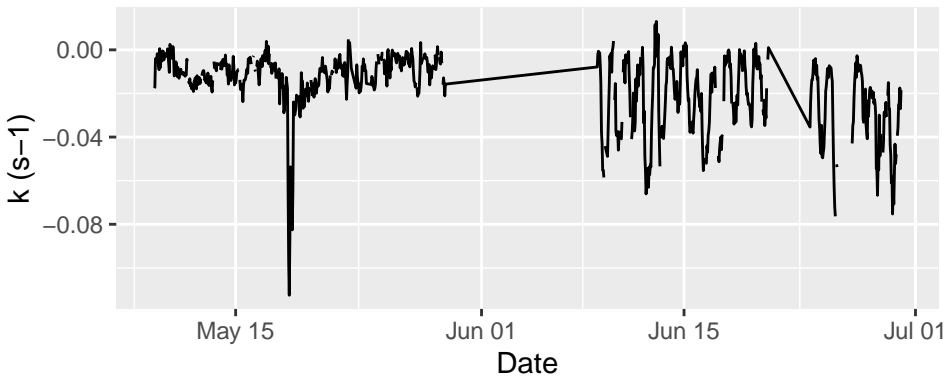

k1\_m103.074

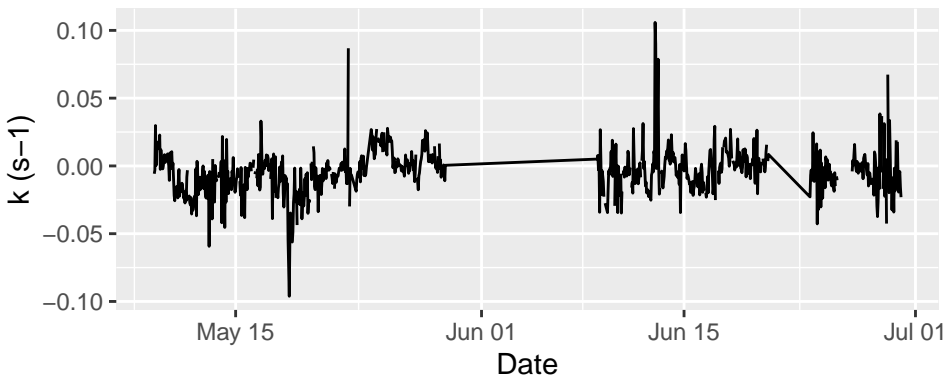

k1\_m105.066

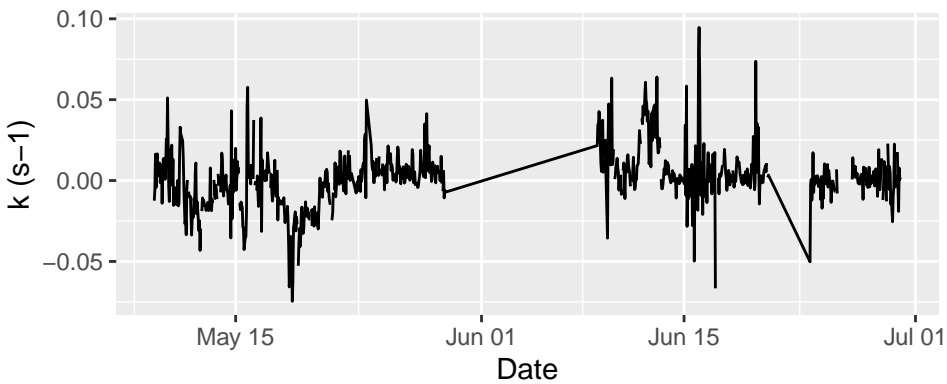

k1\_m109.100

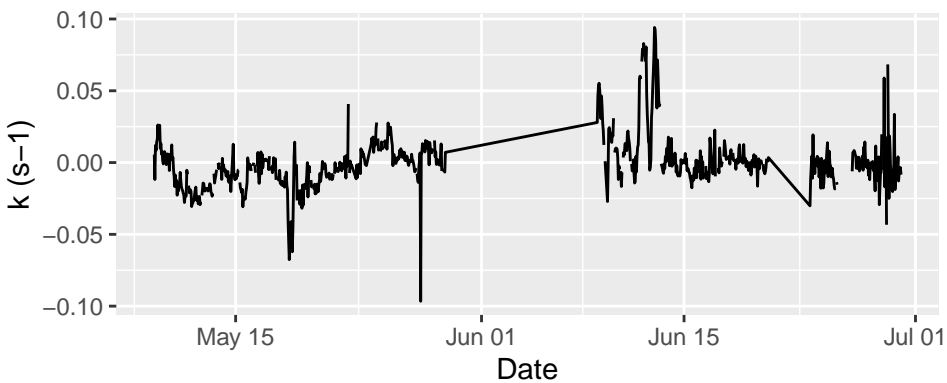

k1\_m115.078

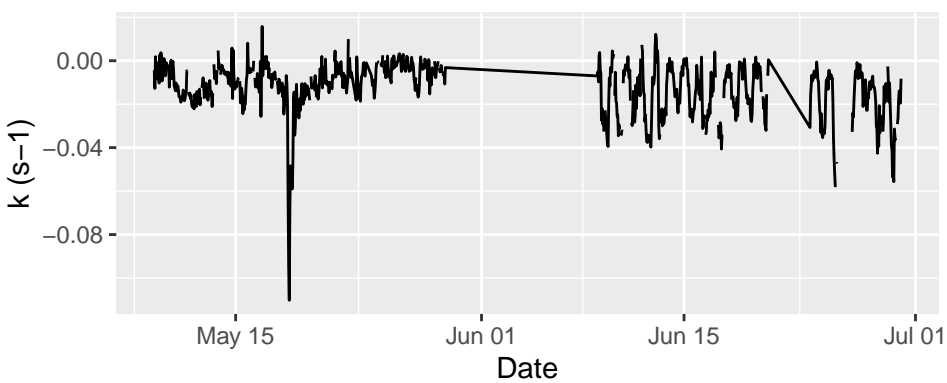

k1\_m118.074

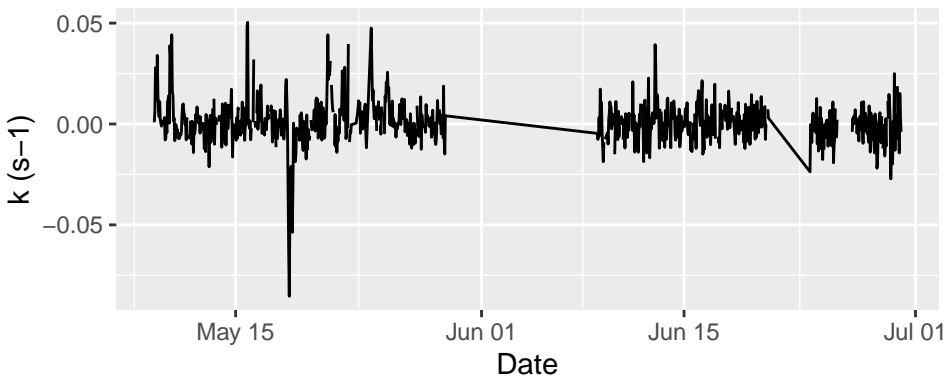

k1\_m121.098

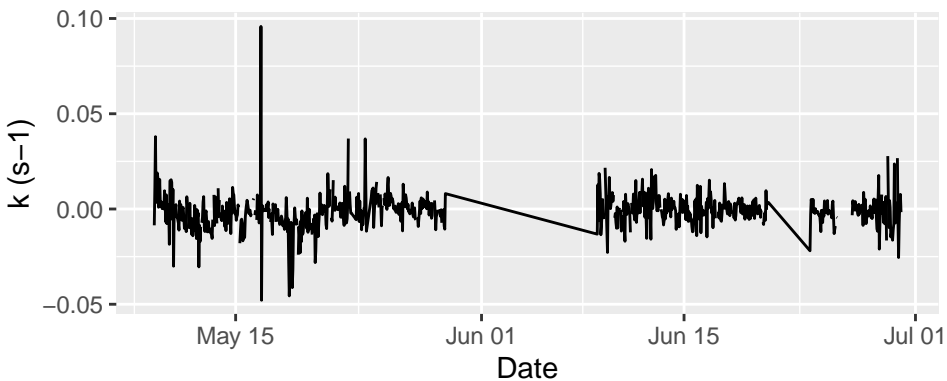

k1\_m137.129

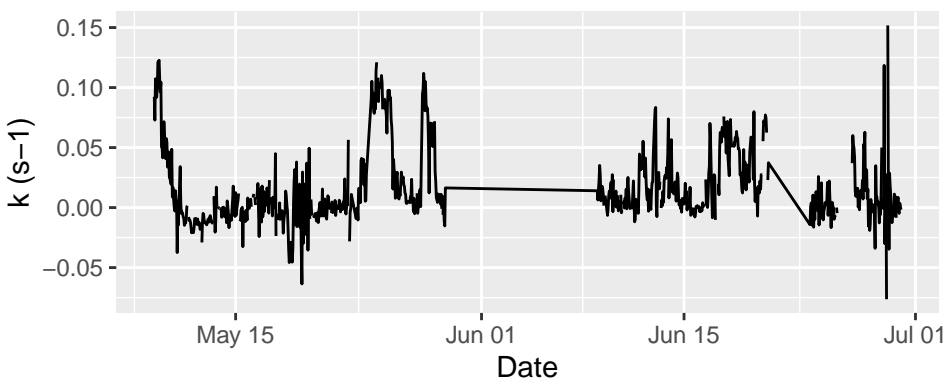

k1\_m167.052

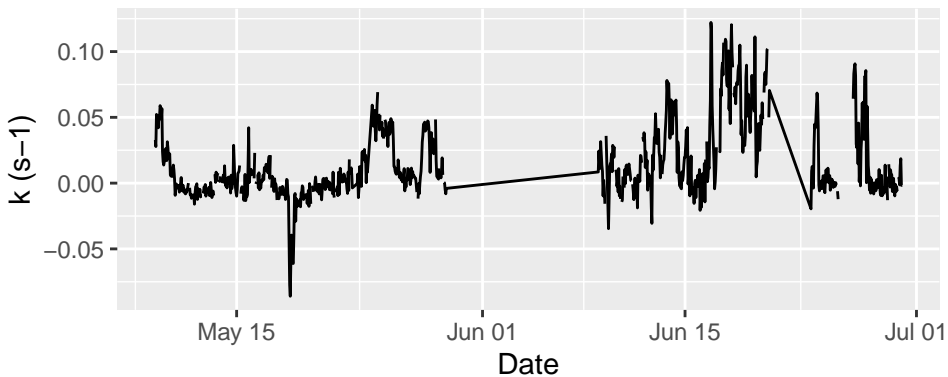

k1\_m205.186

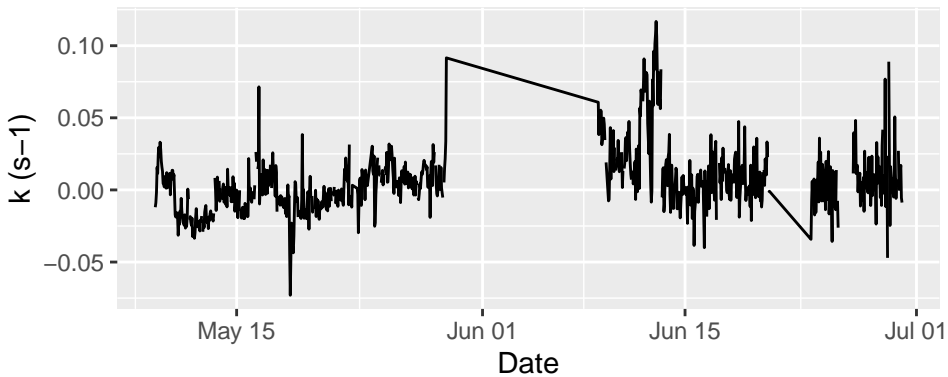

k1\_m223.057

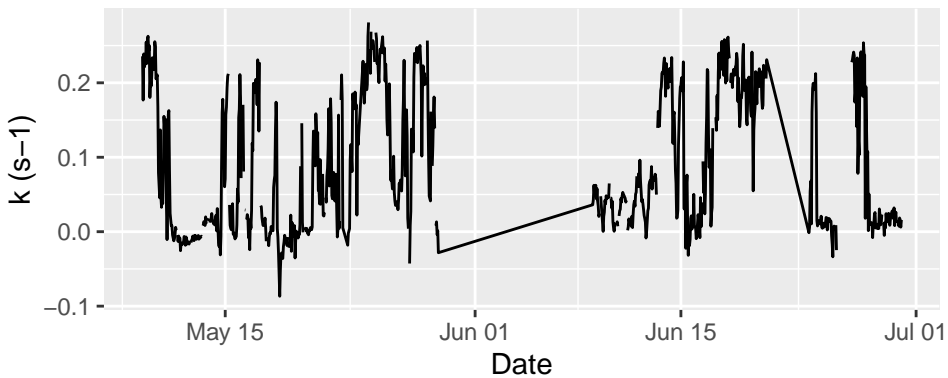

k1\_m247.006

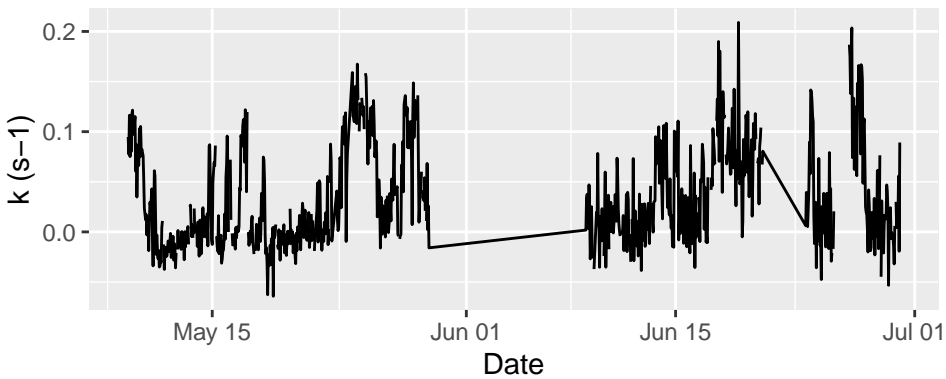

k1\_m297.071

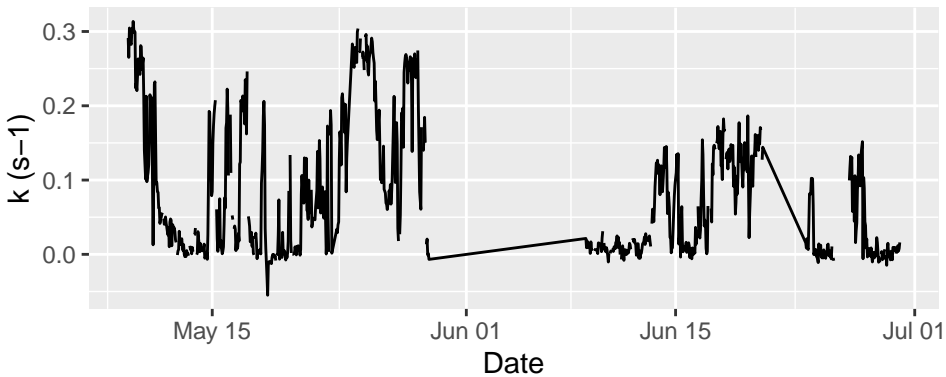

k1\_m355.051

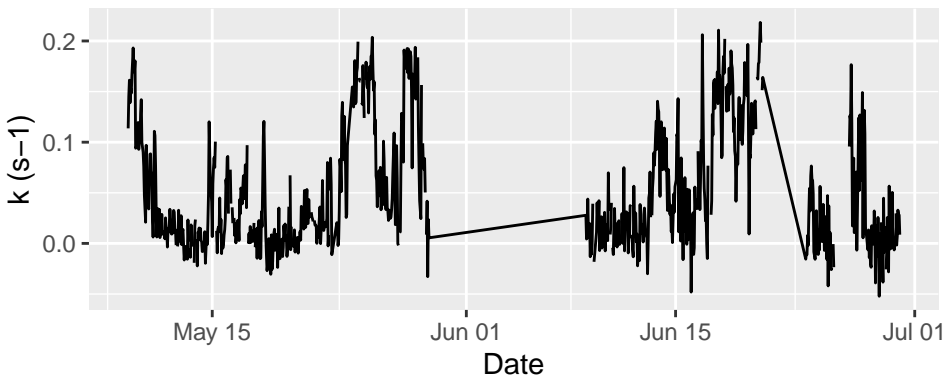

Supplement: Supplementary file 8 [file Fig. S09.pdf › Supplementary Material/Fig. S09.pdf]
