# Supplementary material
Source: Copernicus journal article supplement (doi:10.5194/egusphere-2026-401)
Supplement: Supplementary file 1 [file S02 - Calibration factors.xlsx]

## Sheet: Feuil1
Name	Modal Mass	min	max	Si(t0)/Stoluene
Nominale 17	17	16.5	17.5	1
m17.001	17.0014	16.9934	17.0093	1
(H3N)+ ammonia	17.0255	17.018	17.033	1
Nominale 18	18	17.5	18.5	1
(H2O)+	18.009	18.0028	18.0153	1
(H3N)H+	18.0331	18.0272	18.0389	10.01
Nominale 19	19	18.5	19.5	1
Nominale 20	20	19.5	20.5	1
m20.022	20.0223	20.0117	20.0328	1
Nominale 21	21	20.5	21.5	1
(H2O 18)H+ water	21.0219	21.014	21.0299	1
Nominale 22	22	21.5	22.5	1
m22.989	22.9893	22.9806	22.9979	1
Nominale 23	23	22.5	23.5	1
m23.961	23.9609	23.9481	23.9655	1
m23.97	23.97	23.9655	23.9832	1
Nominale 24	24	23.5	24.5	1
m24.143	24.1431	24.1297	24.1565	1
Nominale 25	25	24.5	25.5	1
m25.007	25.0072	24.9946	25.0198	1
Nominale 26	26	25.5	26.5	1
(C2H2)+	26.0146	26.0048	26.0244	1
Nominale 27	27	26.5	27.5	1
m27.023	27.0229	27.0127	27.0331	1
Nominale 28	28	27.5	28.5	1
(N2)+	28.005	27.9944	28.0155	1
m28.064	28.0636	28.0522	28.075	1
m28.965	28.9654	28.959	28.9718	1
Nominale 29	29	28.5	29.5	1
(N2)H+	29.013	29.0067	29.0193	1
m29.107	29.1069	29.1041	29.1097	1
m29.112	29.1118	29.1097	29.1145	1
m29.13	29.1301	29.1283	29.1319	1
m29.266	29.2659	29.2635	29.2682	1
m29.956	29.9557	29.9485	29.963	1
(NO+)	29.9977	29.9901	30.0053	1
Nominale 30	30	29.5	30.5	1
m30.067	30.0673	30.0445	30.0901	1
m30.259	30.2588	30.2346	30.283	1
m30.994	30.9943	30.9795	31.009	1
Nominale 31	31	30.5	31.5	1
(CH2O)H+ Formaldehyde	31.018	31.009	31.0329	8.71
m31.985	31.9849	31.9783	31.9914	1
Nominale 32	32	31.5	32.5	1
m32.132	32.1325	32.1254	32.1395	1
m32.143	32.1427	32.1395	32.1508	1
m32.167	32.167	32.1594	32.1746	1
m32.245	32.2455	32.2374	32.2535	1
m32.265	32.2647	32.2565	32.2729	1
(O2)H+	32.9967	32.9838	33.0095	1
Nominale 33	33	32.5	33.5	1
m33.021	33.0213	33.0095	33.0272	1
(CH4O)H+ methanol	33.0331	33.0272	33.0455	11.24
m33.994	33.9936	33.9829	34.0043	1
Nominale 34	34	33.5	34.5	1
m34.028	34.0281	34.0172	34.0389	1
Nominale 35	35	34.5	35.5	1
m35.001	35.0014	34.9861	35.0168	1
m35.026	35.0257	35.0168	35.0411	1
m35.998	35.9981	35.9828	36.0057	1
Nominale 36	36	35.5	36.5	1
m36.021	36.0212	36.0057	36.0367	1
Nominale 37	37	36.5	37.5	1
(H2OH2O)H+ cluster	37.0282	37.0187	37.0378	1
Nominale 38	38	37.5	38.5	1
m38.016	38.0157	38.0002	38.0196	1
m38.034	38.0336	38.0196	38.0477	1
m38.963	38.9634	38.9444	38.9825	1
Nominale 39	39	38.5	39.5	1
m39.023	39.0231	39.0033	39.0429	1
m39.962	39.9618	39.9472	39.9764	1
Nominale 40	40	39.5	40.5	1
m40.026	40.0263	40.0117	40.0408	1
m40.97	40.9698	40.9547	40.985	1
Nominale 41	41	40.5	41.5	1
(C3H5)+	41.038	41.0235	41.0526	1
Nominale 42	42	41.5	42.5	1
m42.008	42.0081	41.9926	42.0236	1
(C2H3N)H+ Acetonitrile	42.0346	42.0236	42.0509	1.47
Nominale 43	43	42.5	43.5	1
(C2H3O)+	43.0177	43.0023	43.033	1
(C3H6)H+ propene	43.0534	43.0379	43.0688	3.13
Nominale 44	44	43.5	44.5	1
(N2O)+	44.0014	43.9719	44.0119	1
m44.022	44.0224	44.0119	44.0498	1
m44.055	44.0555	44.0498	44.0832	1
m44.5	44.5	44.49	44.51	1
m44.52	44.52	44.51	44.53	1
m44.54	44.54	44.53	44.55	1
m44.56	44.56	44.55	44.57	1
m44.58	44.58	44.57	44.59	1
m44.6	44.6	44.59	44.61	1
m44.62	44.62	44.61	44.63	1
m44.64	44.64	44.63	44.65	1
m44.66	44.66	44.65	44.67	1
m44.68	44.68	44.67	44.69	1
m44.7	44.7	44.69	44.71	1
m44.72	44.72	44.71	44.73	1
m44.74	44.74	44.73	44.75	1
m44.76	44.76	44.75	44.77	1
m44.78	44.78	44.77	44.79	1
m44.8	44.8	44.79	44.81	1
m44.82	44.82	44.81	44.83	1
m44.84	44.84	44.83	44.85	1
m44.86	44.86	44.85	44.87	1
m44.88	44.88	44.87	44.89	1
m44.9	44.9	44.89	44.91	1
m44.92	44.92	44.91	44.93	1
m44.94	44.94	44.93	44.95	1
m44.96	44.96	44.95	44.97	1
m44.98	44.98	44.97	44.99	1
(CO2)H+	44.9968	44.9827	45.0108	1
m45	45	44.99	45.01	1
m45.02	45.02	45.01	45.03	1
(C2H4O)H+ acetaldehyde	45.0332	45.0189	45.0474	0.86
m45.04	45.04	45.03	45.05	0.86
m45.06	45.06	45.05	45.07	1
m45.08	45.08	45.07	45.09	1
m45.1	45.1	45.09	45.11	1
m45.12	45.12	45.11	45.13	1
m45.14	45.14	45.13	45.15	1
m45.16	45.16	45.15	45.17	1
m45.18	45.18	45.17	45.19	1
m45.2	45.2	45.19	45.21	1
m45.22	45.22	45.21	45.23	1
m45.24	45.24	45.23	45.25	1
m45.26	45.26	45.25	45.27	1
m45.28	45.28	45.27	45.29	1
m45.3	45.3	45.29	45.31	1
m45.32	45.32	45.31	45.33	1
m45.34	45.34	45.33	45.35	1
m45.36	45.36	45.35	45.37	1
m45.38	45.38	45.37	45.39	1
m45.4	45.4	45.39	45.41	1
m45.42	45.42	45.41	45.43	1
m45.44	45.44	45.43	45.45	1
m45.46	45.46	45.45	45.47	1
m45.48	45.48	45.47	45.49	1
m45.5	45.5	45.49	45.51	1
(NO2)+	45.9923	45.9759	46.0087	1
Nominale 46	46	45.5	46.5	1
m46.029	46.0292	46.0121	46.0463	1.37
Nominale 47	47	46.5	47.5	1
(CH2O2)H+ formic acid	47.0126	46.9944	47.0309	2.27
(C2H6O)H+ ethanol	47.0485	47.0309	47.0667	89.24
m47.968	47.9677	47.9437	47.9736	1
m47.996	47.996	47.9736	48.0067	1
Nominale 48	48	47.5	48.5	1
m48.017	48.0174	48.0067	48.0401	186.87
m48.052	48.0521	48.0401	48.0733	1
m48.99	48.9903	48.9696	48.9937	1
Nominale 49	49	48.5	49.5	1
m49.014	49.014	48.9937	49.0204	0.97
m49.027	49.0269	49.0204	49.0463	0.89
m49.052	49.0519	49.0463	49.073	1
m49.999	49.9987	49.981	50.0164	1
Nominale 50	50	49.5	50.5	1
m50.985	50.9847	50.9635	50.9944	1
Nominale 51	51	50.5	51.5	1
m51.004	51.004	50.9944	51.0129	1
m51.022	51.0218	51.0129	51.0412	1
m51.043	51.0428	51.0412	51.0622	1
m51.939	51.9395	51.921	51.958	1
m51.995	51.9949	51.9762	52.0135	1
Nominale 52	52	51.5	52.5	1
m52.028	52.0277	52.0135	52.0485	0.51
m52.941	52.9408	52.9218	52.9599	1
Nominale 53	53	52.5	53.5	1
m53.002	53.002	52.9828	53.0192	1
m53.038	53.0382	53.0192	53.0573	1.12
(Fe)+	53.9389	53.9151	53.9626	1
m53.992	53.9922	53.9682	54.0005	1
Nominale 54	54	53.5	54.5	1
m54.009	54.0088	54.0005	54.0101	1
(C3H3N)H+ acrylonitrile	54.0355	54.0101	54.061	0.49
m54.938	54.9376	54.9193	54.956	1
Nominale 55	55	54.5	55.5	1
m55.018	55.0184	54.9975	55.0339	0.65
m55.054	55.0536	55.0339	55.0733	1.22
m55.934	55.9339	55.9141	55.9537	1
Nominale 56	56	55.5	56.5	1
m56.024	56.0236	56.0025	56.0371	1
m56.058	56.0575	56.0371	56.078	0.54
Nominale 57	57	56.5	57.5	1
(C3H4O)H+ acrolein	57.033	57.0122	57.0484	1.49
(C4H8)H+ fragment butanol	57.0689	57.0484	57.0895	1.09
m57.934	57.9341	57.911	57.9572	1
Nominale 58	58	57.5	58.5	1
m58.041	58.0408	58.0167	58.044	1.72
m58.068	58.0685	58.044	58.0929	1.05
Nominale 59	59	58.5	59.5	1
(C3H6O)H+ acetone	59.0489	59.0278	59.07	0.66
m59.931	59.9306	59.9068	59.9423	1
m59.966	59.9658	59.9423	59.9894	1
Nominale 60	60	59.5	60.5	1
m60.02	60.0204	59.9953	60.0233	1
m60.048	60.0482	60.0233	60.0732	1.38
(C3H7NH2)H+ propylamine or trimethylamine	60.0795	60.0732	60.1054	1.14
Nominale 61	61	60.5	61.5	1
(C2H4O2)H+ acid acetique	61.0292	61.0074	61.0509	1.03
m61.927	61.9275	61.9012	61.9524	1
m61.981	61.9809	61.9524	62.0012	1
Nominale 62	62	61.5	62.5	1
m62.029	62.0289	62.0012	62.0566	1.21
m62.929	62.9295	62.8937	62.9652	1
Nominale 63	63	62.5	63.5	1
m63.006	63.0062	62.9691	63.0433	1
m63.928	63.9275	63.9	63.9352	1
m63.943	63.9428	63.9352	63.9524	1
m63.982	63.9821	63.9524	63.9922	1
Nominale 64	64	63.5	64.5	1
(HNO3)H+	64.0022	63.9922	64.0322	1
m64.927	64.9273	64.8933	64.9451	1
m64.963	64.963	64.9451	64.9835	1
Nominale 65	65	64.5	65.5	1
(C2H2F2)H+	65.0195	64.9835	65.0284	1
m65.037	65.0373	65.0284	65.0713	1
Nominale 66	66	65.5	66.5	1
m66.014	66.0136	65.9887	66.0203	1
m66.045	66.0448	66.0203	66.0692	0.51
Nominale 67	67	66.5	67.5	1
m67.053	67.0531	67.0292	67.077	0.29
Nominale 68	68	67.5	68.5	1
m68.052	68.0523	68.0214	68.0832	1.05
m68.995	68.9948	68.97	69.0069	0.85
Nominale 69	69	68.5	69.5	1
(C4H4O)H+ furan	69.0326	69.0069	69.045	1.08
(C5H8)H+ isoprene + MBO	69.0698	69.045	69.0946	4.02
m69.995	69.9947	69.9672	70.0084	1
Nominale 70	70	69.5	70.5	1
m70.039	70.0388	70.0084	70.0451	1
m70.073	70.0725	70.0451	70.1	0.86
m70.941	70.9412	70.9159	70.9664	1
Nominale 71	71	70.5	71.5	1
m71.012	71.0119	70.9861	71.0224	1.05
(C4H6O)H+ MVK+MAKR	71.0482	71.0224	71.0589	0.97
(C5H10)H+ pentene	71.0844	71.0589	71.1099	0.76
m71.936	71.9362	71.9057	71.9667	1
Nominale 72	72	71.5	72.5	1
m72.017	72.0174	71.9847	72.0211	1
m72.051	72.0513	72.0211	72.0593	1
m72.088	72.0879	72.0593	72.1165	0.99
m72.936	72.9362	72.9102	72.9622	1
Nominale 73	73	72.5	73.5	1
(C3H4O2)H+ propenoic acid	73.0293	73.0009	73.0368	0.94
(C4H8O)H+ butanone MEK	73.0637	73.0368	73.0905	0.87
m73.943	73.9427	73.9057	73.9797	1
Nominale 74	74	73.5	74.5	1
m74.06	74.0597	74.0214	74.0981	1
m74.937	74.9373	74.9147	74.96	1
Nominale 75	75	74.5	75.5	1
m75.025	75.0253	75.0015	75.0492	1
m75.944	75.9439	75.9166	75.9713	1
Nominale 76	76	75.5	76.5	1
m76.025	76.025	75.9974	76.0526	0.55
m76.934	76.9337	76.899	76.9685	1
Nominale 77	77	76.5	77.5	1
m77.005	77.0051	76.9716	77.0386	1
m77.939	77.9395	77.9116	77.9674	1
Nominale 78	78	77.5	78.5	1
m78.004	78.0037	77.9754	78.032	1.06
m78.043	78.043	78.032	78.0738	1
m78.938	78.938	78.9083	78.9677	1
Nominale 79	79	78.5	79.5	1
m79.002	79.0023	78.9718	79.024	1
(C6H6)H+ benzene	79.0527	79.024	79.0813	0.92
m79.937	79.9368	79.9071	79.9665	1
Nominale 80	80	79.5	80.5	1
m80.016	80.0157	79.9817	80.0258	1
m80.056	80.0562	80.0258	80.0866	0.61
m80.941	80.9415	80.9125	80.9667	1
m80.997	80.9967	80.9667	81.0268	1
Nominale 81	81	80.5	81.5	1
(C6H8)H+ hexene + fragment 137	81.0681	81.039	81.0972	1
m81.936	81.9365	81.9067	81.9663	1
Nominale 82	82	81.5	82.5	1
m82	82.0001	81.9687	82.0315	1
m82.074	82.0737	82.0429	82.1046	0.59
m82.944	82.9436	82.9137	82.9734	1
Nominale 83	83	82.5	83.5	1
(C2HF3)H+	83.012	82.9783	83.0178	1
(C5H6O)H+ Methylfuran	83.049	83.0178	83.054	0.99
(C6H10)H+ hexadiene or C6 green leaf volatiles	83.084	83.054	83.1141	1
m83.928	83.9281	83.895	83.9612	1
Nominale 84	84	83.5	84.5	1
m84.044	84.0444	84.0104	84.0545	1
m84.088	84.0878	84.0545	84.1212	0.49
m84.937	84.9368	84.9065	84.9493	1
m84.962	84.9617	84.9493	84.9938	1
Nominale 85	85	84.5	85.5	1
m85.027	85.0268	84.9959	85.0576	1.1
(C5H8O)H+ Ethyl vinyl ketone (pentenone) or pente	85.0642	85.0576	85.0692	0.75
(C6H12)H+ hexene	85.0997	85.0692	85.1301	1
m85.937	85.9373	85.9026	85.9719	1
Nominale 86	86	85.5	86.5	1
(C4H7NO)H+	86.0589	86.024	86.0937	1
m86.103	86.1028	86.0937	86.1374	1
m86.96	86.96	86.9275	86.9924	1
Nominale 87	87	86.5	87.5	1
(C4H6O2)H+ butenoic acid	87.0424	87.011	87.0738	1
(C5H10O)H+ pentanal/pentanone or methyl butenol (	87.0778	87.0738	87.1115	0.98
m87.942	87.9423	87.9105	87.9741	1
Nominale 88	88	87.5	88.5	1
m88.048	88.0484	88.0137	88.0612	1
m88.074	88.074	88.0612	88.106	1
m88.951	88.9511	88.919	88.9833	1
Nominale 89	89	88.5	89.5	1
(C3H4O3)H+	89.0242	88.9896	89.0263	0.73
(C4H8O2)H+	89.0583	89.0263	89.0902	0.97
m89.938	89.9383	89.9089	89.9678	1
Nominale 90	90	89.5	90.5	1
m90.018	90.0179	89.9887	90.0312	1
m90.061	90.0608	90.0312	90.0903	0.55
m90.946	90.9459	90.9166	90.9751	1
Nominale 91	91	90.5	91.5	1
m91.054	91.0539	91.0243	91.0835	1
m91.942	91.9418	91.9072	91.9763	1
Nominale 92	92	91.5	92.5	1
m92.057	92.0567	92.0222	92.0912	0.76
m92.947	92.9472	92.9189	92.9756	1
Nominale 93	93	92.5	93.5	1
(C6H5O)+	93.0346	93.0052	93.0641	1
m93.954	93.9537	93.9194	93.988	1
Nominale 94	94	93.5	94.5	1
m94.035	94.0353	94.0015	94.069	0.56
m94.942	94.9421	94.904	94.9769	1
Nominale 95	95	94.5	95.5	1
m95.015	95.0147	94.9769	95.0524	0.77
m95.083	95.0831	95.0524	95.1206	1
m95.95	95.9499	95.9121	95.9767	1
Nominale 96	96	95.5	96.5	1
m96.015	96.0146	95.9767	96.0526	1
m96.088	96.0878	96.0526	96.1259	0.76
m96.961	96.9606	96.9139	96.9721	1
Nominale 97	97	96.5	97.5	1
m97.013	97.0131	96.9721	97.054	0.64
m97.098	97.0981	97.0606	97.1357	1
m97.947	97.9472	97.9111	97.9833	1
Nominale 98	98	97.5	98.5	1
m98.026	98.0258	97.9878	98.0438	1
m98.062	98.0618	98.0438	98.068	1
m98.104	98.1041	98.068	98.1401	0.49
m98.956	98.9563	98.9172	98.9703	1
Nominale 99	99	98.5	99.5	1
m99.008	99.0076	98.9703	99.0256	0.98
m99.044	99.0436	99.0256	99.0606	0.98
(C6H10O)H+ hexenal/hexenone	99.0775	99.0606	99.08	0.61
(C7H14)H+ heptene	99.1156	99.08	99.1512	1
m99.943	99.9428	99.9057	99.9799	1
m99.995	99.9948	99.9799	100.001	1
Nominale 100	100	99.5	100.5	1
m100.04	100.04	100.001	100.057	1
m100.074	100.074	100.057	100.112	1
m100.117	100.117	100.112	100.155	1
m100.936	100.936	100.899	100.973	1
Nominale 101	101	100.5	101.5	1
m101.023	101.023	100.984	101.041	0.72
(C5H8O2)H+ pentenoic acid or ISOPOOH (unsaturated	101.059	101.041	101.096	0.86
m101.939	101.939	101.904	101.975	1
Nominale 102	102	101.5	102.5	1
m102.022	102.022	101.983	102.024	1
m102.06	102.06	102.024	102.073	1
m102.086	102.086	102.073	102.104	1
m102.122	102.122	102.104	102.162	1
m102.943	102.943	102.905	102.981	1
Nominale 103	103	102.5	103.5	1
(C4H6O3)H+ (C7H5N)+ peroxymethacrylic nitric anh	103.04	103	103.057	0.66
(C5H10O2)H+ pentanoic acid	103.074	103.057	103.112	0.94
m103.942	103.942	103.9	103.984	1
Nominale 104	104	103.5	104.5	1
m104.053	104.053	104.008	104.099	0.59
m104.942	104.942	104.902	104.982	1
Nominale 105	105	104.5	105.5	1
m105.032	105.032	104.994	105.049	1
m105.066	105.066	105.049	105.107	0.87
m105.932	105.932	105.894	105.97	1
Nominale 106	106	105.5	106.5	1
m106.037	106.037	105.998	106.054	1
m106.071	106.071	106.054	106.111	0.74
m106.943	106.943	106.901	106.986	1
Nominale 107	107	106.5	107.5	1
(C7H6O)H+ benzaldehyde	107.049	107.008	107.065	0.69
m107.081	107.081	107.065	107.121	0.9
m107.947	107.947	107.913	107.982	1
Nominale 108	108	107.5	108.5	1
m108.053	108.053	108.018	108.069	0.74
m108.084	108.084	108.069	108.121	0.63
m108.956	108.956	108.918	108.995	1
Nominale 109	109	108.5	109.5	1
m109.028	109.028	108.995	109.061	0.76
(C8H12)H+	109.1	109.061	109.139	1
m109.953	109.953	109.91	109.997	1
Nominale 110	110	109.5	110.5	1
m110.103	110.103	110.059	110.147	0.62
m110.957	110.957	110.918	110.996	1
Nominale 111	111	110.5	111.5	1
m111.046	111.046	111.006	111.085	1.17
(C8H14)H+ octadiene	111.115	111.085	111.154	1
m111.947	111.947	111.901	111.993	1
Nominale 112	112	111.5	112.5	1
m112.045	112.045	111.998	112.073	0.55
m112.119	112.119	112.073	112.166	1
m112.951	112.951	112.902	112.974	1
Nominale 113	113	112.5	113.5	1
m113.023	113.023	112.974	113.072	0.71
m113.129	113.129	113.08	113.177	1
Nominale 114	114	113.5	114.5	1
m114.026	114.026	113.981	114.048	0.77
(C6H11NO)H+	114.089	114.048	114.13	1
m114.959	114.959	114.881	114.991	1
Nominale 115	115	114.5	115.5	1
m115.024	115.024	114.991	115.051	0.71
m115.078	115.078	115.051	115.146	0.81
m115.944	115.944	115.872	115.968	1
Nominale 116	116	115.5	116.5	1
m116.037	116.037	115.968	116.055	1
m116.074	116.074	116.055	116.147	1
m116.904	116.904	116.859	116.948	1
Nominale 117	117	116.5	117.5	1
m117.019	117.019	116.969	117.041	1
m117.087	117.087	117.041	117.133	0.89
m117.953	117.953	117.899	118.008	1
Nominale 118	118	117.5	118.5	1
m118.074	118.074	118.012	118.136	0.76
m118.902	118.902	118.858	118.922	1
m118.941	118.941	118.922	118.985	1
Nominale 119	119	118.5	119.5	1
m119.082	119.082	119.038	119.126	0.89
m119.948	119.948	119.91	119.987	1
Nominale 120	120	119.5	120.5	1
m120.05	120.05	120.009	120.069	1
m120.087	120.087	120.069	120.126	0.72
m120.899	120.899	120.84	120.926	1
m120.952	120.952	120.926	121.011	1
Nominale 121	121	120.5	121.5	1
m121.098	121.098	121.036	121.16	0.92
m121.948	121.948	121.897	121.999	1
Nominale 122	122	121.5	122.5	1
m122.057	122.057	122.005	122.11	1
m122.955	122.955	122.911	122.998	1
Nominale 123	123	122.5	123.5	1
m123.042	123.042	122.998	123.086	0.61
(C9H14)H+ Santene (2.3-dimethylbicyclo hept-2-ene	123.115	123.086	123.159	1
m123.943	123.943	123.894	123.993	1
Nominale 124	124	123.5	124.5	1
m124.044	124.044	123.995	124.068	0.95
m124.117	124.117	124.068	124.166	1
m124.951	124.951	124.901	125	1
Nominale 125	125	124.5	125.5	1
m125.057	125.057	125.002	125.081	0.99
m125.13	125.13	125.081	125.179	1
m125.957	125.957	125.917	125.997	1
Nominale 126	126	125.5	126.5	1
m126.092	126.092	126.049	126.094	1
m126.135	126.135	126.094	126.176	0.48
m126.963	126.963	126.91	127.016	0.74
Nominale 127	127	126.5	127.5	1
m127.039	127.039	127.016	127.058	0.71
m127.076	127.076	127.058	127.09	1
m127.144	127.144	127.09	127.198	1
m127.962	127.962	127.89	127.991	1
Nominale 128	128	127.5	128.5	1
m128.068	128.068	127.991	128.144	1
m128.148	128.148	128.144	128.222	1
m128.896	128.896	128.818	128.934	1
m128.972	128.971	128.934	128.972	1
Nominale 129	129	128.5	129.5	1
m129.062	129.062	128.972	129.151	0.71
m129.912	129.912	129.811	129.942	1
Nominale 130	130	129.5	130.5	1
m130.053	130.053	129.942	130.1	1
m130.147	130.147	130.1	130.263	1
m130.901	130.901	130.825	130.906	1
m130.991	130.991	130.906	131.021	1
Nominale 131	131	130.5	131.5	1
m131.099	131.099	131.021	131.177	0.84
m131.907	131.907	131.816	131.961	1
Nominale 132	132	131.5	132.5	1
(C5H9NO3)H+	132.064	131.961	132.167	0.48
m132.91	132.91	132.846	132.94	1
m132.969	132.969	132.94	133.03	1
Nominale 133	133	132.5	133.5	1
m133.098	133.098	133.03	133.165	0.84
m133.95	133.95	133.883	134.003	1
Nominale 134	134	133.5	134.5	1
m134.068	134.068	134.003	134.084	1
m134.101	134.101	134.084	134.163	1
m134.963	134.963	134.89	135.036	1
Nominale 135	135	134.5	135.5	1
m135.114	135.114	135.051	135.176	0.96
Nominale 136	136	135.5	136.5	1
m136.021	136.021	135.969	136.073	1
m136.076	136.076	136.073	136.097	1
m136.118	136.118	136.097	136.169	1
m136.952	136.952	136.903	137.001	1
Nominale 137	137	136.5	137.5	1
(C8H8O2)H+	137.058	137.006	137.08	0.83
m137.129	137.129	137.08	137.179	2.85
m137.958	137.958	137.904	138.012	1
Nominale 138	138	137.5	138.5	1
m138.059	138.059	138.012	138.078	0.52
m138.133	138.133	138.078	138.188	1
Nominale 139	139	138.5	139.5	1
m139.037	139.037	138.971	139.081	1
m139.143	139.143	139.081	139.206	1
Nominale 140	140	139.5	140.5	1
m140.149	140.149	140.091	140.207	1
Nominale 141	141	140.5	141.5	1
m141.056	141.056	141	141.073	1
m141.09	141.09	141.073	141.103	1
m141.159	141.159	141.103	141.214	1
m141.951	141.951	141.883	142.019	1
Nominale 142	142	141.5	142.5	1
m142.08	142.08	142.019	142.093	1
m142.163	142.163	142.093	142.234	1
Nominale 143	143	142.5	143.5	1
m143.097	143.097	142.971	143.223	0.82
m143.969	143.969	143.875	143.997	1
Nominale 144	144	143.5	144.5	1
m144.097	144.097	143.997	144.197	1
Nominale 145	145	144.5	145.5	1
m145.118	145.118	145.052	145.184	0.81
C6Cl2H4+	145.968	145.884	146.034	1
Nominale 146	146	145.5	146.5	1
m146.119	146.119	146.034	146.205	1
m146.973	146.973	146.917	147.03	1
Nominale 147	147	146.5	147.5	1
m147.05	147.05	147.03	147.08	0.93
m147.11	147.11	147.08	147.171	0.93
m147.972	147.972	147.91	147.977	1
Nominale 148	148	147.5	148.5	1
m148.037	148.037	147.977	148.097	1
m148.116	148.116	148.097	148.179	1
Nominale 149	149	148.5	149.5	1
m149.036	149.036	148.97	149.102	1
m149.127	149.127	149.102	149.191	0.8
Nominale 150	150	149.5	150.5	1
m150.041	150.041	149.976	150.105	1
m150.129	150.129	150.105	150.193	1
Nominale 151	151	150.5	151.5	1
m151.024	151.024	150.959	151.078	1
m151.143	151.143	151.078	151.209	1
Nominale 152	152	151.5	152.5	1
m152.027	152.027	151.948	152.072	1
m152.149	152.149	152.072	152.226	1
Nominale 153	153	152.5	153.5	1
m153.095	153.095	153.016	153.126	0.79
m153.157	153.157	153.126	153.23	0.69
Nominale 154	154	153.5	154.5	1
m154.085	154.085	154.005	154.092	1
m154.166	154.166	154.092	154.241	1
Nominale 155	155	154.5	155.5	1
(C12H10)H+	155.085	155.013	155.107	0.69
m155.175	155.175	155.107	155.243	0.79
Nominale 156	156	155.5	156.5	1
m156.096	156.096	156.04	156.152	1
m156.175	156.175	156.152	156.234	1
Nominale 157	157	156.5	157.5	1
m157.105	157.105	156.996	157.213	0.78
Nominale 158	158	157.5	158.5	1
m158.023	158.023	157.949	158.055	1
m158.088	158.088	158.055	158.116	1
m158.145	158.145	158.116	158.219	1
m158.906	158.906	158.839	158.906	1
m158.977	158.977	158.906	159.048	1
Nominale 159	159	158.5	159.5	1
m159.131	159.131	159.063	159.2	1
m159.863	159.863	159.777	159.949	1
Nominale 160	160	159.5	160.5	1
m160.132	160.132	160.041	160.222	1
m160.904	160.904	160.809	160.943	1
m160.982	160.982	160.943	160.995	1
Nominale 161	161	160.5	161.5	1
m161.096	161.096	160.995	161.198	1
m161.907	161.907	161.831	161.936	1
m161.965	161.965	161.936	162.01	1
Nominale 162	162	161.5	162.5	1
m162.089	162.089	162.01	162.167	1
m162.908	162.908	162.839	162.939	1
m162.969	162.969	162.939	163.002	1
Nominale 163	163	162.5	163.5	1
(C10H10O2)H+	163.073	163.002	163.076	1
m163.142	163.142	163.076	163.208	0.76
m163.876	163.876	163.792	163.959	1
m163.968	163.968	163.959	163.979	1
Nominale 164	164	163.5	164.5	1
m164.07	164.07	163.979	164.109	1
m164.149	164.149	164.109	164.23	1
m164.902	164.902	164.841	164.903	1
m164.964	164.964	164.903	165.022	1
Nominale 165	165	164.5	165.5	1
(C10H12O2)H+	165.089	165.022	165.099	0.71
m165.158	165.158	165.099	165.218	1
m165.869	165.869	165.8	165.937	1
Nominale 166	166	165.5	166.5	1
m166.07	166.07	165.992	166.094	1
m166.163	166.163	166.094	166.233	1
Nominale 167	167	166.5	167.5	1
m167.052	167.052	166.993	167.11	1
m167.174	167.174	167.115	167.234	1
m167.866	167.866	167.808	167.924	1
Nominale 168	168	167.5	168.5	1
m168.051	168.051	167.991	168.112	1
m168.18	168.18	168.119	168.241	1
Nominale 169	169	168.5	169.5	1
m169.033	169.033	168.971	169.094	1
m169.189	169.189	169.127	169.25	1
Nominale 170	170	169.5	170.5	1
m170.032	170.032	169.956	170.109	1
m170.191	170.191	170.115	170.267	1
Nominale 171	171	170.5	171.5	1
m171.025	171.025	170.933	171.066	1
m171.108	171.108	171.066	171.206	1
Nominale 172	172	171.5	172.5	1
m172.025	172.025	171.916	172.061	1
m172.096	172.096	172.061	172.205	1
m172.952	172.952	172.89	173.013	1
Nominale 173	173	172.5	173.5	1
m173.145	173.145	173.083	173.208	1
m173.956	173.956	173.886	174.026	1
Nominale 174	174	173.5	174.5	1
m174.147	174.147	174.073	174.221	1
m174.949	174.949	174.887	175.011	1
Nominale 175	175	174.5	175.5	1
m175.141	175.141	175.077	175.205	1
m175.953	175.953	175.885	176.022	1
Nominale 176	176	175.5	176.5	1
m176.041	176.041	176.022	176.113	1
m176.142	176.142	176.113	176.216	1
m176.949	176.949	176.877	177.021	1
Nominale 177	177	176.5	177.5	1
m177.052	177.052	177.021	177.084	1
m177.157	177.157	177.084	177.229	0.74
m177.951	177.951	177.868	177.969	1
Nominale 178	178	177.5	178.5	1
(C10H10O3)+	178.06	177.969	178.08	1
m178.161	178.161	178.08	178.243	1
m178.961	178.961	178.894	179.028	1
Nominale 179	179	178.5	179.5	1
m179.1	179.1	179.029	179.108	1
m179.173	179.173	179.108	179.237	1
m179.889	179.889	179.818	179.96	1
Nominale 180	180	179.5	180.5	1
m180.101	180.101	180.023	180.109	1
m180.18	180.18	180.109	180.25	1
m180.886	180.886	180.823	180.949	1
Nominale 181	181	180.5	181.5	1
m181.062	181.062	180.997	181.127	1
m181.19	181.19	181.127	181.255	1
m181.904	181.904	181.825	181.982	1
Nominale 182	182	181.5	182.5	1
m182.063	182.063	181.984	182.142	1
m182.196	182.196	182.142	182.274	1
Nominale 183	183	182.5	183.5	1
m183.085	183.085	182.997	183.127	1
m183.206	183.206	183.127	183.285	1
Nominale 184	184	183.5	184.5	1
m184.087	184.087	183.993	184.12	1
m184.207	184.207	184.12	184.294	1
Nominale 185	185	184.5	185.5	1
m185.13	185.13	184.947	185.312	1
Nominale 186	186	185.5	186.5	1
m186.093	186.093	185.934	186.251	1
m186.97	186.97	186.88	187.061	1
Nominale 187	187	186.5	187.5	1
m187.076	187.076	187.061	187.115	1
m187.155	187.155	187.115	187.247	1
m187.975	187.975	187.874	188.022	1
Nominale 188	188	187.5	188.5	1
m188.068	188.068	188.022	188.108	1
m188.147	188.147	188.108	188.25	1
m188.969	188.969	188.89	189.047	1
Nominale 189	189	188.5	189.5	1
m189.099	189.099	189.047	189.125	1
m189.15	189.15	189.125	189.228	1
m189.975	189.975	189.907	190.044	1
Nominale 190	190	189.5	190.5	1
m190.084	190.084	190.044	190.157	1
m190.159	190.159	190.157	190.229	1
m190.962	190.962	190.894	191.031	1
Nominale 191	191	190.5	191.5	1
m191.172	191.172	191.104	191.241	1
m191.971	191.971	191.902	192.041	1
Nominale 192	192	191.5	192.5	1
m192.176	192.176	192.106	192.245	1
m192.96	192.96	192.892	193.029	1
Nominale 193	193	192.5	193.5	1
m193.187	193.187	193.119	193.256	1
m193.968	193.968	193.898	194.038	1
Nominale 194	194	193.5	194.5	1
m194.12	194.12	194.042	194.125	1
m194.195	194.195	194.125	194.265	1
m194.954	194.954	194.867	195.041	1
Nominale 195	195	194.5	195.5	1
m195.202	195.202	195.112	195.292	1
m195.877	195.877	195.783	195.919	1
m195.96	195.96	195.919	196.023	1
Nominale 196	196	195.5	196.5	1
m196.124	196.124	196.023	196.168	1
m196.212	196.212	196.168	196.308	1
m196.88	196.88	196.793	196.965	1
Nominale 197	197	196.5	197.5	1
m197.058	197.058	196.965	197.131	1
m197.219	197.219	197.131	197.308	1
m197.883	197.883	197.78	197.961	1
Nominale 198	198	197.5	198.5	1
m198.07	198.07	197.961	198.179	1
m198.222	198.222	198.179	198.327	1
Nominale 199	199	198.5	199.5	1
m199.071	199.071	198.999	199.143	1
m199.16	199.16	199.143	199.241	1
Nominale 200	200	199.5	200.5	1
m200.075	200.075	199.994	200.156	1
m200.17	200.171	200.156	200.258	1
Nominale 201	201	200.5	201.5	1
m201.045	201.045	200.933	201.065	1
m201.171	201.171	201.065	201.278	1
m201.979	201.979	201.866	202.023	1
Nominale 202	202	201.5	202.5	1
m202.066	202.066	202.023	202.119	1
m202.171	202.171	202.119	202.287	1
Nominale 203	203	202.5	203.5	1
m203.171	203.171	203.07	203.271	1
m203.991	203.991	203.902	204.08	1
Nominale 204	204	203.5	204.5	1
m204.175	204.175	204.082	204.267	1
m204.979	204.979	204.904	205.008	1
Nominale 205	205	204.5	205.5	1
m205.082	205.082	205.008	205.113	1
m205.186	205.186	205.113	205.26	2.55
m205.988	205.988	205.907	206.068	1
Nominale 206	206	205.5	206.5	1
m206.085	206.085	206.068	206.112	1
m206.192	206.192	206.112	206.272	1
Nominale 207	207	206.5	207.5	1
m207.028	207.028	206.941	207.116	1
m207.202	207.202	207.121	207.282	1
m207.873	207.873	207.795	207.952	1
Nominale 208	208	207.5	208.5	1
m208.042	208.042	207.954	208.077	1
m208.112	208.112	208.077	208.126	1
m208.206	208.206	208.126	208.287	1
Nominale 209	209	208.5	209.5	1
m209	209	208.901	209.099	1
m209.141	209.141	209.099	209.179	1
m209.217	209.217	209.179	209.309	1
Nominale 210	210	209.5	210.5	1
m210.004	210.004	209.911	210.024	1
m210.121	210.121	210.024	210.14	1
m210.226	210.226	210.14	210.312	1
m210.982	210.982	210.891	211.04	1
Nominale 211	211	210.5	211.5	1
m211.14	211.14	211.04	211.147	1
m211.235	211.235	211.147	211.322	1
Nominale 212	212	211.5	212.5	1
m212.115	212.115	212.002	212.134	1
m212.236	212.236	212.134	212.339	1
m212.904	212.904	212.695	212.957	1
Nominale 213	213	212.5	213.5	1
m213.162	213.162	212.957	213.367	1
m213.88	213.88	213.777	213.976	1
Nominale 214	214	213.5	214.5	1
m214.084	214.084	213.976	214.192	1
m214.89	214.89	214.782	214.946	1
Nominale 215	215	214.5	215.5	1
m215.069	215.069	214.946	215.125	1
m215.181	215.181	215.125	215.293	1
m215.897	215.897	215.783	215.951	1
Nominale 216	216	215.5	216.5	1
m216.005	216.005	215.951	216.043	1
m216.081	216.081	216.043	216.13	1
m216.178	216.178	216.13	216.294	1
Nominale 217	217	216.5	217.5	1
m217.183	217.183	217.073	217.292	1
m217.994	217.994	217.873	218.08	1
Nominale 218	218	217.5	218.5	1
m218.19	218.19	218.08	218.301	1
Nominale 219	219	218.5	219.5	1
m219.051	219.051	218.97	219.121	1
m219.202	219.202	219.121	219.283	1
Nominale 220	220	219.5	220.5	1
m220.061	220.061	219.952	220.104	1
m220.205	220.205	220.104	220.305	1
Nominale 221	221	220.5	221.5	1
m221.047	221.047	220.935	221.113	1
m221.217	221.217	221.113	221.322	1
Nominale 222	222	221.5	222.5	1
m222.151	222.151	222.06	222.188	1
m222.225	222.225	222.188	222.314	1
Nominale 223	223	222.5	223.5	1
m223.057	223.057	222.978	223.135	1
m223.232	223.232	223.154	223.31	1
Nominale 224	224	223.5	224.5	1
m224.058	224.058	223.979	224.138	1
m224.241	224.241	224.162	224.32	1
Nominale 225	225	224.5	225.5	1
m225.036	225.036	224.956	225.116	1
m225.246	225.246	225.166	225.326	1
Nominale 226	226	225.5	226.5	1
m226.038	226.038	225.956	226.12	1
m226.255	226.255	226.174	226.337	1
Nominale 227	227	226.5	227.5	1
m227.022	227.022	226.94	227.105	1
m227.173	227.173	227.105	227.264	1
Nominale 228	228	227.5	228.5	1
m228.02	228.02	227.937	228.103	1
m228.191	228.191	228.103	228.28	1
Nominale 229	229	228.5	229.5	1
m229.005	229.005	228.913	229.097	1
m229.198	229.198	229.103	229.292	1
Nominale 230	230	229.5	230.5	1
m230.007	230.007	229.933	230.08	1
m230.199	230.199	230.126	230.272	1
Nominale 231	231	230.5	231.5	1
m231.01	231.01	230.905	231.115	1
m231.202	231.202	231.115	231.311	1
Nominale 232	232	231.5	232.5	1
m232.003	232.003	231.921	232.084	1
m232.202	232.202	232.117	232.287	1
Nominale 233	233	232.5	233.5	1
m233.01	233.01	232.925	233.094	1
m233.218	233.218	233.134	233.302	1
m234	234	233.916	234.084	1
Nominale 234	234	233.5	234.5	1
m234.221	234.221	234.137	234.306	1
Nominale 235	235	234.5	235.5	1
m235.009	235.009	234.893	235.113	1
m235.227	235.227	235.113	235.341	1
Nominale 236	236	235.5	236.5	1
m236.031	236.031	235.893	236.109	1
m236.237	236.237	236.109	236.364	1
Nominale 237	237	236.5	237.5	1
m237.245	237.245	237.126	237.364	1
Nominale 238	238	237.5	238.5	1
m238.122	238.122	238.01	238.148	1
m238.251	238.251	238.148	238.355	1
m238.997	238.997	238.881	239.043	1
Nominale 239	239	238.5	239.5	1
m239.09	239.09	239.043	239.145	1
m239.258	239.258	239.145	239.371	1
Nominale 240	240	239.5	240.5	1
m240.1	240.1	239.964	240.134	1
m240.26	240.261	240.134	240.387	1
Nominale 241	241	240.5	241.5	1
m241.068	241.068	240.885	241.132	1
m241.195	241.195	241.132	241.381	1
Nominale 242	242	241.5	242.5	1
m242.131	242.131	241.988	242.274	1
Nominale 243	243	242.5	243.5	1
m243.048	243.048	242.906	243.081	1
m243.213	243.213	243.081	243.344	1
Nominale 244	244	243.5	244.5	1
m244.025	244.025	243.895	244.156	1
m244.212	244.212	244.156	244.344	1
Nominale 245	245	244.5	245.5	1
m245.022	245.022	244.925	245.118	1
m245.219	245.219	245.121	245.316	1
Nominale 246	246	245.5	246.5	1
m246.014	246.014	245.908	246.121	1
m246.22	246.22	246.121	246.325	1
Nominale 247	247	246.5	247.5	1
m247.006	247.006	246.91	247.101	1
m247.23	247.23	247.134	247.326	1
Nominale 248	248	247.5	248.5	1
m248.006	248.006	247.898	248.114	1
m248.237	248.237	248.129	248.346	1
m248.981	248.981	248.86	249.054	1
Nominale 249	249	248.5	249.5	1
m249.178	249.178	249.054	249.302	1
m249.989	249.989	249.897	250.08	1
Nominale 250	250	249.5	250.5	1
m250.179	250.179	250.088	250.214	1
m250.25	250.25	250.214	250.343	1
m250.982	250.982	250.882	251.081	1
Nominale 251	251	250.5	251.5	1
m251.168	251.168	251.081	251.215	1
m251.261	251.261	251.215	251.361	1
m251.987	251.987	251.883	252.05	1
Nominale 252	252	251.5	252.5	1
m252.158	252.158	252.05	252.167	1
m252.27	252.27	252.167	252.373	1
m252.984	252.984	252.87	253.098	1
Nominale 253	253	252.5	253.5	1
m253.281	253.281	253.168	253.393	1
Nominale 254	254	253.5	254.5	1
m254.186	254.186	254.061	254.235	1
m254.284	254.284	254.235	254.399	1
m254.999	254.999	254.838	255.053	1
Nominale 255	255	254.5	255.5	1
m255.218	255.218	255.053	255.382	1
m255.999	255.999	255.898	256.1	1
Nominale 256	256	255.5	256.5	1
m256.226	256.226	256.121	256.331	1
Nominale 257	257	256.5	257.5	1
m257.014	257.014	256.924	257.104	1
m257.238	257.238	257.148	257.328	1
Nominale 258	258	257.5	258.5	1
m258.016	258.015	257.922	258.109	1
m258.235	258.235	258.142	258.327	1
Nominale 259	259	258.5	259.5	1
m259.013	259.013	258.922	259.104	1
m259.232	259.232	259.14	259.323	1
Nominale 260	260	259.5	260.5	1
m260.012	260.012	259.918	260.106	1
m260.238	260.238	260.145	260.332	1
Nominale 261	261	260.5	261.5	1
m261.007	261.007	260.912	261.101	1
m261.247	261.247	261.153	261.342	1
Nominale 262	262	261.5	262.5	1
m262.009	262.009	261.894	262.124	1
m262.244	262.244	262.124	262.365	1
Nominale 263	263	262.5	263.5	1
m263.018	263.018	262.887	263.138	1
m263.263	263.263	263.138	263.388	1
Nominale 264	264	263.5	264.5	1
m264.011	264.011	263.894	264.127	1
m264.129	264.129	264.127	264.155	1
m264.182	264.182	264.155	264.223	1
m264.264	264.264	264.223	264.375	1
Nominale 265	265	264.5	265.5	1
m265.027	265.027	264.91	265.078	1
m265.129	265.129	265.078	265.237	1
m265.277	265.277	265.237	265.383	1
Nominale 266	266	265.5	266.5	1
m266.001	266.001	265.874	266.065	1
m266.13	266.13	266.065	266.162	1
m266.284	266.284	266.162	266.406	1
m266.988	266.988	266.877	267.098	1
Nominale 267	267	266.5	267.5	1
m267.291	267.291	267.179	267.402	1
m267.995	267.995	267.867	268.122	1
Nominale 268	268	267.5	268.5	1
m268.297	268.297	268.17	268.424	1
m268.981	268.981	268.861	269.101	1
Nominale 269	269	268.5	269.5	1
m269.247	269.248	269.116	269.379	1
m269.985	269.985	269.846	270.096	1
Nominale 270	270	269.5	270.5	1
m270.237	270.237	270.096	270.379	1
Nominale 271	271	270.5	271.5	1
m271.027	271.027	270.928	271.125	1
m271.25	271.25	271.153	271.348	1
Nominale 272	272	271.5	272.5	1
m272.029	272.029	271.92	272.137	1
m272.254	272.254	272.149	272.359	1
Nominale 273	273	272.5	273.5	1
m273.021	273.021	272.906	273.137	1
m273.251	273.251	273.137	273.366	1
Nominale 274	274	273.5	274.5	1
m274.024	274.024	273.898	274.15	1
m274.158	274.158	274.15	274.202	1
m274.245	274.245	274.202	274.368	1
Nominale 275	275	274.5	275.5	1
m275.015	275.015	274.905	275.125	1
m275.13	275.13	275.125	275.147	1
m275.254	275.254	275.147	275.362	1
Nominale 276	276	275.5	276.5	1
m276.007	276.007	275.882	276.133	1
m276.145	276.145	276.133	276.203	1
m276.262	276.262	276.203	276.385	1
Nominale 277	277	276.5	277.5	1
m277.068	277.068	276.968	277.167	1
m277.272	277.272	277.172	277.371	1
Nominale 278	278	277.5	278.5	1
m278.074	278.074	277.966	278.182	1
m278.282	278.282	278.182	278.39	1
Nominale 279	279	278.5	279.5	1
m279.132	279.132	278.929	279.212	1
m279.291	279.291	279.212	279.458	1
Nominale 280	280	279.5	280.5	1
m280.147	280.147	279.95	280.222	1
m280.297	280.297	280.222	280.469	1
Nominale 281	281	280.5	281.5	1
m281.046	281.046	280.936	281.156	1
m281.311	281.311	281.202	281.42	1
Nominale 282	282	281.5	282.5	1
m282.041	282.041	281.92	282.163	1
m282.189	282.189	282.163	282.193	1
m282.314	282.314	282.193	282.434	1
Nominale 283	283	282.5	283.5	1
m283.023	283.023	282.92	283.126	1
m283.244	283.244	283.137	283.351	1
Nominale 284	284	283.5	284.5	1
m284.022	284.022	283.912	284.132	1
m284.254	284.254	284.14	284.368	1
Nominale 285	285	284.5	285.5	1
m285.01	285.01	284.894	285.126	1
m285.258	285.258	285.142	285.374	1
Nominale 286	286	285.5	286.5	1
m286.009	286.009	285.886	286.131	1
m286.254	286.254	286.132	286.376	1
m286.991	286.991	286.847	287.122	1
Nominale 287	287	286.5	287.5	1
m287.258	287.258	287.122	287.394	1
Nominale 288	288	287.5	288.5	1
m288.004	288.004	287.859	288.126	1
m288.267	288.267	288.126	288.407	1
Nominale 289	289	288.5	289.5	1
m289.014	289.014	288.902	289.02	1
m289.026	289.026	289.02	289.086	1
m289.191	289.191	289.086	289.228	1
m289.265	289.265	289.228	289.372	1
Nominale 290	290	289.5	290.5	1
m290.024	290.024	289.884	290.051	1
m290.188	290.188	290.051	290.235	1
m290.281	290.281	290.235	290.412	1
Nominale 291	291	290.5	291.5	1
m291.073	291.073	290.923	291.143	1
m291.286	291.286	291.143	291.429	1
Nominale 292	292	291.5	292.5	1
m292.062	292.062	291.9	292.224	1
m292.292	292.292	292.224	292.447	1
Nominale 293	293	292.5	293.5	1
m293.098	293.098	292.923	293.273	1
m293.308	293.308	293.273	293.468	1
Nominale 294	294	293.5	294.5	1
m294.055	294.055	293.916	294.19	1
m294.321	294.321	294.19	294.452	1
Nominale 295	295	294.5	295.5	1
m295.066	295.066	294.931	295.189	1
m295.318	295.318	295.189	295.447	1
Nominale 296	296	295.5	296.5	1
m296.057	296.057	295.919	296.195	1
m296.332	296.332	296.198	296.466	1
Nominale 297	297	296.5	297.5	1
m297.071	297.071	296.966	297.176	1
m297.265	297.265	297.176	297.375	1
Nominale 298	298	297.5	298.5	1
m298.074	298.074	297.968	298.179	1
m298.25	298.25	298.179	298.359	1
Nominale 299	299	298.5	299.5	1
m299.052	299.052	298.955	299.149	1
m299.268	299.268	299.177	299.36	1
Nominale 300	300	299.5	300.5	1
m300.051	300.051	299.946	300.157	1
m300.271	300.271	300.169	300.373	1
Nominale 301	301	300.5	301.5	1
m301.048	301.048	300.939	301.157	1
m301.276	301.276	301.168	301.383	1
Nominale 302	302	301.5	302.5	1
m302.046	302.046	301.936	302.156	1
m302.279	302.279	302.171	302.387	1
Nominale 303	303	302.5	303.5	1
m303.038	303.038	302.914	303.163	1
m303.291	303.291	303.168	303.413	1
Nominale 304	304	303.5	304.5	1
m304.036	304.036	303.891	304.181	1
m304.296	304.296	304.181	304.438	1
Nominale 305	305	304.5	305.5	1
m305.021	305.021	304.867	305.151	1
m305.301	305.301	305.151	305.451	1
Nominale 306	306	305.5	306.5	1
m306.072	306.072	305.926	306.174	1
m306.314	306.314	306.174	306.454	1
Nominale 307	307	306.5	307.5	1
m307.029	307.029	306.884	307.061	1
m307.21	307.21	307.061	307.267	1
m307.324	307.324	307.267	307.464	1
Nominale 308	308	307.5	308.5	1
m308.061	308.061	307.928	308.122	1
m308.184	308.183	308.122	308.202	1
m308.33	308.33	308.202	308.458	1
Nominale 309	309	308.5	309.5	1
m309.058	309.058	308.91	309.193	1
m309.337	309.337	309.193	309.48	1
Nominale 310	310	309.5	310.5	1
m310.046	310.046	309.911	310.108	1
m310.17	310.17	310.108	310.207	1
m310.34	310.34	310.207	310.474	1
Nominale 311	311	310.5	311.5	1
m311.051	311.051	310.877	311.096	1
m311.275	311.275	311.096	311.454	1
Nominale 312	312	311.5	312.5	1
m312.023	312.023	311.894	312.143	1
m312.274	312.274	312.143	312.405	1
Nominale 313	313	312.5	313.5	1
m313.122	313.122	312.966	313.279	1
m313.279	313.279	313.279	313.429	1
Nominale 314	314	313.5	314.5	1
m314.02	314.02	313.884	314.061	1
m314.102	314.102	314.061	314.14	1
m314.278	314.278	314.14	314.416	1
Nominale 315	315	314.5	315.5	1
m315.069	315.069	314.929	315.152	1
m315.289	315.289	315.152	315.427	1
Nominale 316	316	315.5	316.5	1
m316.054	316.054	315.91	316.197	1
m316.295	316.295	316.197	316.433	1
Nominale 317	317	316.5	317.5	1
m317.068	317.068	316.933	317.171	1
m317.303	317.303	317.171	317.436	1
Nominale 318	318	317.5	318.5	1
m318.035	318.035	317.885	318.185	1
m318.311	318.311	318.185	318.457	1
Nominale 319	319	318.5	319.5	1
m319.055	319.055	318.917	319.108	1
m319.161	319.161	319.108	319.185	1
m319.325	319.325	319.185	319.464	1
Nominale 320	320	319.5	320.5	1
m320.058	320.058	319.922	320.185	1
m320.323	320.323	320.185	320.46	1
Nominale 321	321	320.5	321.5	1
m321.043	321.043	320.903	321.064	1
m321.084	321.084	321.064	321.193	1
m321.339	321.339	321.193	321.484	1
Nominale 322	322	321.5	322.5	1
m322.087	322.087	321.959	322.144	1
m322.201	322.201	322.144	322.218	1
m322.35	322.35	322.218	322.481	1
Nominale 323	323	322.5	323.5	1
m323.055	323.055	322.906	323.203	1
m323.355	323.354	323.207	323.502	1
Nominale 324	324	323.5	324.5	1
m324.049	324.049	323.935	324.163	1
m324.35	324.35	324.24	324.46	1
Nominale 325	325	324.5	325.5	1
m325.047	325.047	324.912	325.183	1
m325.296	325.296	325.183	325.436	1
Nominale 326	326	325.5	326.5	1
m326.052	326.052	325.935	326.168	1
m326.293	326.293	326.181	326.405	1
Nominale 327	327	326.5	327.5	1
m327.009	327.009	326.856	327.163	1
m327.289	327.289	327.163	327.442	1
Nominale 328	328	327.5	328.5	1
m328.038	328.038	327.922	328.153	1
m328.299	328.299	328.188	328.411	1
Nominale 329	329	328.5	329.5	1
m329.006	329.006	328.868	329.144	1
m329.305	329.305	329.17	329.44	1
Nominale 330	330	329.5	330.5	1
m330.033	330.033	329.913	330.152	1
m330.309	330.309	330.194	330.424	1
Nominale 331	331	330.5	331.5	1
m331.006	331.006	330.858	331.154	1
m331.318	331.318	331.175	331.461	1
Nominale 332	332	331.5	332.5	1
m332.019	332.019	331.886	332.153	1
m332.324	332.324	332.193	332.455	1
Nominale 333	333	332.5	333.5	1
m333.034	333.034	332.894	333.173	1
m333.332	333.332	333.194	333.469	1
Nominale 334	334	333.5	334.5	1
m334.026	334.026	333.908	334.145	1
m334.348	334.348	334.234	334.463	1
m334.901	334.901	334.767	334.965	1
Nominale 335	335	334.5	335.5	1
m335.028	335.029	334.965	335.164	1
m335.355	335.355	335.22	335.489	1
Nominale 336	336	335.5	336.5	1
m336.024	336.024	335.899	336.149	1
m336.359	336.359	336.237	336.482	1
m336.908	336.908	336.767	336.972	1
Nominale 337	337	336.5	337.5	1
m337.036	337.036	336.972	337.179	1
m337.368	337.368	337.226	337.51	1
Nominale 338	338	337.5	338.5	1
m338.035	338.035	337.881	338.035	1
m338.185	338.185	338.035	338.212	1
m338.364	338.364	338.212	338.515	1
m338.897	338.897	338.757	338.905	1
Nominale 339	339	338.5	339.5	1
m339.051	339.051	338.905	339.196	1
m339.306	339.306	339.196	339.452	1
Nominale 340	340	339.5	340.5	1
m340.06	340.06	339.943	340.178	1
m340.29	340.29	340.178	340.408	1
Nominale 341	341	340.5	341.5	1
m341.039	341.039	340.843	341.235	1
m341.305	341.305	341.235	341.492	1
Nominale 342	342	341.5	342.5	1
m342.051	342.051	341.93	342.172	1
m342.314	342.314	342.2	342.428	1
Nominale 343	343	342.5	343.5	1
m343.051	343.051	342.929	343.173	1
m343.316	343.316	343.196	343.436	1
Nominale 344	344	343.5	344.5	1
m344.047	344.047	343.926	344.168	1
m344.324	344.324	344.208	344.439	1
Nominale 345	345	344.5	345.5	1
m345.039	345.039	344.915	345.162	1
m345.329	345.329	345.209	345.449	1
Nominale 346	346	345.5	346.5	1
m346.047	346.047	345.915	346.179	1
m346.339	346.339	346.212	346.465	1
Nominale 347	347	346.5	347.5	1
m347.035	347.035	346.897	347.174	1
m347.347	347.347	347.212	347.482	1
Nominale 348	348	347.5	348.5	1
m348.018	348.018	347.845	348.19	1
m348.355	348.355	348.19	348.52	1
Nominale 349	349	348.5	349.5	1
m349.036	349.036	348.892	349.18	1
m349.365	349.365	349.22	349.511	1
Nominale 350	350	349.5	350.5	1
m350.102	350.102	349.939	350.265	1
m350.373	350.373	350.265	350.533	1
m350.929	350.929	350.785	351.001	1
Nominale 351	351	350.5	351.5	1
m351.073	351.073	351.001	351.226	1
m351.375	351.375	351.227	351.523	1
Nominale 352	352	351.5	352.5	1
m352.096	352.096	351.938	352.164	1
m352.232	352.232	352.164	352.237	1
m352.393	352.393	352.237	352.549	1
m352.917	352.917	352.768	352.93	1
Nominale 353	353	352.5	353.5	1
m353.086	353.086	352.93	353.242	1
m353.312	353.312	353.242	353.466	1
Nominale 354	354	353.5	354.5	1
m354.074	354.074	353.963	354.186	1
m354.206	354.206	354.186	354.249	1
m354.292	354.291	354.249	354.401	1
Nominale 355	355	354.5	355.5	1
m355.051	355.051	354.926	355.176	1
Nominale 356	356	355.5	356.5	1
m356.057	356.057	355.934	356.181	1
Nominale 357	357	356.5	357.5	1
m357.049	357.049	356.921	357.178	1
m357.331	357.331	357.21	357.452	1
Nominale 358	358	357.5	358.5	1
m358.051	358.051	357.913	358.189	1
m358.342	358.342	358.21	358.474	1
Nominale 359	359	358.5	359.5	1
m359.028	359.028	358.896	359.16	1
m359.35	359.35	359.223	359.476	1
Nominale 360	360	359.5	360.5	1
m360.025	360.025	359.869	360.181	1
m360.343	360.343	360.195	360.49	1
Nominale 361	361	360.5	361.5	1
m361.022	361.022	360.871	361.173	1
m361.206	361.206	361.173	361.22	1
m361.365	361.365	361.22	361.51	1
Nominale 362	362	361.5	362.5	1
m362.062	362.062	361.894	362.229	1
m362.381	362.381	362.229	362.541	1
Nominale 363	363	362.5	363.5	1
m363.029	363.029	362.881	363.177	1
m363.382	363.382	363.235	363.529	1
Nominale 364	364	363.5	364.5	1
m364.034	364.034	363.891	364.049	1
m364.065	364.065	364.049	364.207	1
m364.392	364.392	364.247	364.537	1
Nominale 365	365	364.5	365.5	1
m365.063	365.063	364.928	365.198	1
m365.396	365.396	365.255	365.536	1
Nominale 366	366	365.5	366.5	1
m366.097	366.097	365.97	366.224	1
m366.4	366.4	366.272	366.529	1
Nominale 367	367	366.5	367.5	1
m367.085	367.085	366.93	367.239	1
m367.316	367.316	367.239	367.47	1
Nominale 368	368	367.5	368.5	1
m368.075	368.075	367.939	368.211	1
m368.227	368.227	368.211	368.271	1
m368.314	368.314	368.271	368.446	1
Nominale 369	369	368.5	369.5	1
m369.096	369.096	368.937	369.161	1
m369.226	369.226	369.161	369.273	1
m369.319	369.319	369.273	369.474	1
Nominale 370	370	369.5	370.5	1
m370.08	370.08	369.931	370.229	1
m370.337	370.337	370.229	370.482	1
Nominale 371	371	370.5	371.5	1
m371.087	371.087	370.957	371.216	1
Nominale 372	372	371.5	372.5	1
m372.086	372.086	371.955	372.217	1
m372.344	372.344	372.219	372.468	1
Nominale 373	373	372.5	373.5	1
m373.07	373.07	372.938	373.202	1
m373.358	373.358	373.233	373.483	1
Nominale 374	374	373.5	374.5	1
m374.068	374.068	373.934	374.201	1
m374.365	374.365	374.24	374.489	1
Nominale 375	375	374.5	375.5	1
m375.062	375.062	374.926	375.199	1
m375.381	375.381	375.252	375.51	1
Nominale 376	376	375.5	376.5	1
m376.073	376.073	375.923	376.224	1
m376.378	376.378	376.231	376.525	1
Nominale 377	377	376.5	377.5	1
m377.071	377.071	376.922	377.221	1
m377.397	377.397	377.246	377.547	1
Nominale 378	378	377.5	378.5	1
m378.084	378.084	377.937	378.23	1
m378.397	378.397	378.247	378.546	1
Nominale 379	379	378.5	379.5	1
m379.083	379.083	378.957	379.21	1
m379.41	379.41	379.275	379.544	1
Nominale 380	380	379.5	380.5	1
m380.403	380.403	380.27	380.535	1
Nominale 381	381	380.5	381.5	1
m381.096	381.096	380.946	381.245	1
m381.365	381.365	381.245	381.513	1
Nominale 382	382	381.5	382.5	1
m382.095	382.095	381.997	382.193	1
m382.343	382.343	382.245	382.441	1
Nominale 383	383	382.5	383.5	1
m383.087	383.087	382.927	383.247	1
m383.322	383.322	383.247	383.482	1
Nominale 384	384	383.5	384.5	1
m384.089	384.089	383.973	384.205	1
m384.325	384.325	384.207	384.443	1
Nominale 385	385	384.5	385.5	1
m385.11	385.11	384.972	385.217	1
m385.355	385.355	385.217	385.493	1
Nominale 386	386	385.5	386.5	1
m386.07	386.07	385.939	386.099	1
m386.128	386.128	386.099	386.228	1
m386.364	386.364	386.228	386.501	1
Nominale 387	387	386.5	387.5	1
m387.112	387.112	386.97	387.255	1
m387.375	387.375	387.255	387.514	1
Nominale 388	388	387.5	388.5	1
m388.115	388.115	387.967	388.262	1
m388.382	388.382	388.262	388.526	1
Nominale 389	389	388.5	389.5	1
m389.105	389.105	388.958	389.109	1
m389.248	389.248	389.109	389.258	1
m389.4	389.4	389.258	389.542	1
Nominale 390	390	389.5	390.5	1
m390.089	390.089	389.949	390.229	1
m390.401	390.401	390.262	390.54	1
Nominale 391	391	390.5	391.5	1
m391.095	391.095	390.947	391.113	1
m391.266	391.266	391.113	391.335	1
m391.404	391.404	391.335	391.559	1
Nominale 392	392	391.5	392.5	1
m392.067	392.067	391.917	392.126	1
m392.278	392.278	392.126	392.345	1
m392.413	392.413	392.345	392.568	1
Nominale 393	393	392.5	393.5	1
m393.434	393.434	393.274	393.593	1
Nominale 394	394	393.5	394.5	1
m394.099	394.099	393.943	394.255	1
m394.432	394.433	394.28	394.585	1
Nominale 395	395	394.5	395.5	1
m395.085	395.085	394.939	395.231	1
m395.369	395.369	395.231	395.514	1
Nominale 396	396	395.5	396.5	1
m396.093	396.093	395.947	396.238	1
m396.36	396.36	396.238	396.499	1
Nominale 397	397	396.5	397.5	1
m397.073	397.073	396.944	397.201	1
m397.348	397.348	397.218	397.477	1
Nominale 398	398	397.5	398.5	1
m398.079	398.079	397.963	398.194	1
m398.372	398.372	398.256	398.488	1
Nominale 399	399	398.5	399.5	1
m399.069	399.069	398.929	399.208	1
m399.38	399.38	399.239	399.522	1
Nominale 400	400	399.5	400.5	1
m400.072	400.072	399.937	400.208	1
m400.389	400.389	400.252	400.526	1
Nominale 401	401	400.5	401.5	1
m401.056	401.056	400.909	401.204	1
m401.391	401.391	401.242	401.541	1
Nominale 402	402	401.5	402.5	1
m402.054	402.054	401.931	402.177	1
m402.395	402.395	402.27	402.52	1
m402.935	402.935	402.803	402.951	1
m402.968	402.968	402.951	403.004	1
Nominale 403	403	402.5	403.5	1
m403.04	403.04	403.004	403.172	1
m403.421	403.421	403.284	403.557	1
Nominale 404	404	403.5	404.5	1
m404.067	404.067	403.928	404.206	1
m404.418	404.418	404.279	404.556	1
m404.946	404.946	404.795	405.005	1
Nominale 405	405	404.5	405.5	1
m405.065	405.065	405.005	405.216	1
m405.432	405.432	405.275	405.59	1
Nominale 406	406	405.5	406.5	1
m406.054	406.054	405.899	406.063	1
m406.073	406.073	406.063	406.227	1
m406.436	406.436	406.278	406.594	1
Nominale 407	407	406.5	407.5	1
m407.438	407.438	407.297	407.579	1
Nominale 408	408	407.5	408.5	1
m408.105	408.105	407.954	408.255	1
m408.439	408.439	408.29	408.587	1
Nominale 409	409	408.5	409.5	1
m409.107	409.107	408.983	409.231	1
m409.363	409.363	409.242	409.386	1
m409.409	409.409	409.386	409.531	1
Nominale 410	410	409.5	410.5	1
m410.097	410.097	409.949	410.244	1
m410.358	410.358	410.244	410.497	1
m410.946	410.946	410.824	410.975	1
Nominale 411	411	410.5	411.5	1
m411.101	411.101	410.975	411.226	1
m411.372	411.372	411.246	411.497	1
Nominale 412	412	411.5	412.5	1
m412.08	412.08	411.954	412.205	1
m412.374	412.374	412.248	412.499	1
Nominale 413	413	412.5	413.5	1
m413.064	413.064	412.933	413.071	1
m413.077	413.077	413.071	413.208	1
m413.385	413.385	413.251	413.52	1
Nominale 414	414	413.5	414.5	1
m414.021	414.021	413.891	414.051	1
m414.081	414.081	414.051	414.21	1
m414.399	414.399	414.265	414.533	1
Nominale 415	415	414.5	415.5	1
m415.026	415.026	414.822	415.23	1
m415.417	415.417	415.23	415.612	1
Nominale 416	416	415.5	416.5	1
m416.027	416.027	415.862	416.191	1
m416.41	416.41	416.251	416.569	1
Nominale 417	417	416.5	417.5	1
m417.059	417.059	416.879	417.239	1
Nominale 418	418	417.5	418.5	1
m418.057	418.057	417.891	418.224	1
m418.435	418.435	418.274	418.596	1
Nominale 419	419	418.5	419.5	1
m419.056	419.056	418.893	419.219	1
m419.303	419.303	419.219	419.37	1
m419.437	419.437	419.37	419.597	1
Nominale 420	420	419.5	420.5	1
m420.058	420.058	419.895	420.22	1
m420.444	420.444	420.279	420.608	1
Nominale 421	421	420.5	421.5	1
m421.038	421.038	420.905	421.17	1
m421.452	421.452	421.31	421.594	1
Nominale 422	422	421.5	422.5	1
m422.06	422.06	421.915	422.205	1
m422.46	422.46	422.31	422.61	1
Nominale 423	423	422.5	423.5	1
m423.048	423.048	422.942	423.154	1
m423.424	423.424	423.317	423.531	1
Nominale 424	424	423.5	424.5	1
m424.09	424.09	423.998	424.183	1
m424.398	424.398	424.305	424.491	1
Nominale 425	425	424.5	425.5	1
m425.149	425.149	425.037	425.262	1
m425.383	425.383	425.268	425.498	1
Nominale 426	426	425.5	426.5	1
m426.083	426.083	425.974	426.193	1
m426.383	426.383	426.27	426.495	1
Nominale 427	427	426.5	427.5	1
m427.098	427.098	426.974	427.222	1
m427.393	427.393	427.267	427.52	1
Nominale 428	428	427.5	428.5	1
m428.409	428.409	428.284	428.534	1
Nominale 429	429	428.5	429.5	1
m429.07	429.07	428.919	429.22	1
Nominale 430	430	429.5	430.5	1
m430.065	430.065	429.914	430.216	1
Nominale 431	431	430.5	431.5	1
m431.061	431.061	430.905	431.217	1
m431.436	431.436	431.293	431.58	1
Nominale 432	432	431.5	432.5	1
m432.058	432.058	431.893	432.224	1
m432.439	432.439	432.283	432.594	1
Nominale 433	433	432.5	433.5	1
m433.055	433.055	432.877	433.234	1
m433.451	433.451	433.28	433.622	1
Nominale 434	434	433.5	434.5	1
m434.046	434.046	433.886	434.206	1
m434.469	434.469	434.311	434.627	1
Nominale 435	435	434.5	435.5	1
m435.069	435.069	434.916	435.221	1
m435.47	435.47	435.314	435.627	1
Nominale 436	436	435.5	436.5	1
m436.071	436.071	435.929	436.213	1
m436.468	436.468	436.323	436.614	1
Nominale 437	437	436.5	437.5	1
m437.069	437.069	436.97	437.168	1
m437.419	437.419	437.319	437.443	1
m437.468	437.468	437.443	437.557	1
Nominale 438	438	437.5	438.5	1
m438.111	438.111	438.012	438.21	1
m438.4	438.4	438.301	438.498	1
Nominale 439	439	438.5	439.5	1
m439.083	439.083	438.977	439.188	1
m439.386	439.386	439.28	439.493	1
Nominale 440	440	439.5	440.5	1
m440.407	440.407	440.302	440.512	1
Nominale 441	441	440.5	441.5	1
m441.059	441.059	440.945	441.174	1
m441.434	441.434	441.319	441.548	1
Nominale 442	442	441.5	442.5	1
m442.424	442.424	442.309	442.539	1
Nominale 443	443	442.5	443.5	1
m443.091	443.091	442.973	443.209	1
m443.424	443.424	443.304	443.545	1
Nominale 444	444	443.5	444.5	1
m444.454	444.454	444.345	444.563	1
Nominale 445	445	444.5	445.5	1
m445.095	445.095	444.939	445.25	1
Nominale 446	446	445.5	446.5	1
m446.098	446.098	445.942	446.254	1
m446.452	446.452	446.307	446.597	1
Nominale 447	447	446.5	447.5	1
m447.083	447.083	446.926	447.24	1
m447.47	447.47	447.324	447.617	1
Nominale 448	448	447.5	448.5	1
m448.088	448.088	447.931	448.245	1
m448.477	448.477	448.33	448.624	1
Nominale 449	449	448.5	449.5	1
m449.073	449.073	448.918	449.228	1
m449.471	449.471	449.322	449.621	1
Nominale 450	450	449.5	450.5	1
m450.084	450.084	449.92	450.248	1
m450.479	450.479	450.322	450.635	1
Nominale 451	451	450.5	451.5	1
m451.084	451.084	450.922	451.246	1
Nominale 452	452	451.5	452.5	1
m452.104	452.104	451.997	452.211	1
m452.422	452.422	452.316	452.527	1
Nominale 453	453	452.5	453.5	1
m453.424	453.424	453.32	453.527	1
Nominale 454	454	453.5	454.5	1
m454.417	454.417	454.314	454.52	1
Nominale 455	455	454.5	455.5	1
m455.441	455.441	455.332	455.55	1
Nominale 456	456	455.5	456.5	1
m456.427	456.427	456.32	456.534	1
Nominale 457	457	456.5	457.5	1
m457.056	457.056	456.942	457.17	1
m457.458	457.458	457.342	457.573	1
Nominale 458	458	457.5	458.5	1
m458.024	458.024	457.917	458.132	1
m458.461	458.461	458.351	458.57	1
Nominale 459	459	458.5	459.5	1
m459.067	459.067	458.951	459.096	1
m459.125	459.125	459.096	459.14	1
m459.155	459.155	459.14	459.27	1
m459.464	459.464	459.346	459.583	1
Nominale 460	460	459.5	460.5	1
m460.465	460.465	460.35	460.58	1
Nominale 461	461	460.5	461.5	1
m461.121	461.121	460.987	461.255	1
m461.471	461.471	461.335	461.608	1
Nominale 462	462	461.5	462.5	1
m462.123	462.123	461.961	462.284	1
m462.483	462.483	462.329	462.636	1
Nominale 463	463	462.5	463.5	1
m463.125	463.125	462.962	463.287	1
m463.487	463.487	463.327	463.647	1
Nominale 464	464	463.5	464.5	1
m464.111	464.111	463.951	464.27	1
m464.505	464.505	464.35	464.66	1
Nominale 465	465	464.5	465.5	1
m465.101	465.101	464.981	465.221	1
Nominale 466	466	465.5	466.5	1
m466.112	466.112	466.013	466.211	1
m466.425	466.425	466.326	466.523	1
Nominale 467	467	466.5	467.5	1
m467.442	467.442	467.34	467.544	1
Nominale 468	468	467.5	468.5	1
m468.431	468.431	468.331	468.531	1
Nominale 469	469	468.5	469.5	1
m469.427	469.427	469.323	469.53	1
Nominale 470	470	469.5	470.5	1
m470.467	470.467	470.362	470.571	1
Nominale 471	471	470.5	471.5	1
m471.464	471.464	471.356	471.573	1
Nominale 472	472	471.5	472.5	1
m472.467	472.467	472.36	472.574	1
Nominale 473	473	472.5	473.5	1
m473.043	473.043	472.931	473.07	1
m473.098	473.098	473.07	473.21	1
m473.477	473.477	473.362	473.591	1
Nominale 474	474	473.5	474.5	1
m474.497	474.497	474.384	474.609	1
Nominale 475	475	474.5	475.5	1
m475.493	475.493	475.37	475.616	1
Nominale 476	476	475.5	476.5	1
m476.491	476.491	476.373	476.61	1
Nominale 477	477	476.5	477.5	1
m477.519	477.519	477.383	477.655	1
Nominale 478	478	477.5	478.5	1
m478.505	478.505	478.397	478.612	1
Nominale 479	479	478.5	479.5	1
m479.084	479.084	478.923	479.244	1
Nominale 480	480	479.5	480.5	1
m480.076	480.076	479.951	480.2	1
Nominale 481	481	480.5	481.5	1
m481.073	481.073	480.969	481.177	1
m481.46	481.46	481.356	481.564	1
Nominale 482	482	481.5	482.5	1
m482.439	482.439	482.338	482.541	1
Nominale 483	483	482.5	483.5	1
m483.449	483.449	483.346	483.553	1
Nominale 484	484	483.5	484.5	1
m484.48	484.48	484.378	484.582	1
Nominale 485	485	484.5	485.5	1
m485.477	485.477	485.372	485.583	1
Nominale 486	486	485.5	486.5	1
m486.485	486.485	486.382	486.589	1
Nominale 487	487	486.5	487.5	1
m487.499	487.499	487.391	487.608	1
Nominale 488	488	487.5	488.5	1
m488.514	488.514	488.41	488.619	1
Nominale 489	489	488.5	489.5	1
m489.05	489.05	488.878	489.223	1
Nominale 490	490	489.5	490.5	1
m490.038	490.038	489.918	490.052	1
m490.067	490.067	490.052	490.187	1
Nominale 491	491	490.5	491.5	1
Nominale 492	492	491.5	492.5	1
m492.068	492.068	491.959	492.177	1
Nominale 493	493	492.5	493.5	1
m493.058	493.058	492.951	493.166	1
Nominale 494	494	493.5	494.5	1
m494.054	494.054	493.955	494.153	1
m494.441	494.442	494.343	494.54	1
Nominale 495	495	494.5	495.5	1
m495.469	495.469	495.368	495.57	1
Nominale 496	496	495.5	496.5	1
m496.432	496.432	496.335	496.467	1
m496.502	496.502	496.467	496.599	1
Nominale 497	497	496.5	497.5	1
m497.493	497.493	497.389	497.596	1
Nominale 498	498	497.5	498.5	1
m498.462	498.462	498.361	498.562	1
Nominale 499	499	498.5	499.5	1
m499.493	499.493	499.389	499.597	1
Nominale 500	500	499.5	500.5	1
Nominale 501	501	500.5	501.5	1
Nominale 502	502	501.5	502.5	1
Nominale 503	503	502.5	503.5	1
Nominale 504	504	503.5	504.5	1
Nominale 505	505	504.5	505.5	1
Nominale 506	506	505.5	506.5	1
Nominale 507	507	506.5	507.5	1
Nominale 508	508	507.5	508.5	1
Nominale 509	509	508.5	509.5	1
Nominale 510	510	509.5	510.5	1
Nominale 511	511	510.5	511.5	1
Nominale 512	512	511.5	512.5	1
Nominale 513	513	512.5	513.5	1
Nominale 514	514	513.5	514.5	1
Nominale 515	515	514.5	515.5	1
Nominale 516	516	515.5	516.5	1
Nominale 517	517	516.5	517.5	1
Nominale 518	518	517.5	518.5	1
Nominale 519	519	518.5	519.5	1
Nominale 520	520	519.5	520.5	1
Nominale 521	521	520.5	521.5	1
Nominale 522	522	521.5	522.5	1
Nominale 523	523	522.5	523.5	1
Nominale 524	524	523.5	524.5	1
Nominale 525	525	524.5	525.5	1
Nominale 526	526	525.5	526.5	1
Nominale 527	527	526.5	527.5	1
Nominale 528	528	527.5	528.5	1
Nominale 529	529	528.5	529.5	1
Nominale 530	530	529.5	530.5	1
