# Supplementary material
Source: Copernicus journal article supplement (doi:10.5194/egusphere-2026-401)
Supplement: Supplementary file 2 [file S03 - List of 42 significant BVOCs.xlsx]

## Sheet: List of 42 significants_COMPLET
				May					June				Note: added isotopes and fragments
			Ta_mean = 18.1 °C; Rg_mean = 276.4 W m-2					Ta_mean = 19.1 °C; Rg_mean = 281.5 W m-2
m/zb	Molecular formula	Tentative compound name	Net Emitter / Depositera	Proportionsd (%)	Mean Flux (nmol m-2 s-1)	Error	Error^2	Net Emitter / Depositera	Proportions (%)	Mean Flux (nmol m-2 s-1)	Error	Error^2
m31.018	(CH2O)H+	Formaldehyde; hydroxymethylene (GLOVOC database)	D	12.8362	-0.0113348	0.0050377	2.53784e-05	E	5.7651	0.666699	0.0050377	2.53784e-05
m33.033	(CH4O)H+	Methanol (GLOVOC database)	E	92.7035	4.46456	0.00656092	4.30456e-05	E	89.7748	10.3569	0.00656092	4.30456e-05
m41.038	(C3H4)H+	Fragments of a variety of compounds (e.g., 1-butene, propyne, and C4–C9 saturated and unsaturated alcohols) and many hydrocarbons (Salazar et al., 2021)	E	0.286795	0.0138119	0.0226751	0.000514158	E	0.342719	0.0395379	0.0226751	0.000514158
m43.018	(C2H2O)H+	Methylvinylketone, fragments of several oxygenated compounds (Salazar 2021); Hexyl acetate fragment (Brilli et al 2014)	E	0.342796	0.0165089	0.000744675	5.5454e-07	D	16.8914	-0.0403567	0.000744675	5.5454e-07
m45.033	(C2H4O)H+	Acetaldehyde, Ethylene oxide (GLOVOC database)	E	0.308605	0.0148623	8.67301e-05	7.5221e-09	E	0.304994	0.0351857	8.67301e-05	7.5221e-09
m47.013	(CH2O2)H+	Formic acid (GLOVOC database)	D	50.3458	-0.044457	0.000206381	4.2593e-08	D	44.9193	-0.107321	0.000206381	4.2593e-08
m49.014	(CH4S)H+	Methanethiol (GLOVOC database); Hydroxylamine, Ethyl (Brilli et al 2014)	E	0.328875	0.0158385	0.000227859	5.19199e-08	E	0.400213	0.0461707	0.000227859	5.19199e-08
m51.022	(C4H2)H+	Diacetylene, 1,3-Butadiyne (GLOVOC database)	E	0.0785835	0.00378454	0.0100961	0.00010193	E	0.0858551	0.0099047	0.0100961	0.00010193
m57.069	(C4H8)H+	Fragment (Salazar et al., 2021); Butene and hexyl acetate fragment (Brilli et al 2014)	E	0.110727	0.00533256	0.000910836	8.29622e-07	D	2.59206	-0.00619293	0.000910836	8.29622e-07
m59.049	(C3H6O)H+	Acetone (propanal) and/or methyl vinyl ether (MVE) (GLOVOC database; Brilli et al 2014)	E	0.919908	0.0443023	0.000291294	8.48521e-08	E	1.46832	0.169393	0.000291294	8.48521e-08
m60.048	(C2H5NO)H+	Acetamide or formamide N-methyl- or nitrosoethano (Brilli et al 2014)	E	0.0886154	0.00426767	0.000301418	9.0853e-08	E	0.104236	0.0120252	0.000301418	9.0853e-08
m61.029	(C2H4O2)H+	Acetic acid and glycolaldehyde (Brilli et al 2014)	E	0.310475	0.0149523	0.00689737	4.75738e-05	D	15.1011	-0.0360794	0.00689737	4.75738e-05
m62.029	(CH3NO2)H+	Nitromethane; methylnitrite (Pagonis et al., 2019; Brilli et al 2014)	E	0.135166	0.00650953	0.000377981	1.4287e-07	E	0.0833144	0.00961159	0.000377981	1.4287e-07
m63.006	(CH2O3)H+	Fragment (Salazar et al., 2021) or possibly Dimethylsulfide (m/z 63.026) if the peak integration was not good	E	0.5318	0.0256112	0.00538311	2.89778e-05	E	0.305301	0.0352212	0.00538311	2.89778e-05
m67.053	(C5H6)H+	1,3-cyclopentadiene (m 67.054; Pagonis et al., 2019; Brilli et al 2014)	E	0.0156911	0.000755676	0.000144448	2.08653e-08	E	0.00869784	0.00100343	0.000144448	2.08653e-08
m69.070	(C5H8)H+	Isoprene (GLOVOC database)	E	0.726525	0.0349891	0.00227527	5.17686e-06	E	0.413664	0.0477225	0.00227527	5.17686e-06
m73.064	(C4H8O)H+	Methyl-ethyl-ketone (MEK) or ethyl-vinyl-ether, butanal, 2-butanone, Salazar et al., 2021); 2-Butanone (MEK) and propanal 2-methyl (Brilli et al 2014)	E	0.164486	0.00792154	0.000478657	2.29113e-07	E	0.117004	0.0134981	0.000478657	2.29113e-07
m75.025	(C3H6S)H+; (CH3)2OHSi+	Methyl vinyl sulfide, Thietane, Methyl-thiirane (GLOVOC database); Fragment possibly originating from trimethylsilanol (Salazar et al., 2021)	E	0.0900438	0.00433647	0.000234427	5.49562e-08	E	0.0624028	0.00719912	0.000234427	5.49562e-08
m77.005	(C2H4OS)H+	Thioacetic acid (Pagonis et al., 2019)	D	2.19907	-0.00194185	0.00109089	1.19005e-06	D	1.03019	-0.00246133	0.00109089	1.19005e-06
m82.074	(C6H9)H+	Unidentified compound, correlated with m/z 83.084	E	0.0232284	0.00111867	0.000942744	8.88766e-07	E	0.00589101	0.000679618	0.000942744	8.88766e-07
m83.049	(C5H6O)H+	3-methylfuran (Salazar et al., 2021; Brilli et al 2014)	E	0.0729326	0.0035124	0.000189271	3.58236e-08	E	0.0387398	0.00446923	0.000189271	3.58236e-08
m83.084	(C6H10)H+	cyclohexene (Salazar et al., 2021); Hexenol fragment or cyclohexene or hexenes or 1,3-hexadiene (Brilli et al 2014)	E	0.108548	0.00522762	0.000238862	5.70548e-08	E	0.0432591	0.0049906	0.000238862	5.70548e-08
m87.042	(C4H6O2)H+	cyclopropanecarboxylic acid, 2,3-butanedione, methyl acrylate, y-butyrolactone (Pagonis et al., 2019); 2,3-Butadione (Brilli et al 2014)	E	0.10074	0.00485157	0.000389107	1.51404e-07	E	0.0651326	0.00751404	0.000389107	1.51404e-07
m87.078	(C5H10O)H+	2-methyl-3-buten-1-ol (MBO), pentanal, methylbutanal, pentanal, allyl ethyl ether, 2-pentanone, 3-methyl-2-butanone, 3-pentanone (Pagonis et al., 2019)	E	0.0960534	0.00462588	0.00270422	7.3128e-06	E	0.0131181	0.00151337	0.00270422	7.3128e-06
m93.035	(C3H8OS)H+; (CH3)2SiOH.(H2O)+; (C6H4O)H+	2-Methylmercaptoethanol (GLOVOC database); Trimethylsilanol water cluster (Salazar et al., 2021); unidentified ion	E	0.20795	0.0100148	0.000501702	2.51705e-07	E	0.0722155	0.00833116	0.000501702	2.51705e-07
m95.015	(C2H6O2S)H+	Dimethyl sulfone (GLOVOC database)	E	0.0794771	0.00382758	0.00163767	2.68195e-06	E	0.0658715	0.00759928	0.00163767	2.68195e-06
m95.083	(C7H10)H+; (C5H6N2)H+	Sesquiterpene or monoterpene fragment ; Pyrydinamine, methyl diazina (Brilli et al 2014)	E	0.077457	0.00373029	0.000319815	1.02282e-07	E	0.0297508	0.00343221	0.000319815	1.02282e-07
m99.008	(C4H2O3)H+	Maleic anhydride (GLOVOC database)	D	1.54669	-0.00136577	0.00109338	1.19548e-06	D	0.954599	-0.00228072	0.00109338	1.19548e-06
m101.059	(C5H8O2)H+	1,5-pentanedial, methyl methacrylate, y-valerolactone (Pagonis et al., 2019); 2-3-Pentanedione (Makhoul et al 2014); 2,3-Pentanedione, acetyl acetone, 2-butenoic acid methyl ester (Brilli et al 2014)	E	0.0944946	0.00455082	0.00113686	1.29244e-06	E	0.0431197	0.00497452	0.00113686	1.29244e-06
m103.074	(C5H10O2)H+	pentanoic acid, trimethylacetic acid, 1,2-cyclopentanediol, butyl formate, isopropyl acetate, methyl butanoate, ethyl propionate, methyl butyrate, propyl acetate, ethyl proanoate, (Pagonis et al., 2019)	E	0.0821518	0.00395639	0.00025772	6.64197e-08	E	0.0016133	0.000186119	0.00025772	6.64197e-08
m105.066	(C8H8)H+	Styrene, Olefin (GLOVOC database, Brilli et al 2014; Pagonis et al., 2019)	E	0.342224	0.0164814	3.83232e-05	1.46867e-09	E	0.00708424	0.000817276	3.83232e-05	1.46867e-09
m109.100	(C8H12)H+	Unidentified compound; no correlation with others	E	0.0503591	0.00242527	0.000662689	4.39156e-07	E	0.0360172	0.00415514	0.000662689	4.39156e-07
m115.078	(C6H10O2)H+	hexenoic acid (C6H10O2)H+, GLOVOC database); Caprolactone (Di Guardo et al 2021)	E	0.0468403	0.00225581	0.000534074	2.85235e-07	E	0.0187731	0.00216577	0.000534074	2.85235e-07
m118.074	(C8H7N)H+	Indole (m/z 118.065, GLOVOC database; Brilli et al., 2014)	E	0.0304014	0.00146412	0.000253505	6.42647e-08	E	0.00109161	0.000125934	0.000253505	6.42647e-08
m121.098	(C9H12)H+	Trimethylbenzene, ethyl toluene (m/z 121.101, Salazar et al., 2021; Pagonis et al., 2019); correlation only with m/z 118.074	E	0.230439	0.0110978	0.000374966	1.40599e-07	E	0.00438081	0.000505394	0.000374966	1.40599e-07
m137.129	(C10H16)H+	Monoterpenes (GLOVOC database)	E	1.14412	0.0551005	0.000133074	1.77088e-08	E	0.312345	0.0360337	0.000133074	1.77088e-08
m167.052	(Si2O(CH3)4(H2O)2+; (C9H10OS)H+	Cluster of siloxane L2 hexamethyldisiloxane ([C6H18OSi2]H+) (Salazar 2021); p-thiocresol (GLOVOC database)	E	0.000997113	4.80205e-05	0.000119436	1.4265e-08	D	1.01928	-0.00243524	0.000119436	1.4265e-08
m205.186	(C15H24)H+	Sesquiterpenes (m/z 205.195, GLOVOC database)	E	0.0689987	0.00332294	0.000330549	1.09263e-07	E	0.00496023	0.000572239	0.000330549	1.09263e-07
m223.057	(C6H18O3Si3)H+	D3-siloxane Hexamethylcyclotrisiloxane (Chen et al., 2022; 223.064, Salazar et al., 2021; Holzinger et al., 2019)	D	13.9899	-0.0123536	1.62963e-06	2.65569e-12	D	14.7585	-0.0352608	1.62963e-06	2.65569e-12	m223.057+m209.000.1+m224.058+m225.036+m226.038+m227.022+m228.020+m229.005+m230.007
m247.006	?	Unidentified compound; correlated with some masses	D	0.0807836	-7.13345e-05	0.000209063	4.37073e-08	D	0.0576957	-0.000137846	0.000209063	4.37073e-08
m297.071	(C8H24Si4O4)H+	D4-siloxane Octaméthylcyclotétrasiloxane (Holzinger et al., 2019; Salazar et al., 2021)	D	18.8266	-0.0166245	9.59542e-06	9.20721e-11	D	2.52782	-0.00603945	9.59542e-06	9.20721e-11	m297.071+m281.046+m282.041+m283.023+m284.022+m298.074+m299.052+m300.051+m301.048+m302.046
m355.051	(C9H27O5Si5)H+	Fragment of D5-siloxane décamethlycyclopentasiloxane C10H30O5Si5 (Holzinger et al., 2019)	D	0.174927	-0.000154466	3.99397e-05	1.59518e-09	D	0.148004	-0.000353609	3.99397e-05	1.59518e-09	The detected isotopes were not significant
			Total emitted flux		4.81595		0.0275108			11.5381		0.0270786
			Total deposited flux		-0.0883032		0.0052775			-0.238919		0.00717257

## Sheet: 20 composés
					May					June
			Net Emitter / Depositera		Ta_mean = 18.1 °C	Rg_mean = 276.4 W m-2				Ta_mean = 19.1 °C	Rg_mean = 281.5 W m-2							0.678034	m31.018		14.8215	m33.033
m/zb	Molecular formula	Tentative compound namec	E or D		Proportionsd (%)	Mean Flux (nmol m-2 s-1)	Error	Error^2		Proportions (%)	Mean Flux (nmol m-2 s-1)	Error	Error^2	Sommes en valeurs absolues du flux moyen sur les deux périodes				14.8215	m33.033		0.678034	m31.018
m31.018	(CH2O)H+	Formaldehyde; hydroxymethylene (GLOVOC database)	D/E	D	12.8362	-0.0113348	0.0050377	2.53784e-05	E	5.7651	0.666699	0.0050377	2.53784e-05	0.678034	m31.018			0.0533498	m41.038		0.213695	m59.049
m33.033	(CH4O)H+	Methanol (GLOVOC database)	E	E	92.7035	4.46456	0.00656092	4.30456e-05	E	89.7748	10.3569	0.00656092	4.30456e-05	14.8215	m33.033			0.0568656	m43.018		0.151778	m47.013
m41.038	(C3H4)H+	Fragments of a variety of compounds (e.g., 1-butene, propyne, and C4–C9 saturated and unsaturated alcohols) and many hydrocarbons (Salazar et al., 2021)	E	E	0.286795	0.0138119	0.0226751	0.000514158	E	0.342719	0.0395379	0.0226751	0.000514158	0.0533498	m41.038			0.050048	m45.033		0.0911342	m137.129
m43.018	(C2H2O)H+	Methylvinylketone, fragments of several oxygenated compounds (Salazar 2021); Hexyl acetate fragment (Brilli et al 2014)	E/D	E	0.342796	0.0165089	0.000744675	5.5454e-07	D	16.8914	-0.0403567	0.000744675	5.5454e-07	0.0568656	m43.018			0.151778	m47.013		0.0827116	m69.070
m45.033	(C2H4O)H+	Acetaldehyde, Ethylene oxide (GLOVOC database)	E	E	0.308605	0.0148623	8.67301e-05	7.5221e-09	E	0.304994	0.0351857	8.67301e-05	7.5221e-09	0.050048	m45.033			0.0620092	m49.014		0.0620092	m49.014
m47.013	(CH2O2)H+	Formic acid (GLOVOC database)	D	D	50.3458	-0.044457	0.000206381	4.2593e-08	D	44.9193	-0.107321	0.000206381	4.2593e-08	0.151778	m47.013			0.0136892	m51.022		0.0608324	m63.006
m49.014	(CH4S)H+	Methanethiol (GLOVOC database); Hydroxylamine, Ethyl (Brilli et al 2014)	E	E	0.328875	0.0158385	0.000227859	5.19199e-08	E	0.400213	0.0461707	0.000227859	5.19199e-08	0.0620092	m49.014			0.0115255	m57.069		0.0568656	m43.018
m51.022	(C4H2)H+	Diacetylene, 1,3-Butadiyne (GLOVOC database)	E	E	0.0785835	0.00378454	0.0100961	0.00010193	E	0.0858551	0.0099047	0.0100961	0.00010193	0.0136892	m51.022			0.213695	m59.049		0.0533498	m41.038
m59.049	(C3H6O)H+	Acetone (propanal) and/or methyl vinyl ether (MVE) (GLOVOC database; Brilli et al 2014)	E	E	0.919908	0.0443023	0.000291294	8.48521e-08	E	1.46832	0.169393	0.000291294	8.48521e-08	0.213695	m59.049			0.0510317	m61.029		0.050048	m45.033
m60.048	(C2H5NO)H+	Acetamide or formamide N-methyl- or nitrosoethano (Brilli et al 2014)	E	E	0.0886154	0.00426767	0.000301418	9.0853e-08	E	0.104236	0.0120252	0.000301418	9.0853e-08	0.0162929	m60.048			0.0161211	m62.029		0.0476144	m223.057
m61.029	(C2H4O2)H+	Acetic acid and glycolaldehyde (Brilli et al 2014)	E/D	E	0.310475	0.0149523	0.00689737	4.75738e-05	D	15.1011	-0.0360794	0.00689737	4.75738e-05	0.0510317	m61.029			0.0608324	m63.006		0.0226639	m297.071
m62.029	(CH3NO2)H+	Nitromethane; methylnitrite (Pagonis et al., 2019; Brilli et al 2014)	E	E	0.135166	0.00650953	0.000377981	1.4287e-07	E	0.0833144	0.00961159	0.000377981	1.4287e-07	0.0161211	m62.029			0.0017591	m67.053		0.0214197	m73.064
m63.006	(CH2O3)H+	Fragment (Salazar et al., 2021) or possibly Dimethylsulfide (m/z 63.026) if the peak integration was not good	E	E	0.5318	0.0256112	0.00538311	2.89778e-05	E	0.305301	0.0352212	0.00538311	2.89778e-05	0.0608324	m63.006			0.0827116	m69.070		0.018346	m93.035
m69.070	(C5H8)H+	Isoprene (GLOVOC database)	E	E	0.726525	0.0349891	0.00227527	5.17686e-06	E	0.413664	0.0477225	0.00227527	5.17686e-06	0.0827116	m69.070			0.0115356	m75.025		0.0162929	m60.048
m73.064	(C4H8O)H+	Methyl-ethyl-ketone (MEK) or ethyl-vinyl-ether, butanal, 2-butanone, Salazar et al., 2021); 2-Butanone (MEK) and propanal 2-methyl (Brilli et al 2014)	E	E	0.164486	0.00792154	0.000478657	2.29113e-07	E	0.117004	0.0134981	0.000478657	2.29113e-07	0.0214197	m73.064			0.00440318	m77.005		0.0161211	m62.029
m93.035	(C3H8OS)H+; (CH3)2SiOH.(H2O)+	2-Methylmercaptoethanol (GLOVOC database); Trimethylsilanol water cluster (Salazar et al., 2021)	E	E	0.20795	0.0100148	0.000501702	2.51705e-07	E	0.0722155	0.00833116	0.000501702	2.51705e-07	0.018346	m93.035			0.0071625	m95.083		0.00952533	m101.059
m105.066	(C8H8)H+	Styrene, Olefin (GLOVOC database, Brilli et al 2014; Pagonis et al., 2019)	E	E	0.342224	0.0164814	3.83232e-05	1.46867e-09	E	0.00708424	0.000817276	3.83232e-05	1.46867e-09	0.0172986	m105.066			0.00442157	m115.078		0.00440318	m77.005
m137.129	(C10H16)H+	Monoterpenes (GLOVOC database)	E	E	1.14412	0.0551005	0.000133074	1.77088e-08	E	0.312345	0.0360337	0.000133074	1.77088e-08	0.0911342	m137.129			0.00389518	m205.186		0.00179829	m82.074
m223.057	(C6H18O3Si3)H+	D3-siloxane Hexamethylcyclotrisiloxane (Chen et al., 2022; 223.064, Salazar et al., 2021; Holzinger et al., 2019)	D	D	13.9899	-0.0123536	1.62963e-06	2.65569e-12	D	14.7585	-0.0352608	1.62963e-06	2.65569e-12	0.0476144	m223.057			0.000508075	m355.051		0.00020918	m247.006
m297.071	(C8H24Si4O4)H+	D4-siloxane Octaméthylcyclotétrasiloxane (Holzinger et al., 2019; Salazar et al., 2021)	D	D	18.8266	-0.0166245	9.59542e-06	9.20721e-11	D	2.52782	-0.00603945	9.59542e-06	9.20721e-11	0.0226639	m297.071
			Sommes E/D			4.74951		0.0272451			11.4871	0	0.0268243
						-0.0847697		0.00504194			-0.225057	0	0.00694053
0.678034	m31.018	D/E
14.8215	m33.033	E
0.0533498	m41.038	E
0.0568656	m43.018	E/D
0.050048	m45.033	E
0.151778	m47.013	D
0.0620092	m49.014	E
0.0136892	m51.022	E
0.213695	m59.049	E
0.0162929	m60.048	E
0.0510317	m61.029	E/D
0.0161211	m62.029	E
0.0608324	m63.006	E
0.0827116	m69.070	E
0.0214197	m73.064	E
0.018346	m93.035	E
0.0172986	m105.066	E
0.0911342	m137.129	E
0.0476144	m223.057	D
0.0226639	m297.071	D
