# Supplementary material
Source: Copernicus journal article supplement (doi:10.5194/egusphere-2026-401)

m31.018

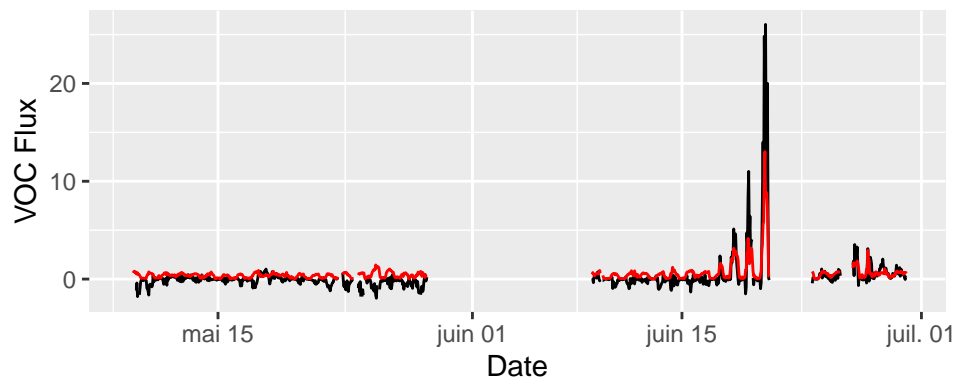

m33.033

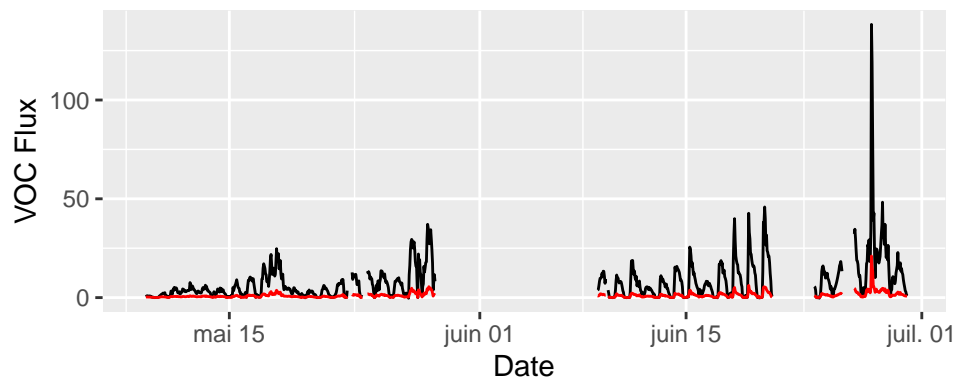

m41.038

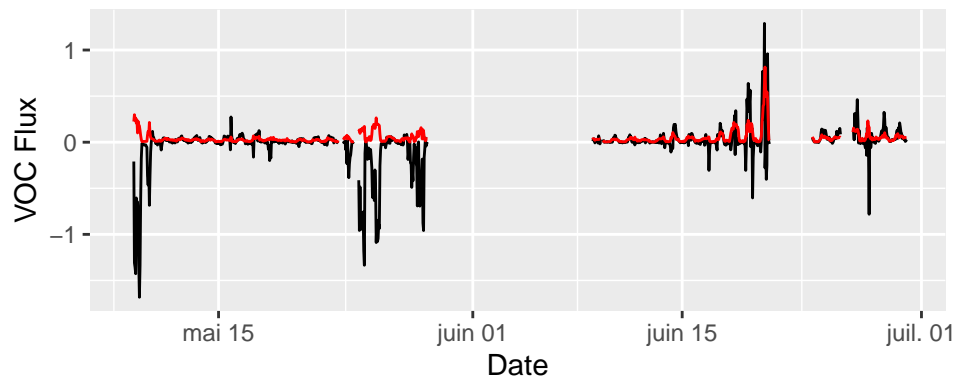

m43.018

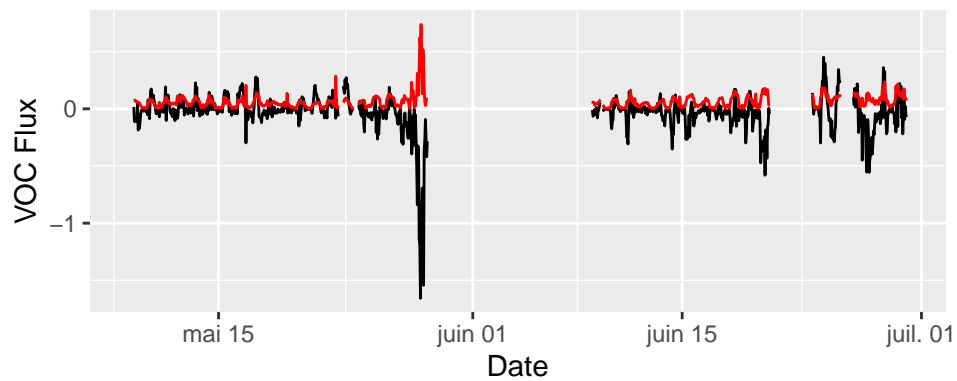

m45.033

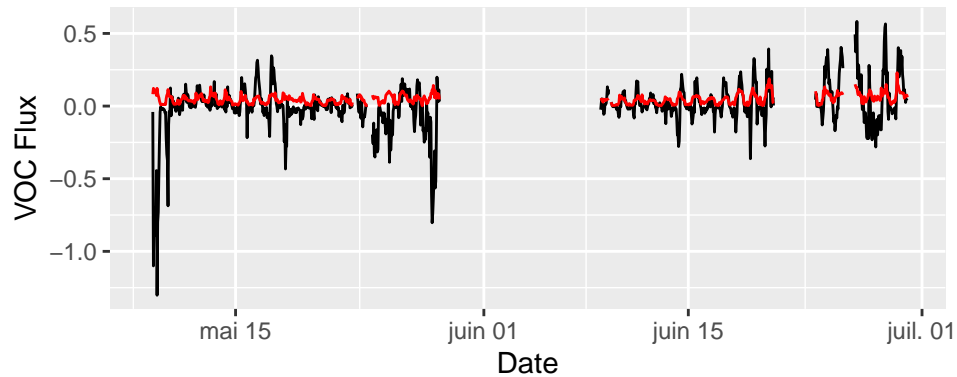

m47.013

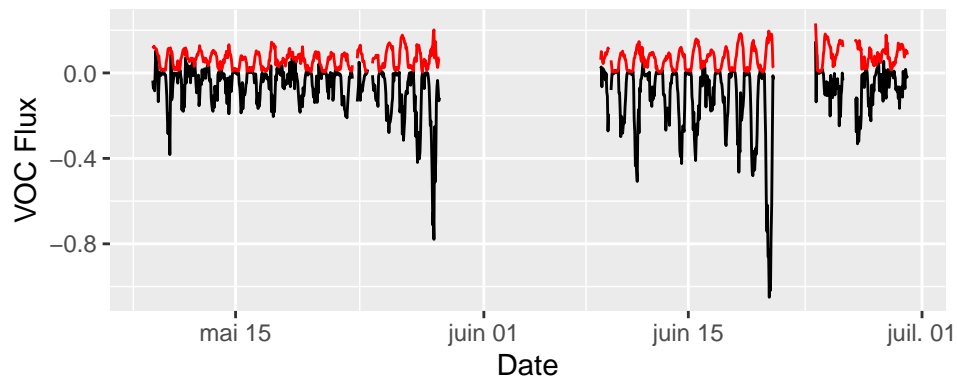

m49.014

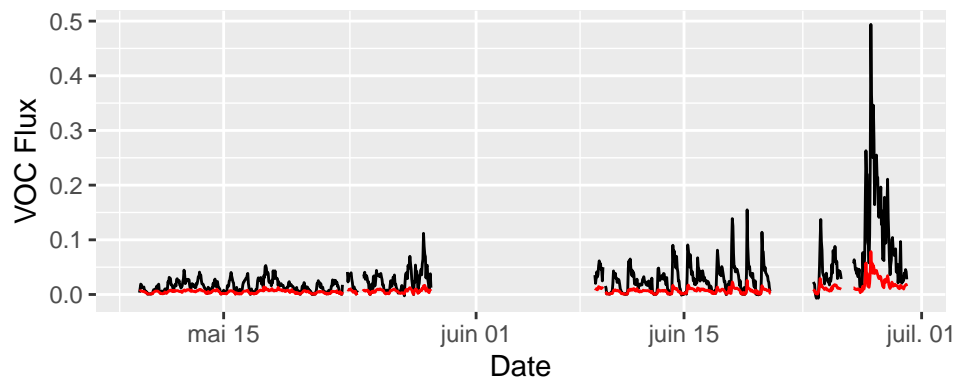

m51.022

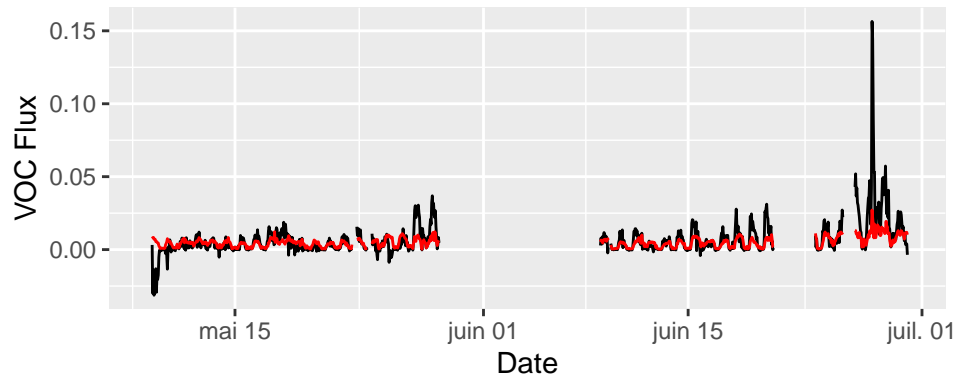

m57.069

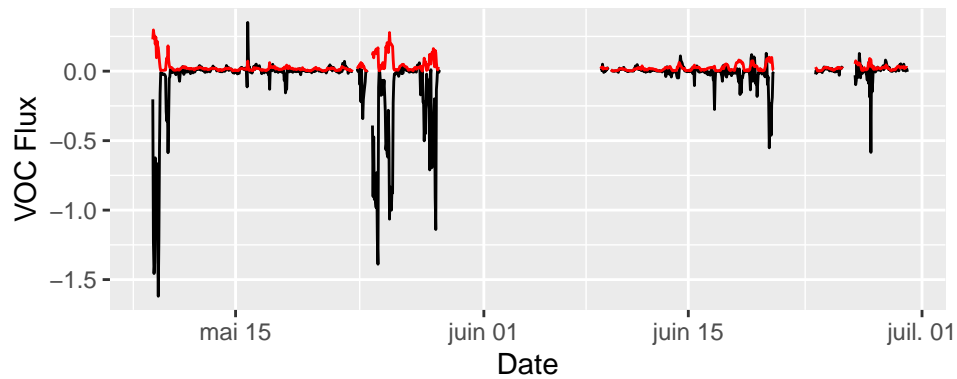

m59.049

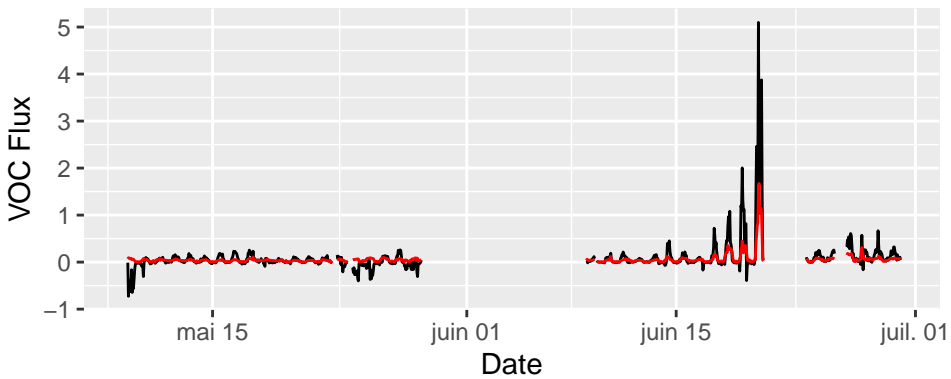

m60.048

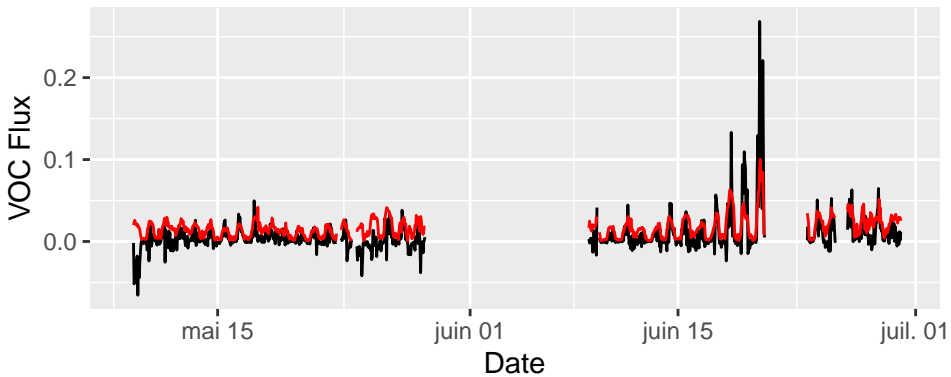

m61.029

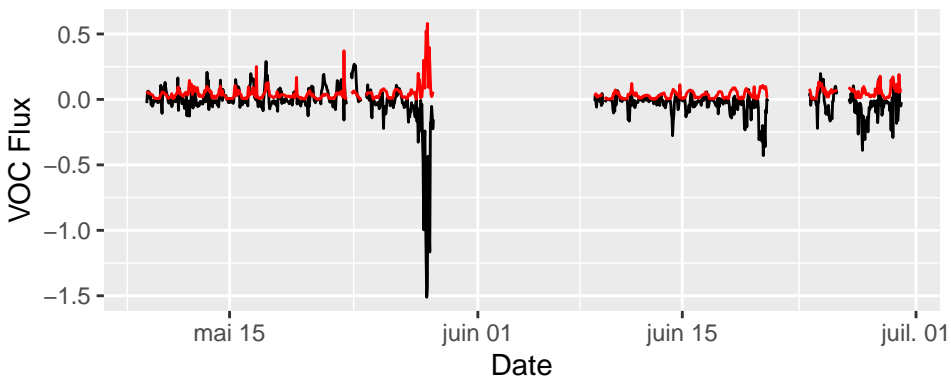

m62.029

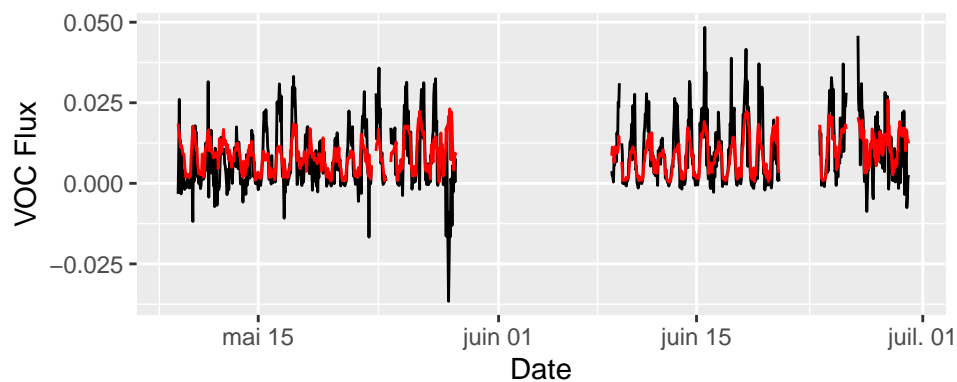

m63.006

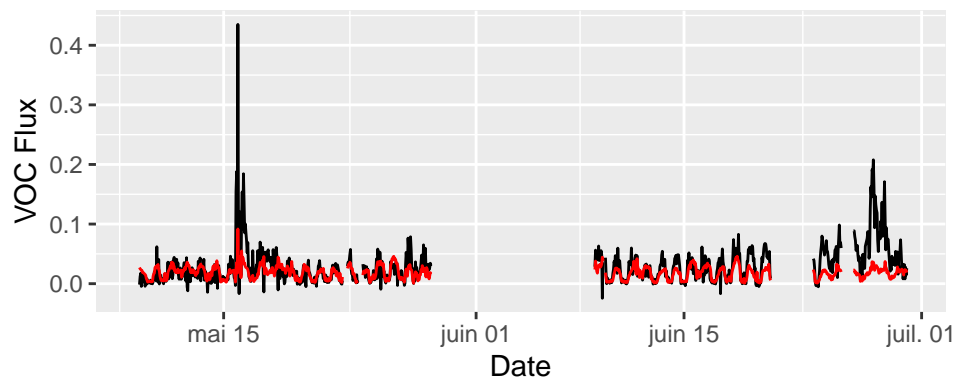

m67.053

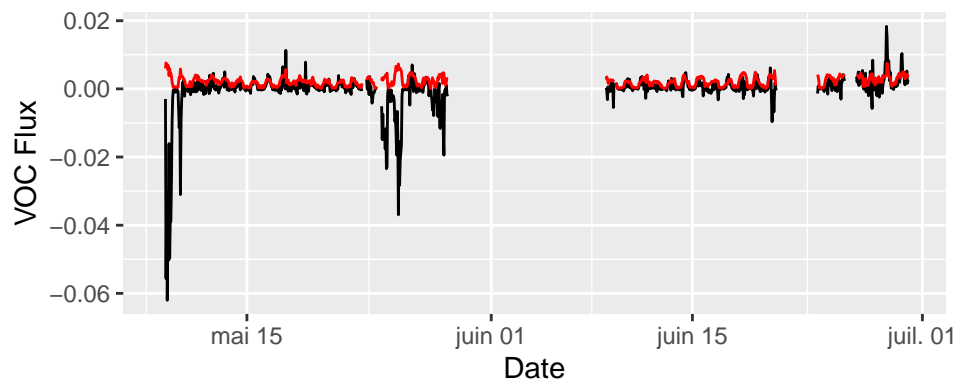

m69.070

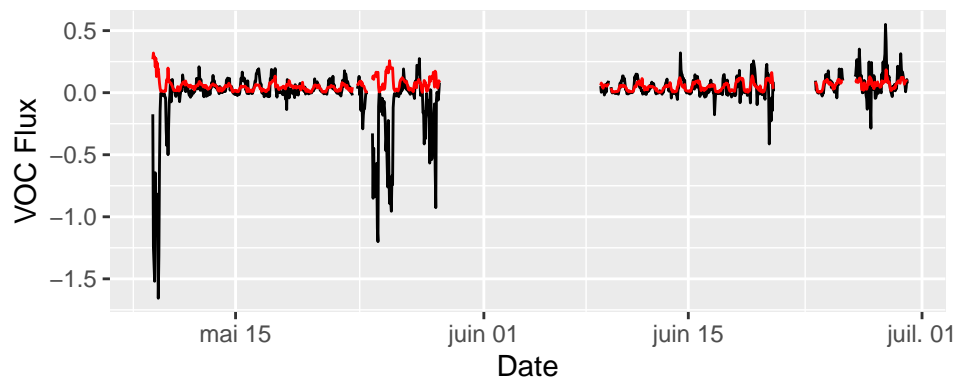

m73.064

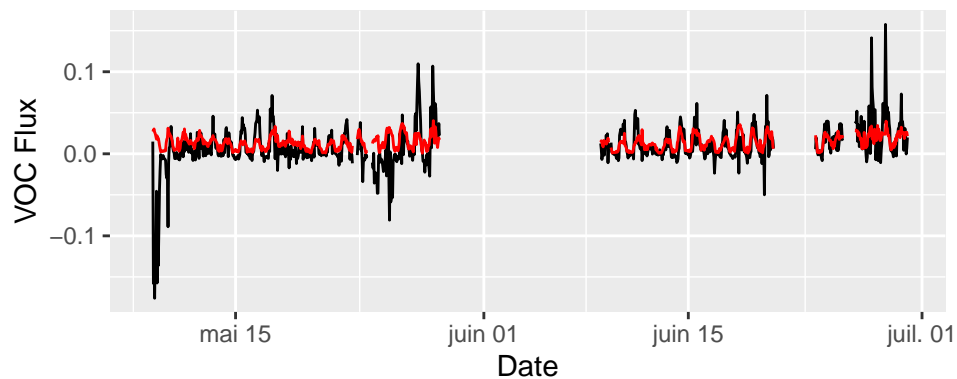

m75.025

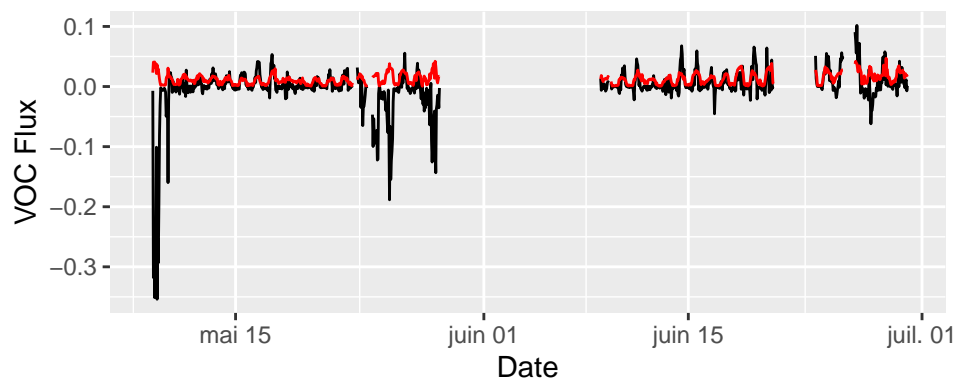

m77.005

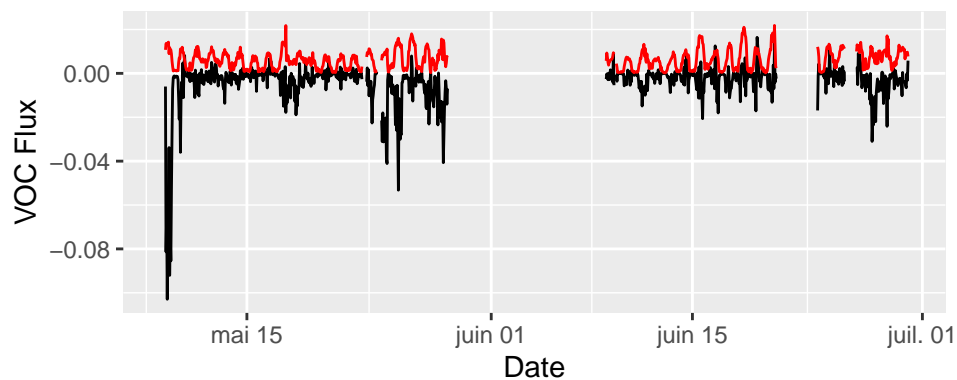

m82.074

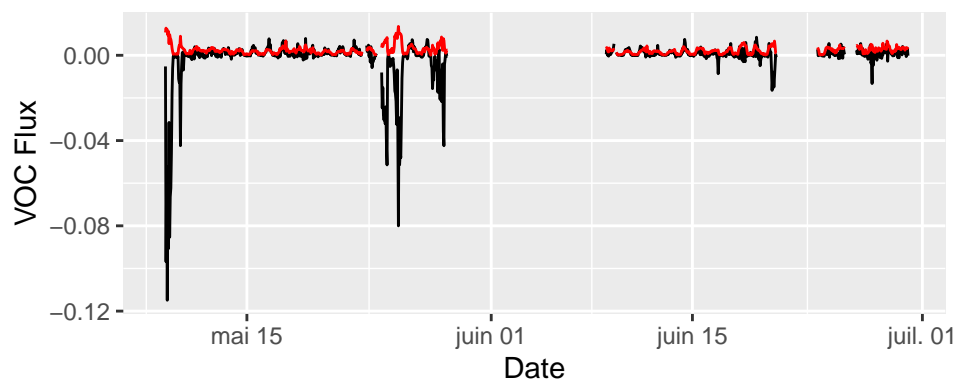

m83.049

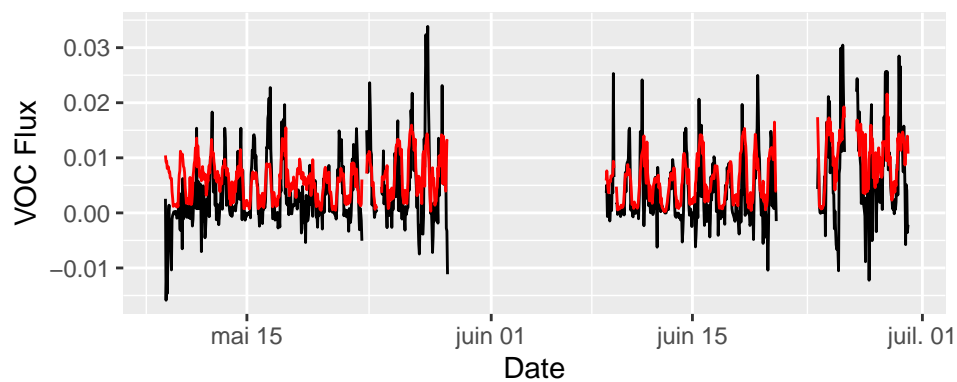

m83.084

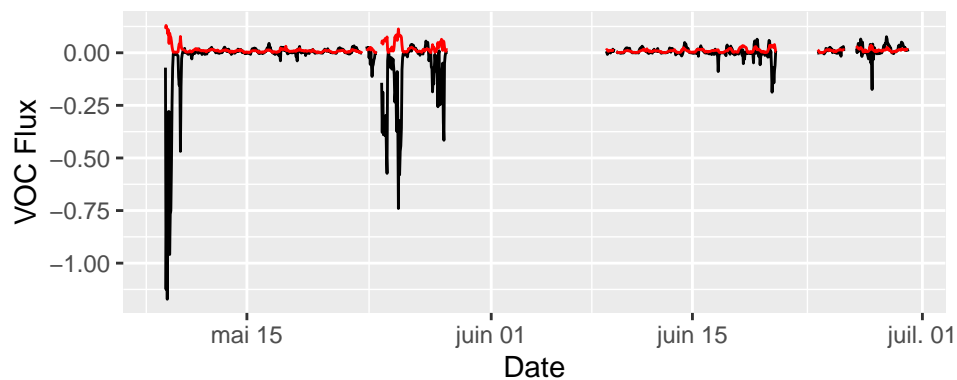

m87.042

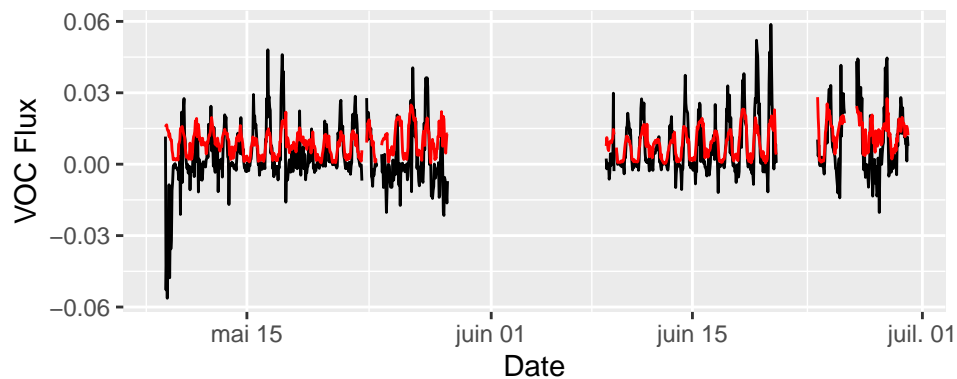

m87.078

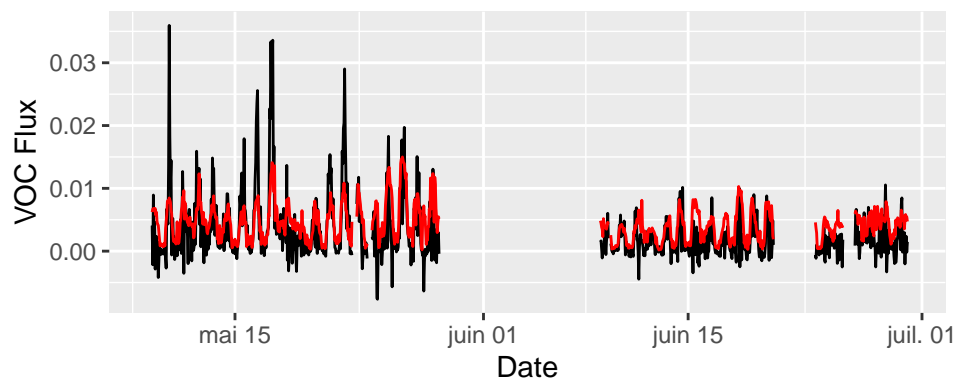



m93.035

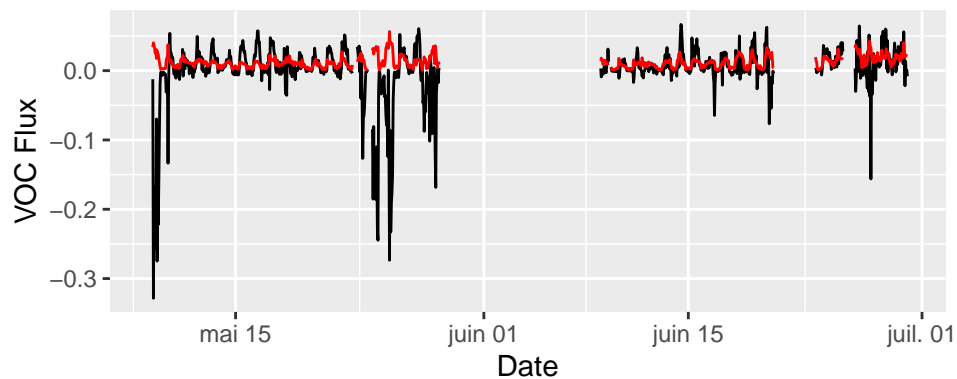

m95.015

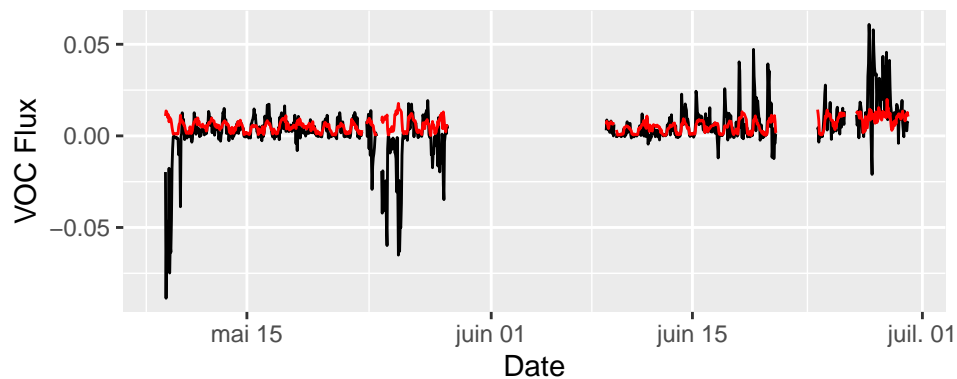

m95.083

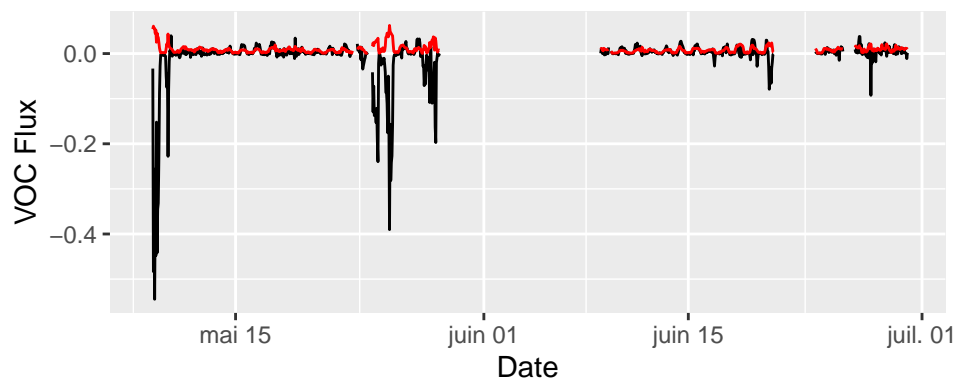

m99.008

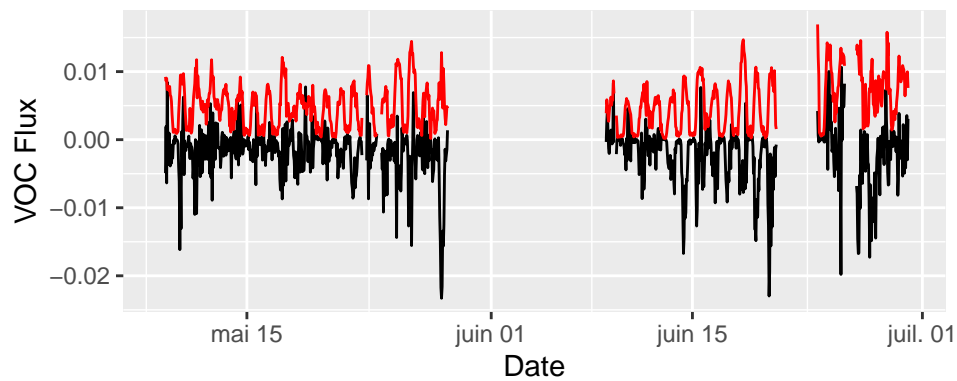

m101.059

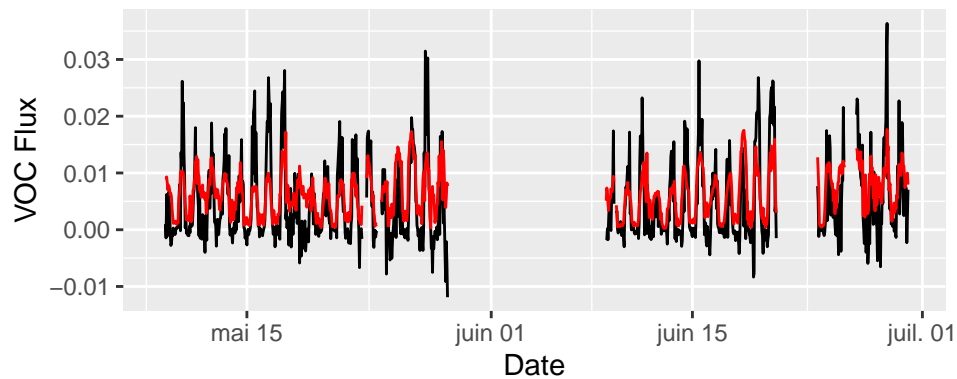

m103.074

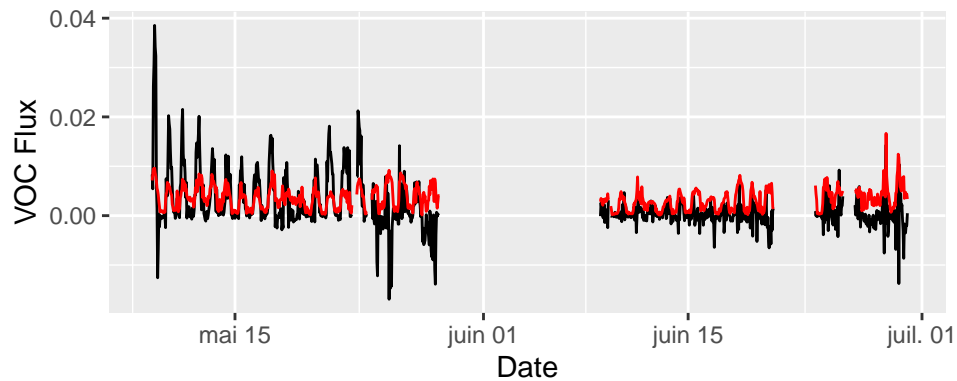

m105.066

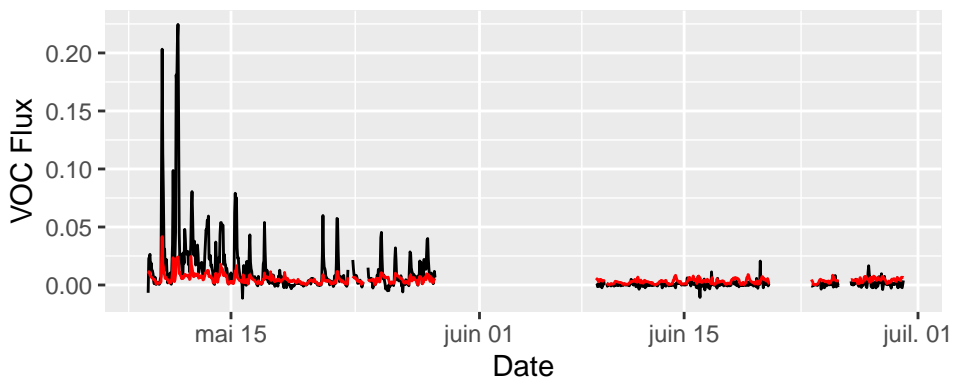

m109.100

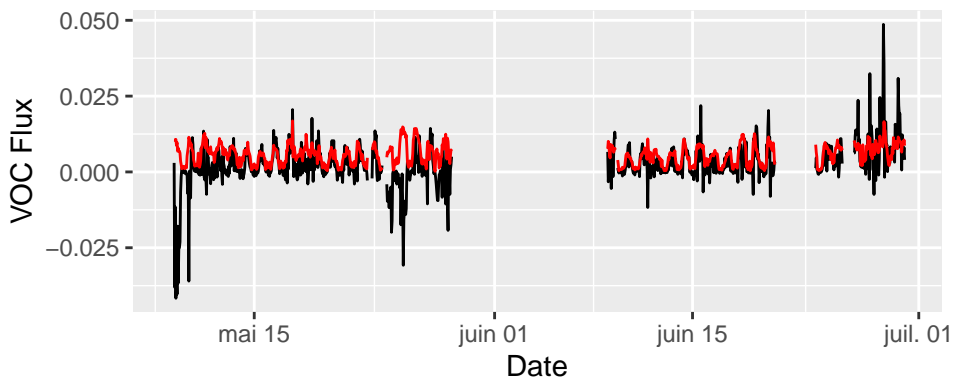

m115.078

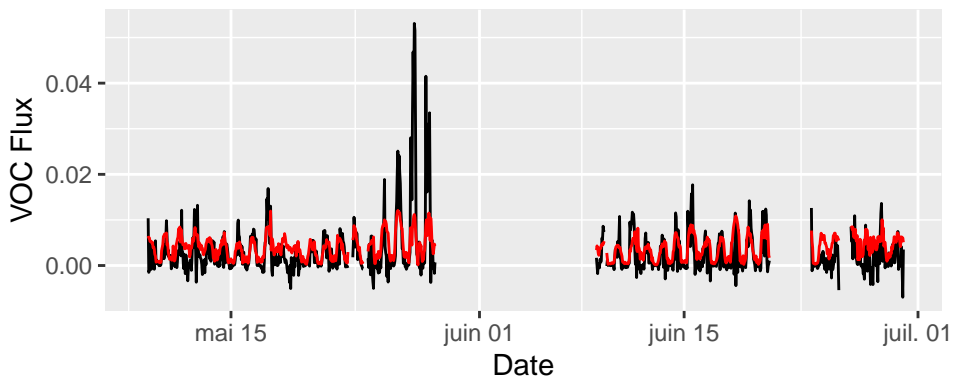

m118.074

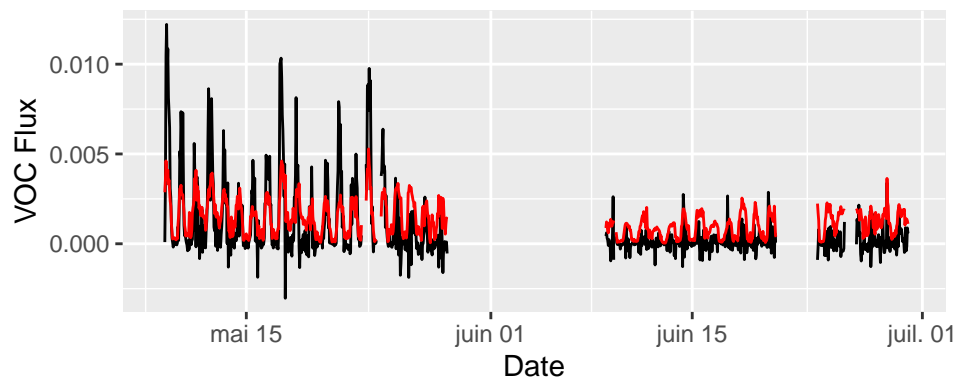

m121.098

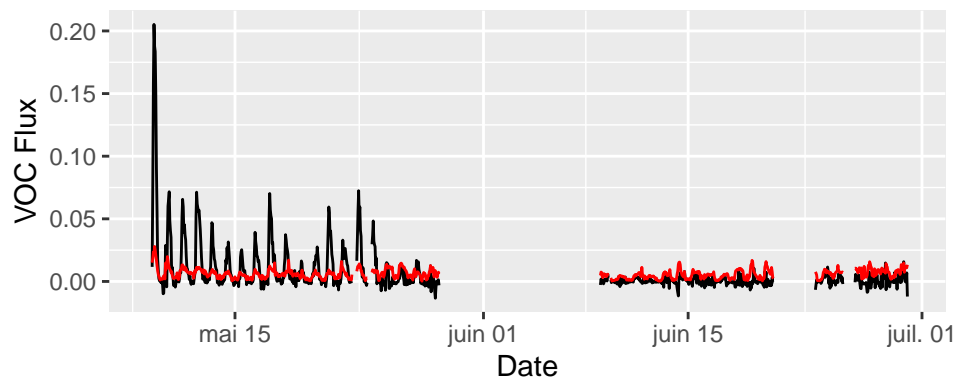

m137.129

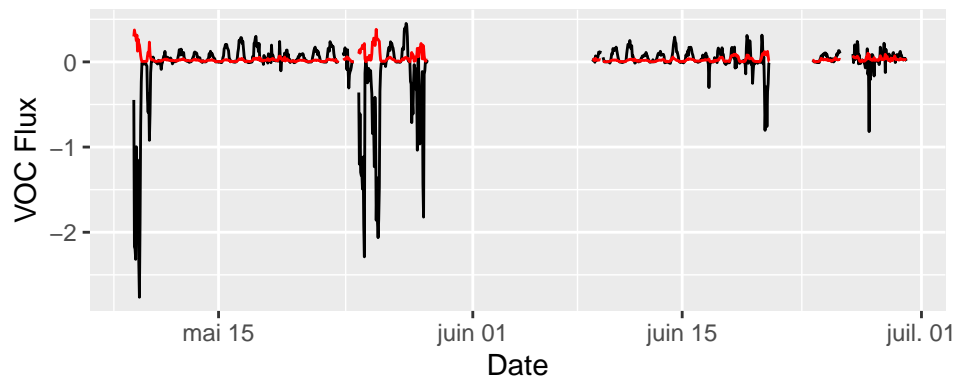

m167.052

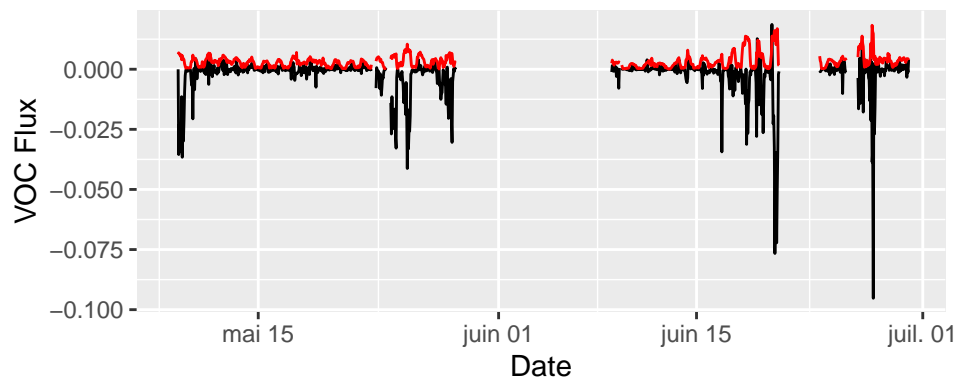

m205.186

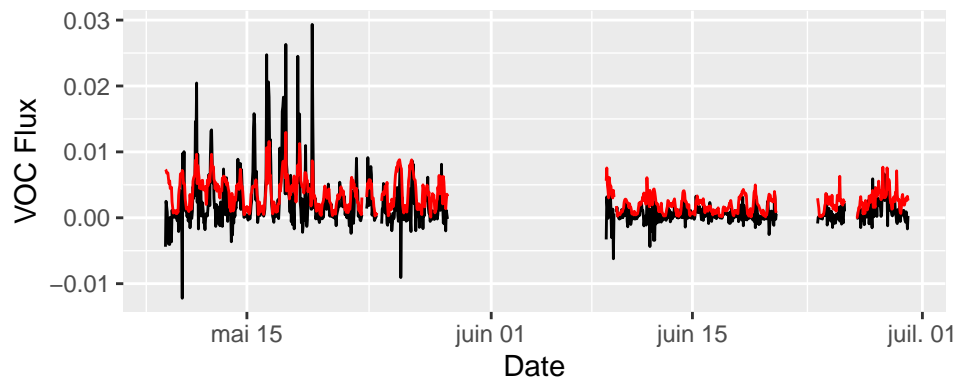

m223.057

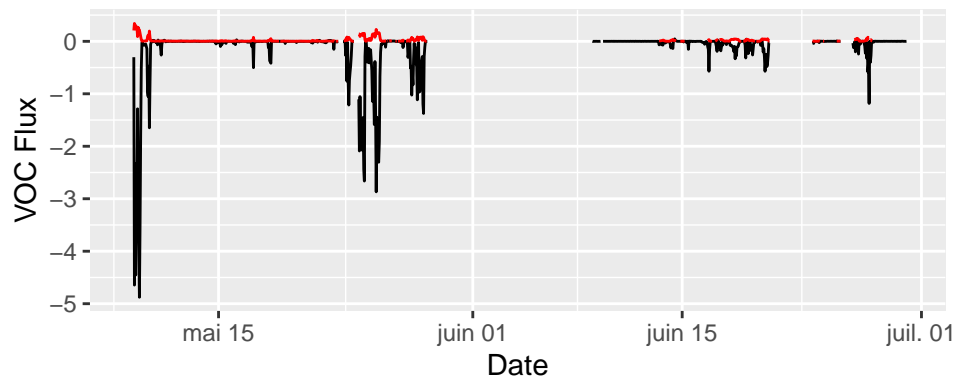

m247.006

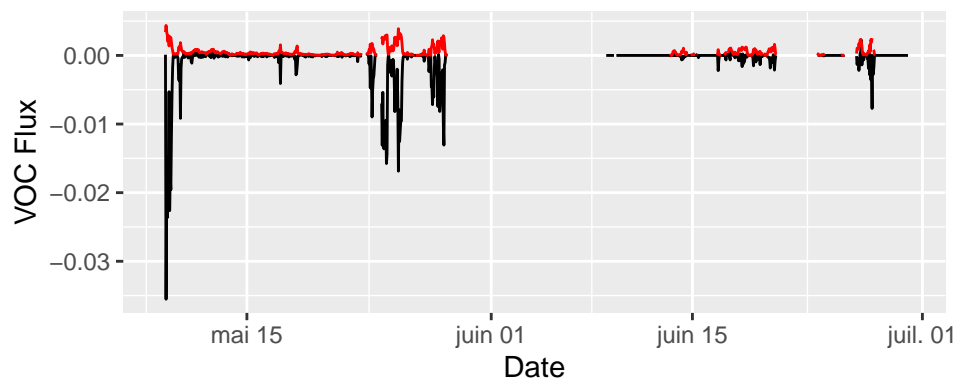

m297.071

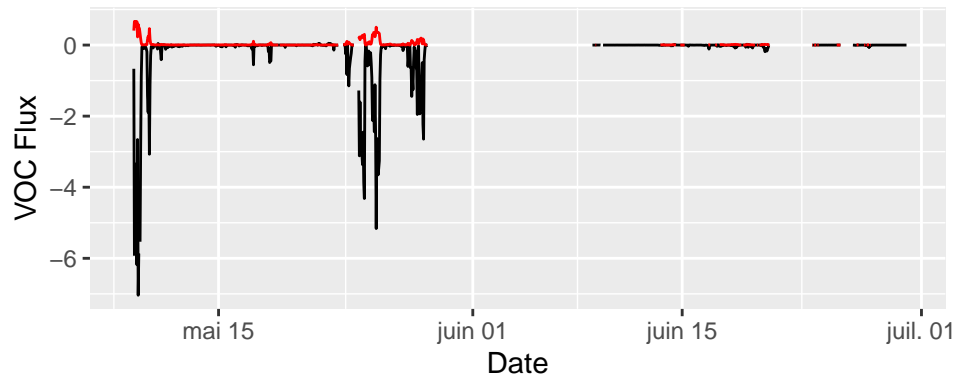

m355.051

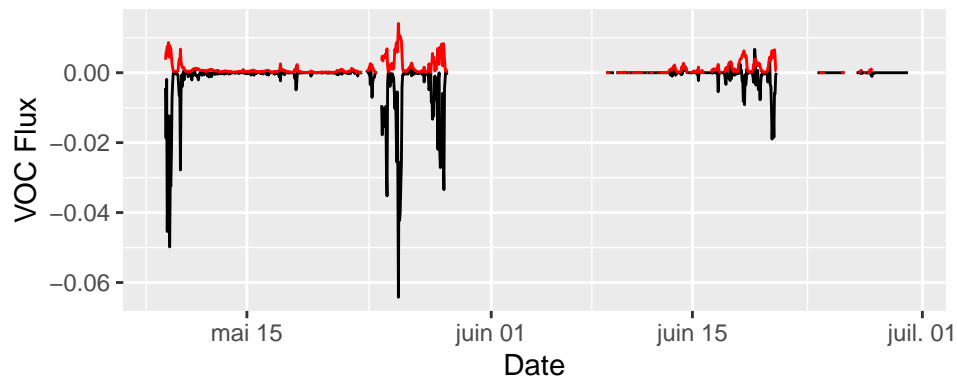

Supplement: Supplementary file 1 [file Fig. S04 - Temporal course of fluxes (black) and random error (red) for the 42 significant BVOC.pdf › Supplementary Material/Fig. S04 - Temporal course of fluxes (black) and random error (red) for the 42 significant BVOC.pdf]

# m31.018

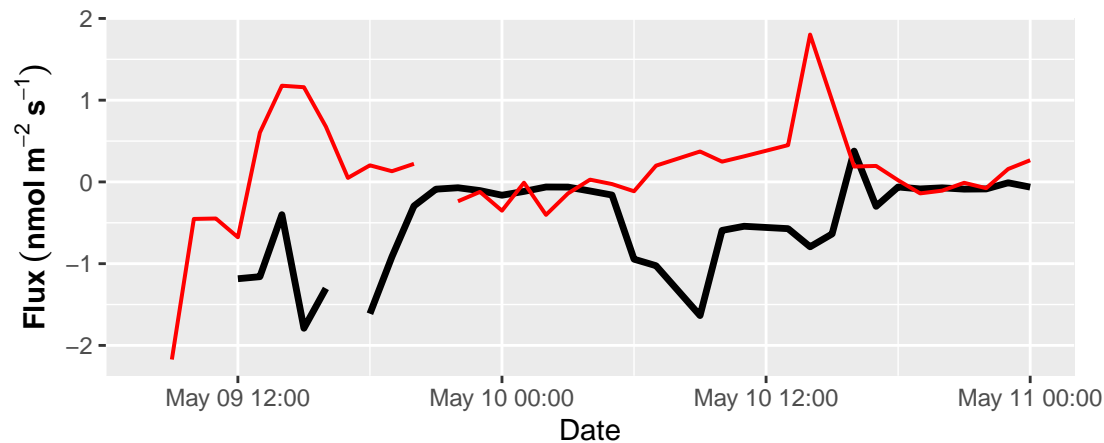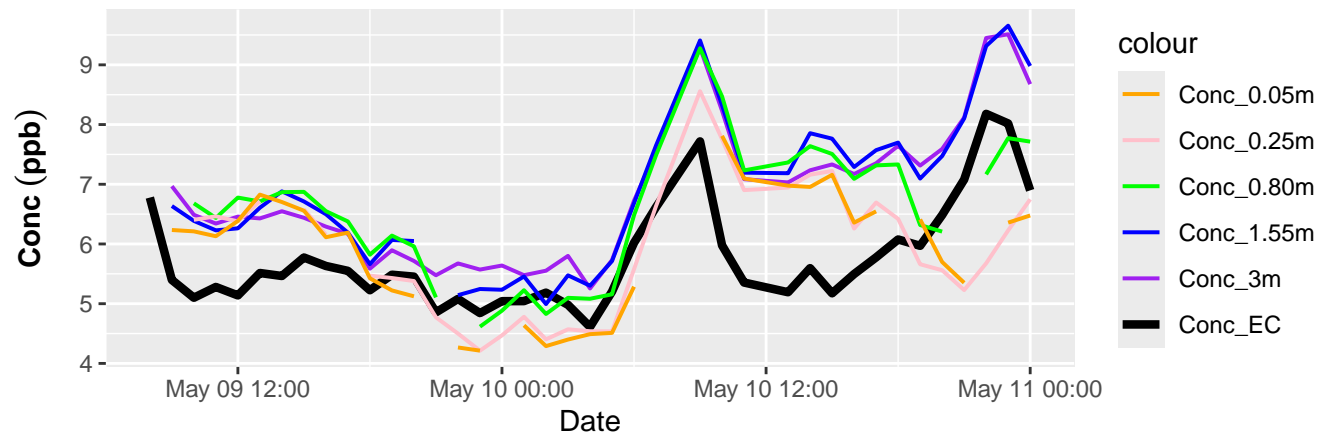

# m33.033

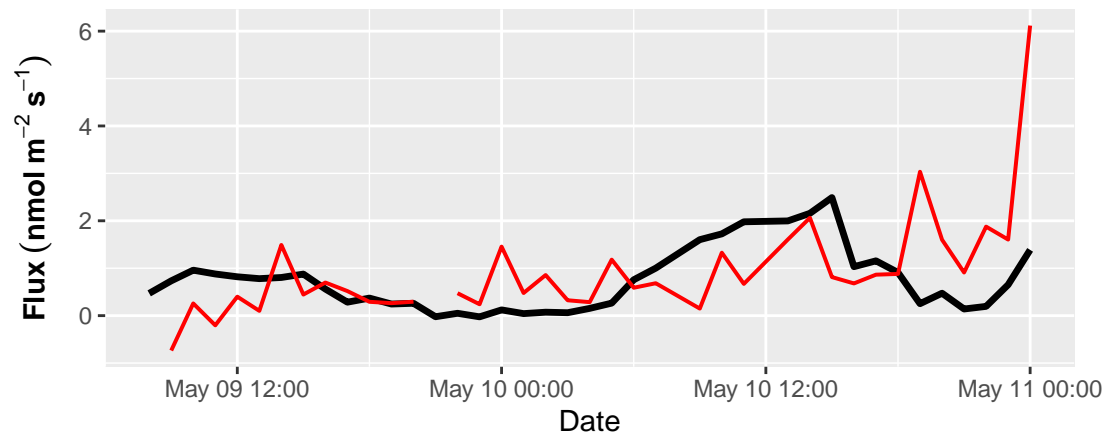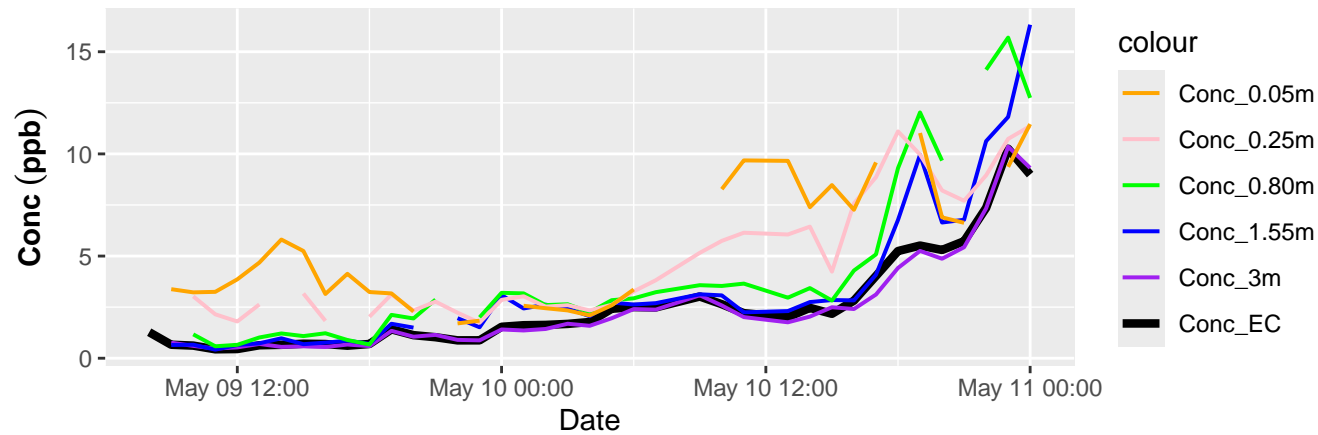

# m41.038

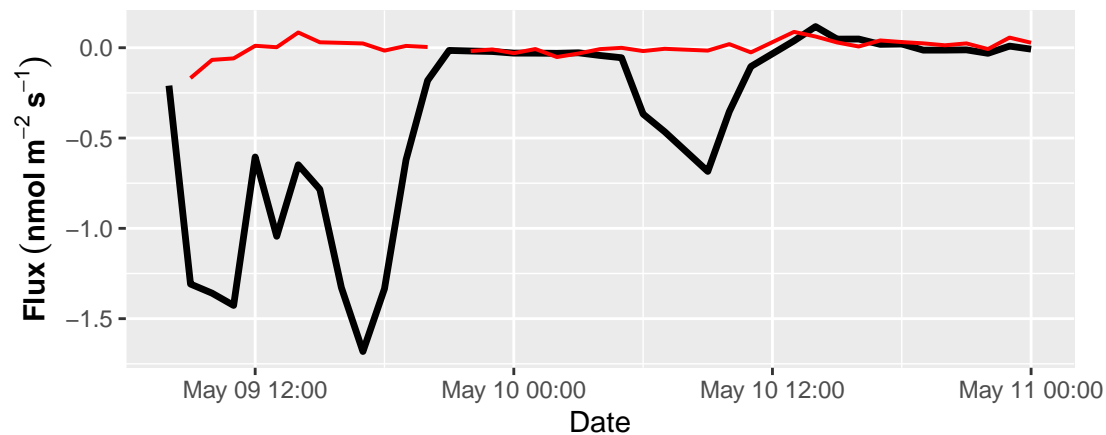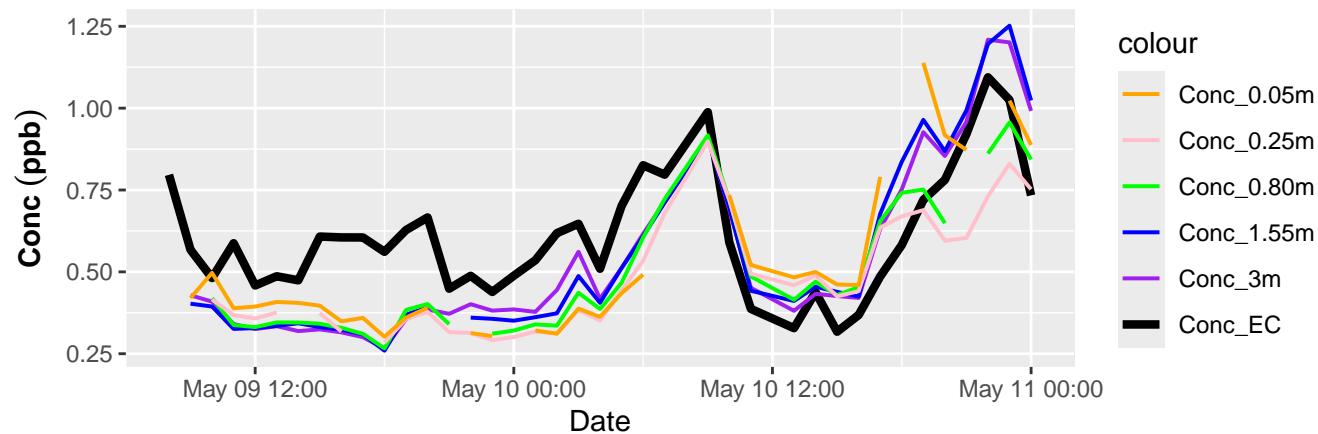

# m43.018

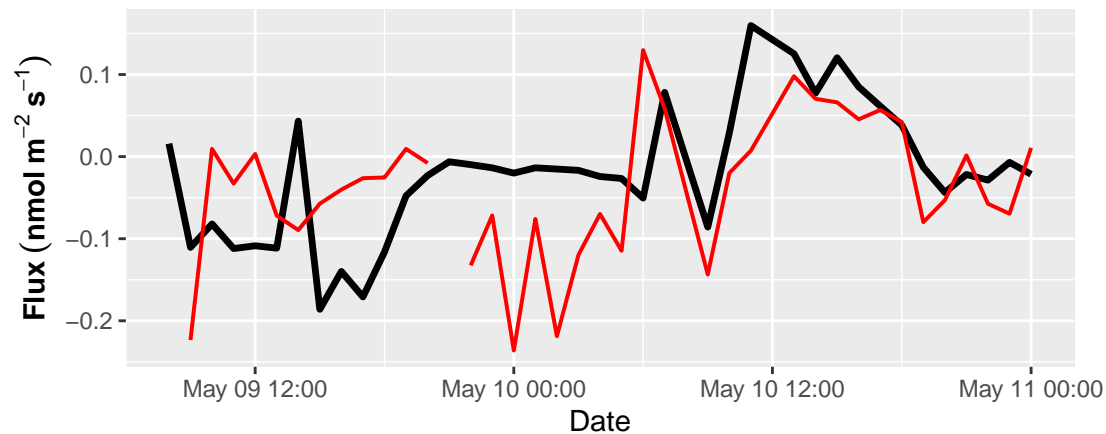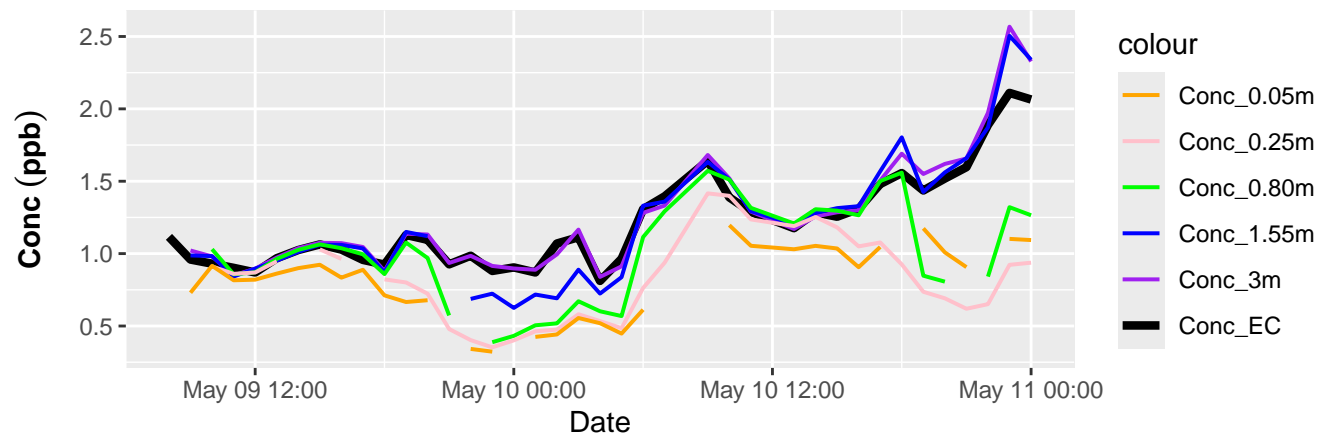

# m45.033

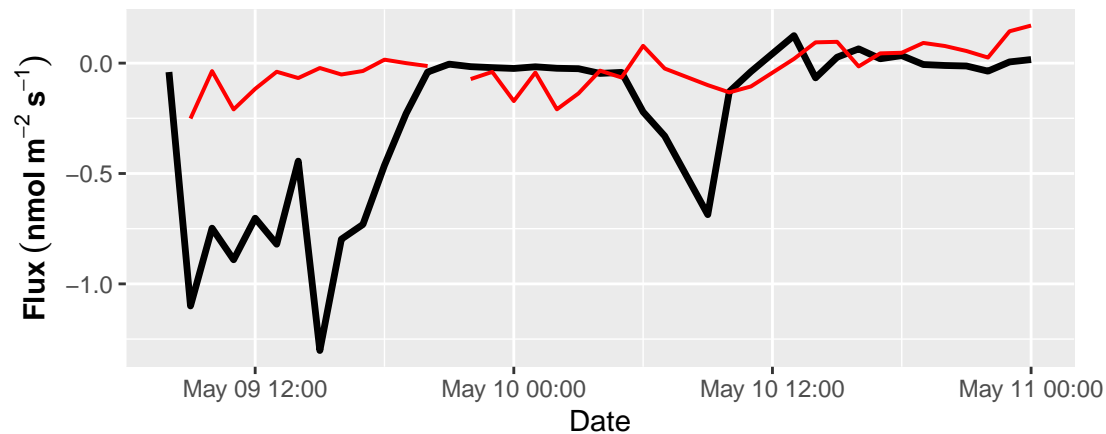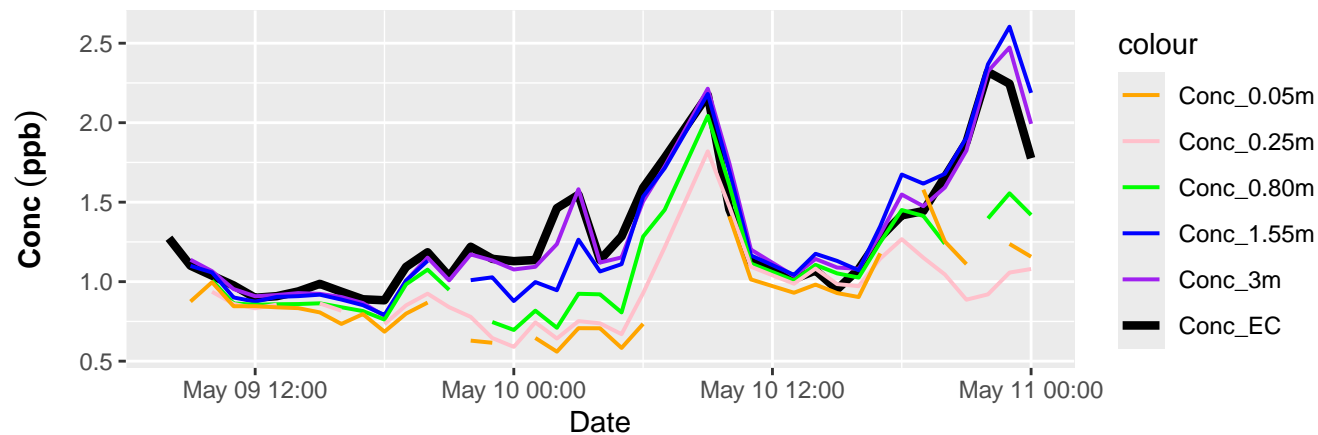

# m47.013

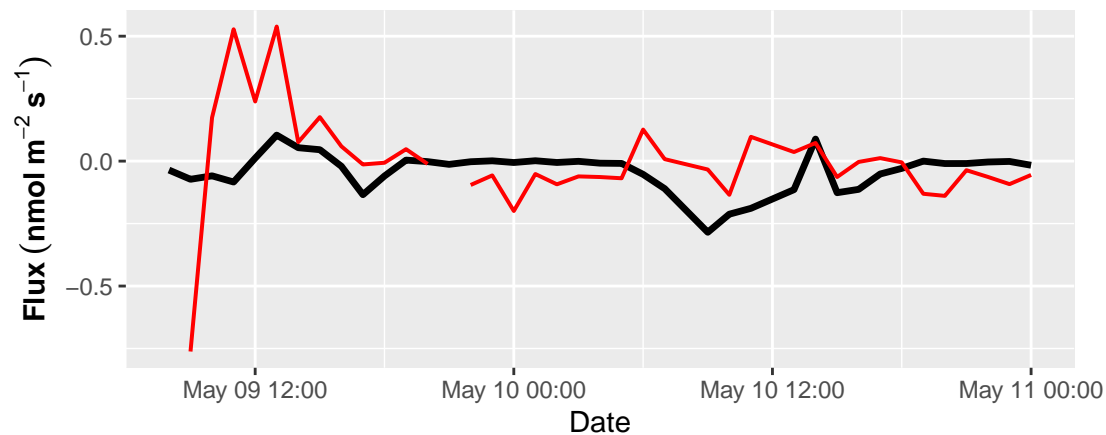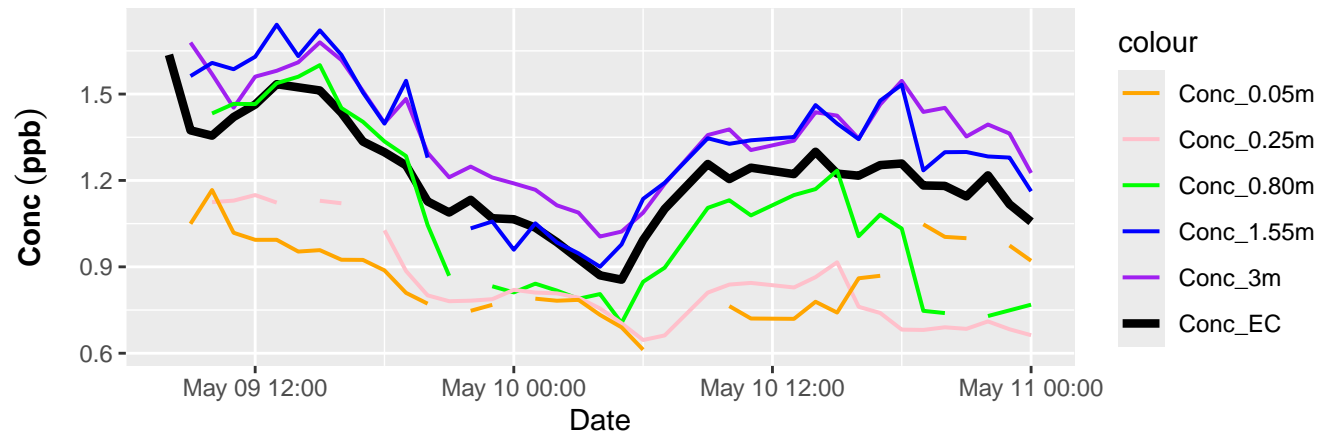

# m49.014

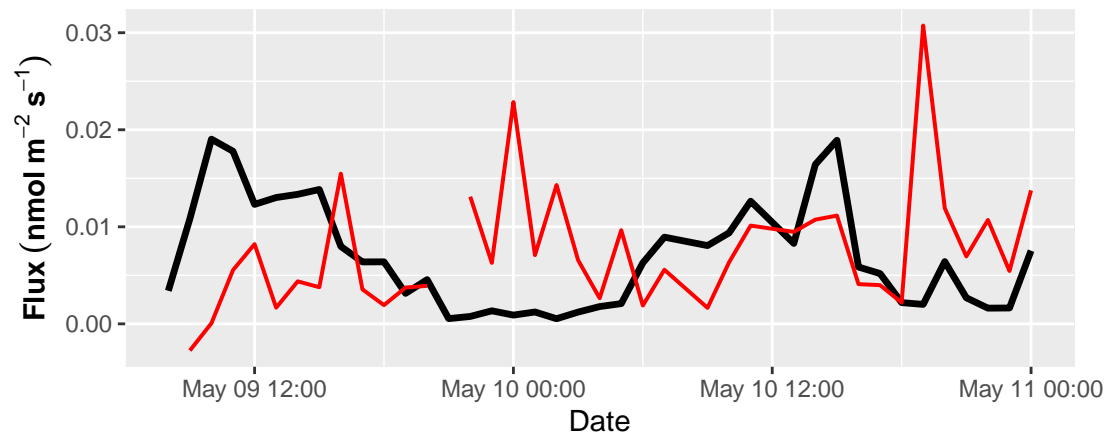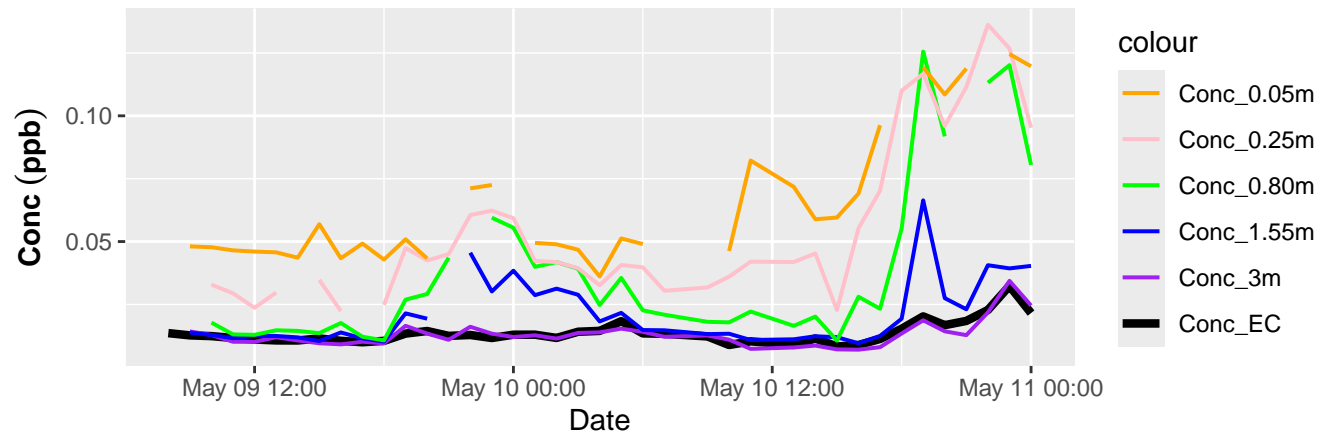

# m51.022

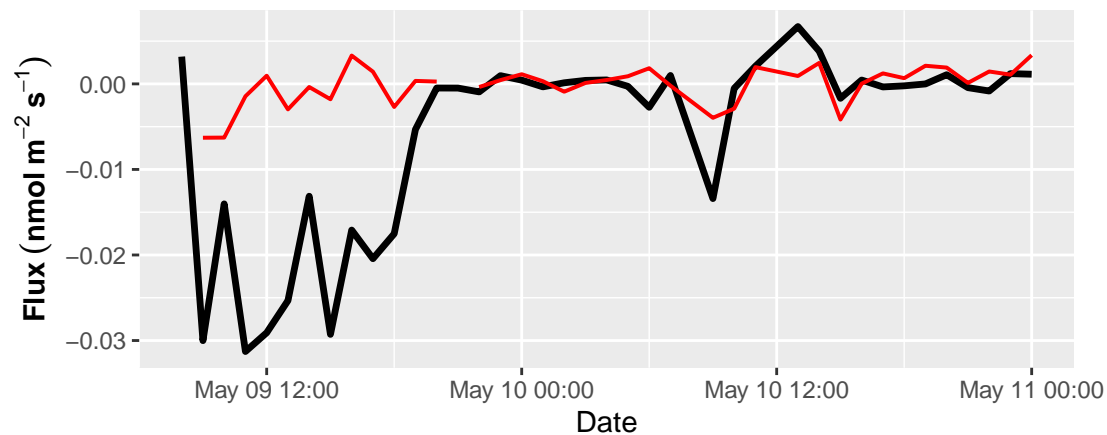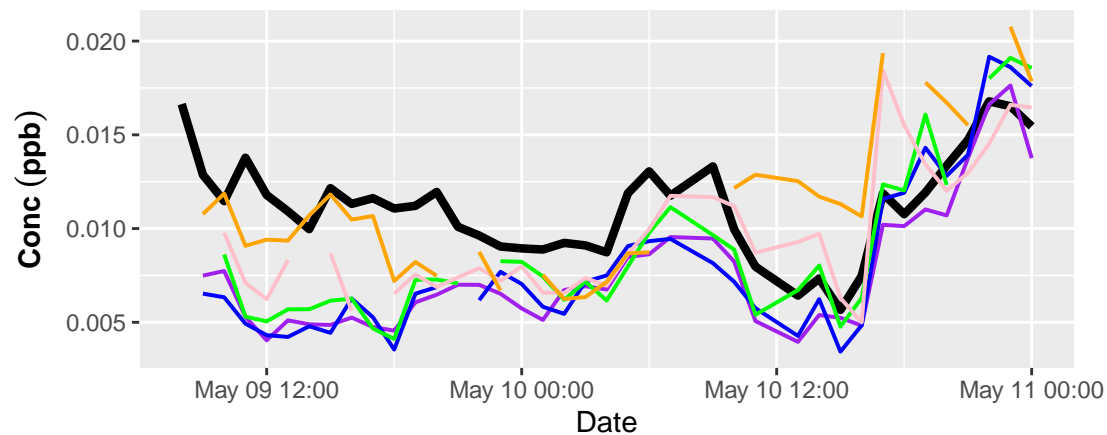



**m57.069**

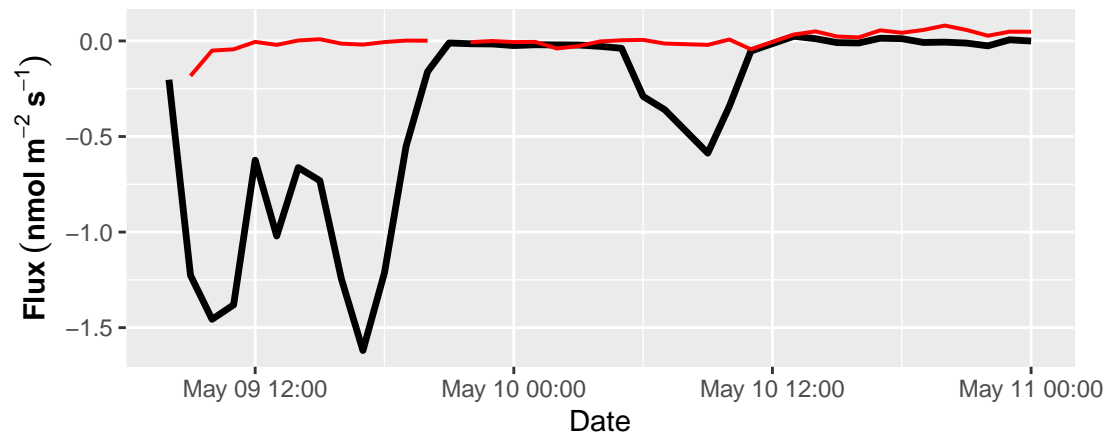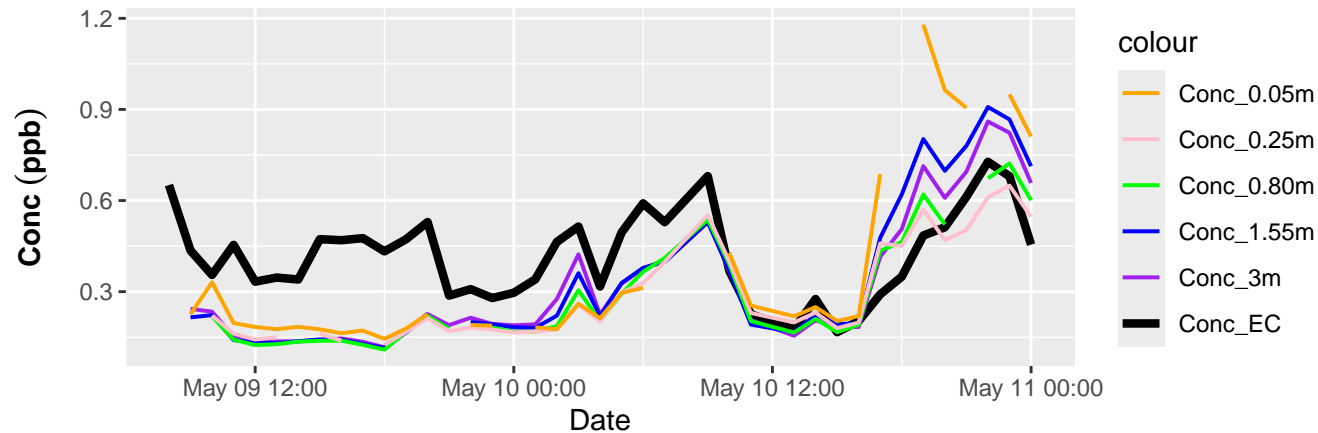

**m59.049**

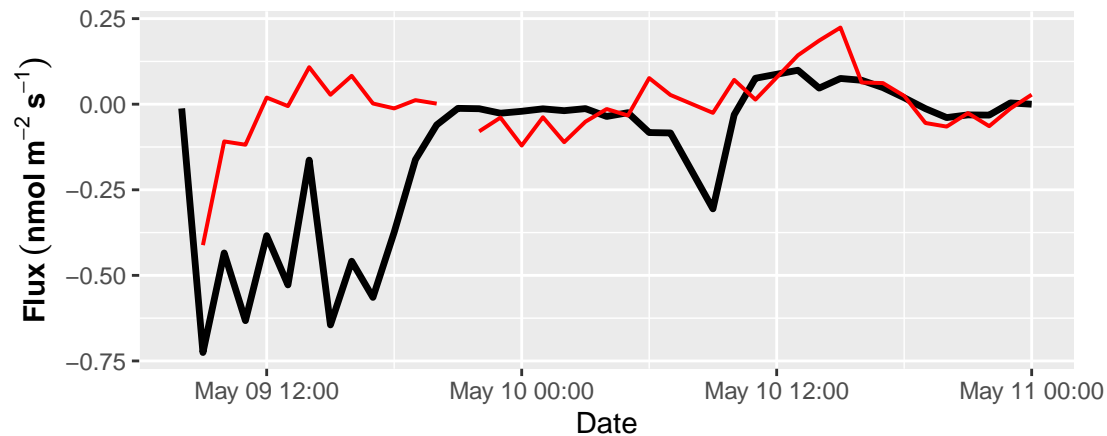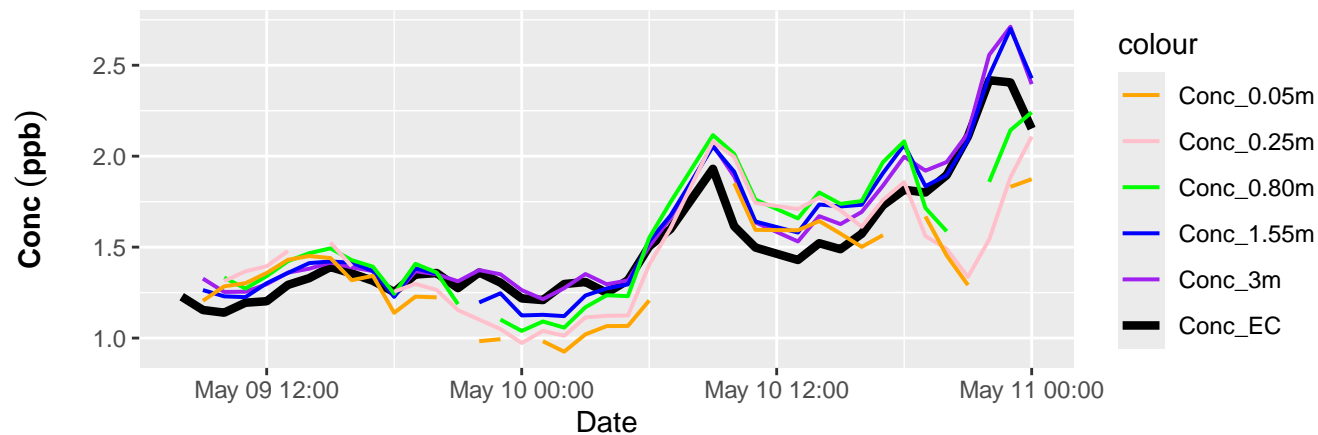

**m60.048**

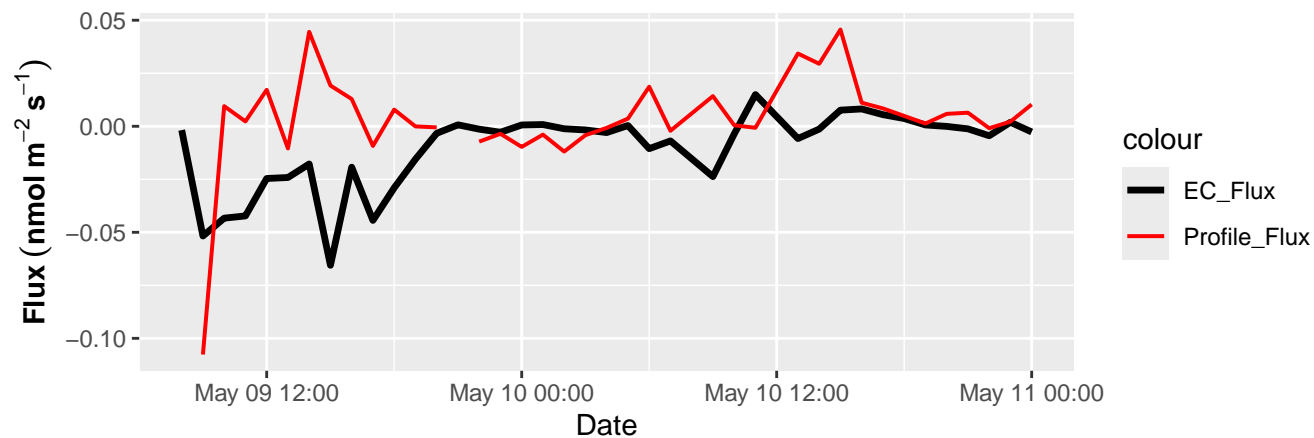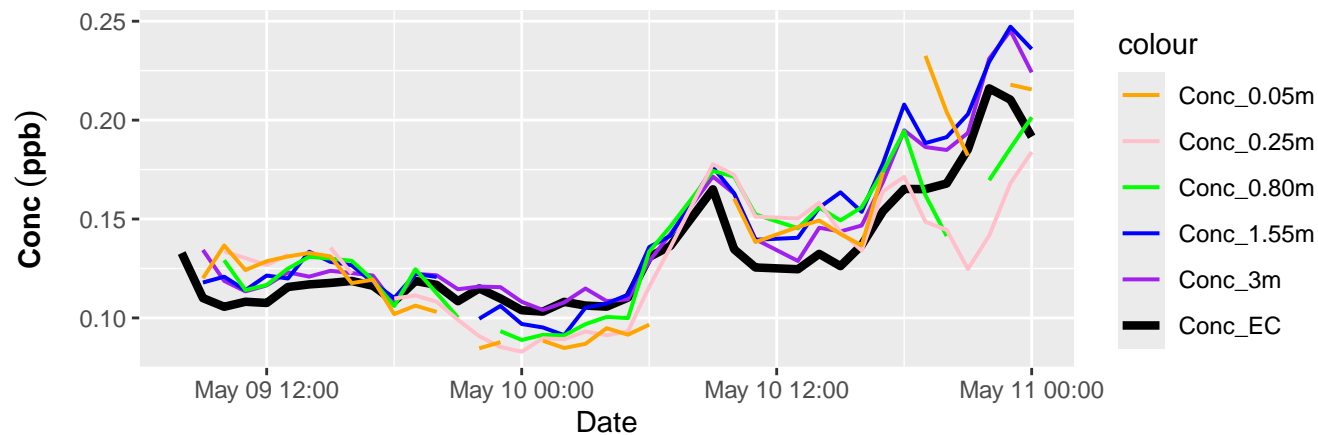

**m61.029**

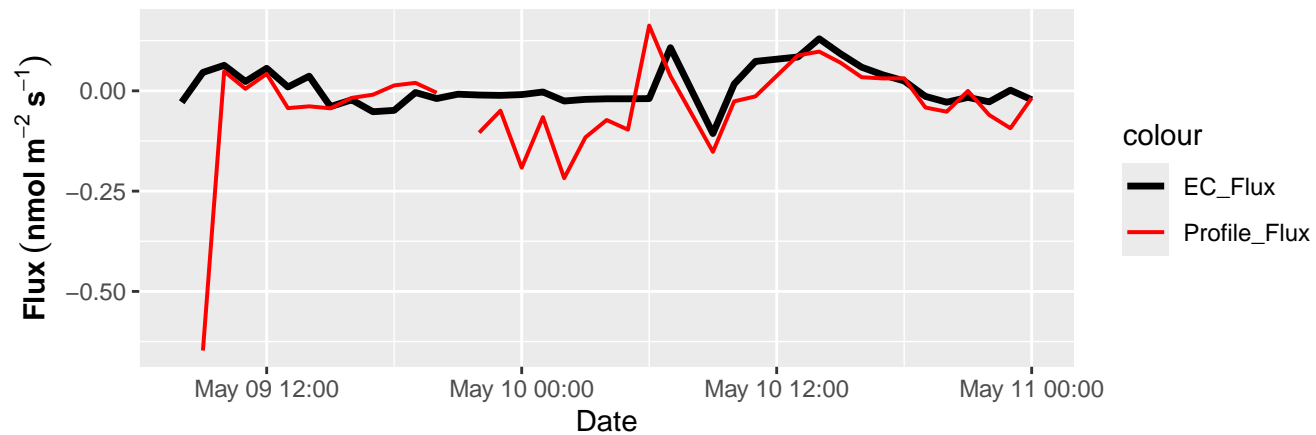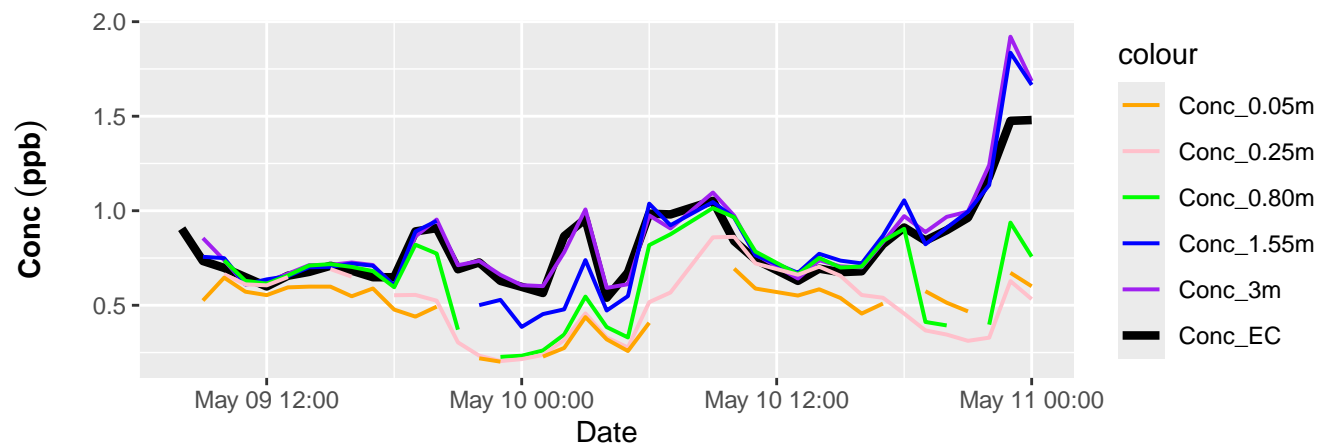

# m62.029

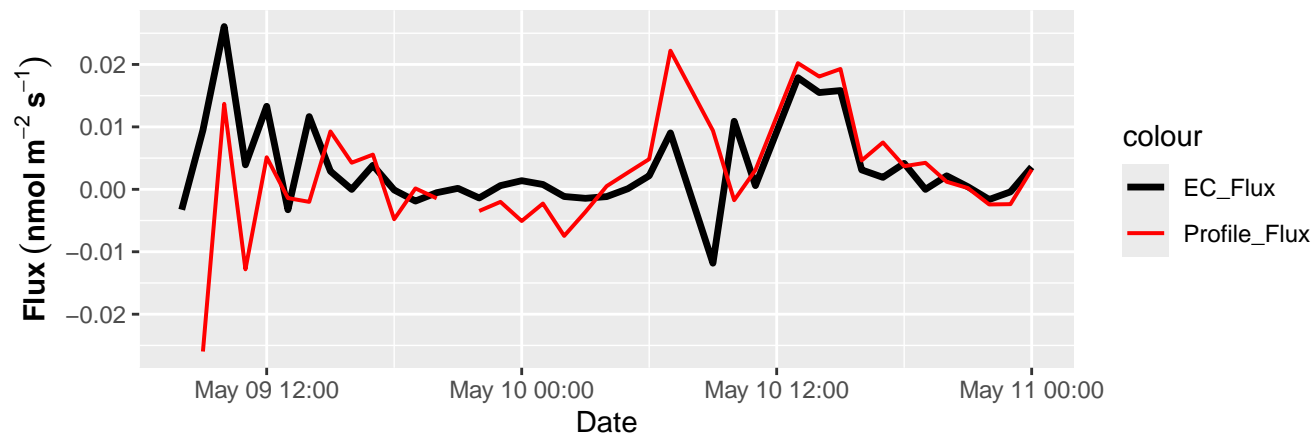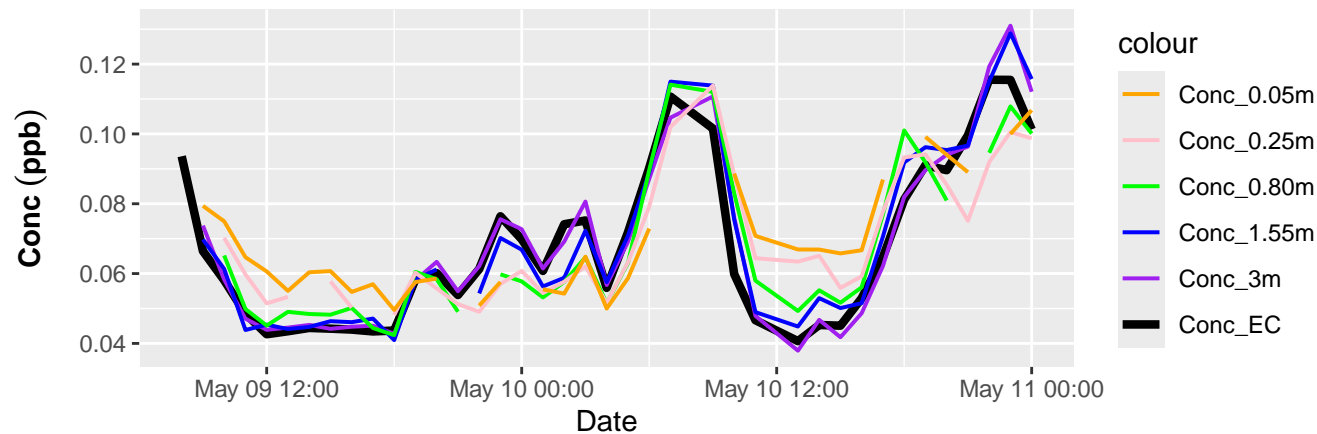

# m63.006

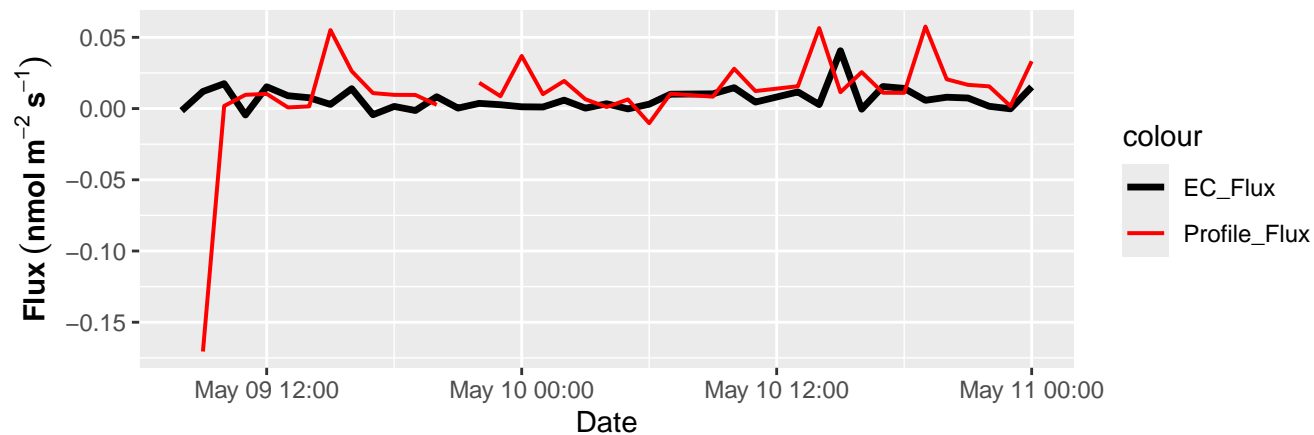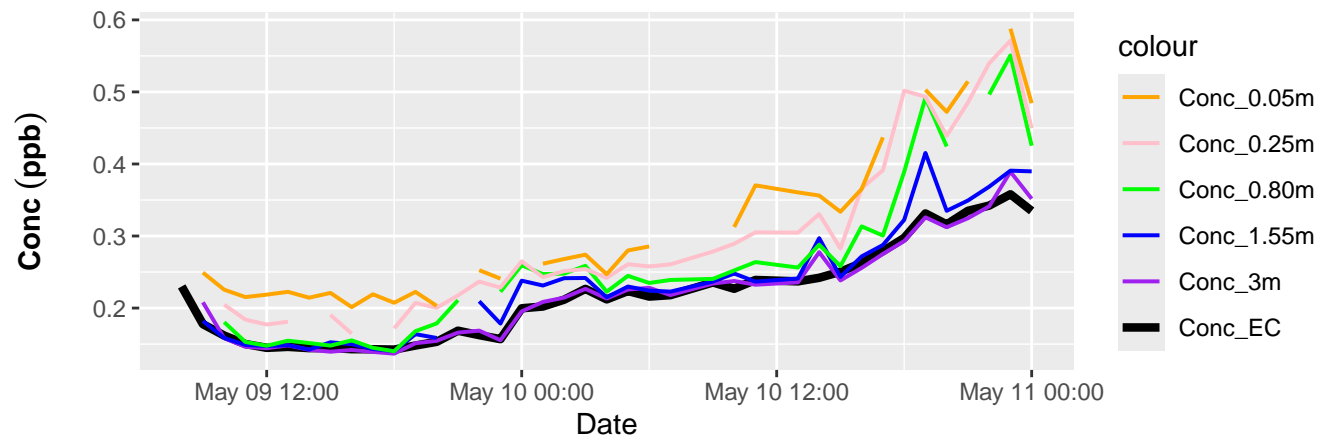

# m67.053

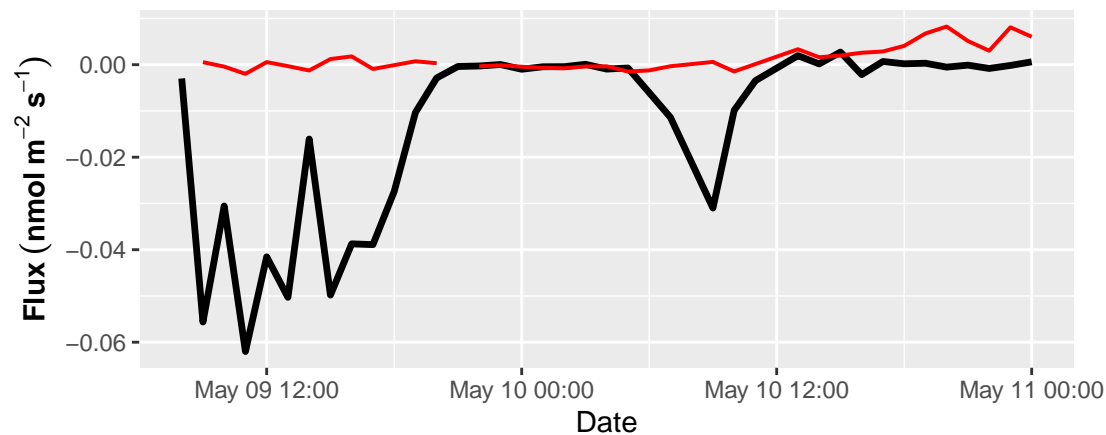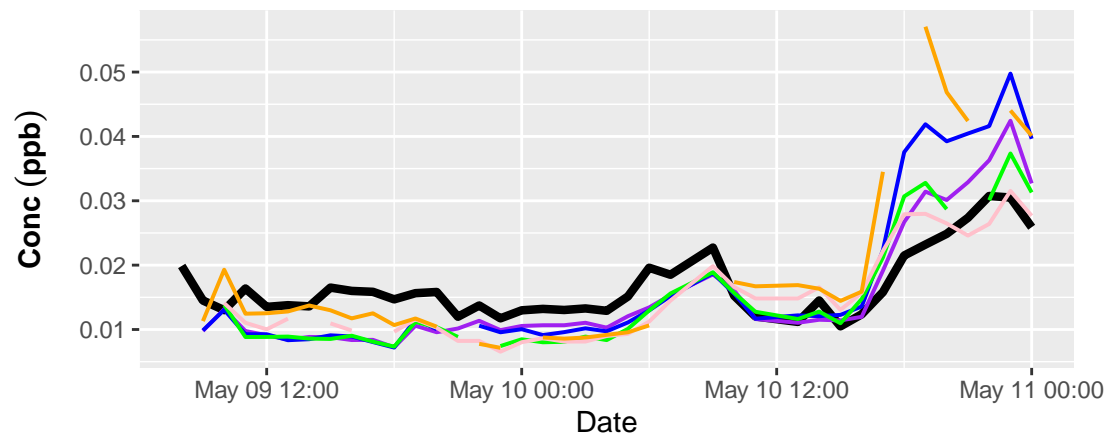

# m69.070

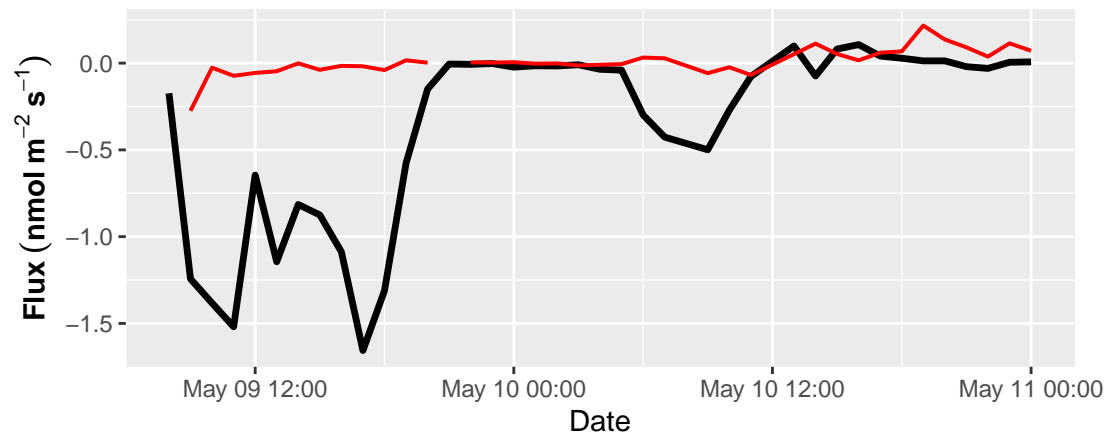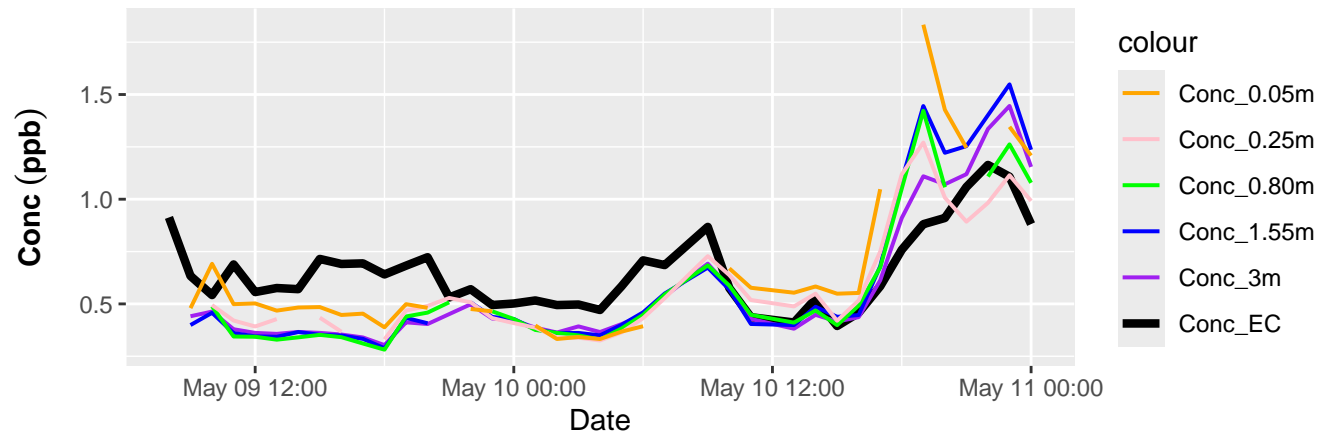



m73.064

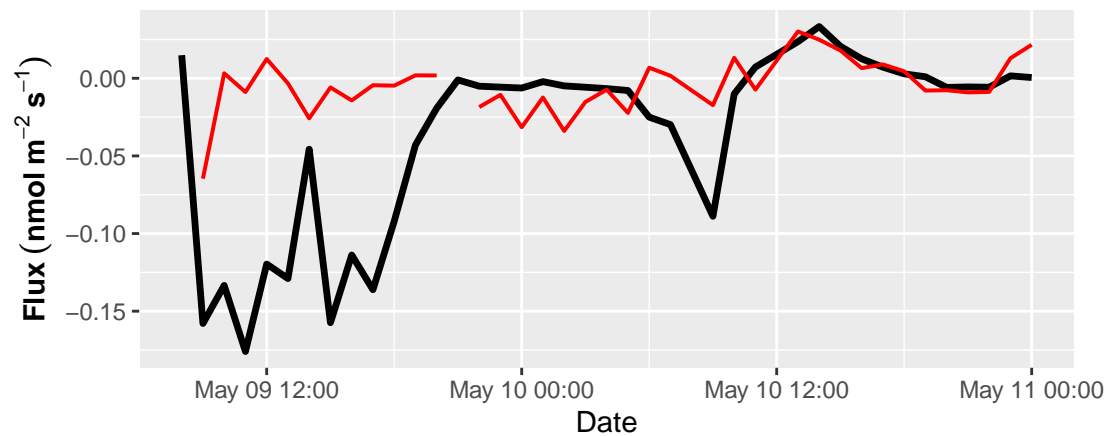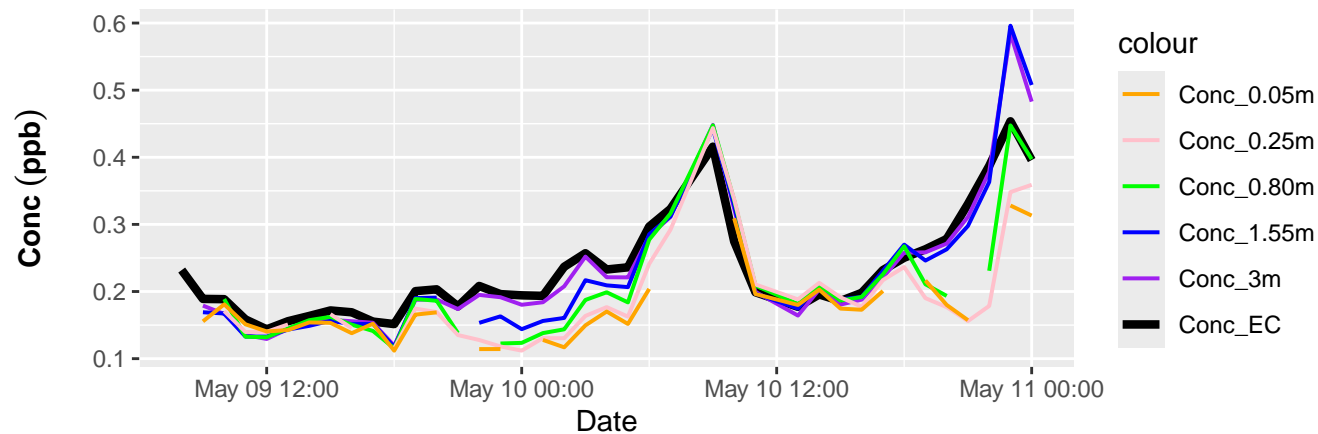

m75.025

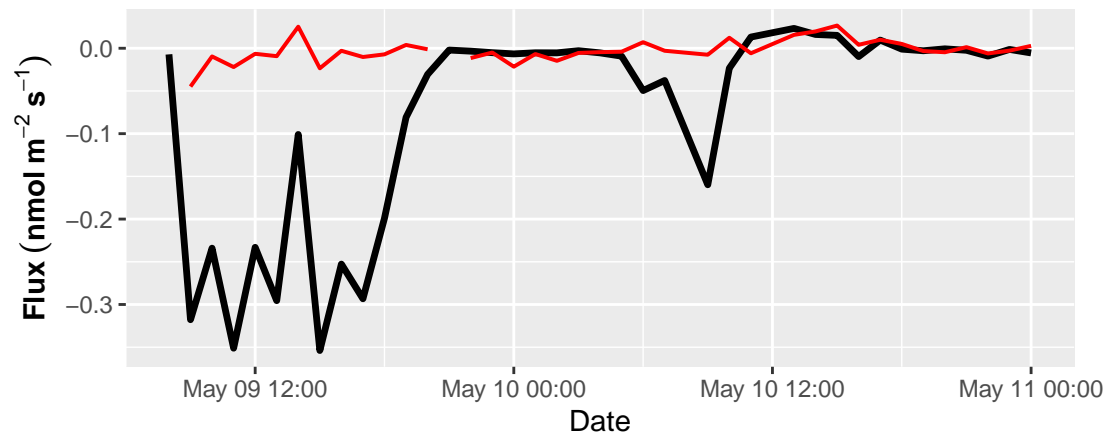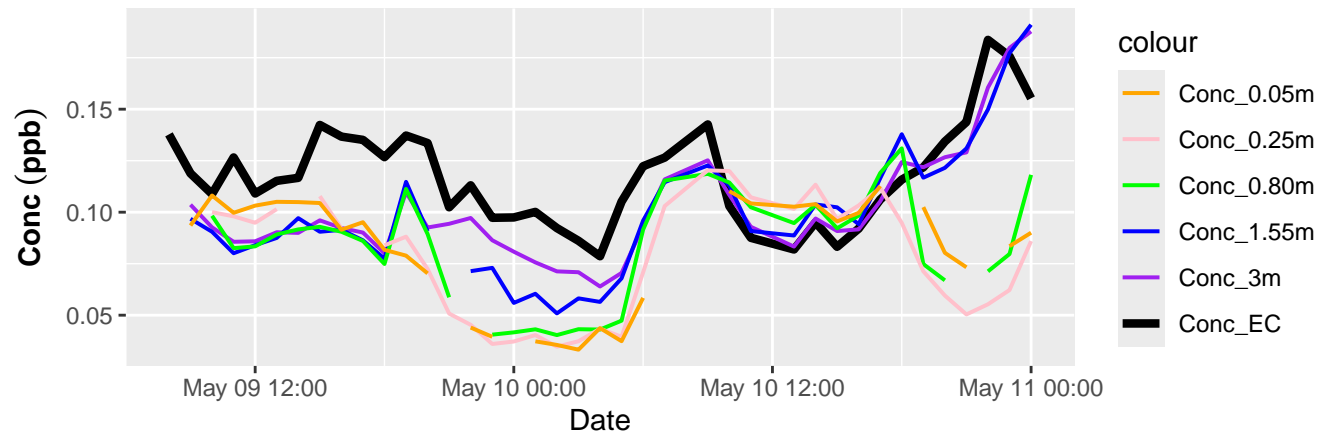

# m77.005

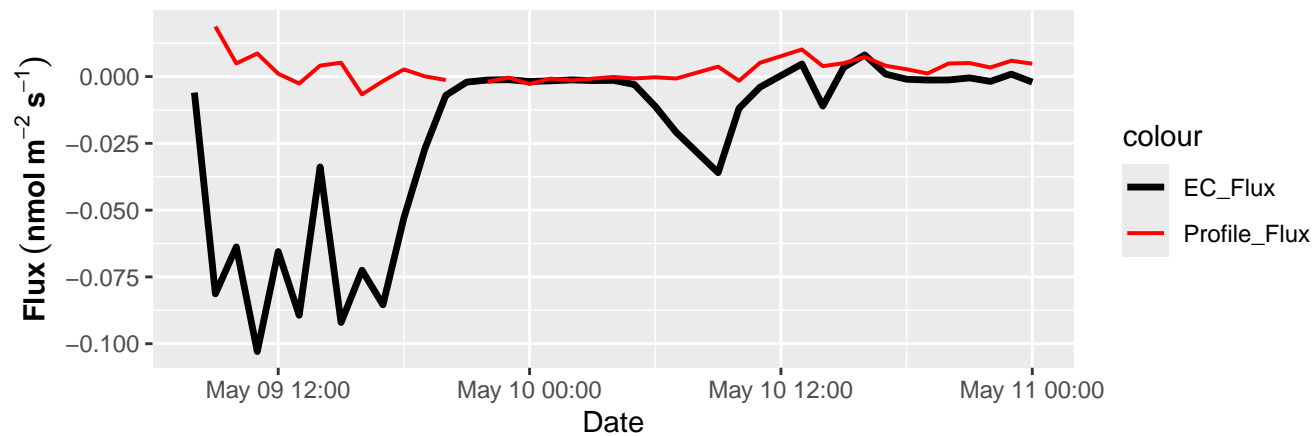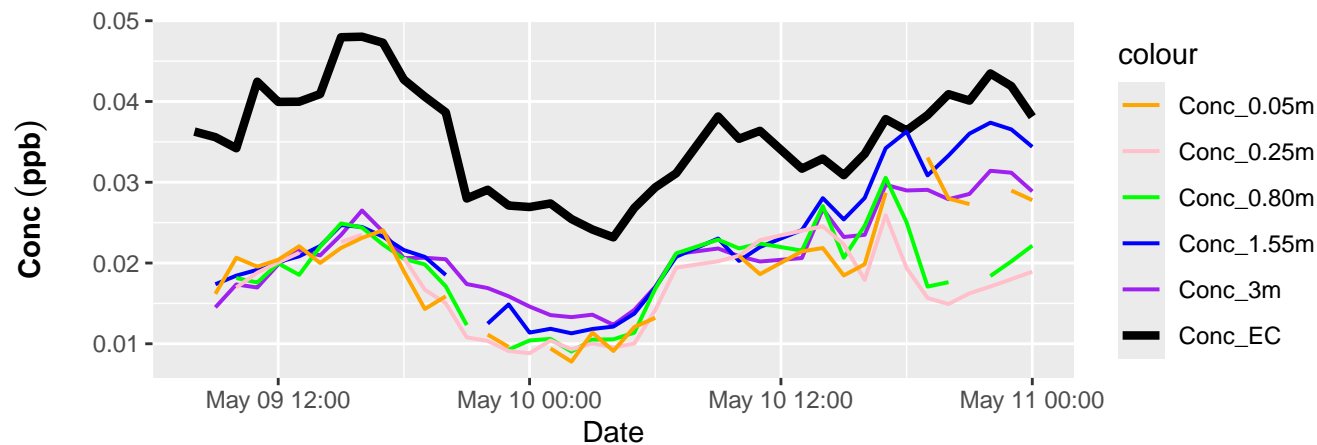

m82.074

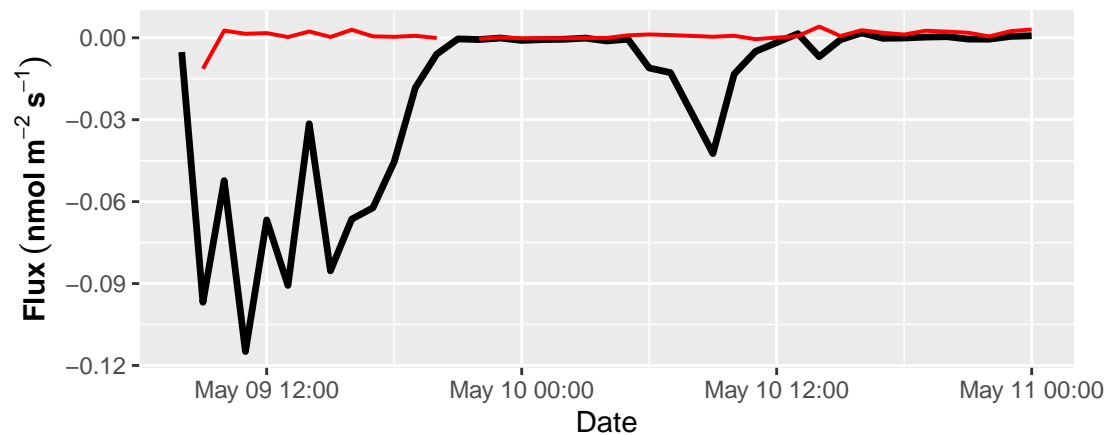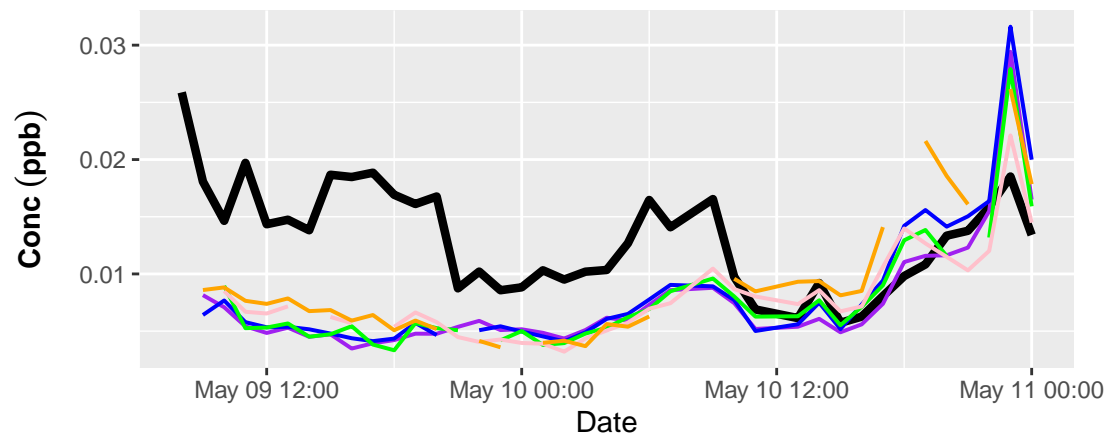

# m83.049

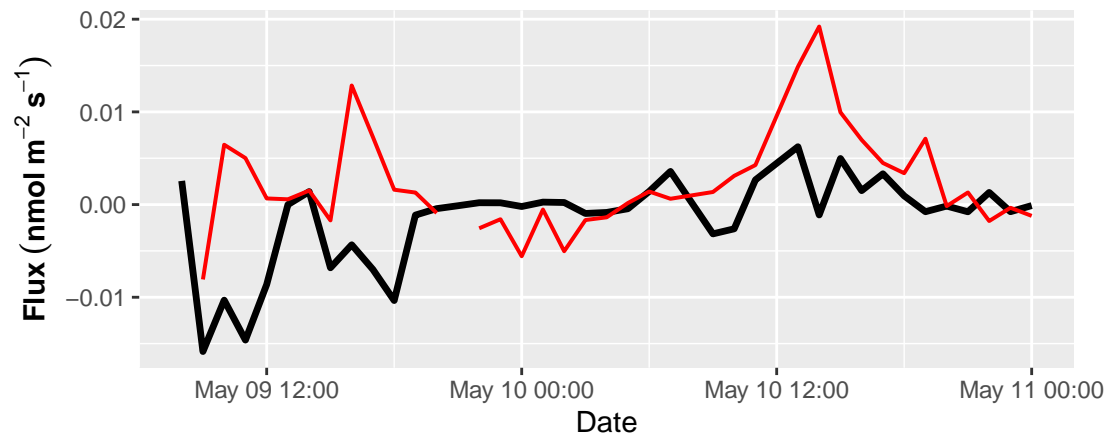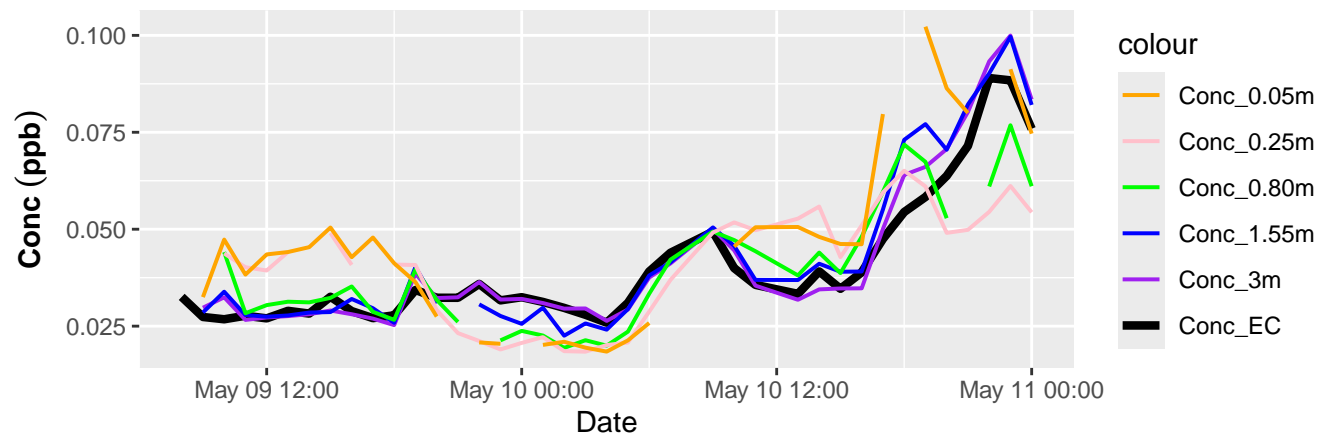

# m83.084

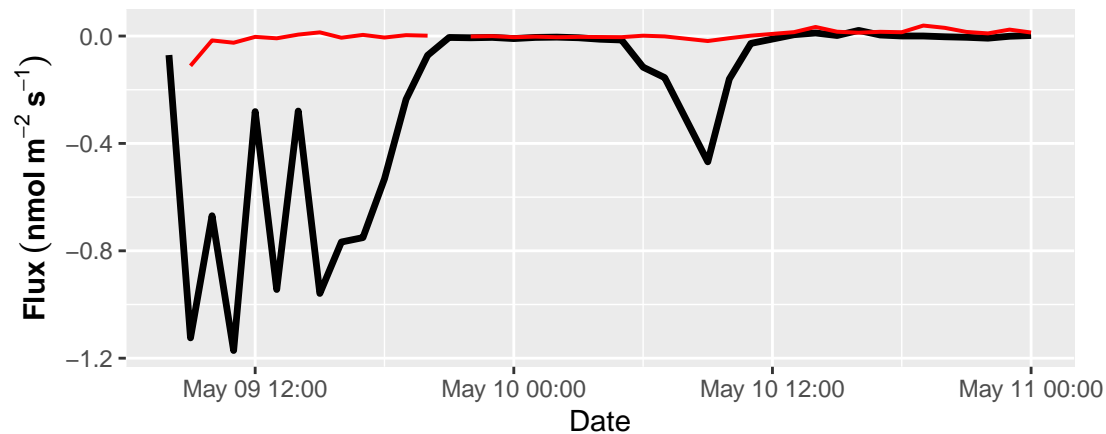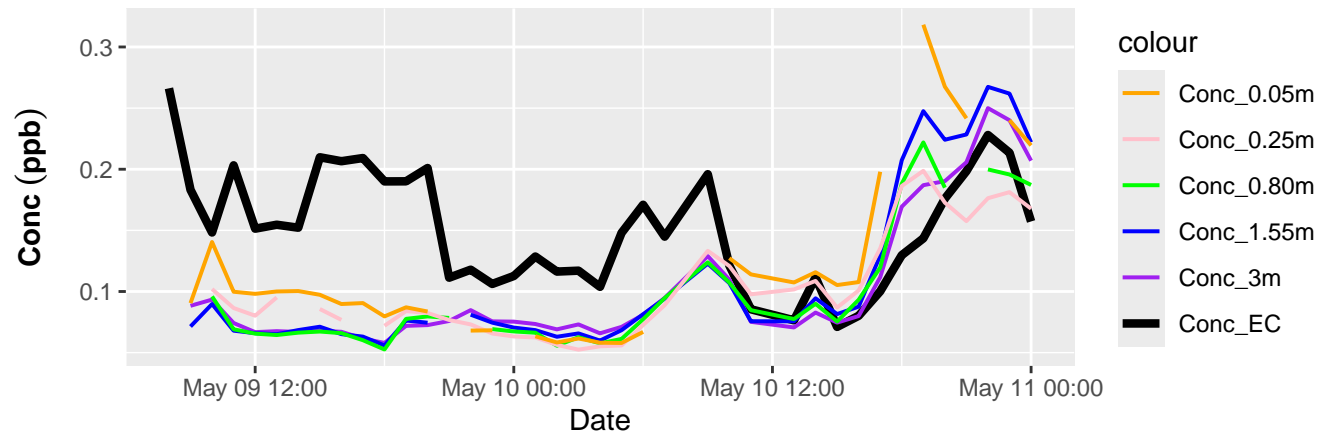

# m87.042

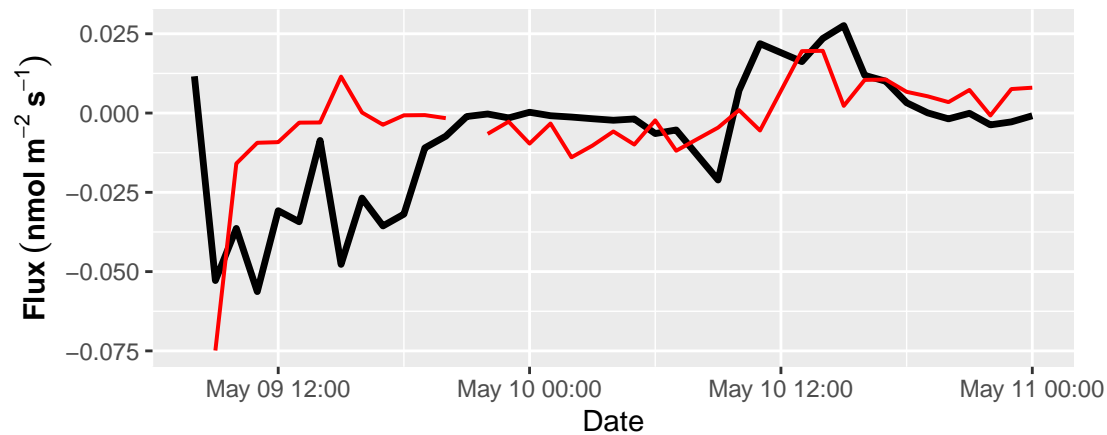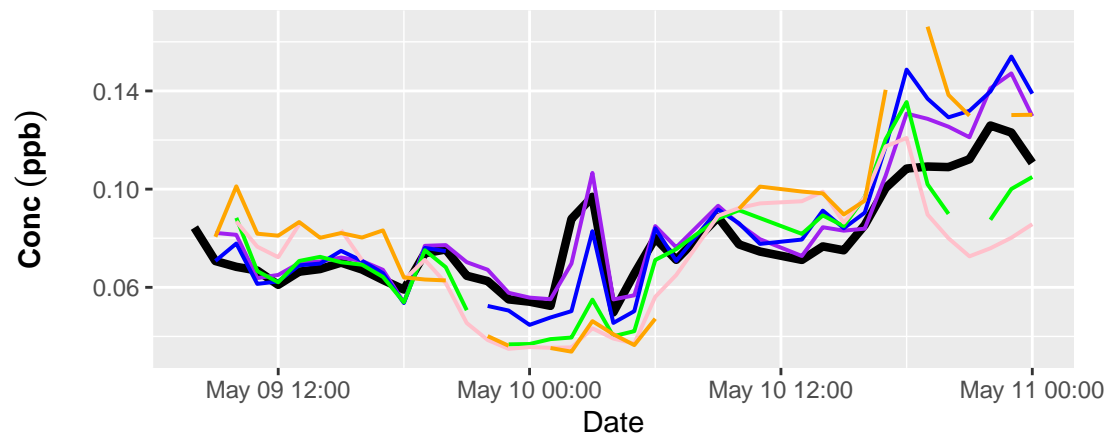

**m87.078**

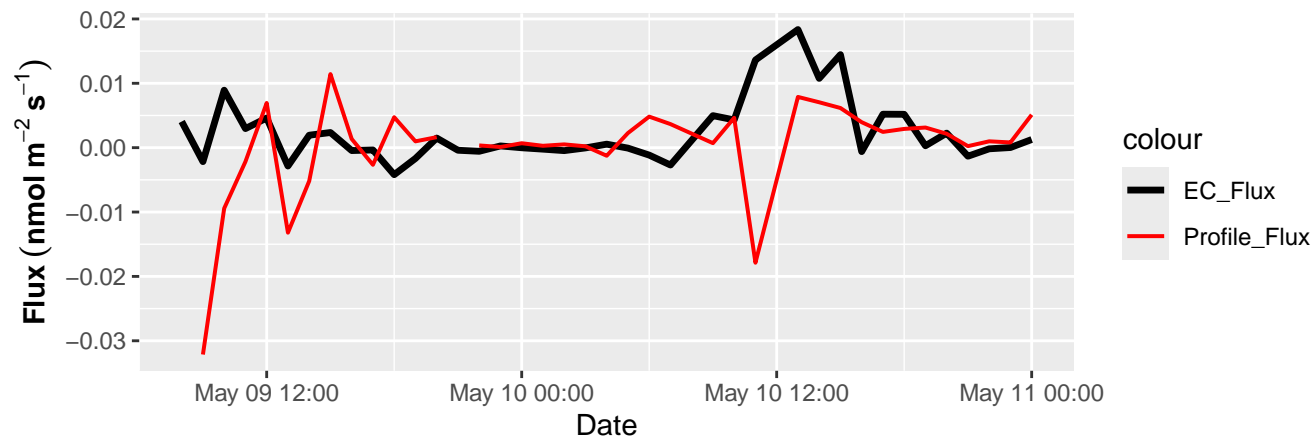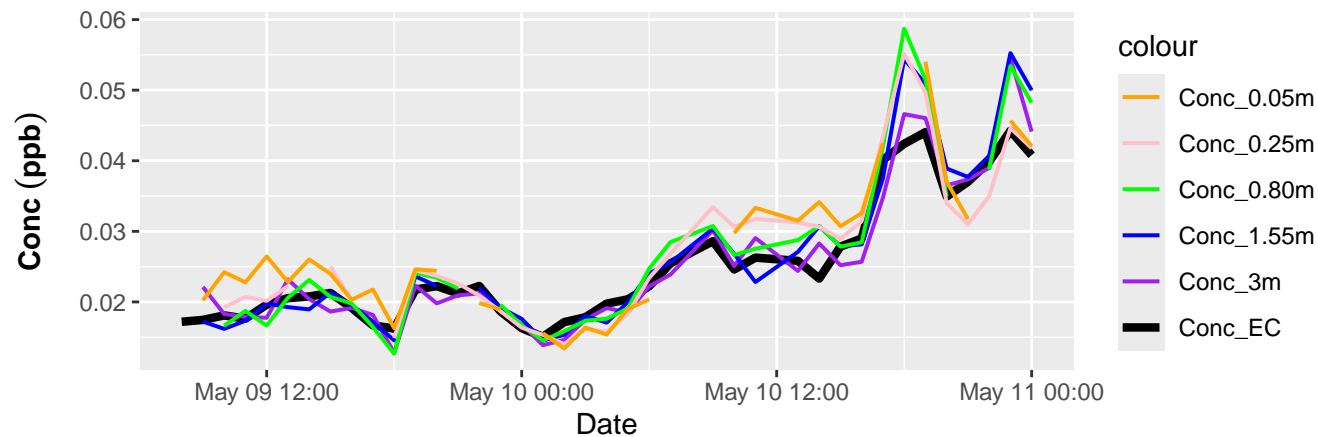



# m93.035

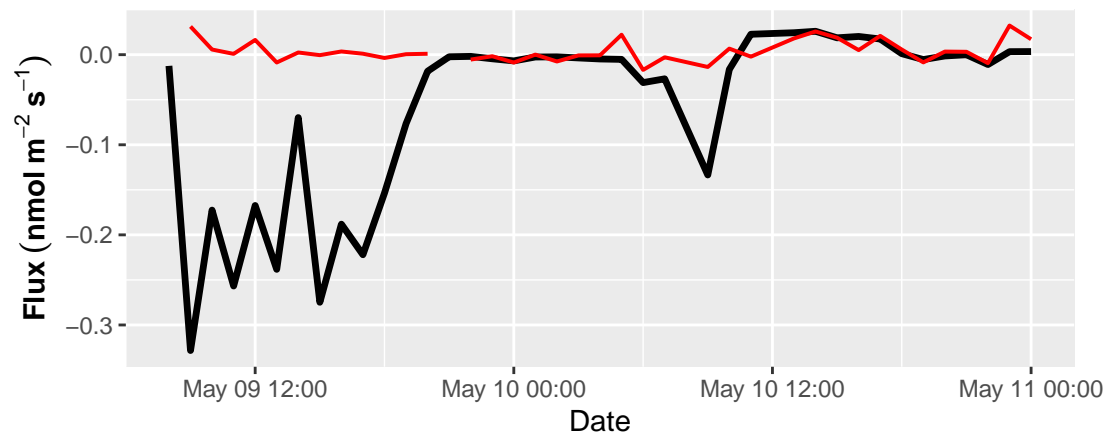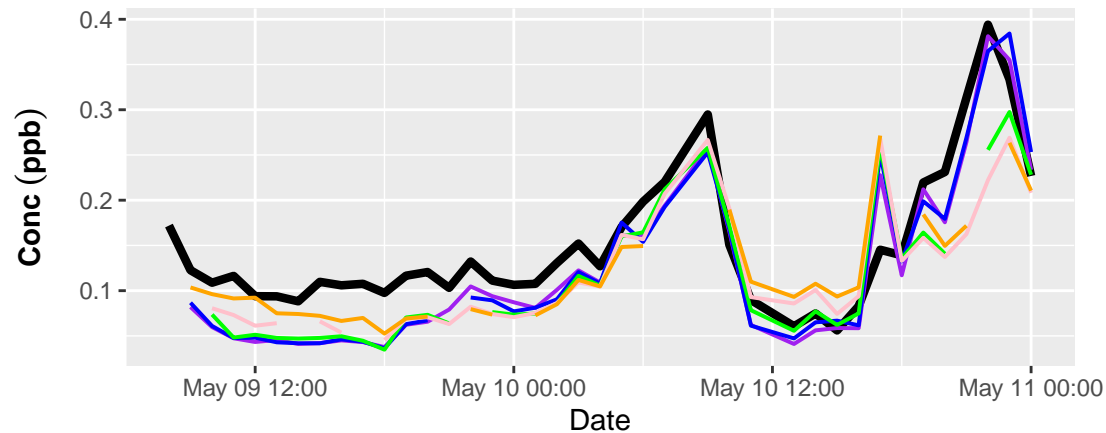

m95.015

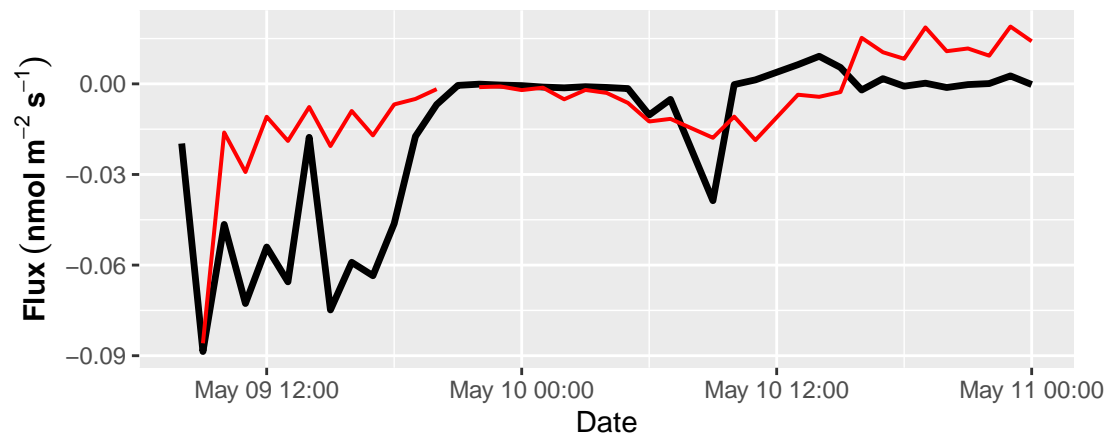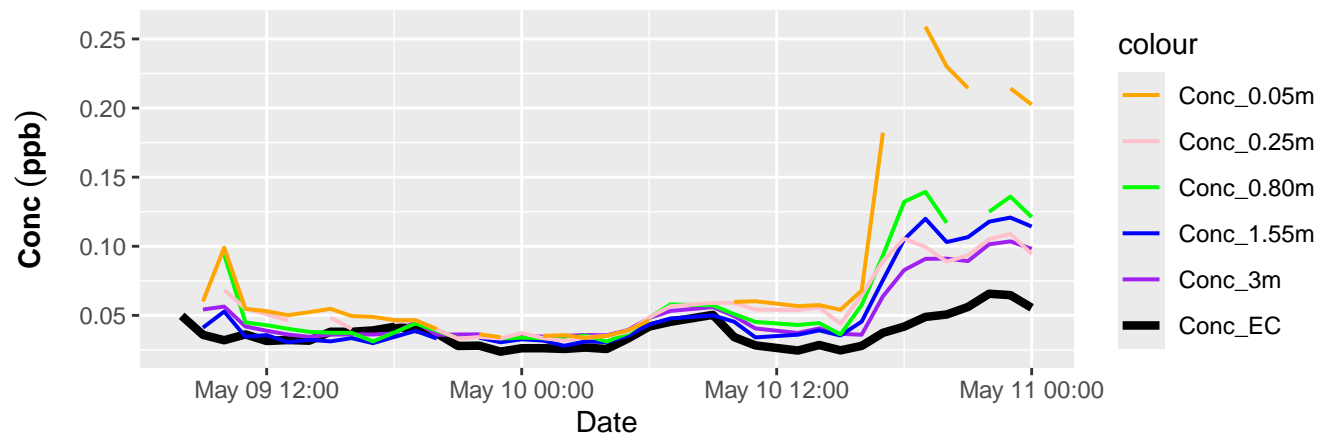

m95.083

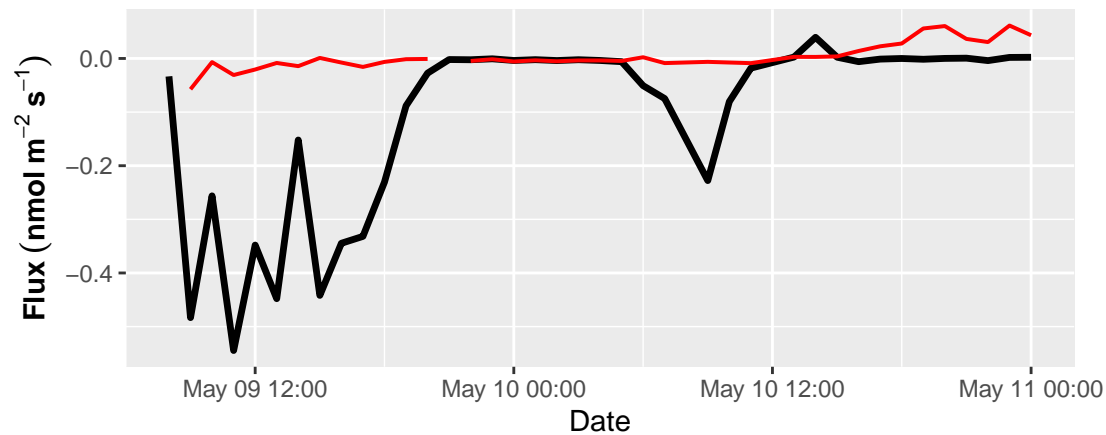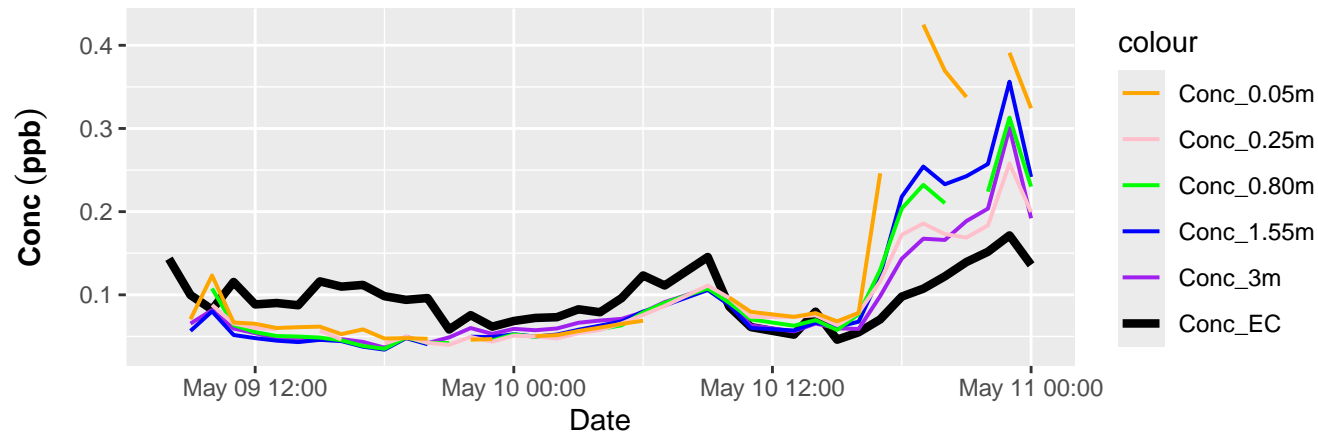

**m99.008**

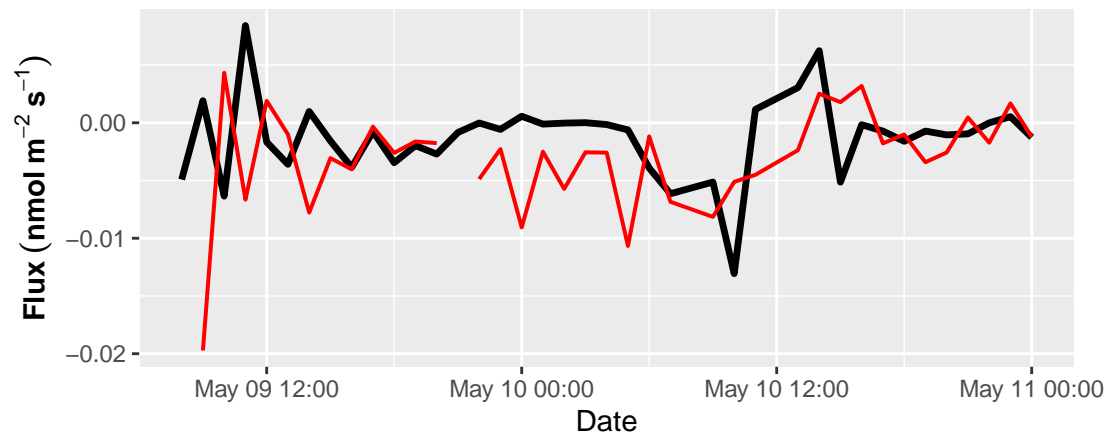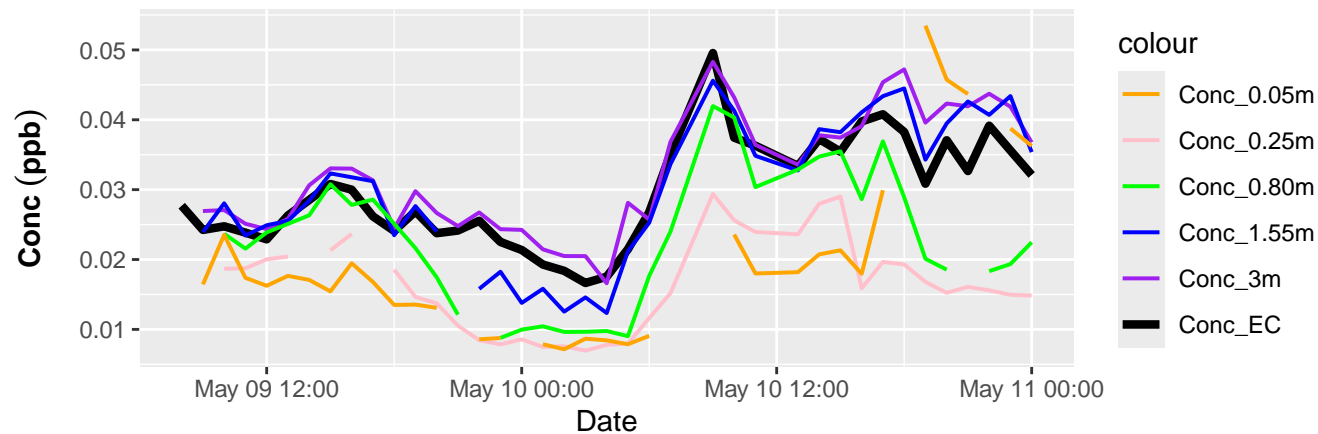

# m101.059

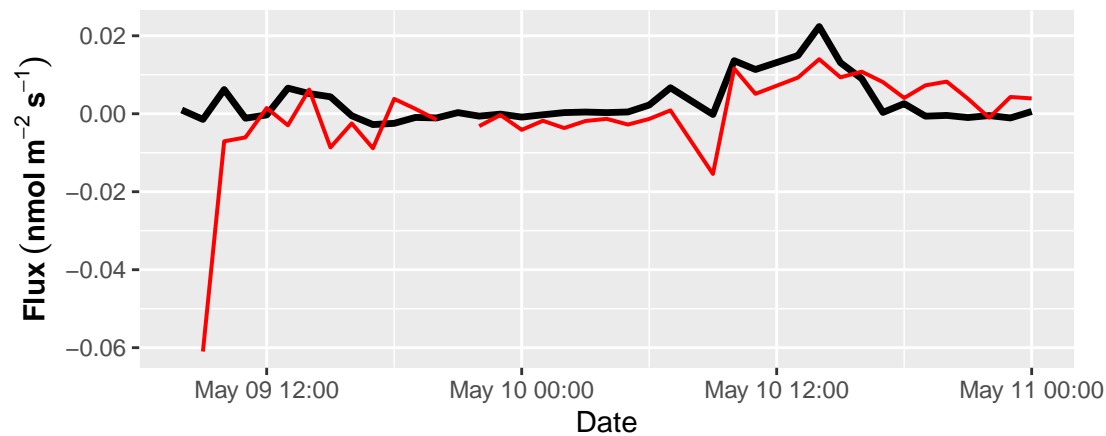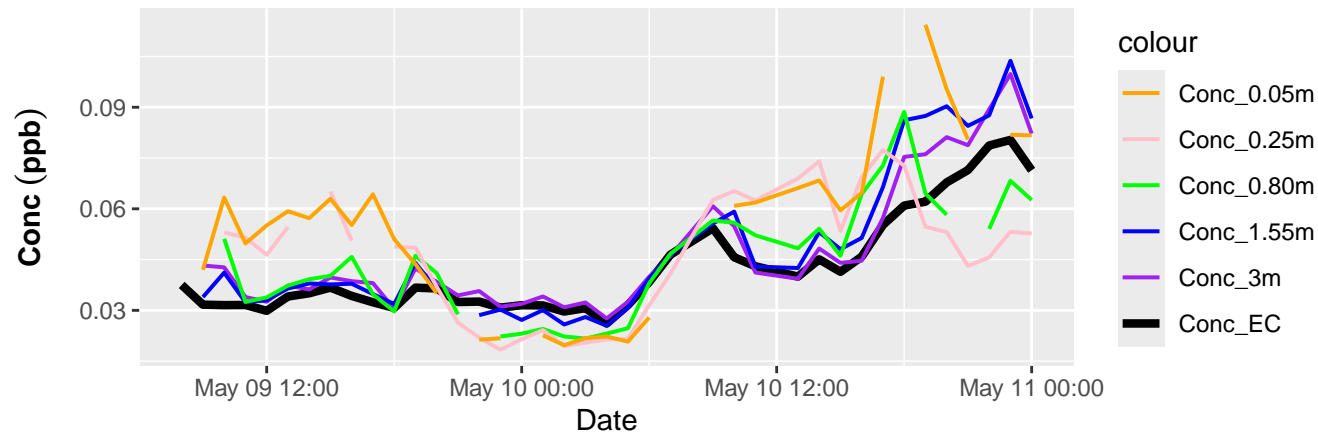

**m103.074**

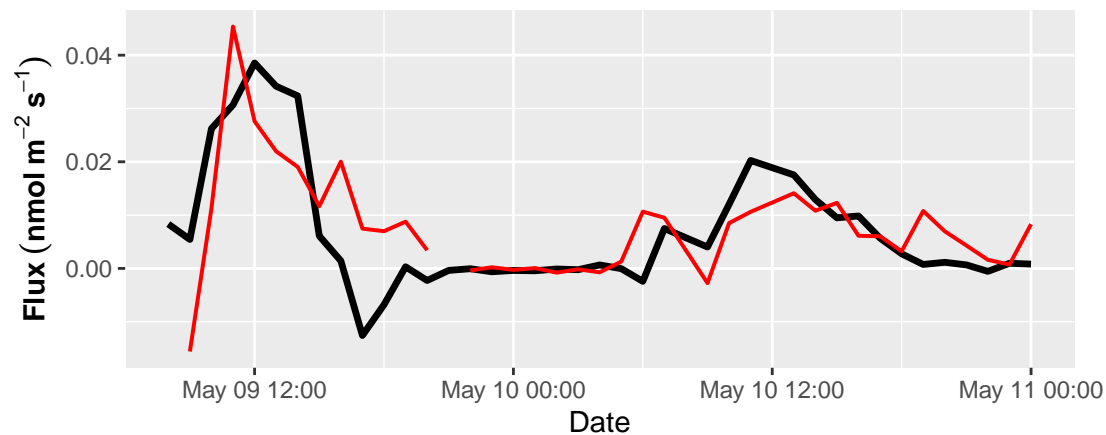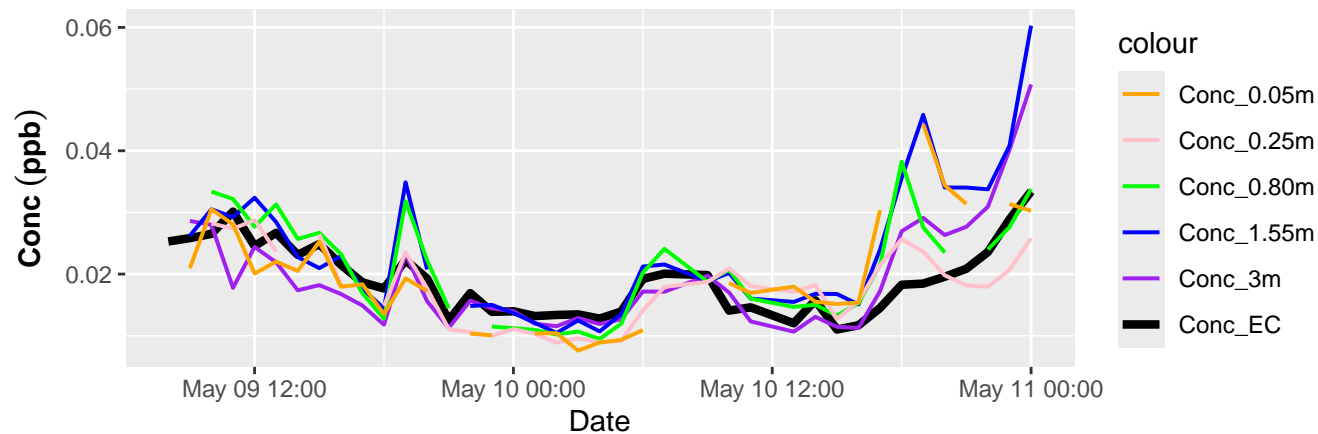

# m105.066

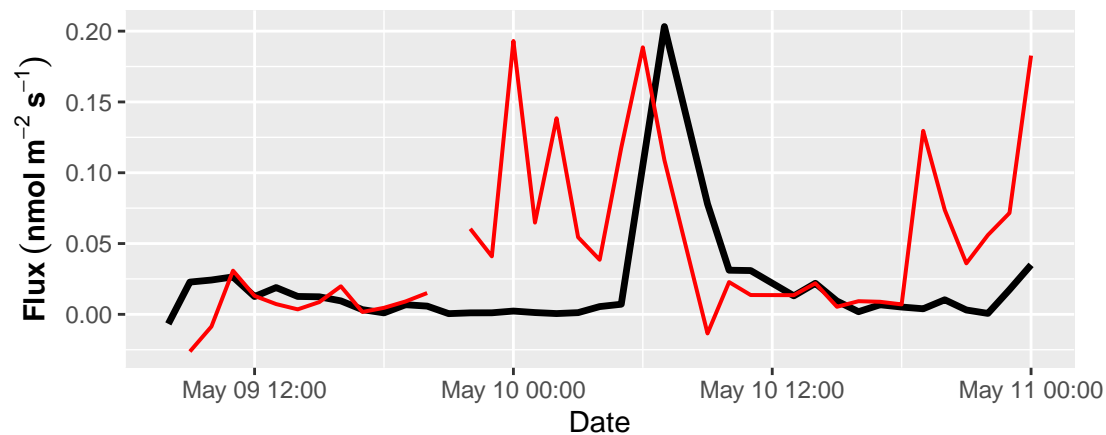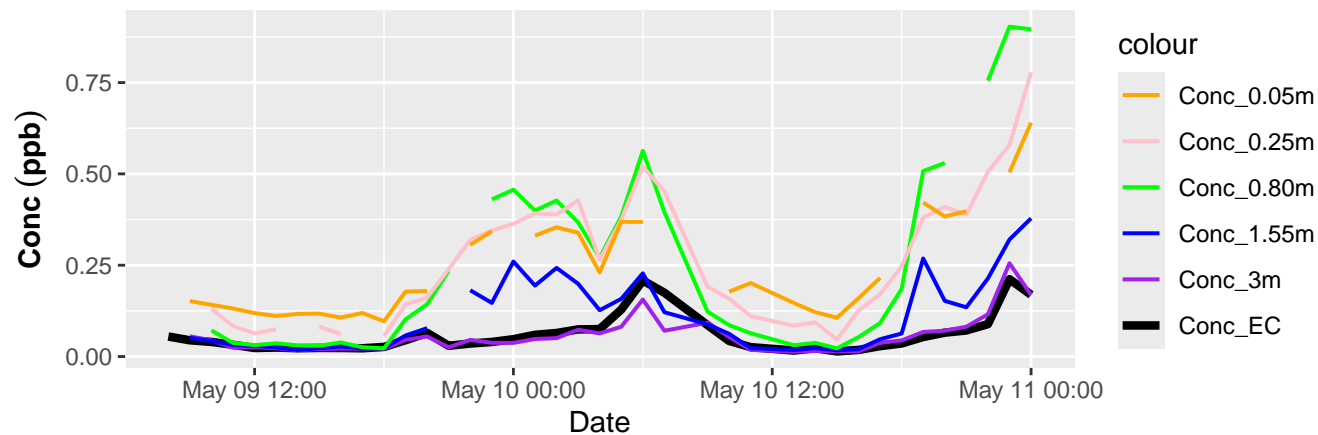

# m109.100

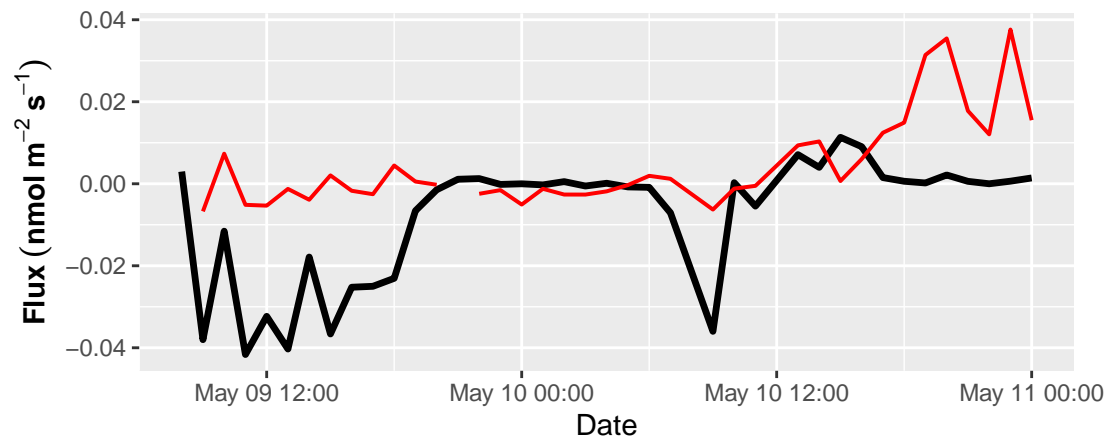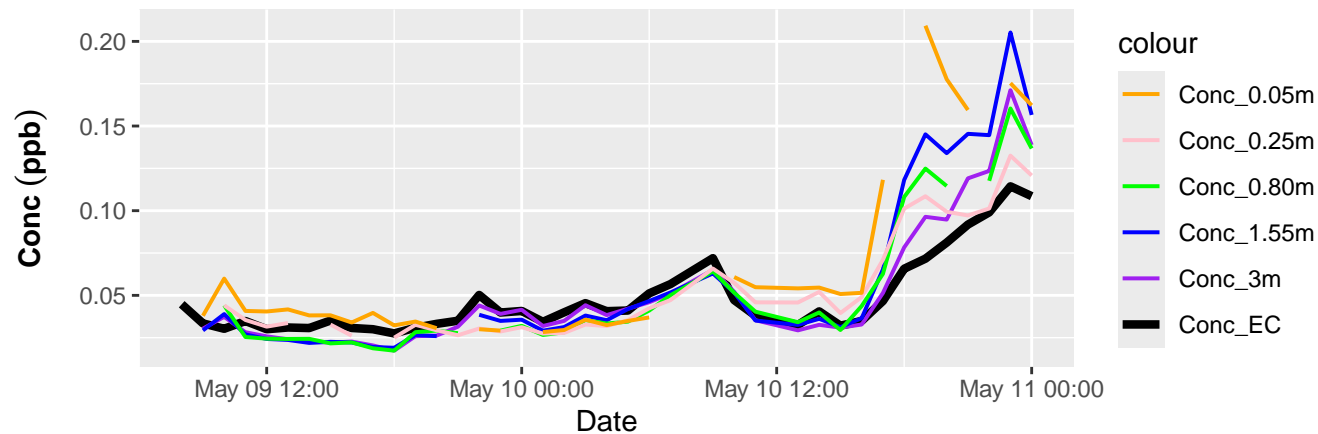



# m115.078

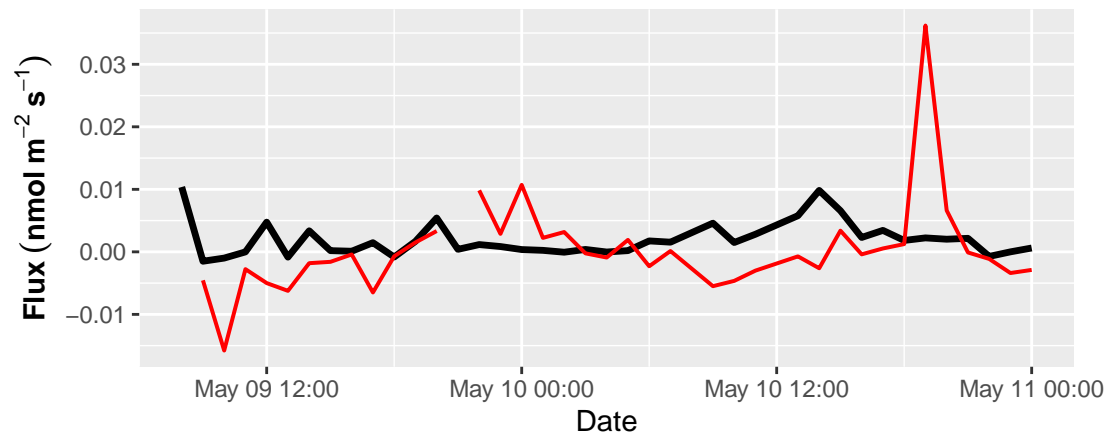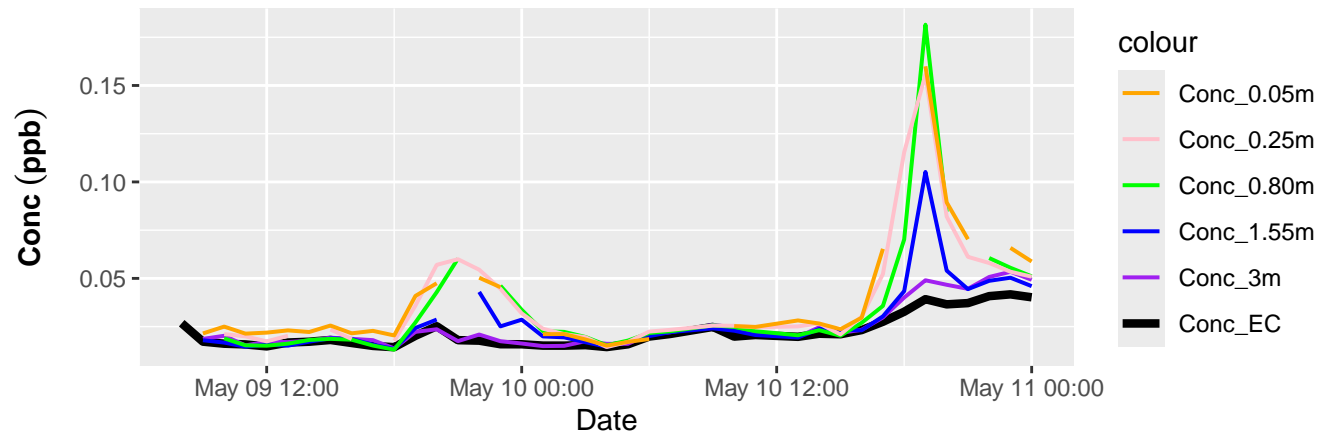

# m118.074

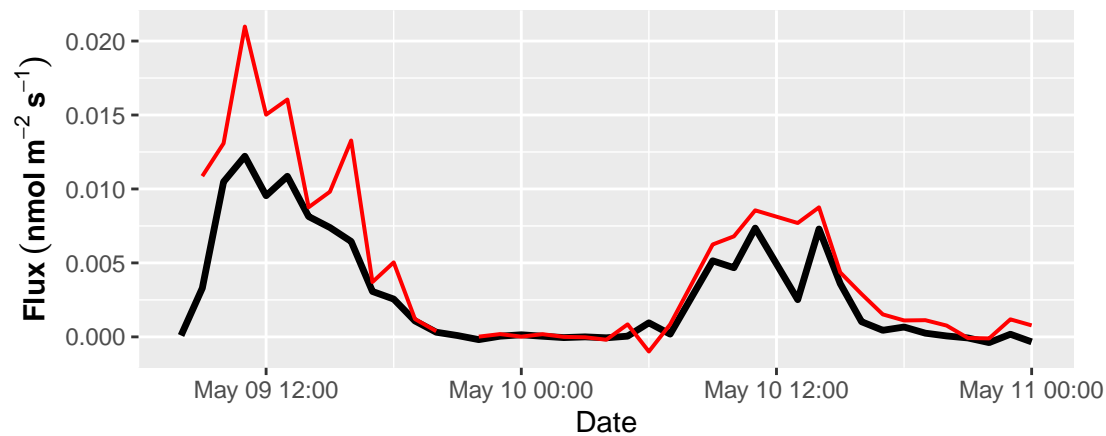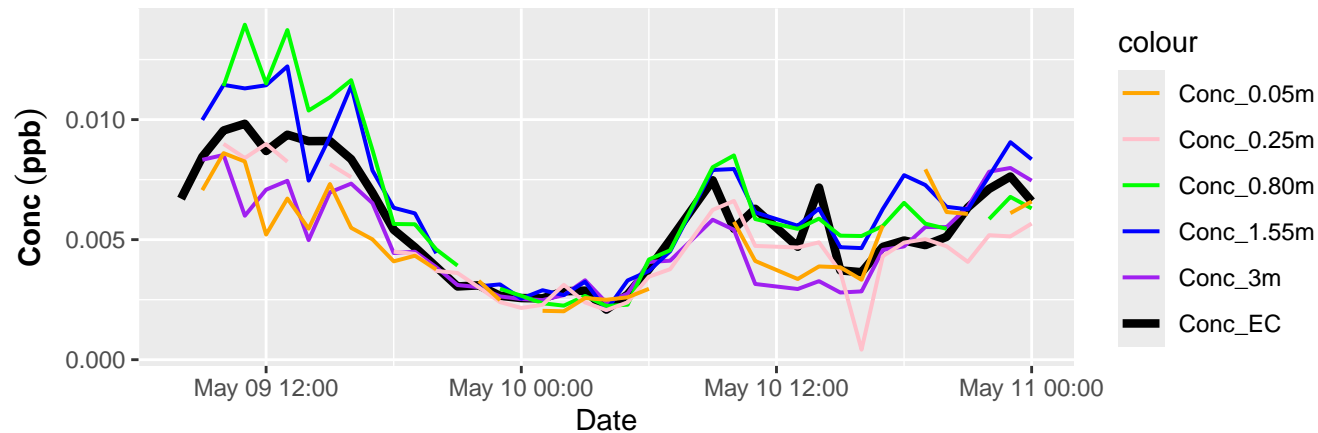

# m121.098

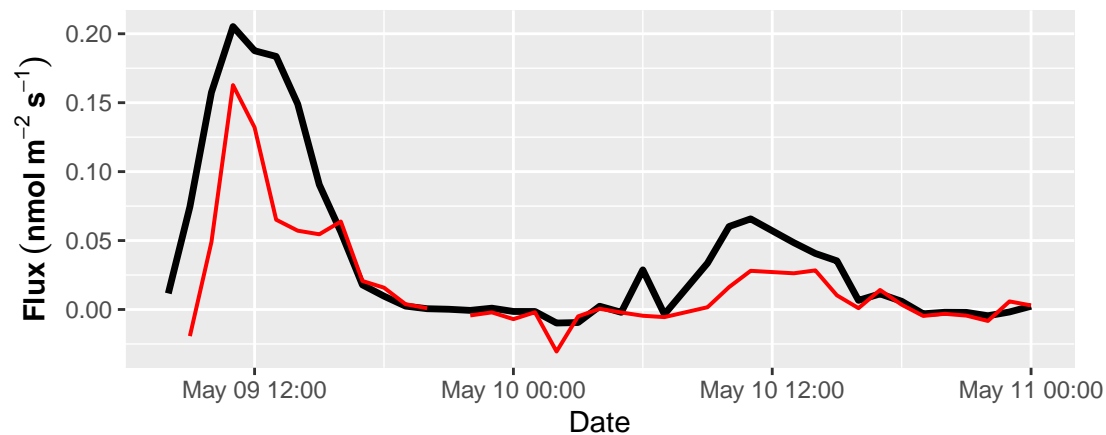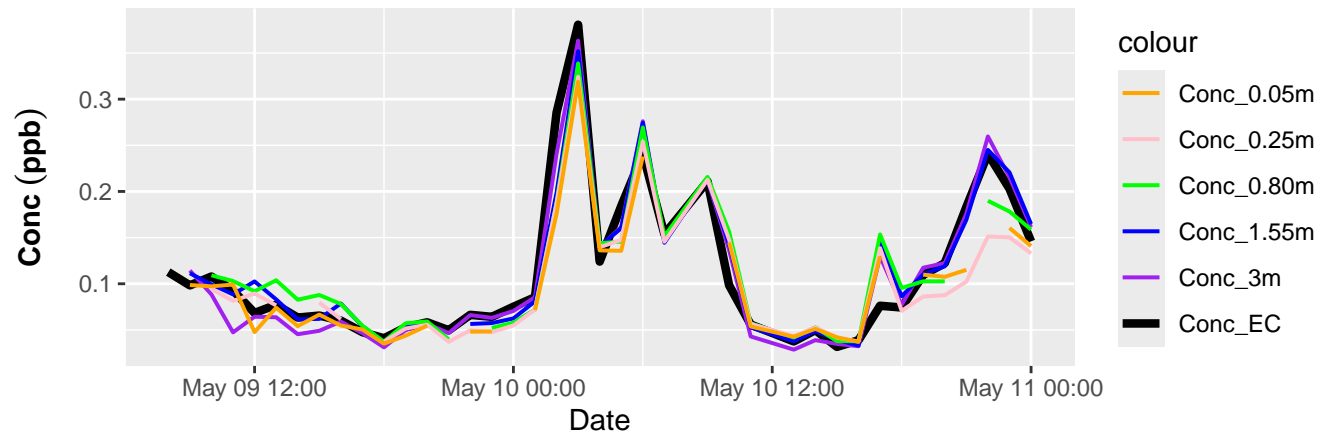

# m137.129

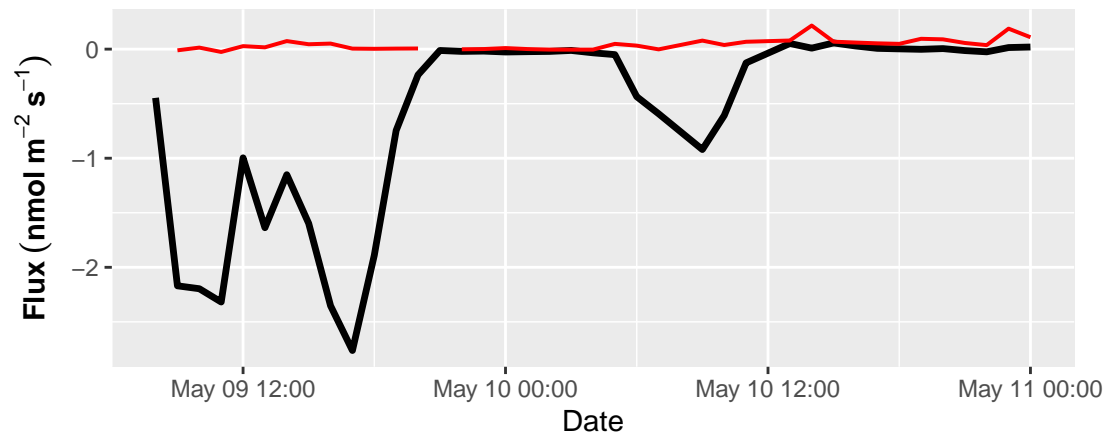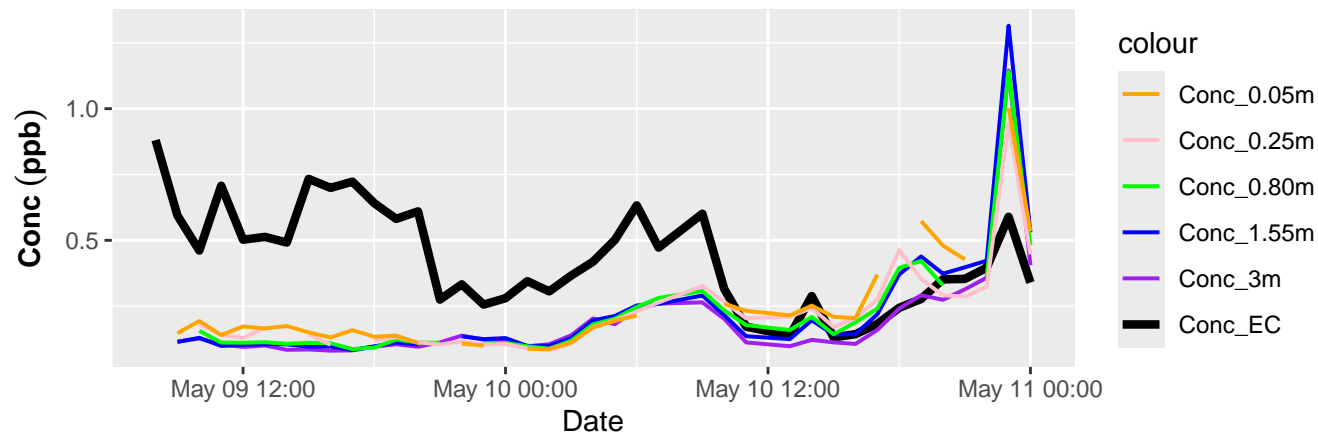

# m167.052

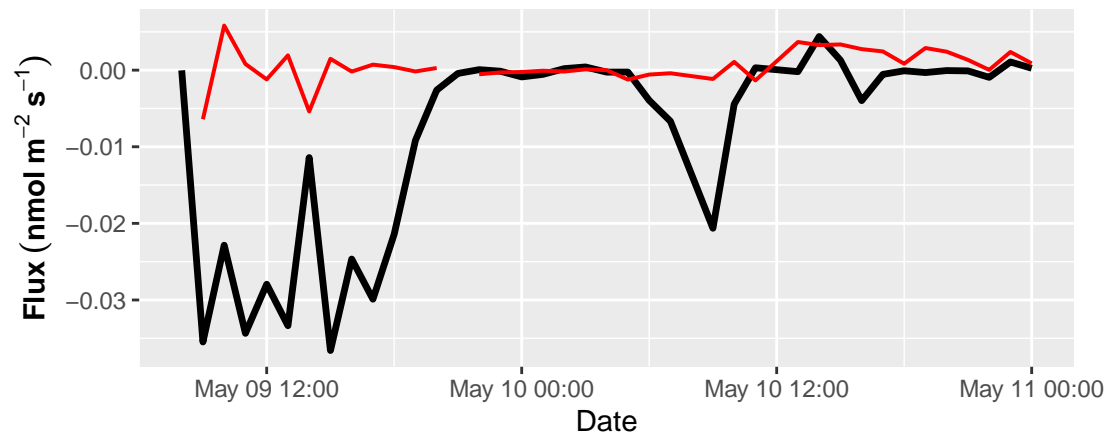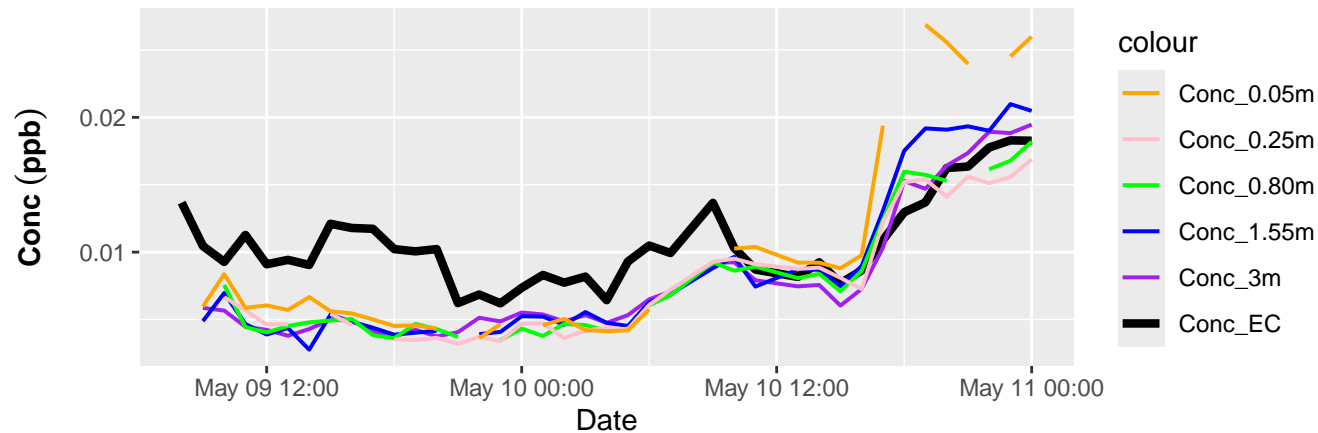

# m205.186

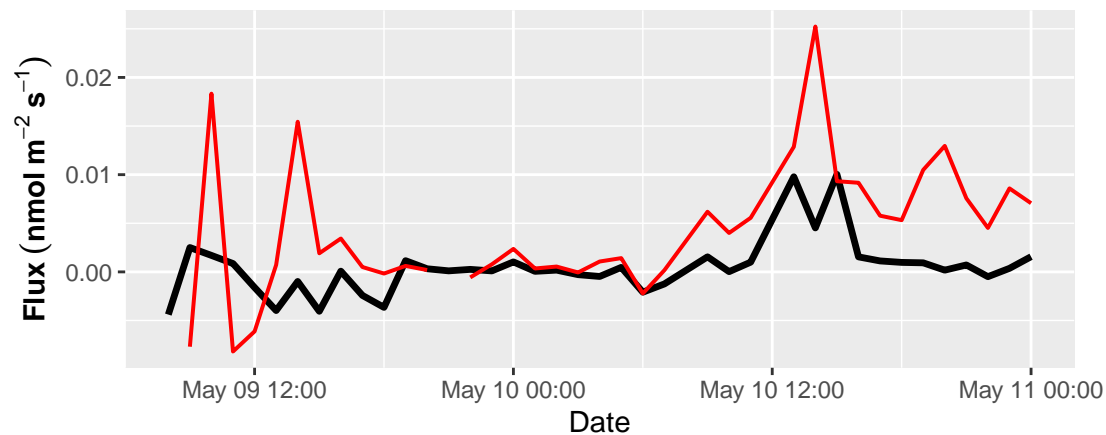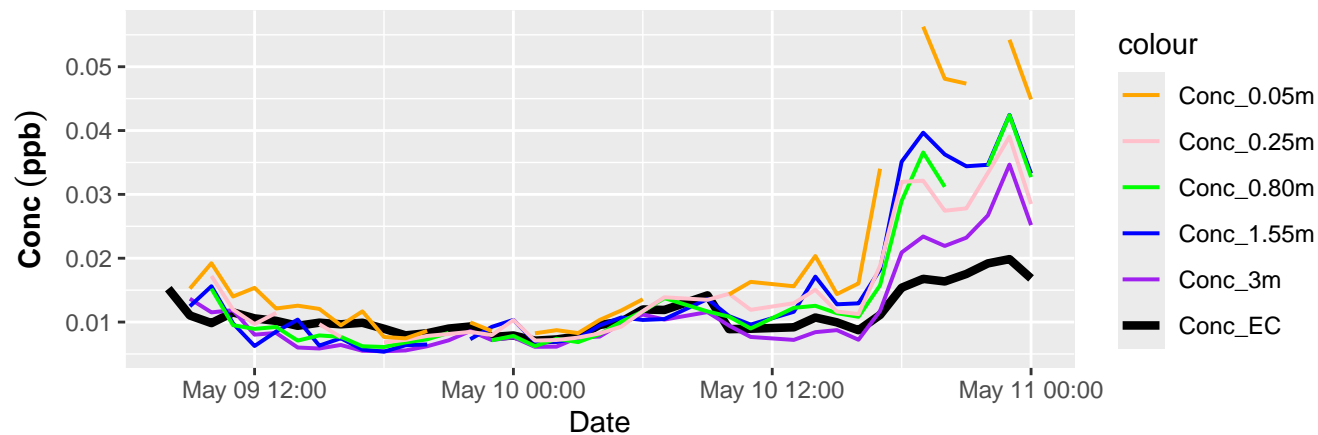

**m223.057**

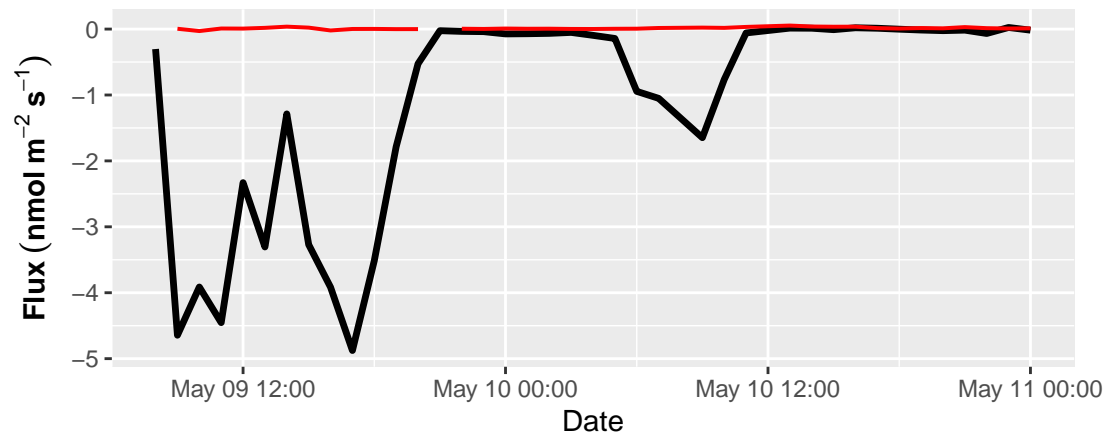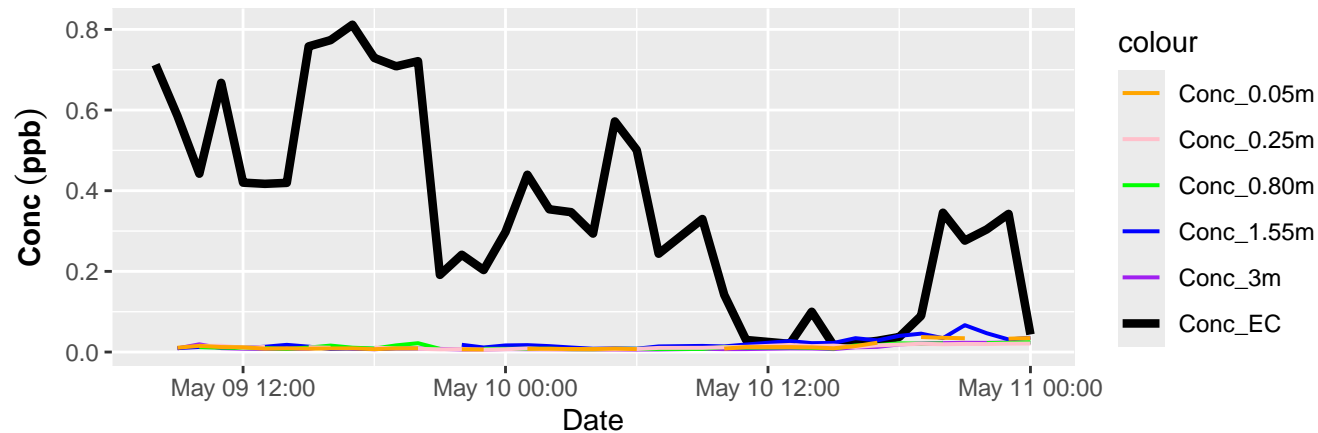

# m247.006

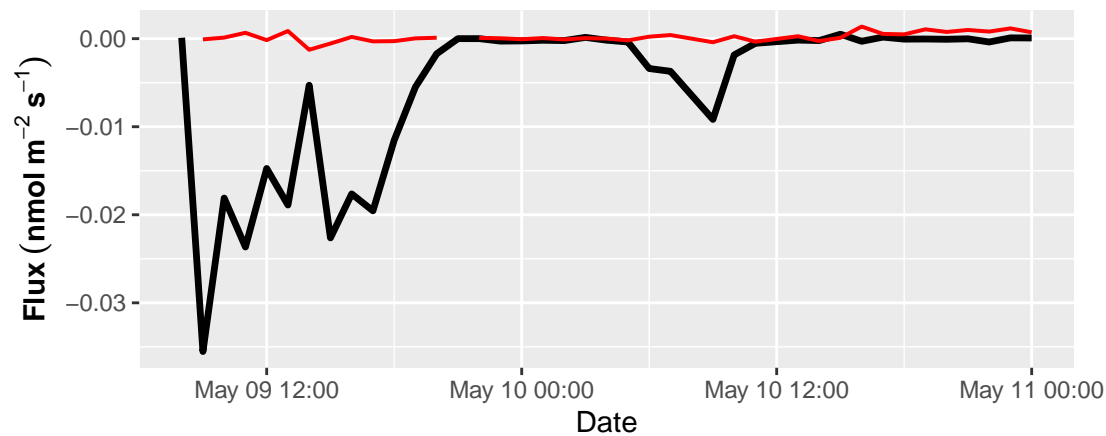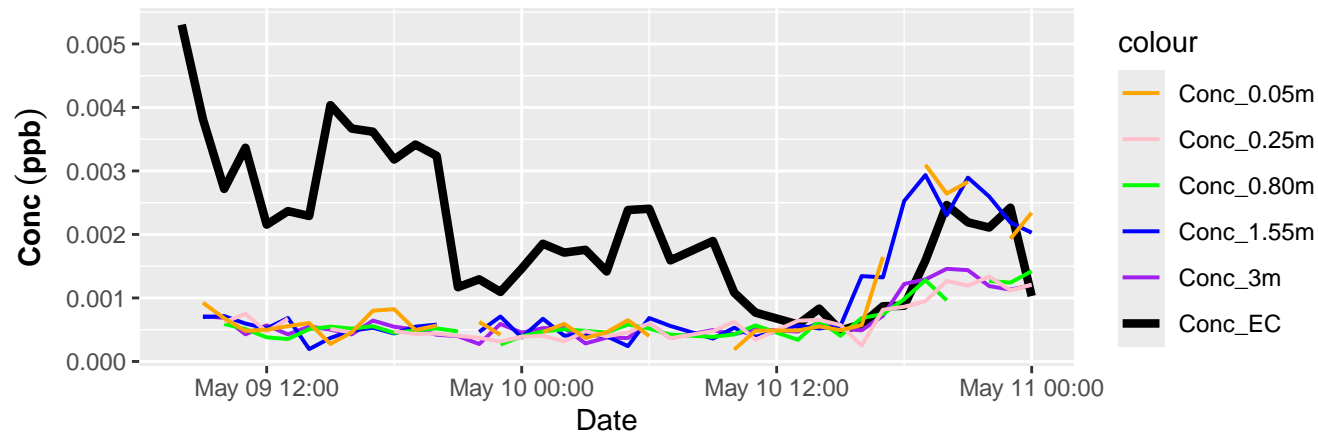



# m297.071

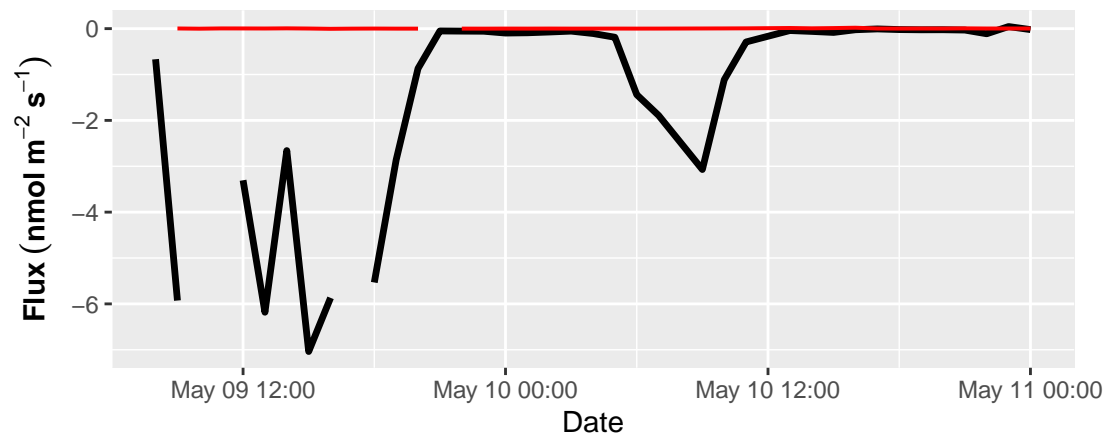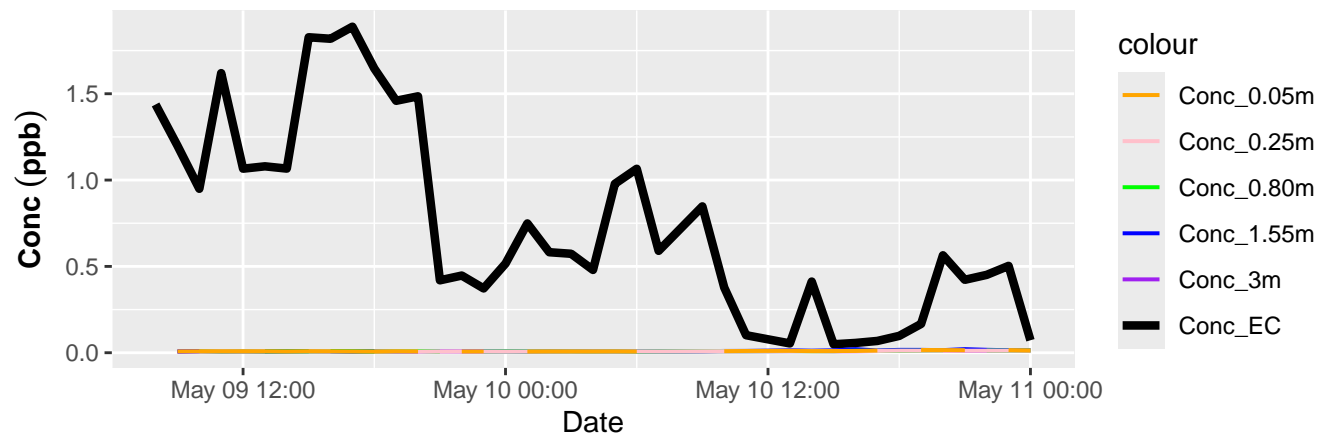

# m355.051

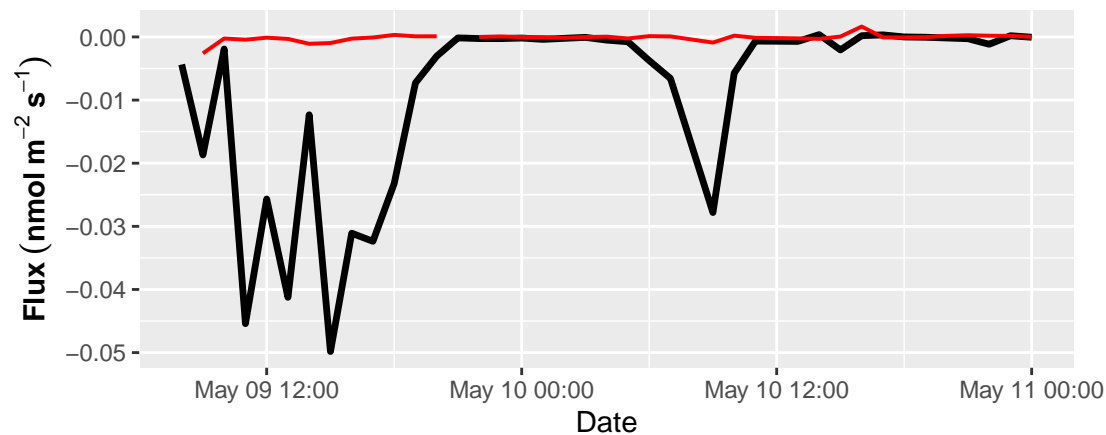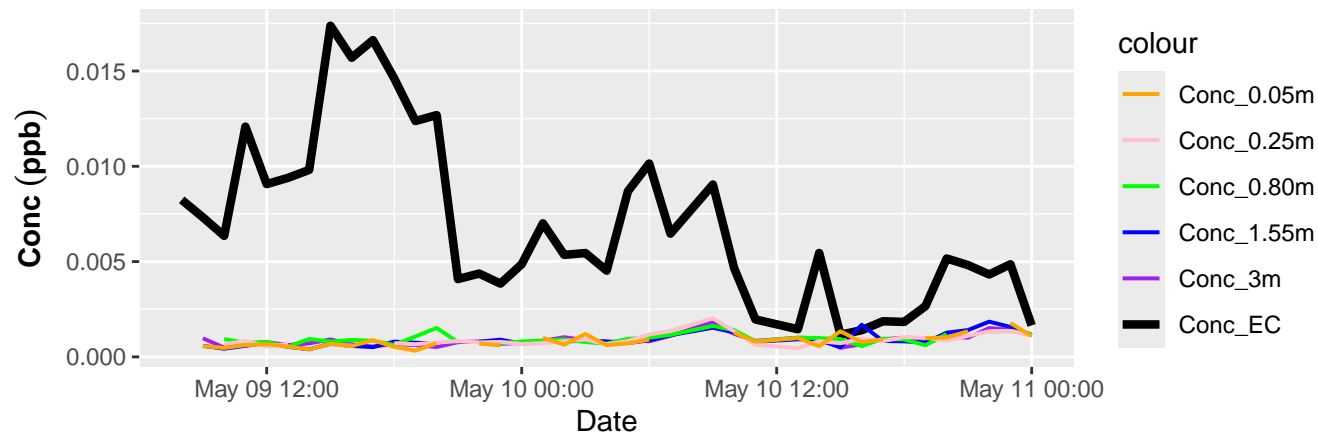

Supplement: Supplementary file 2 [file Fig. S05a - Comparison between EC and profile fluxes - 9 to 10 May.pdf › Supplementary Material/Fig. S05a - Comparison between EC and profile fluxes - 9 to 10 May.pdf]

**m31.018**

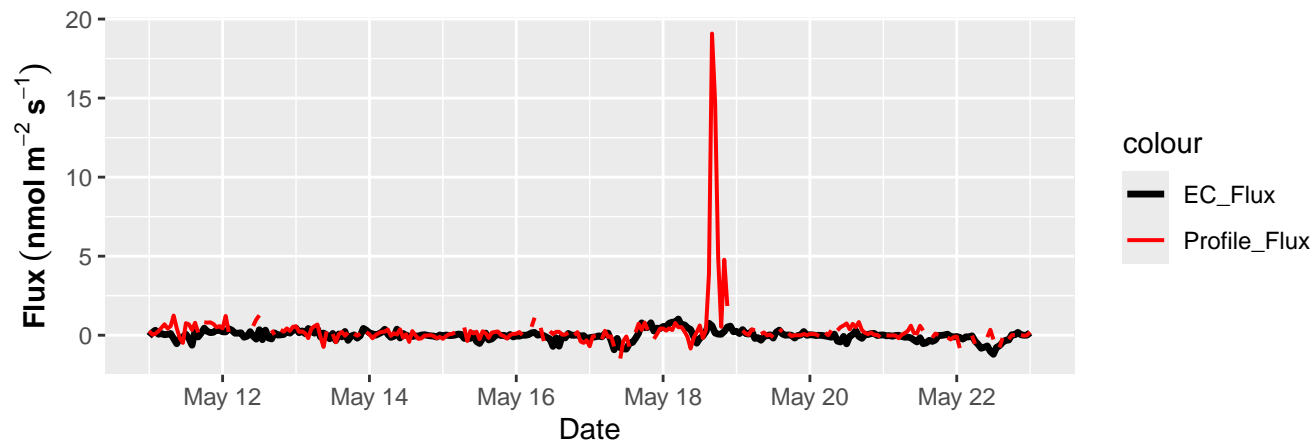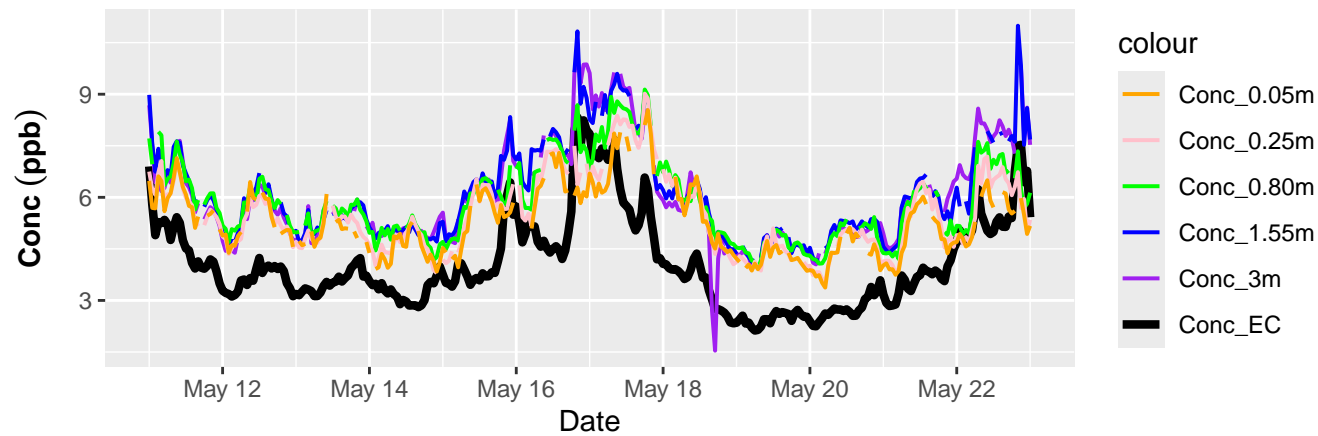

# m33.033

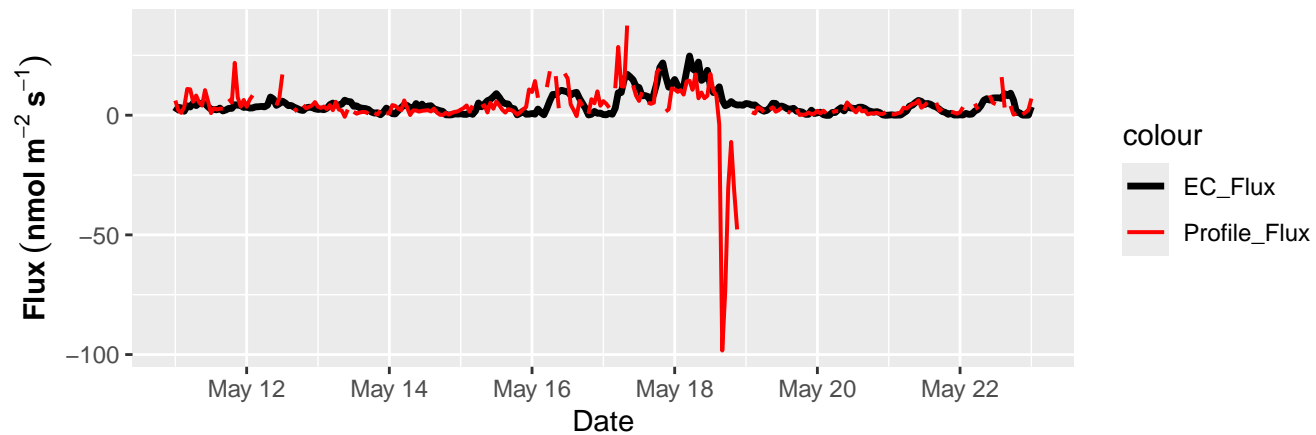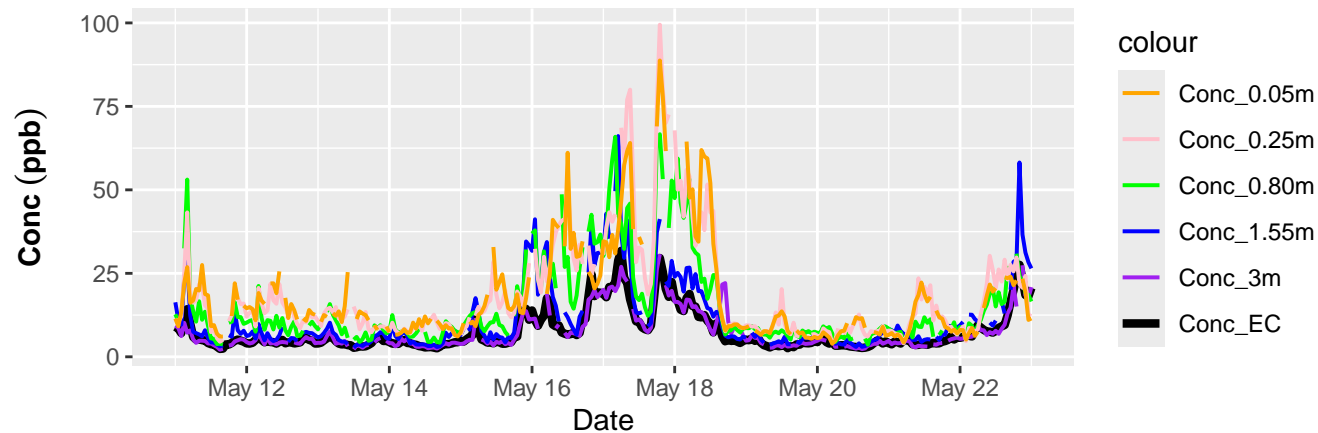

# m41.038

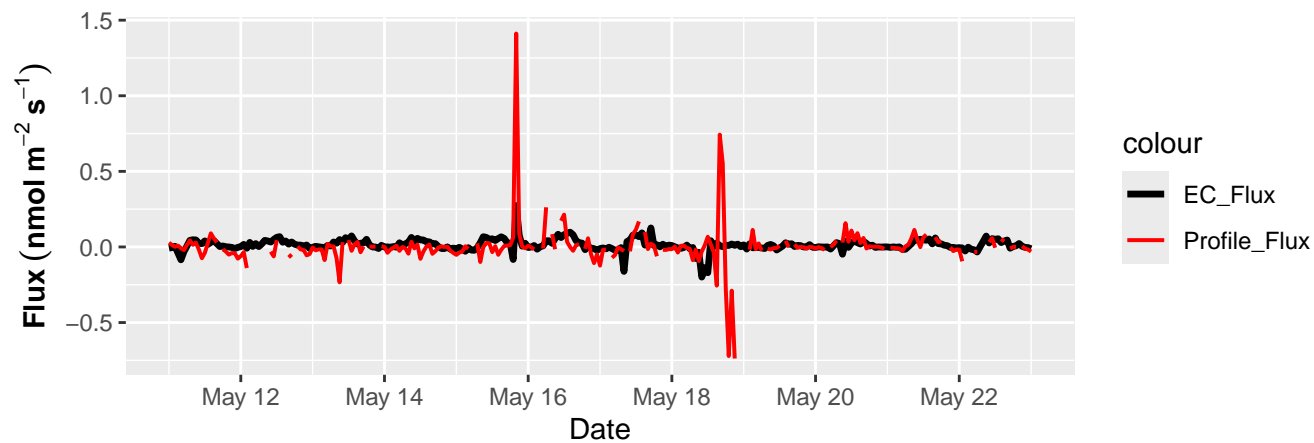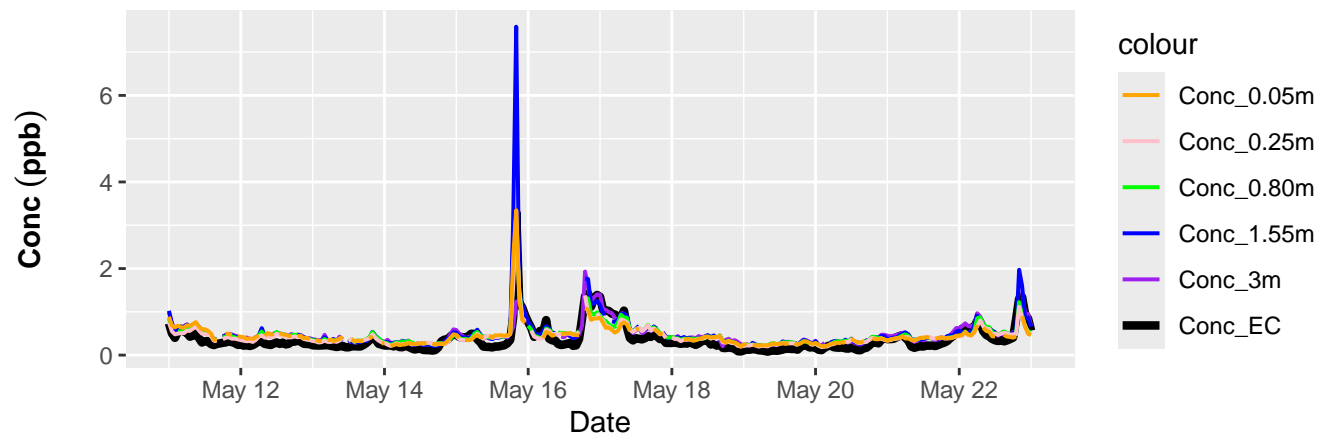

**m43.018**

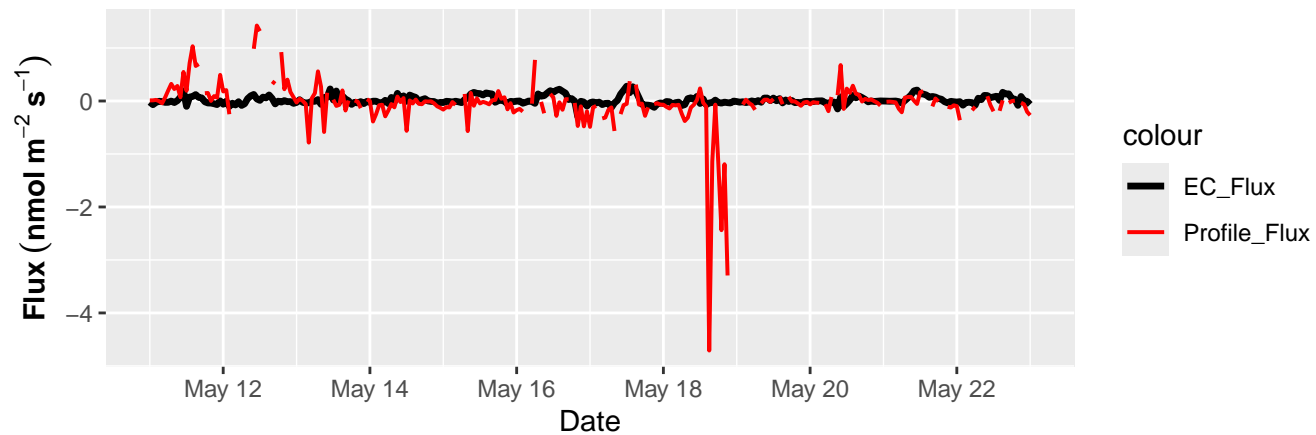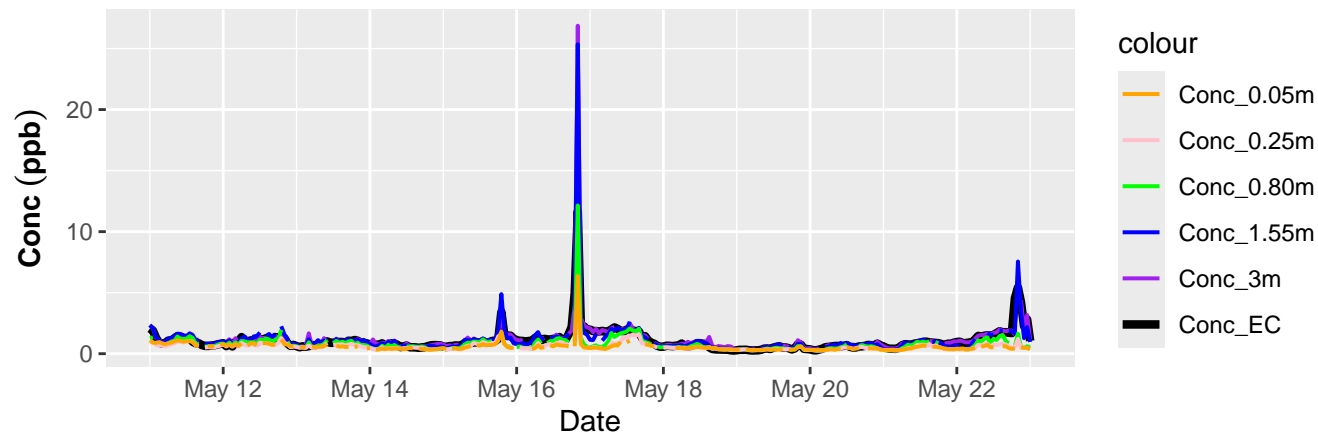

m45.033

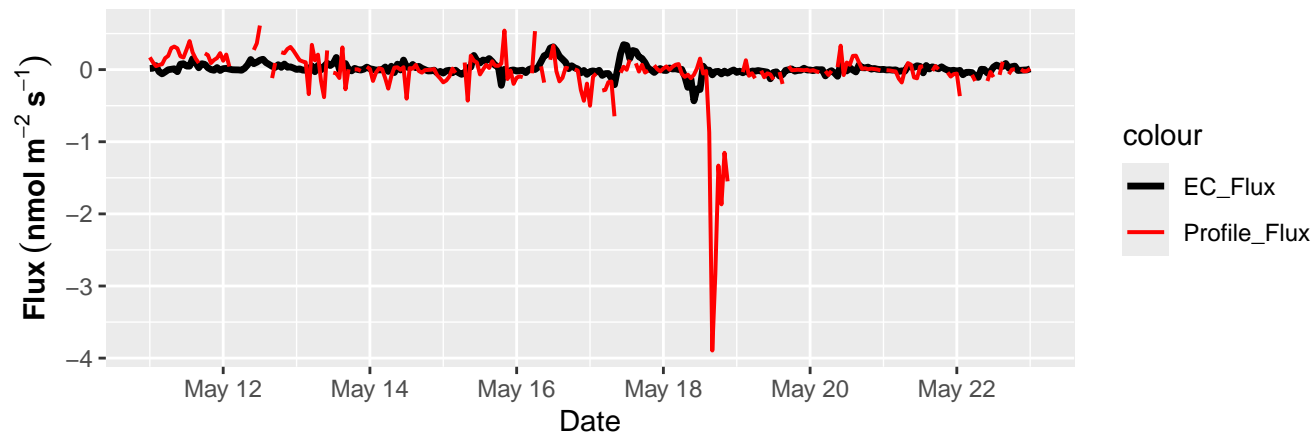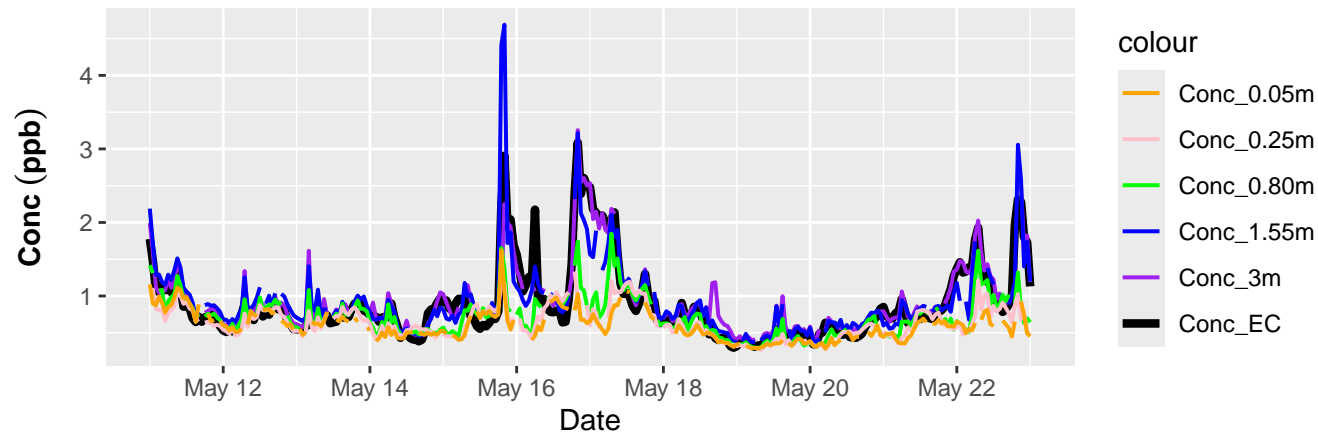

# m47.013

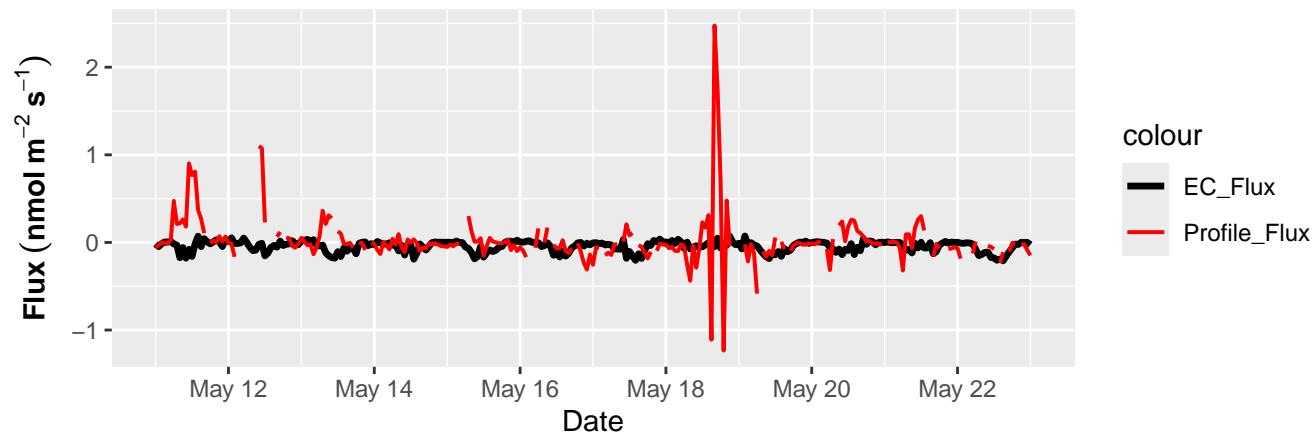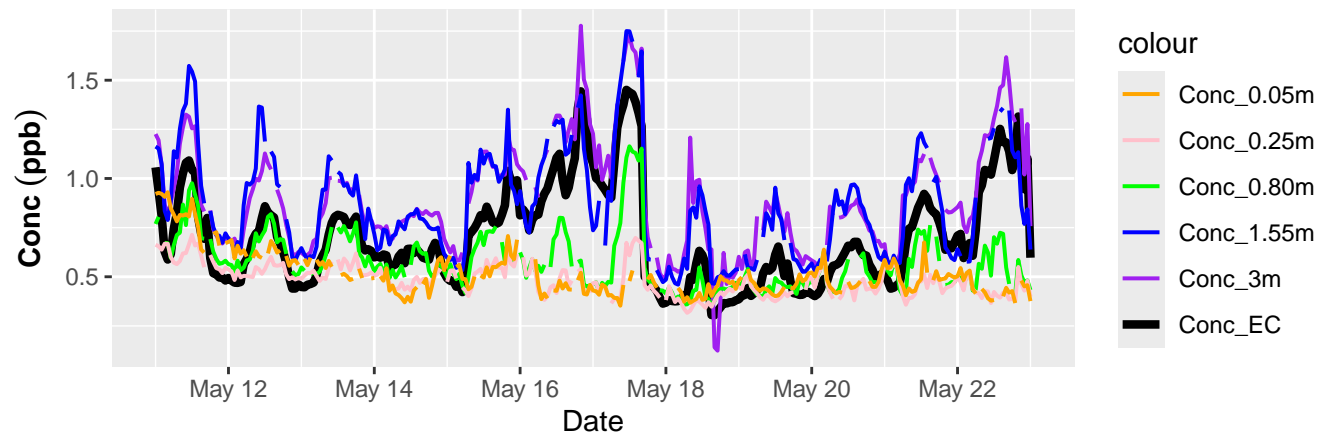

# m49.014

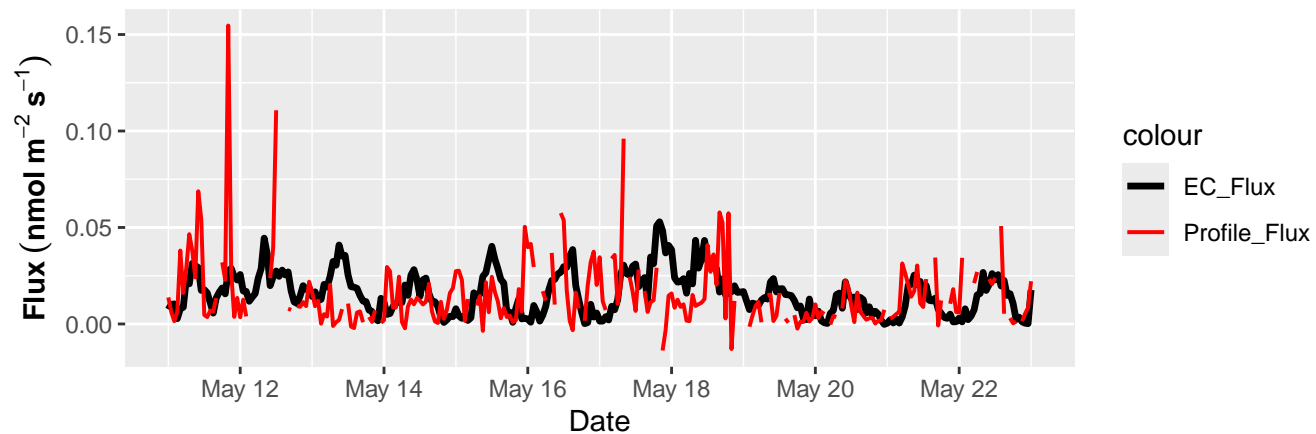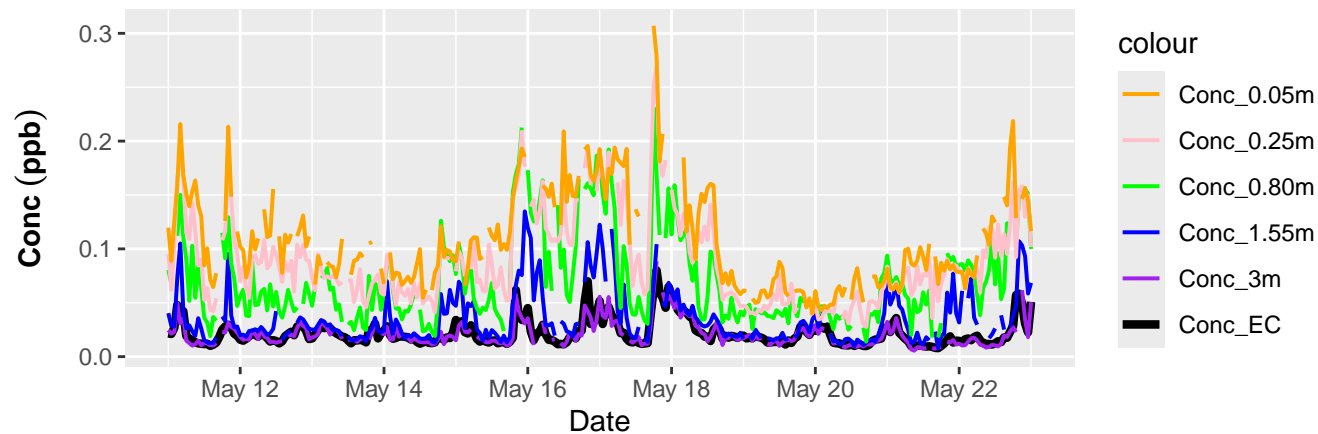

# m51.022

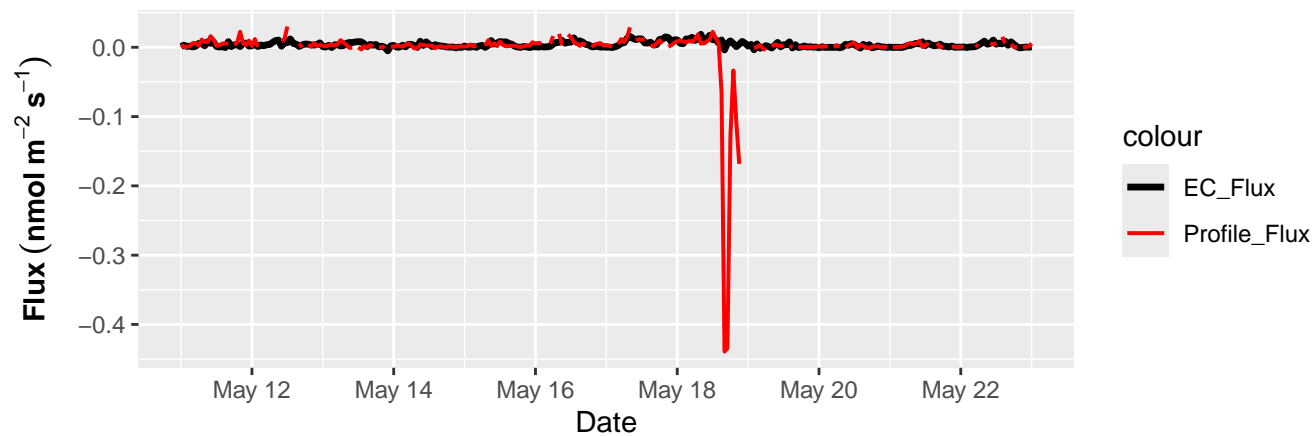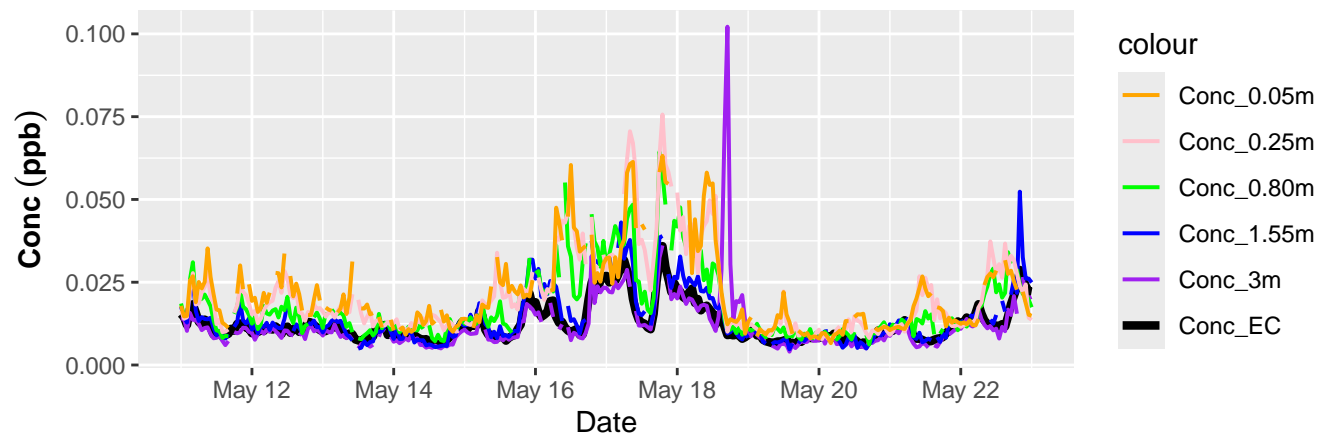



m57.069

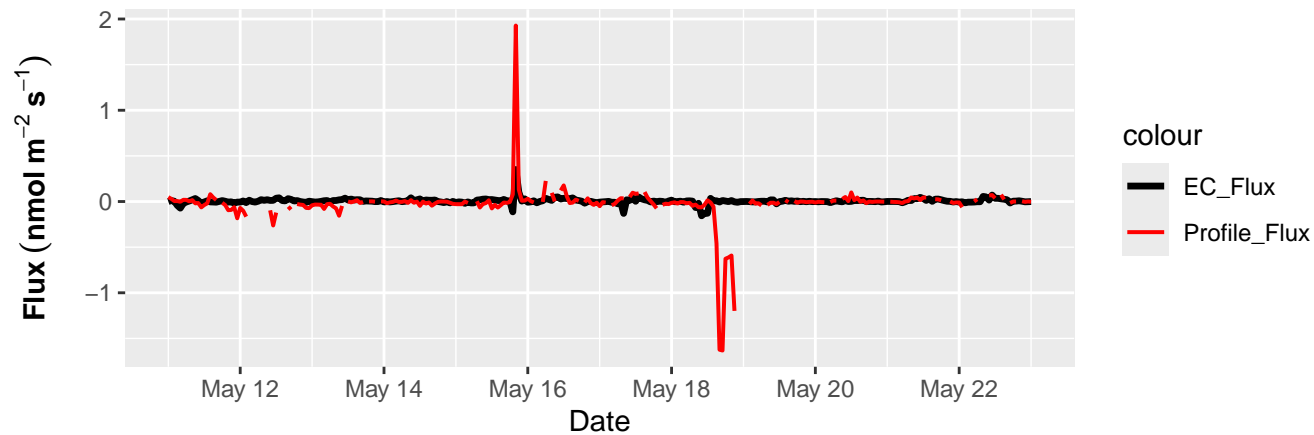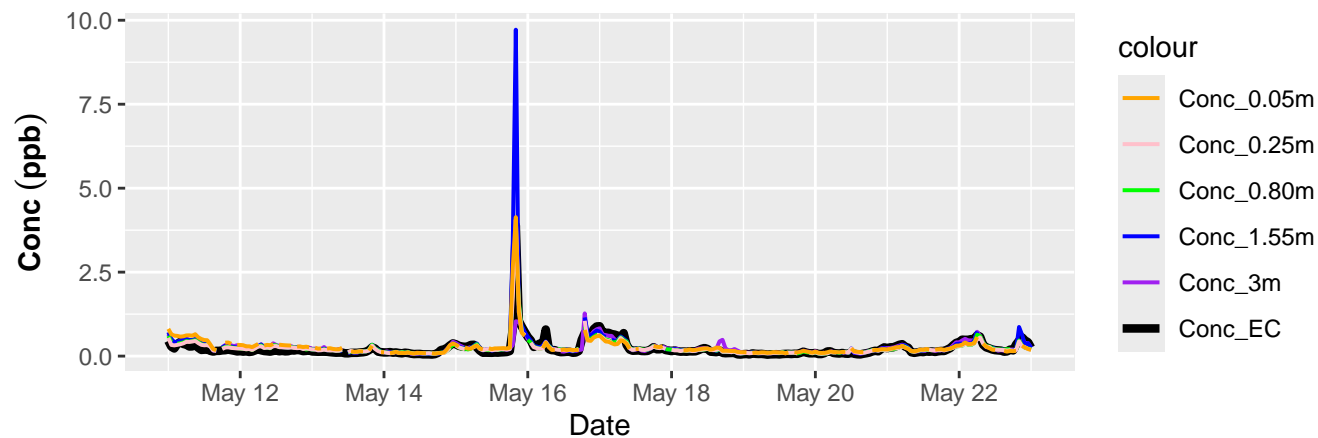

**m59.049**

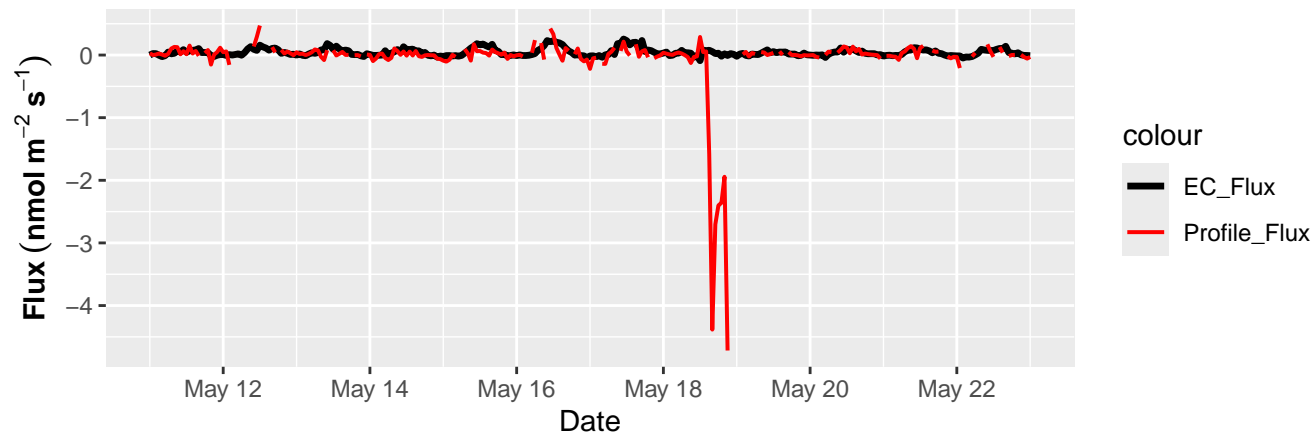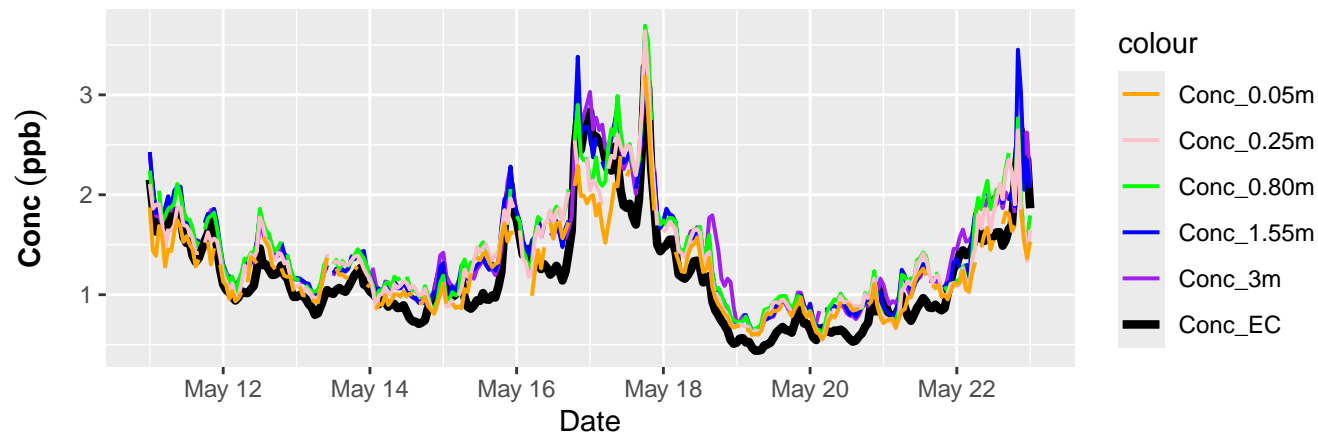

**m60.048**

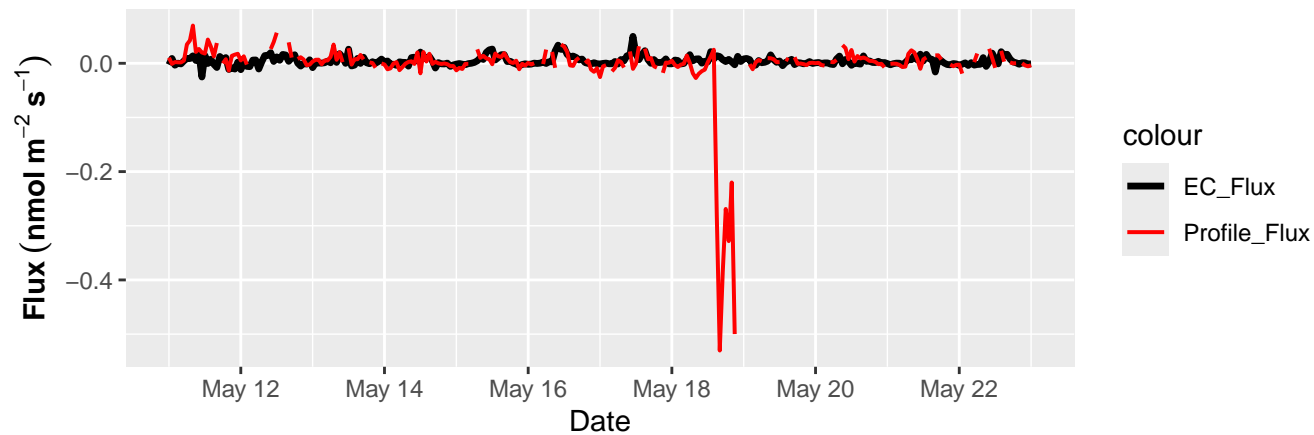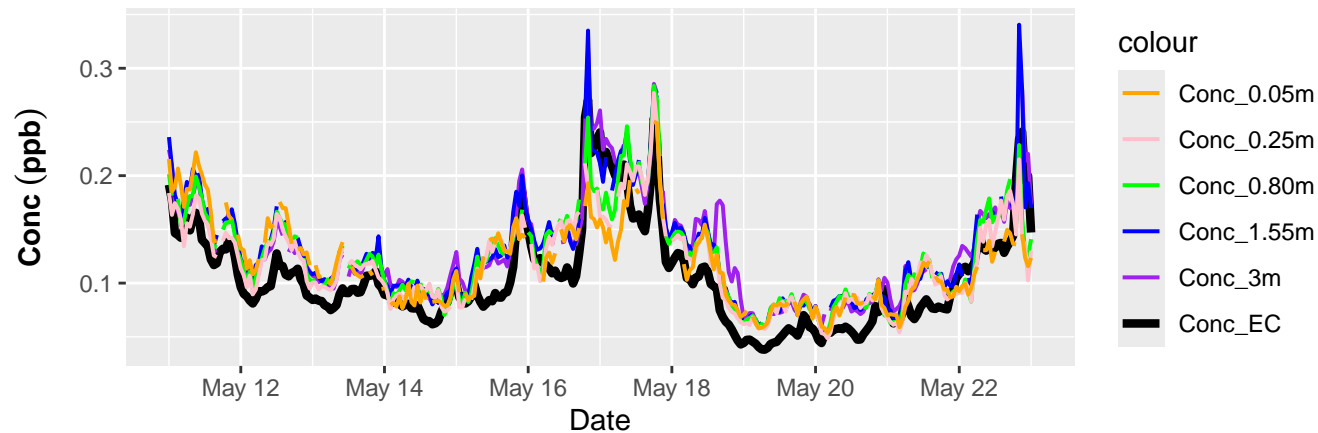

**m61.029**

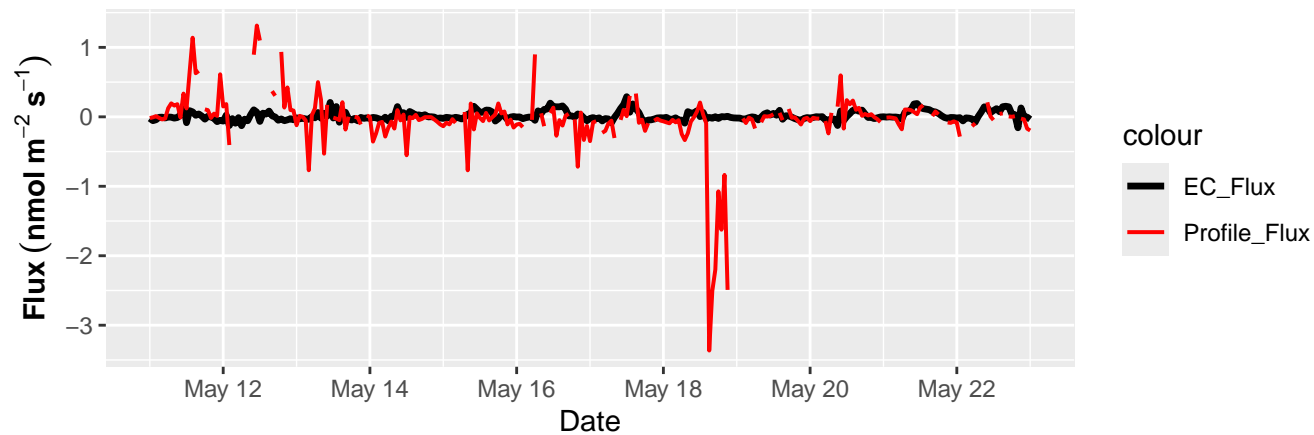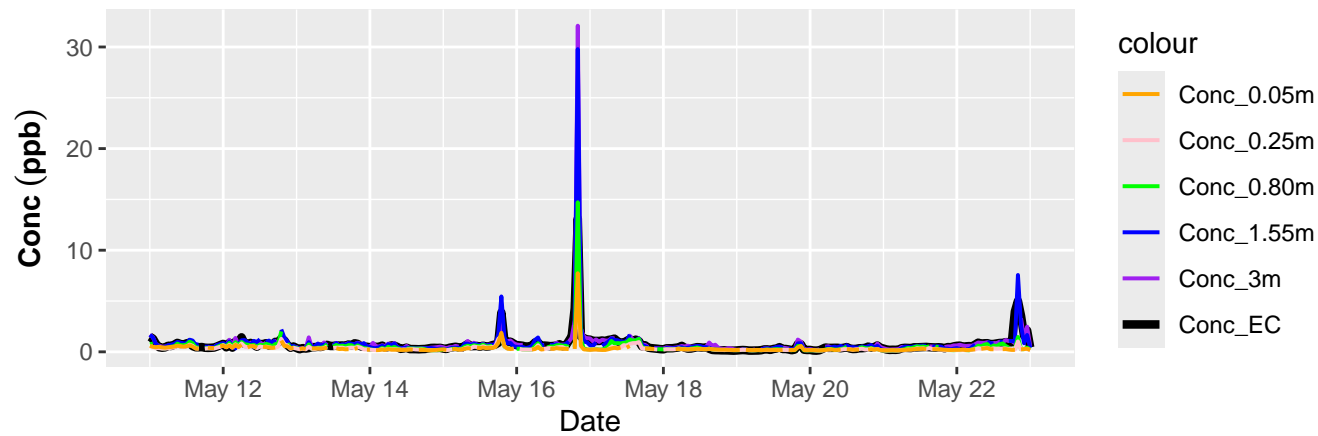

m62.029

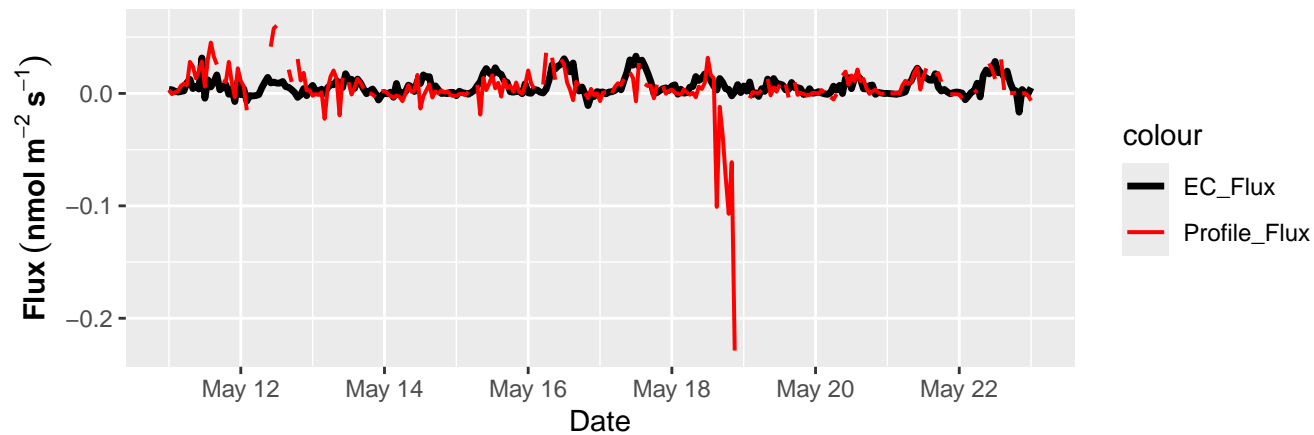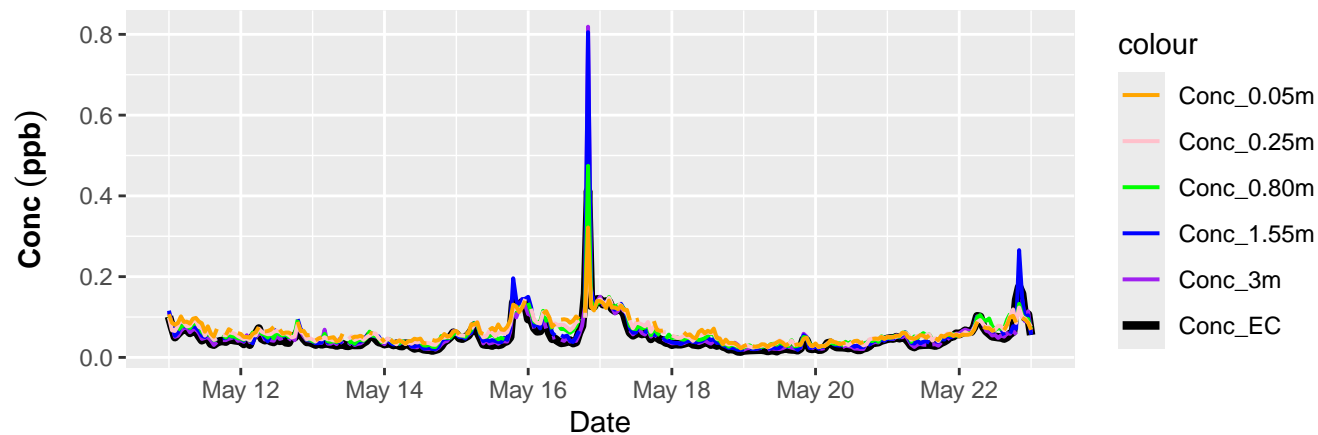

**m63.006**

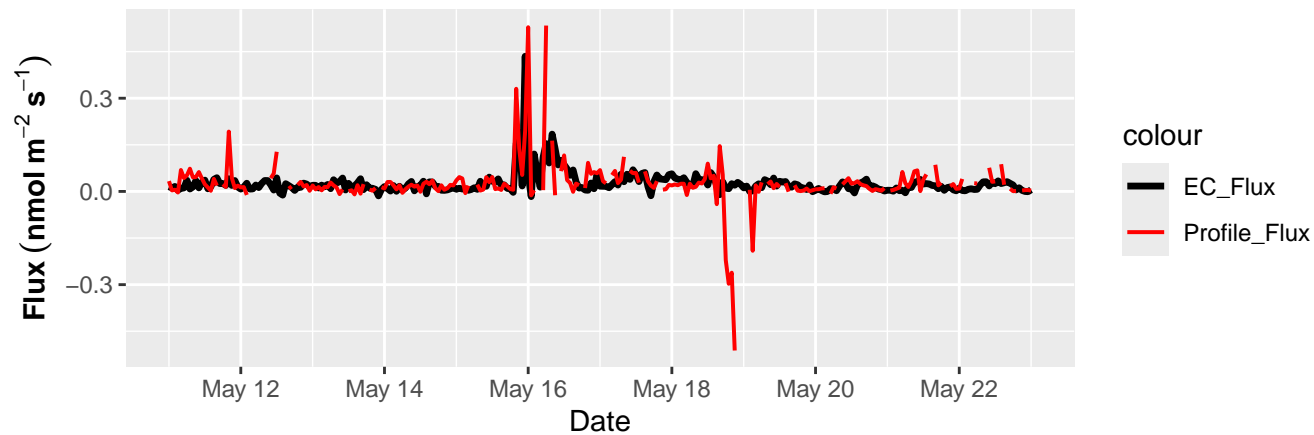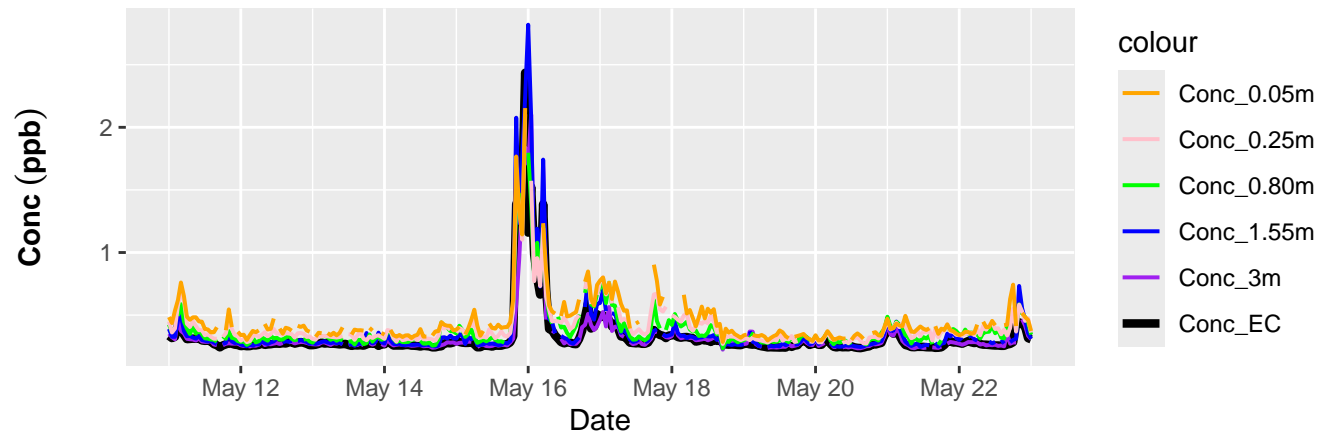

m67.053

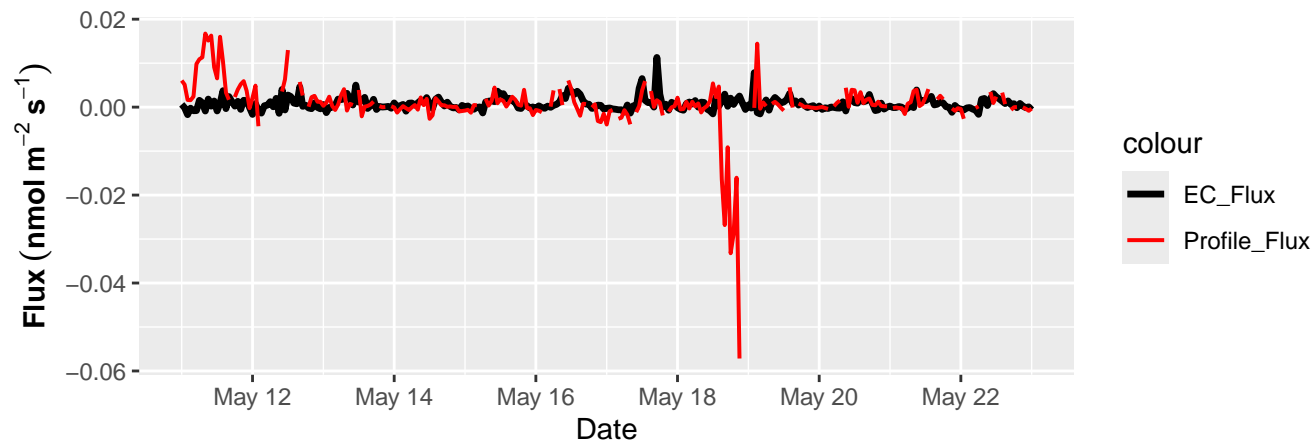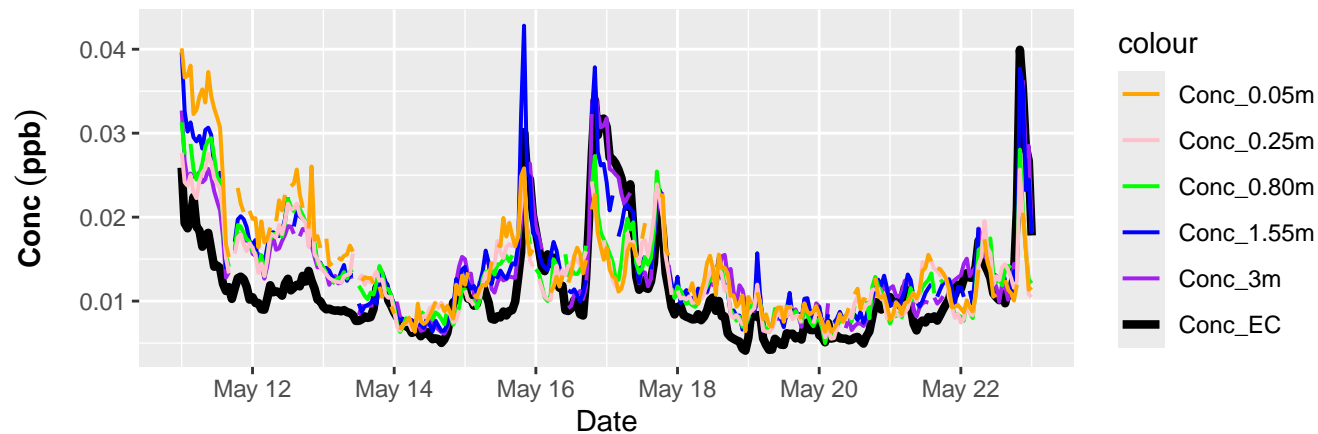

# m69.070

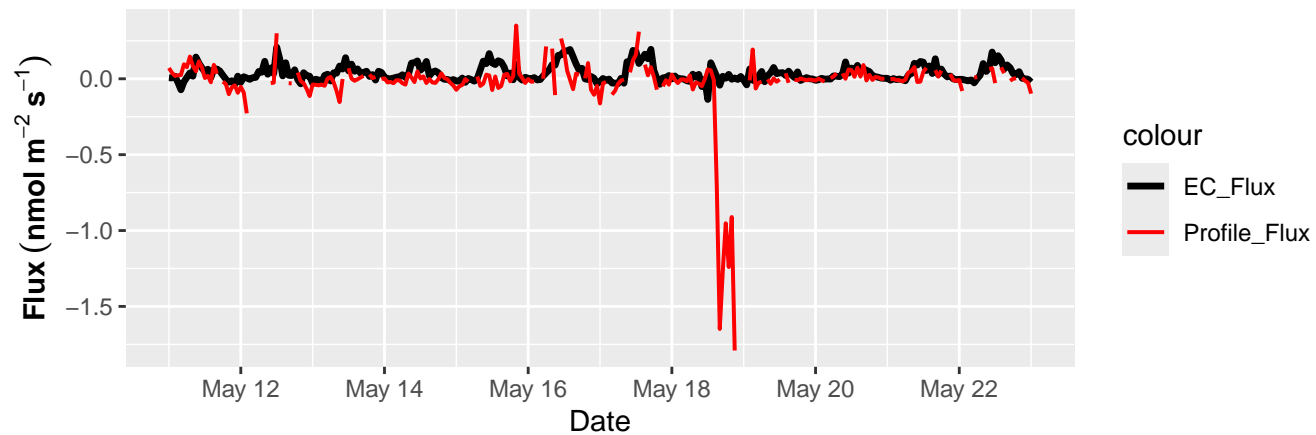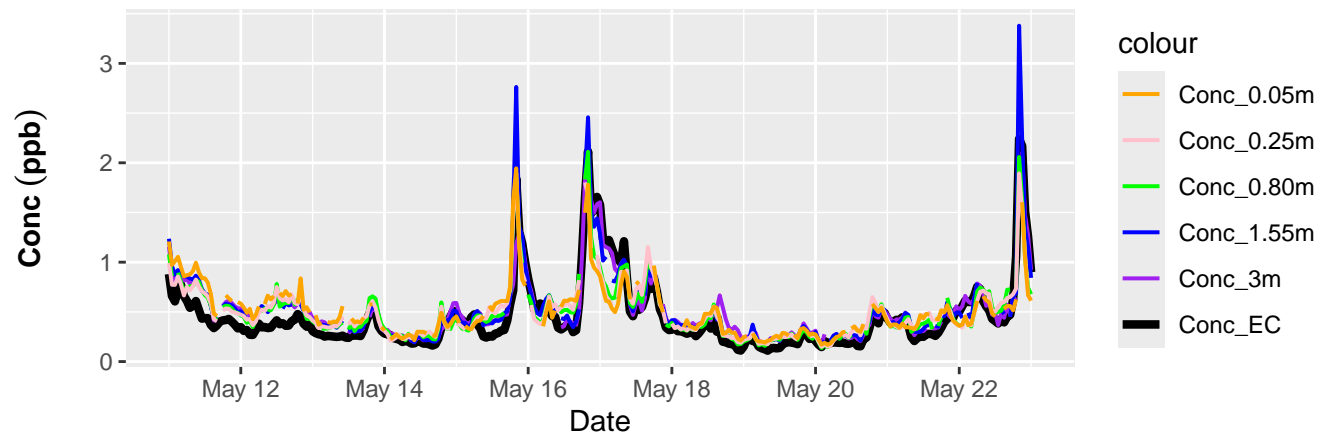



m73.064

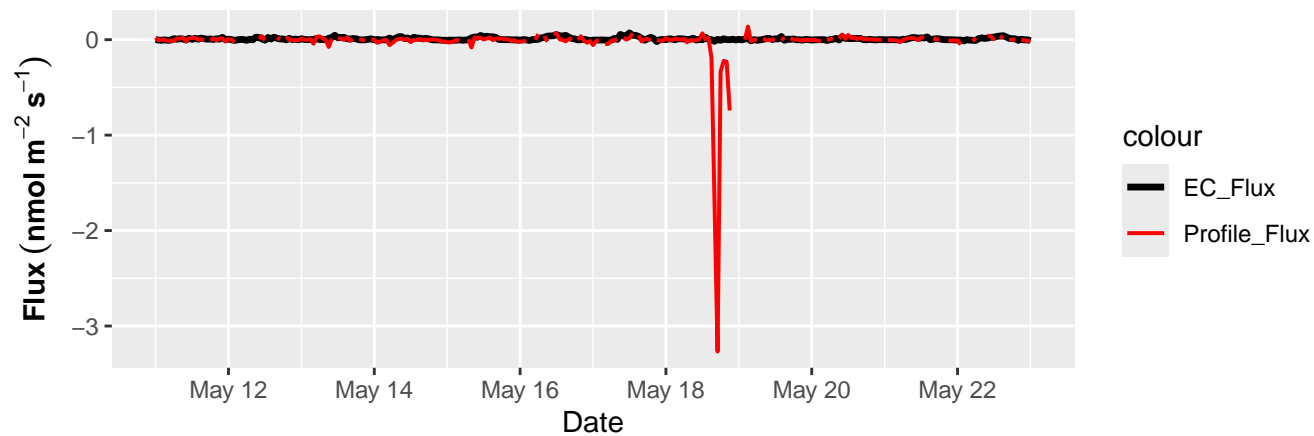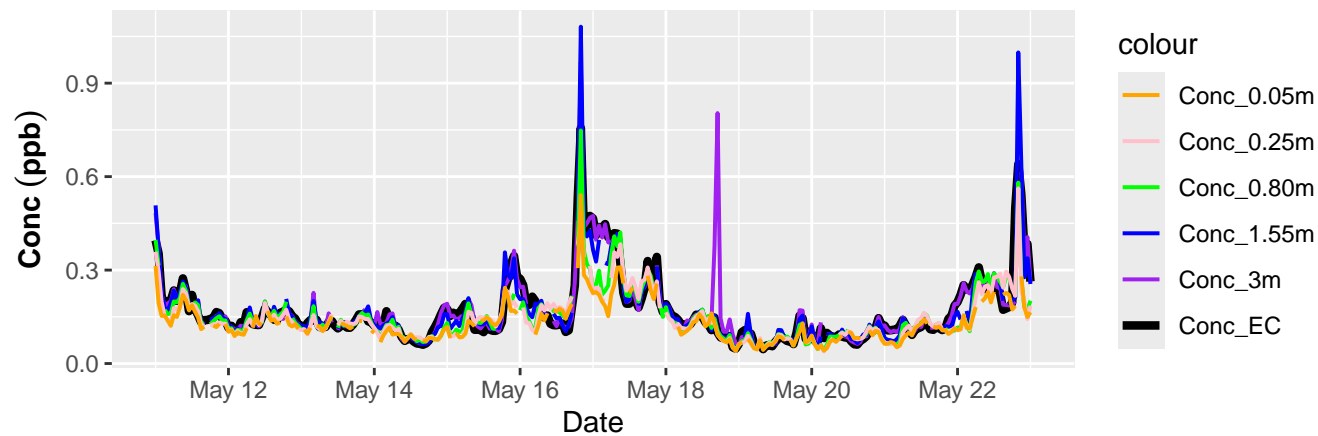

**m75.025**

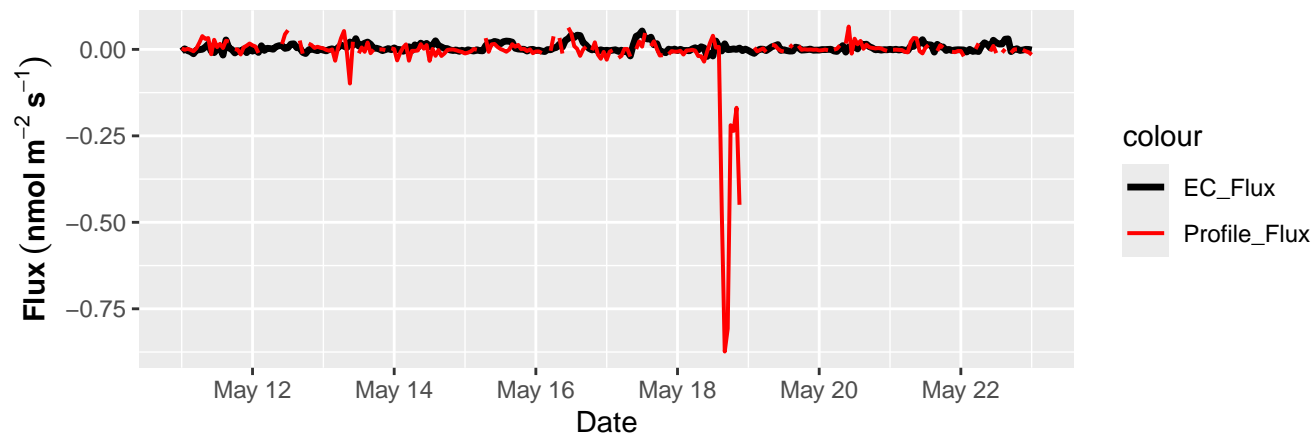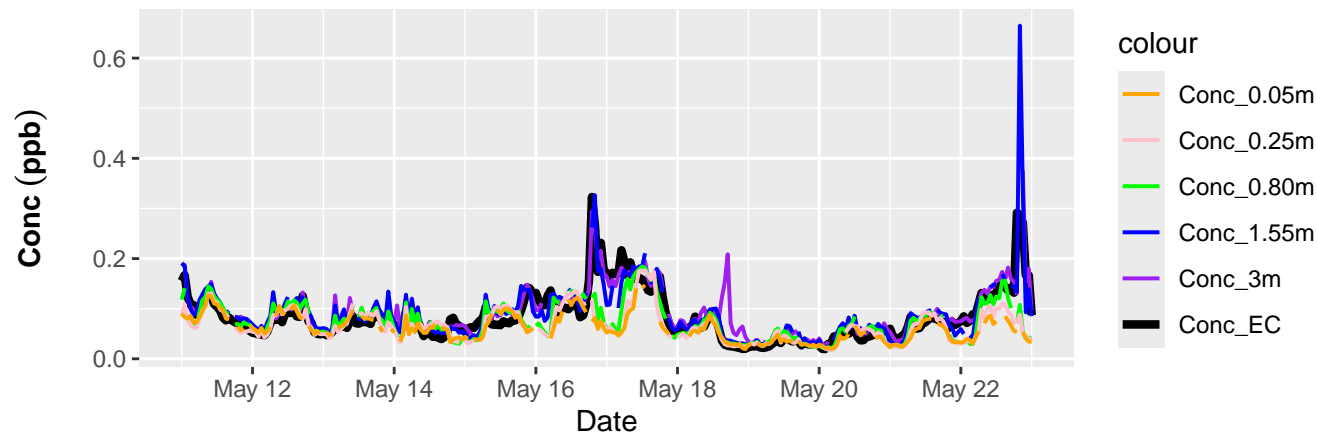

m77.005

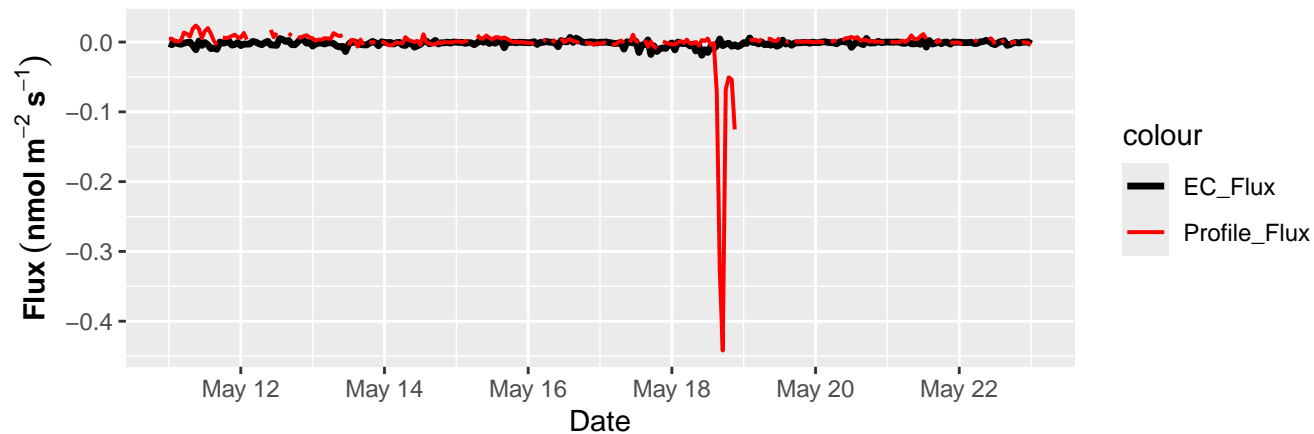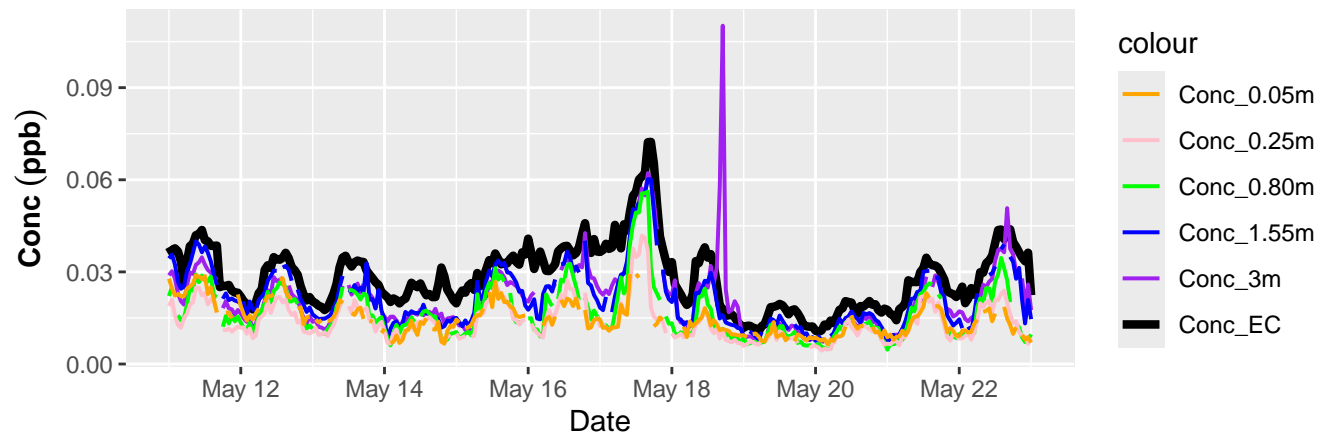

**m82.074**

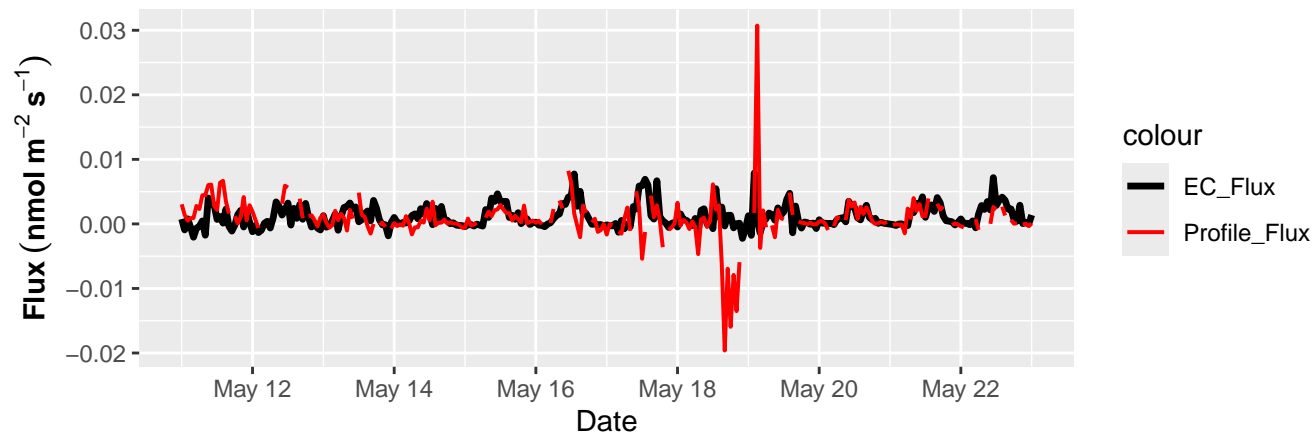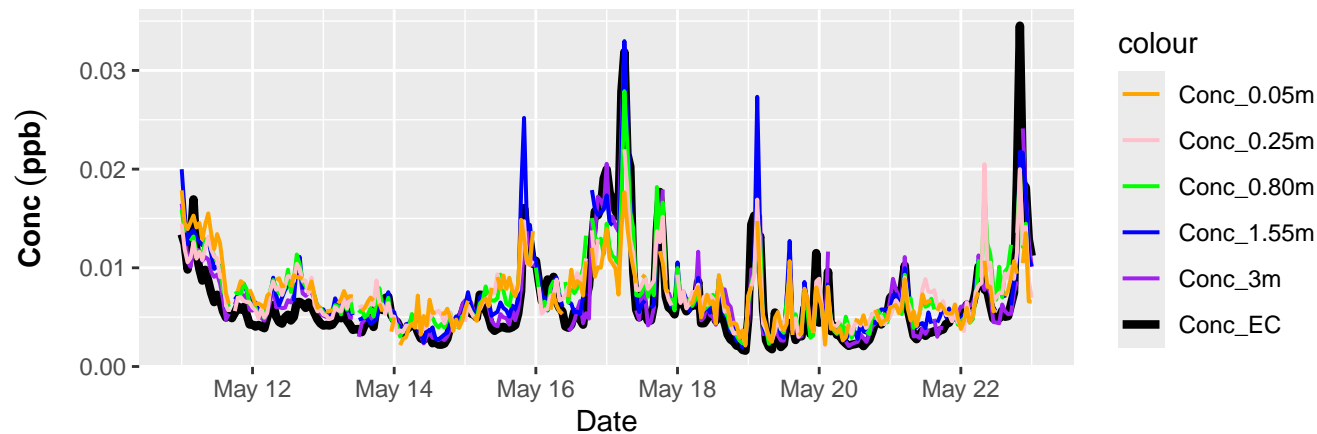

m83.049

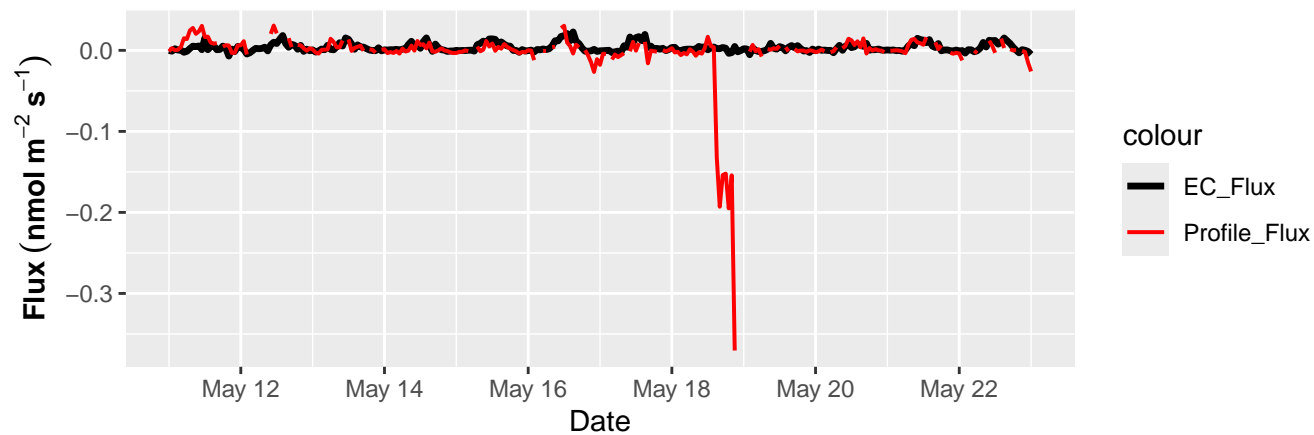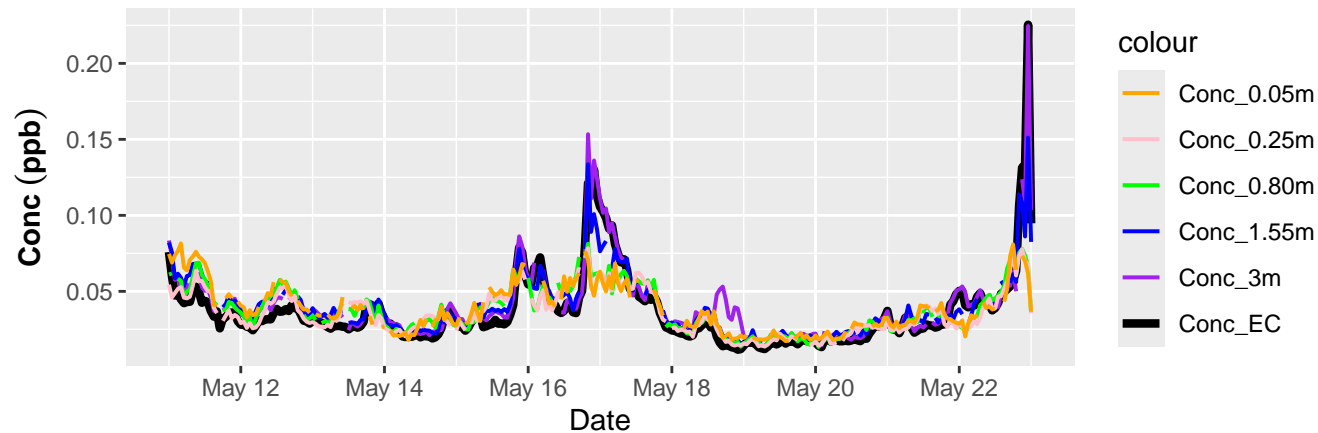

# m83.084

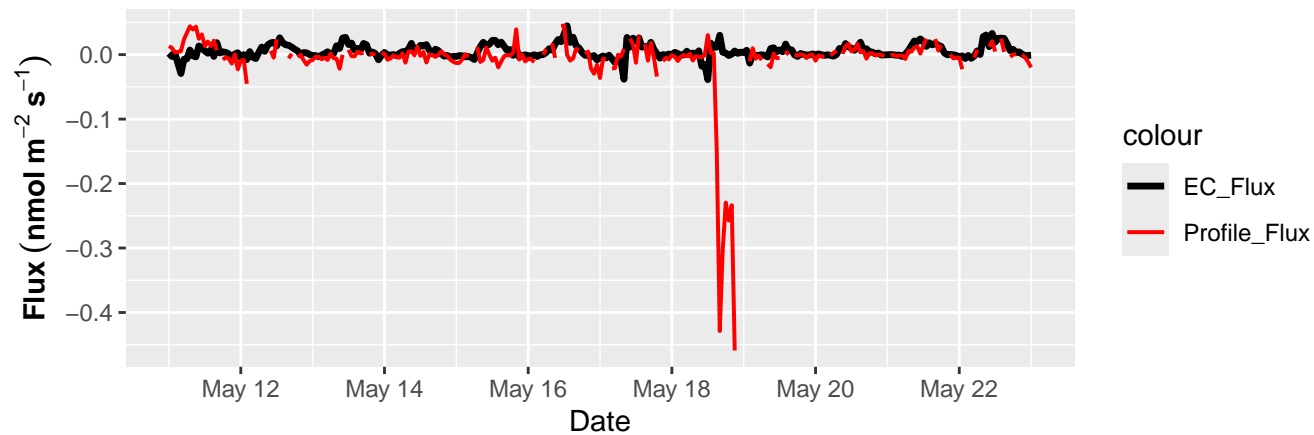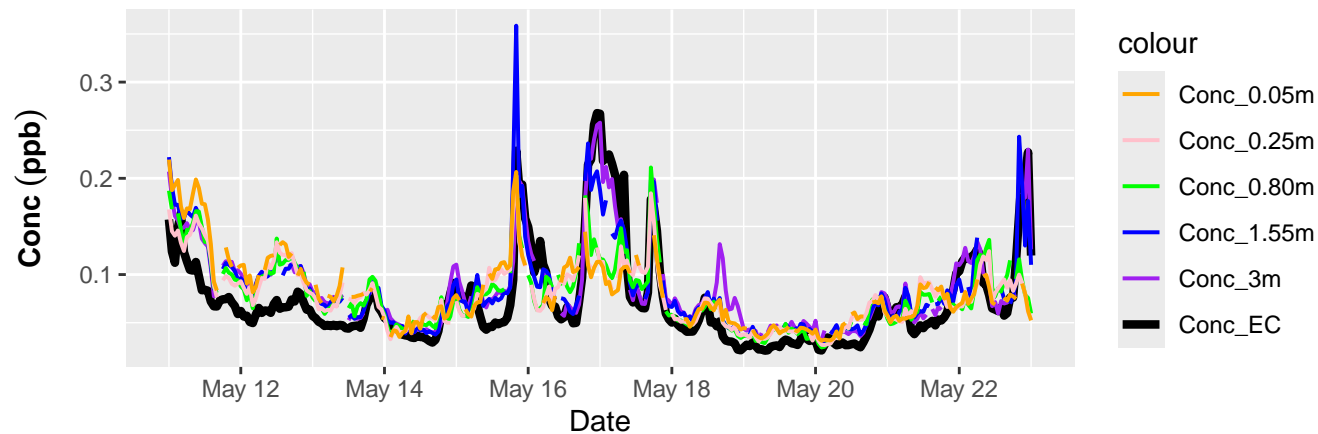

# m87.042

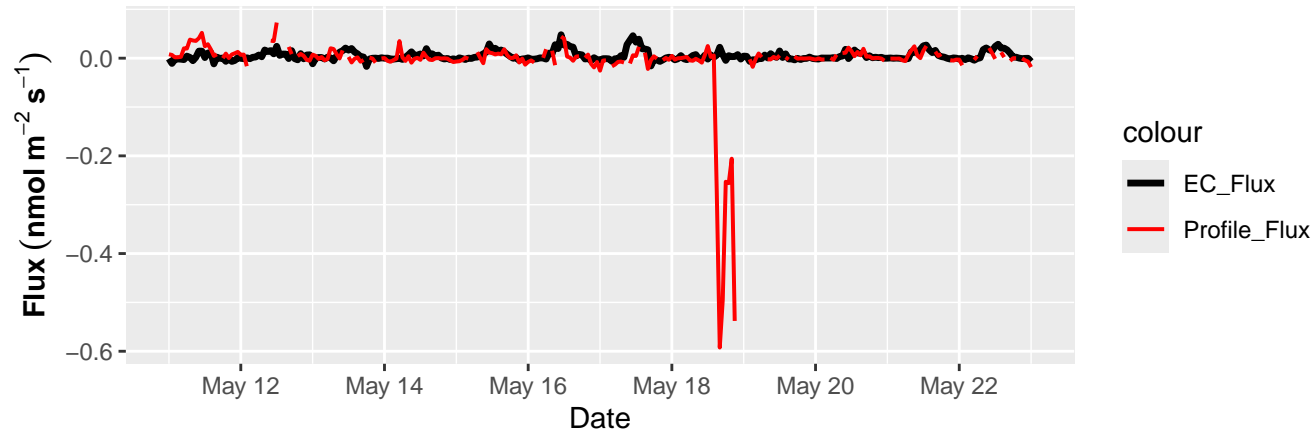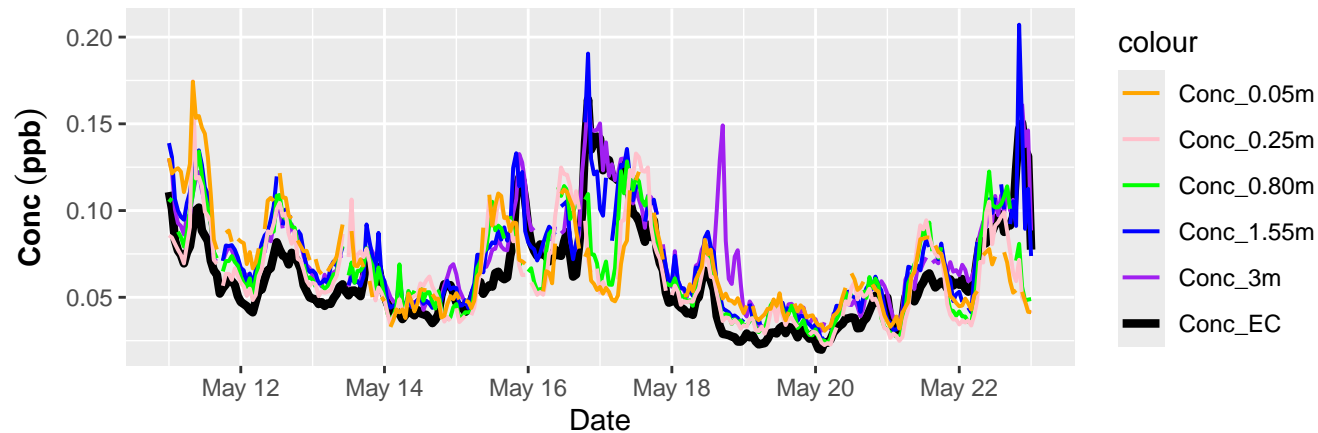

m87.078

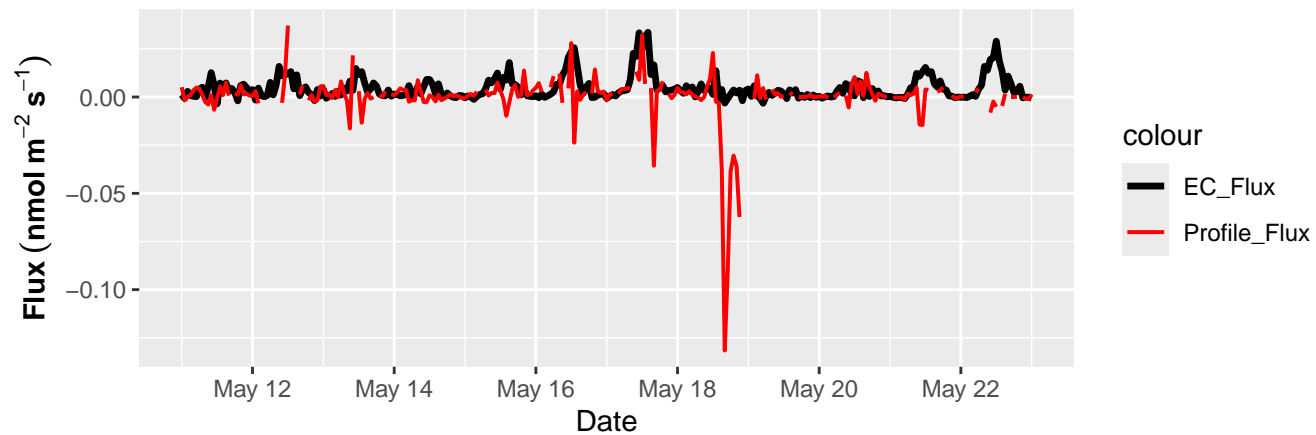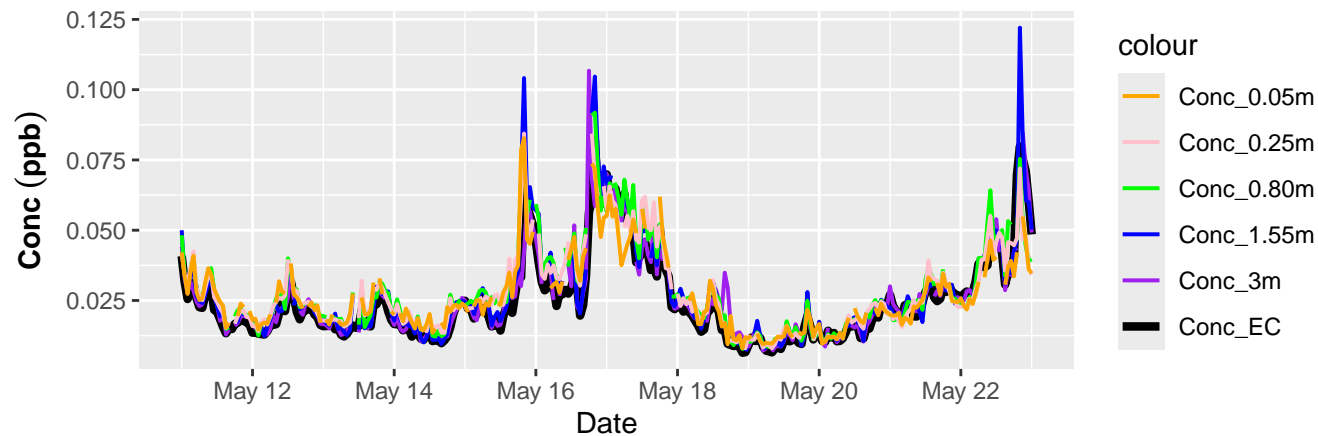



# m93.035

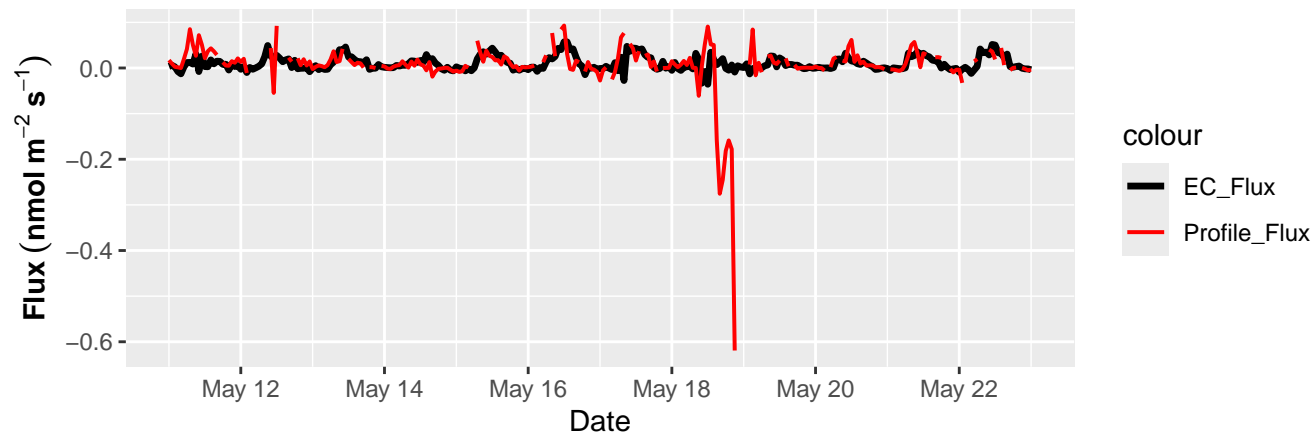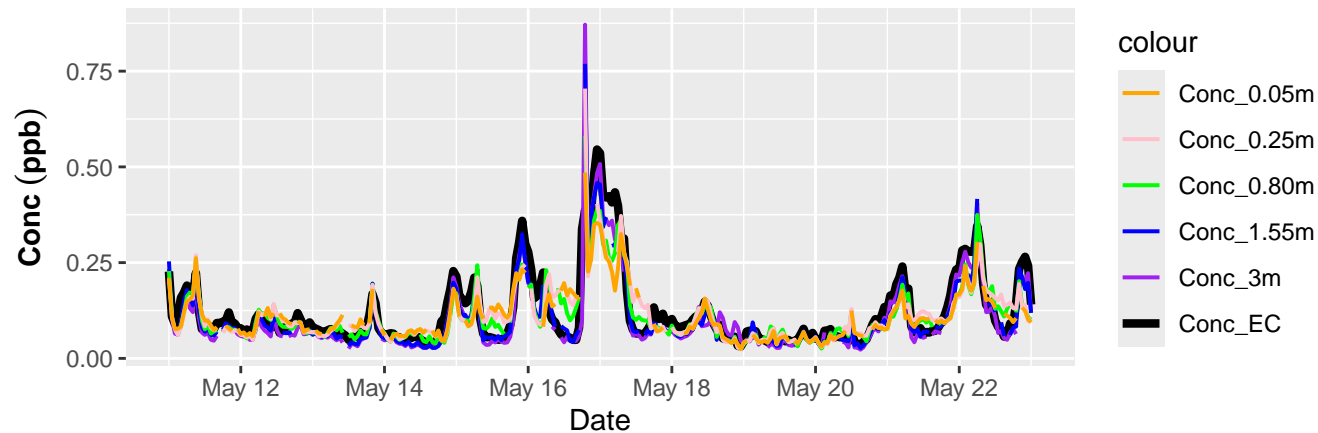

m95.015

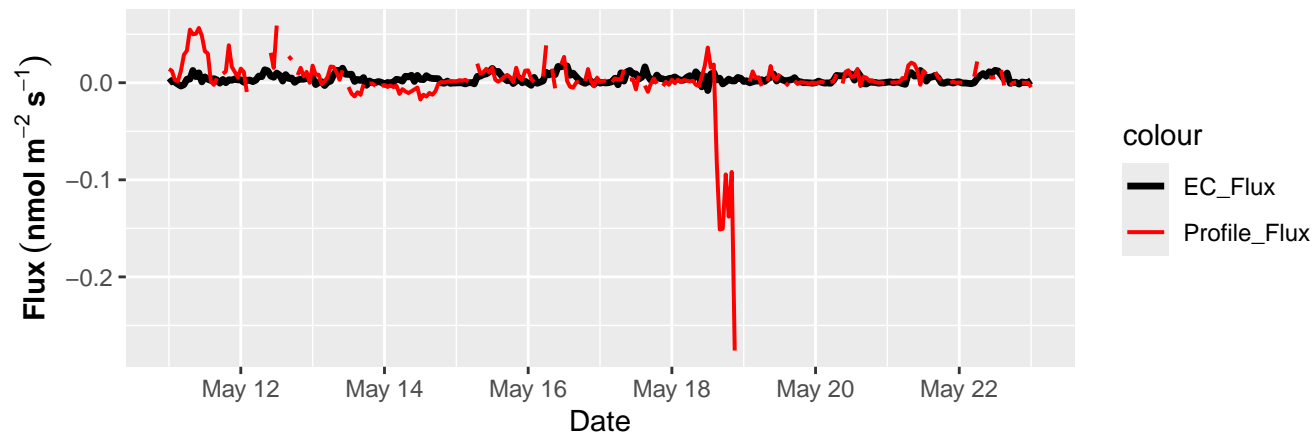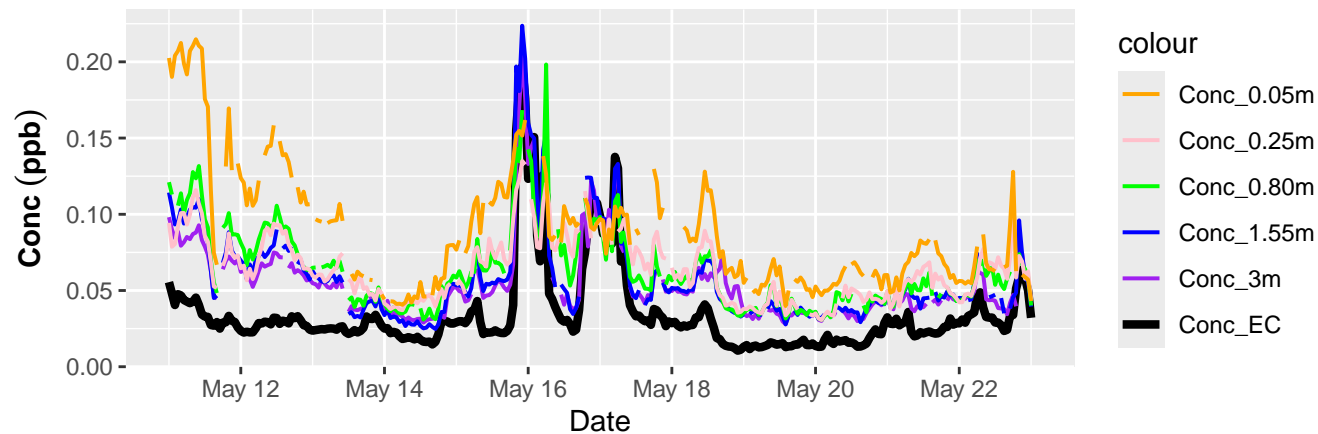

m95.083

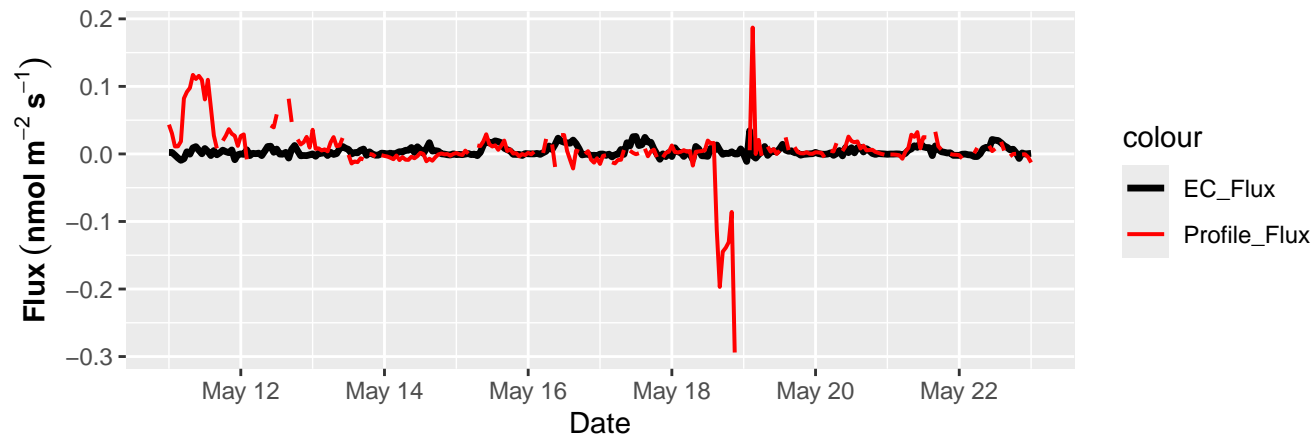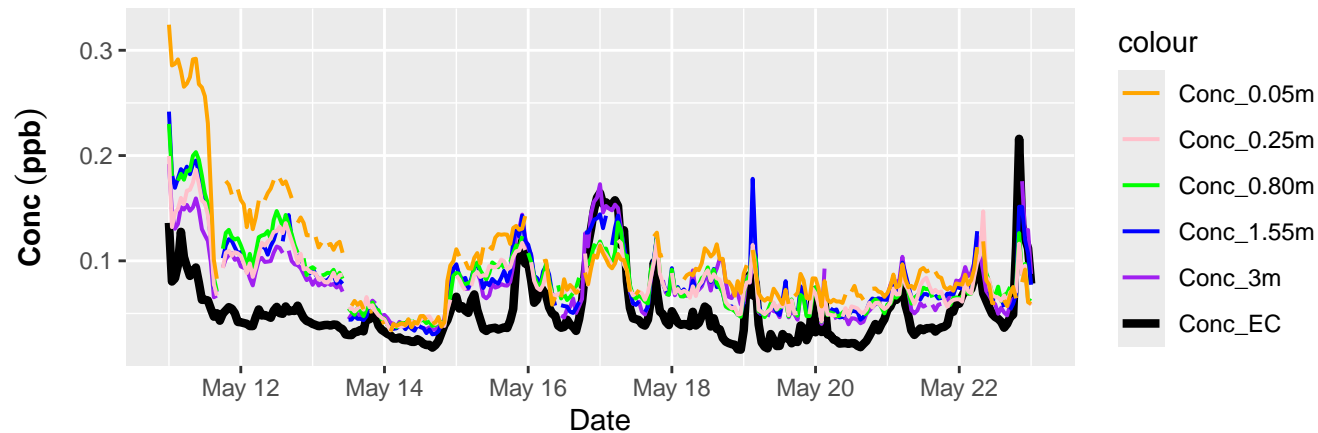

# m99.008

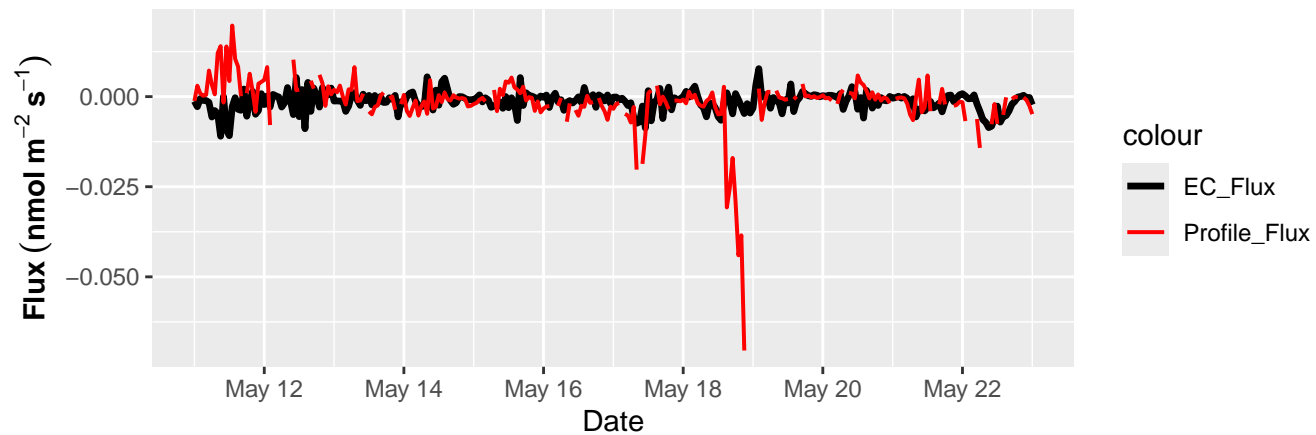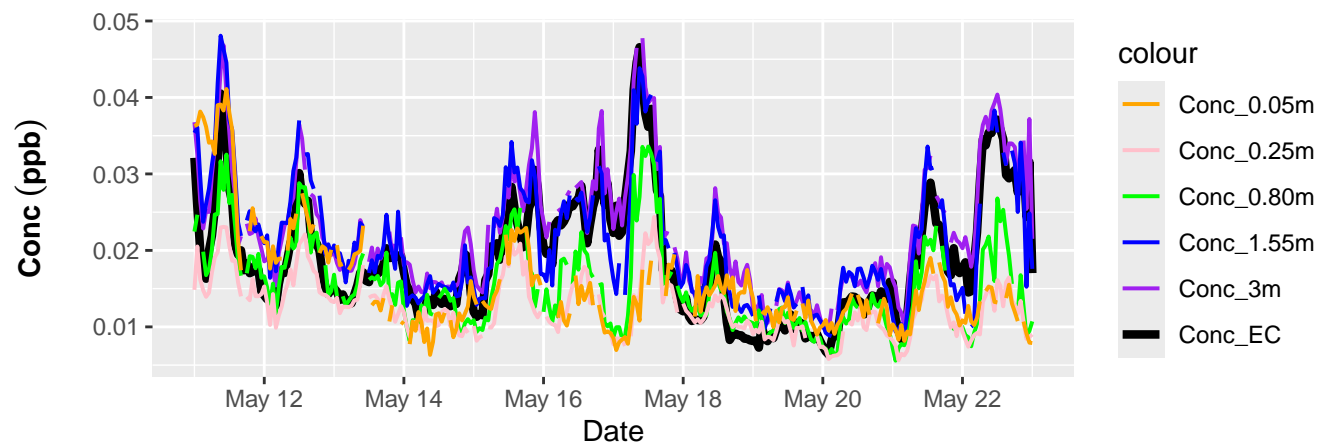

# m101.059

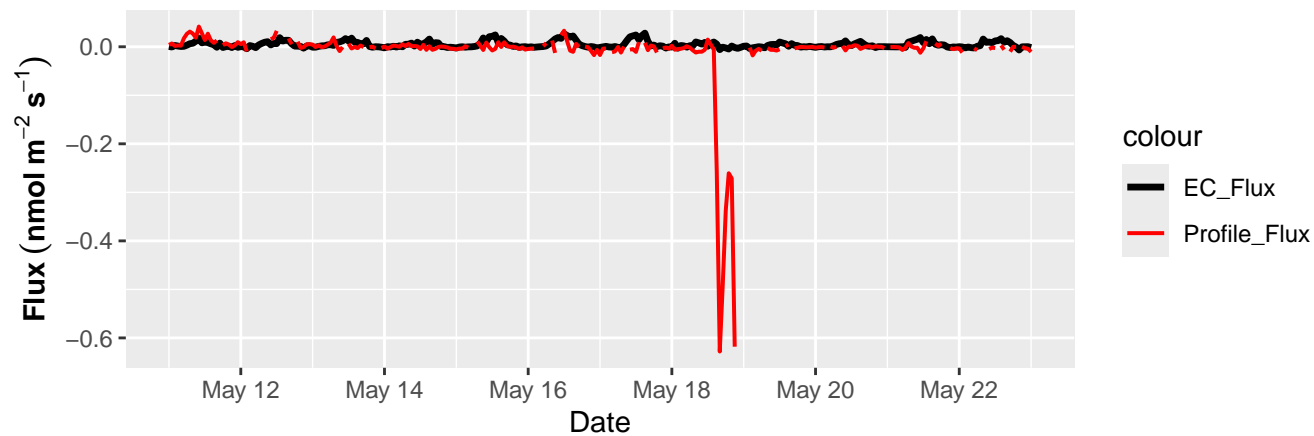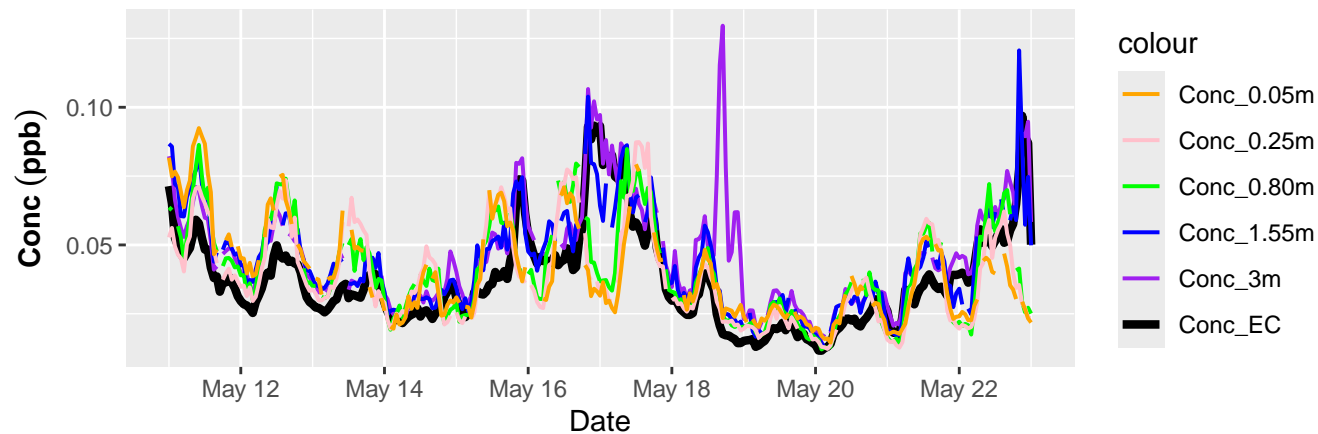

# m103.074

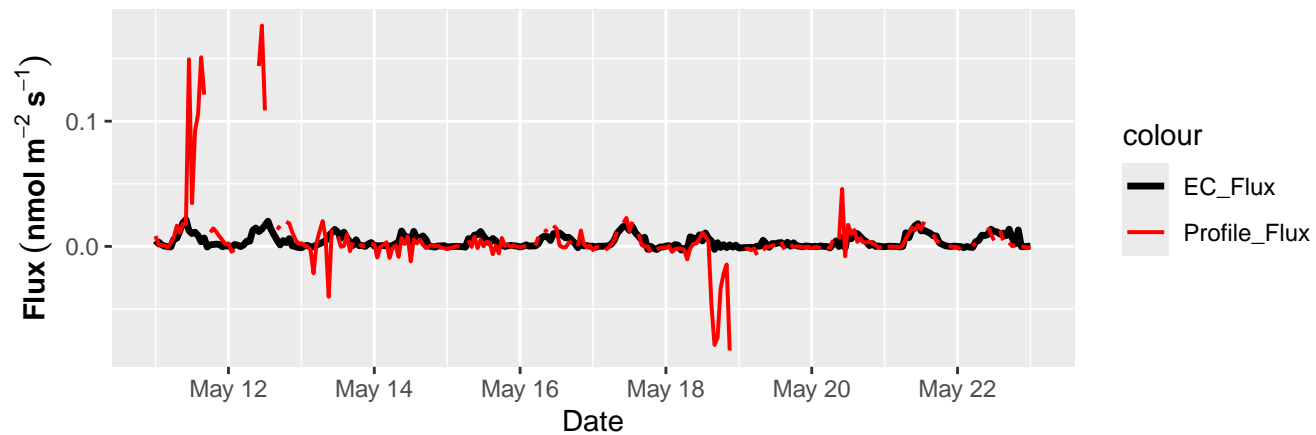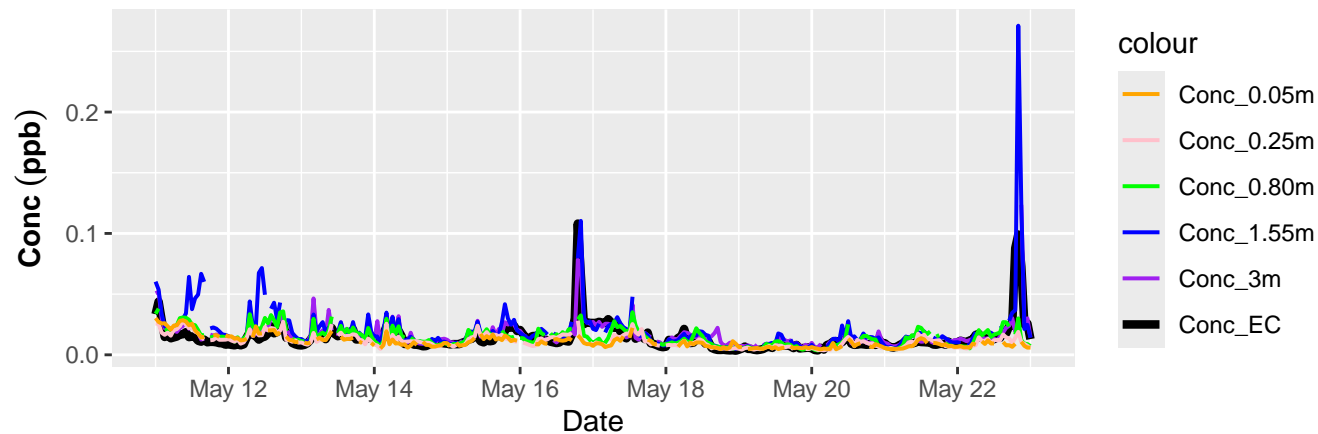

# m105.066

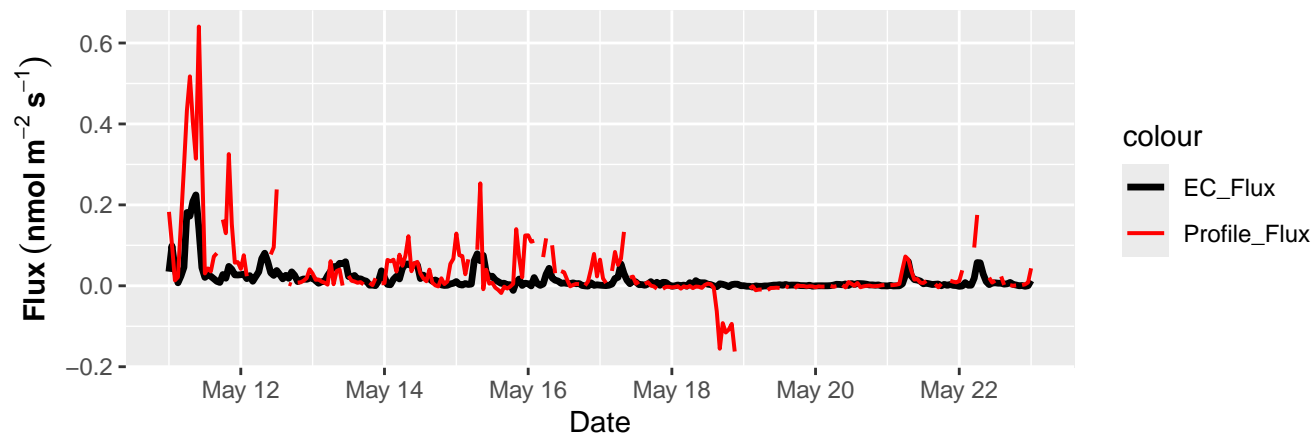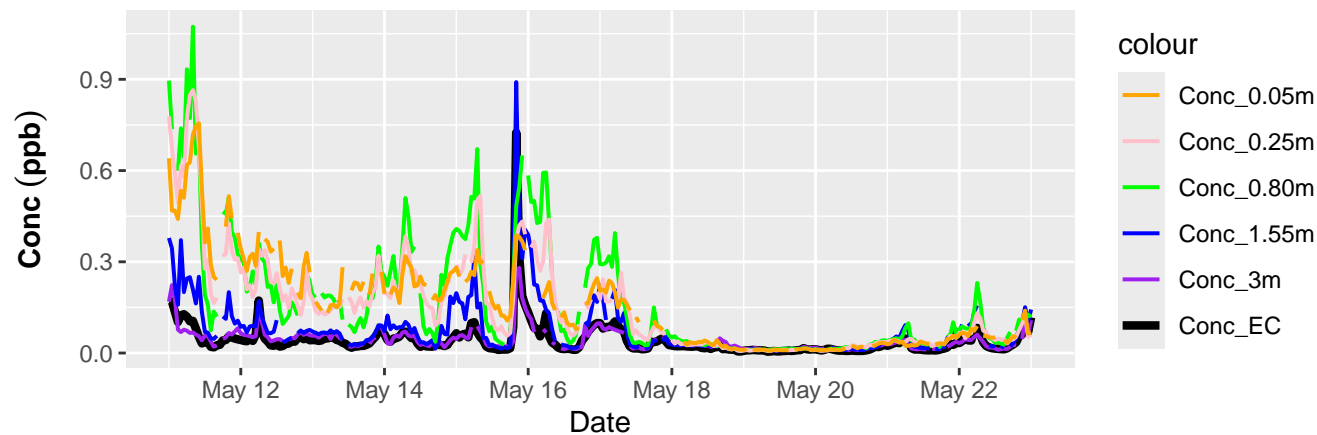

# m109.100

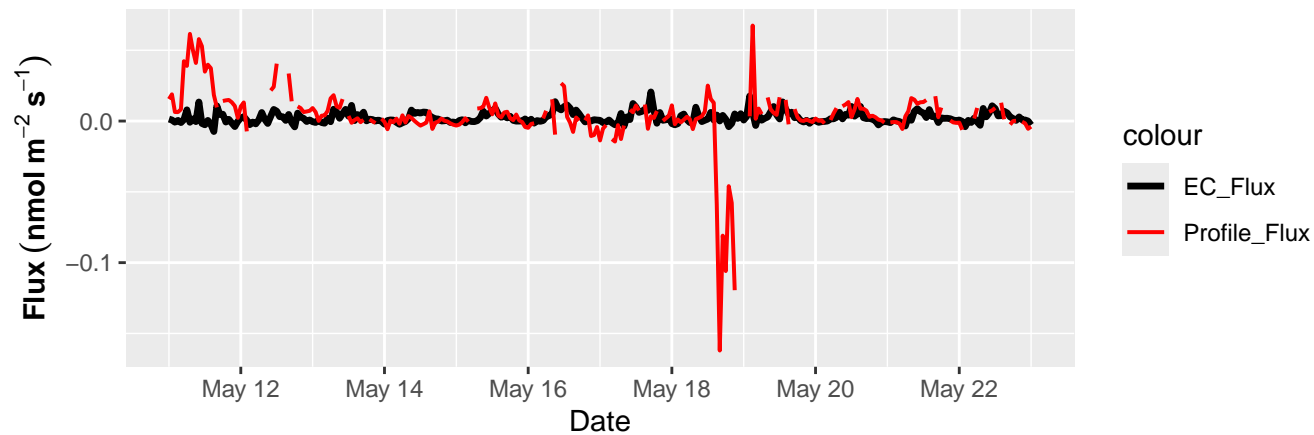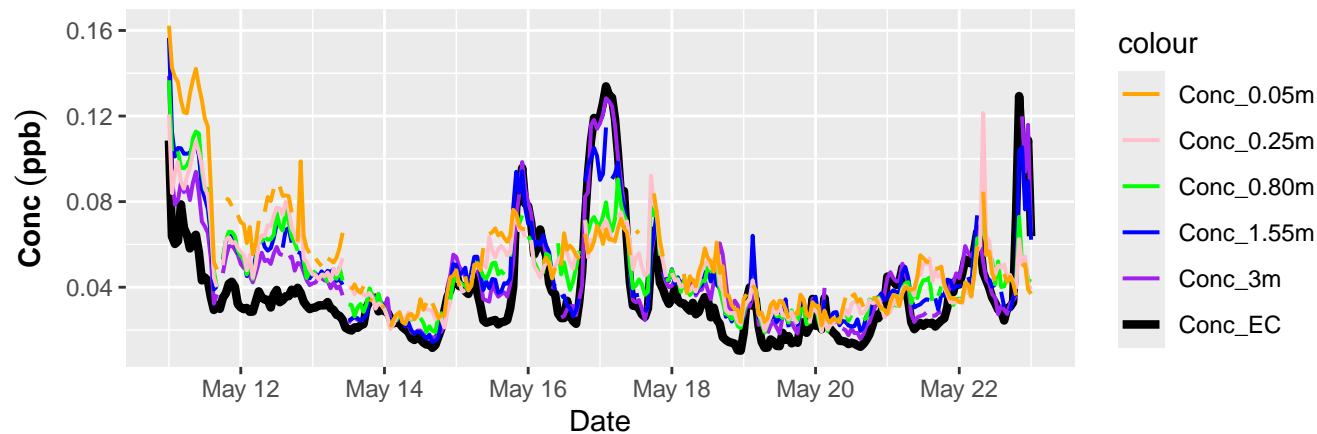



m115.078

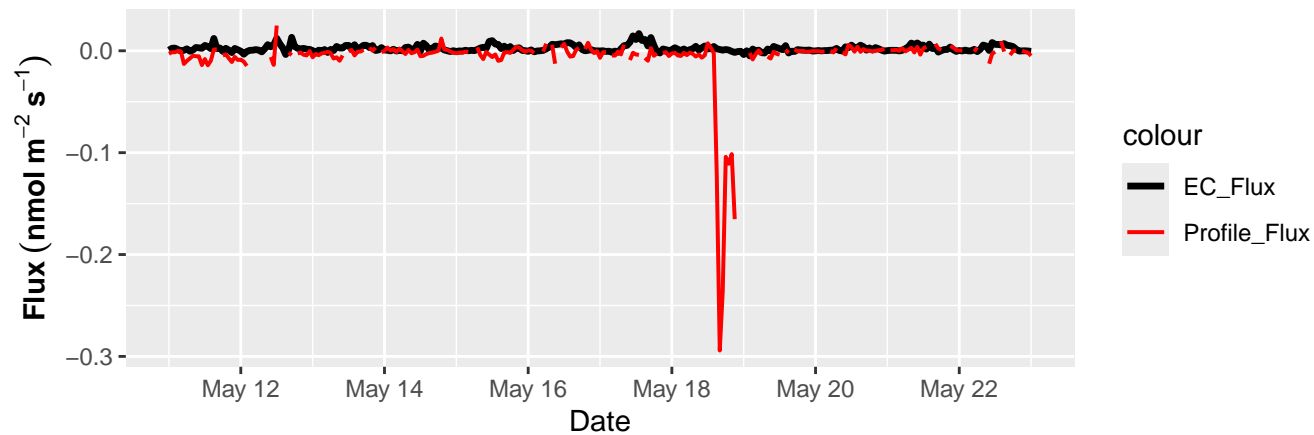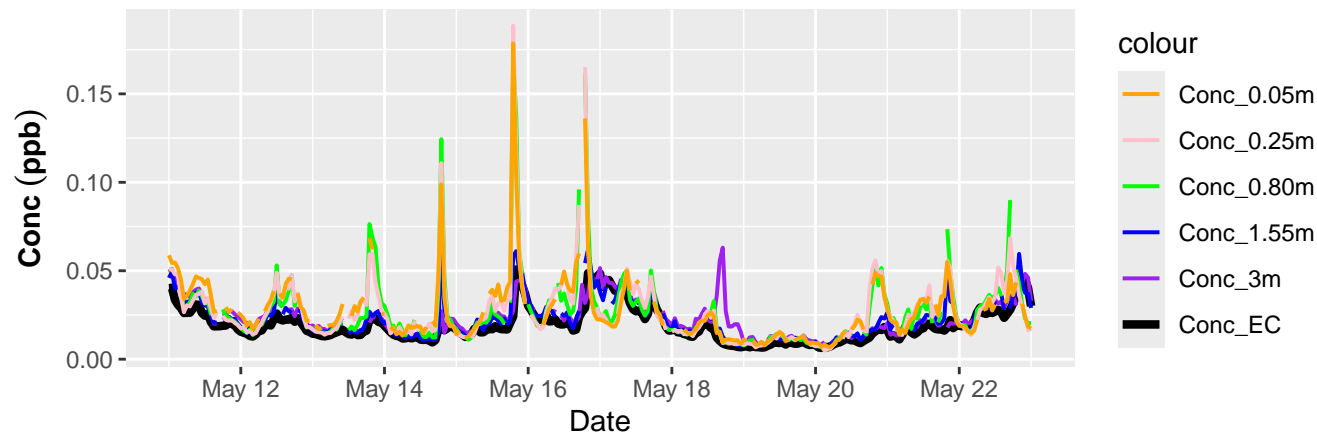

# m118.074

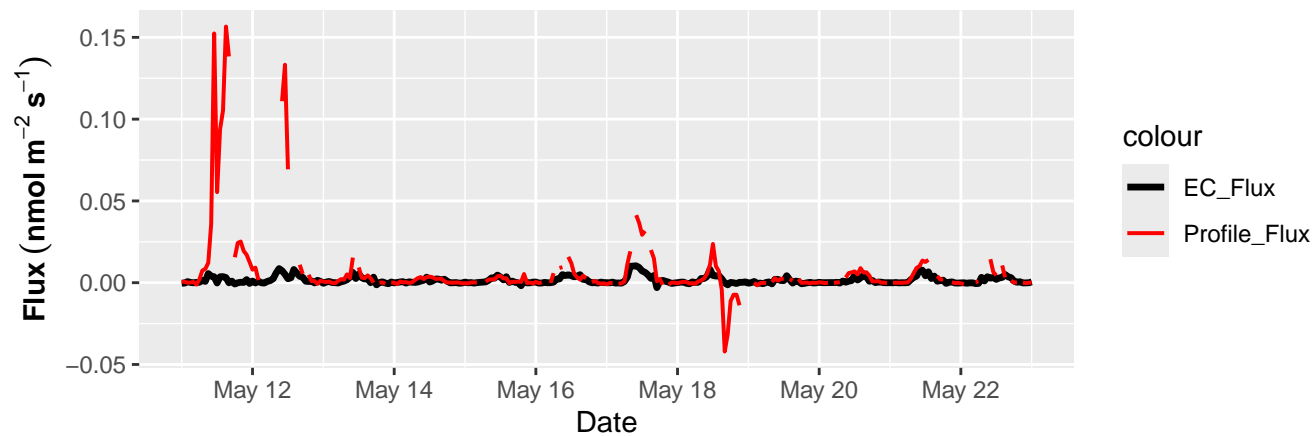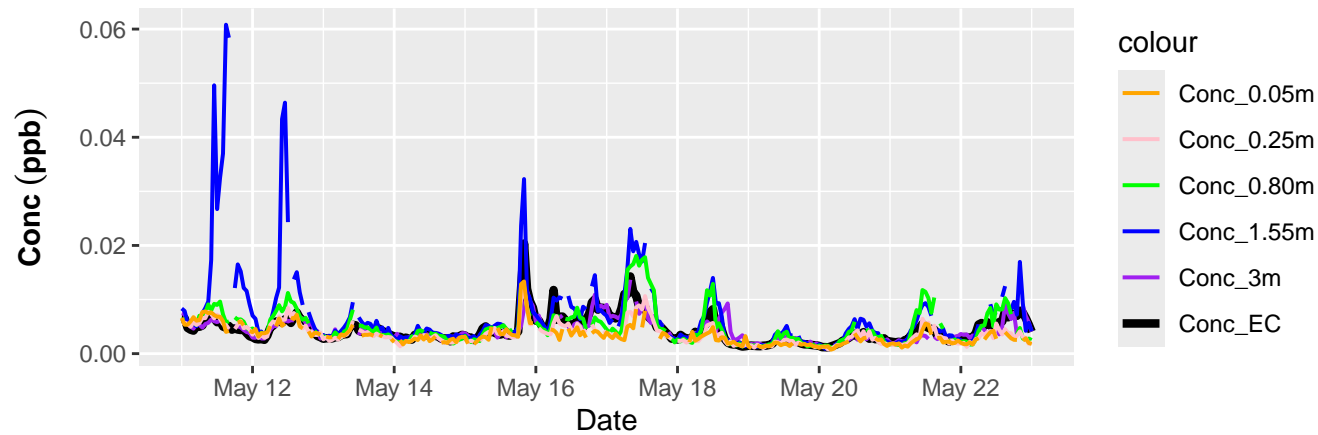

# m121.098

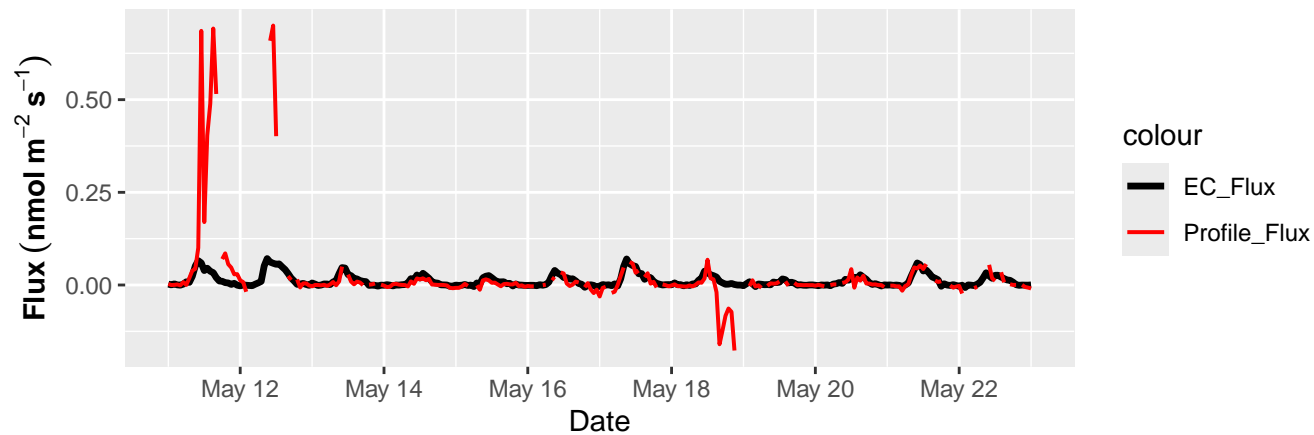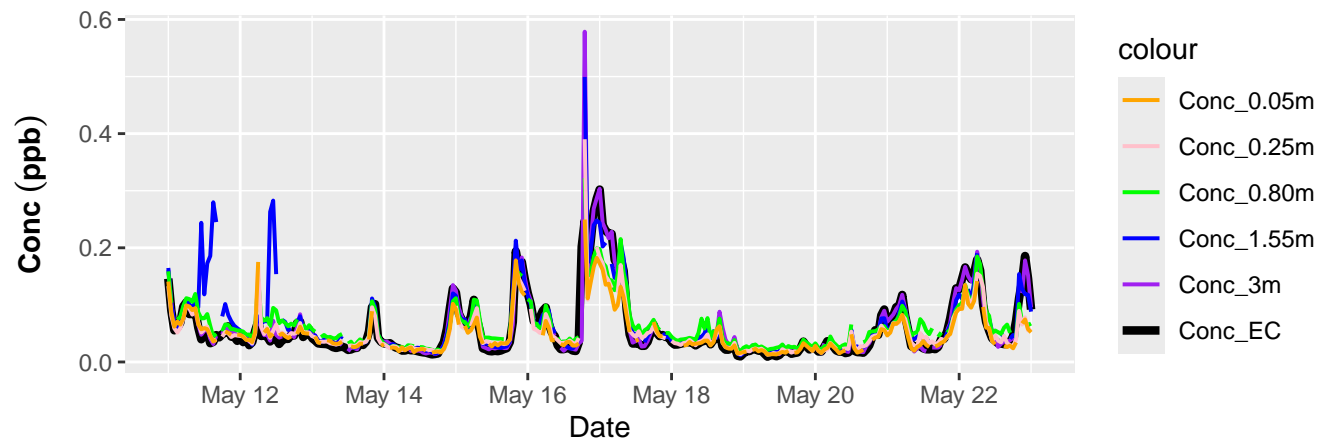

# m137.129

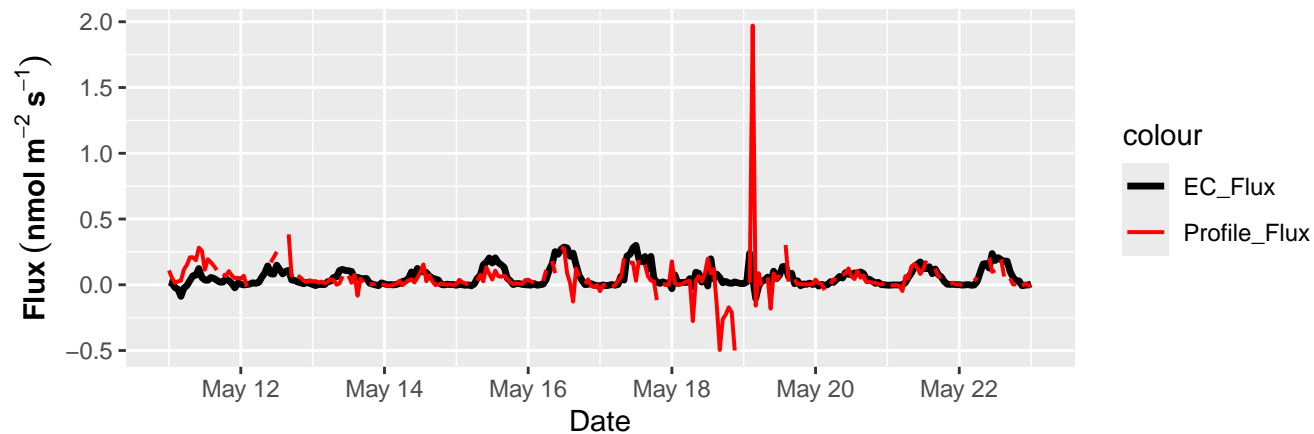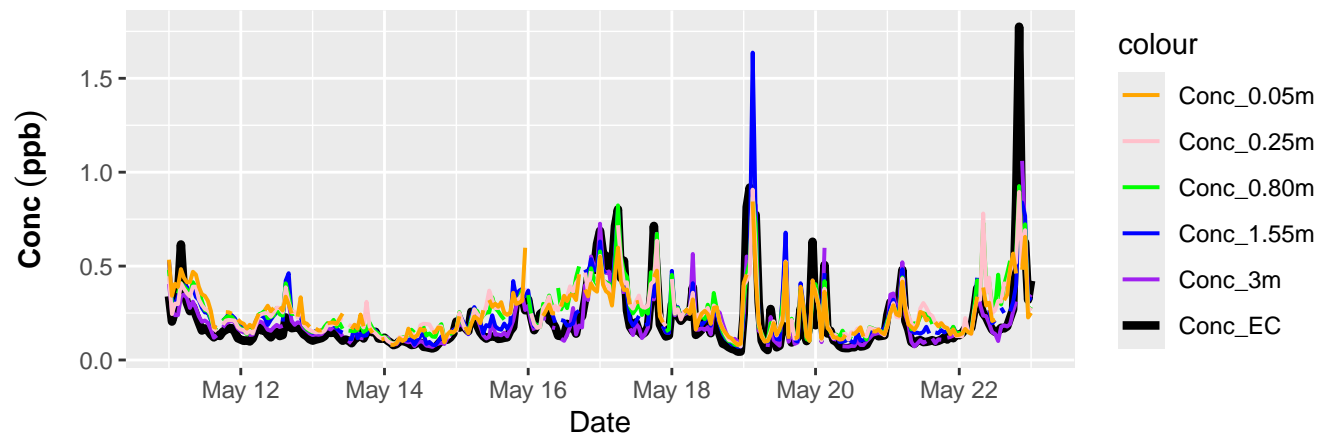

# m167.052

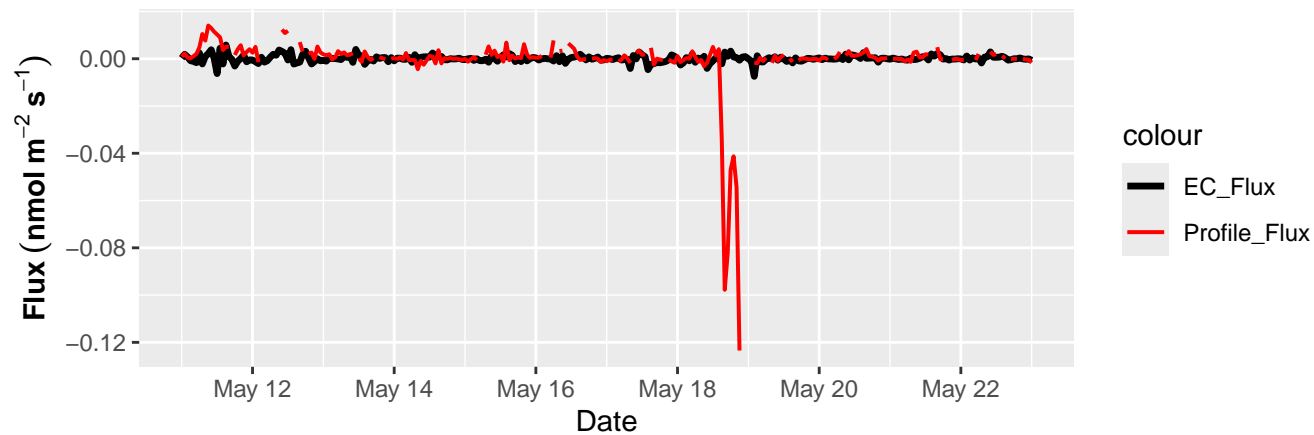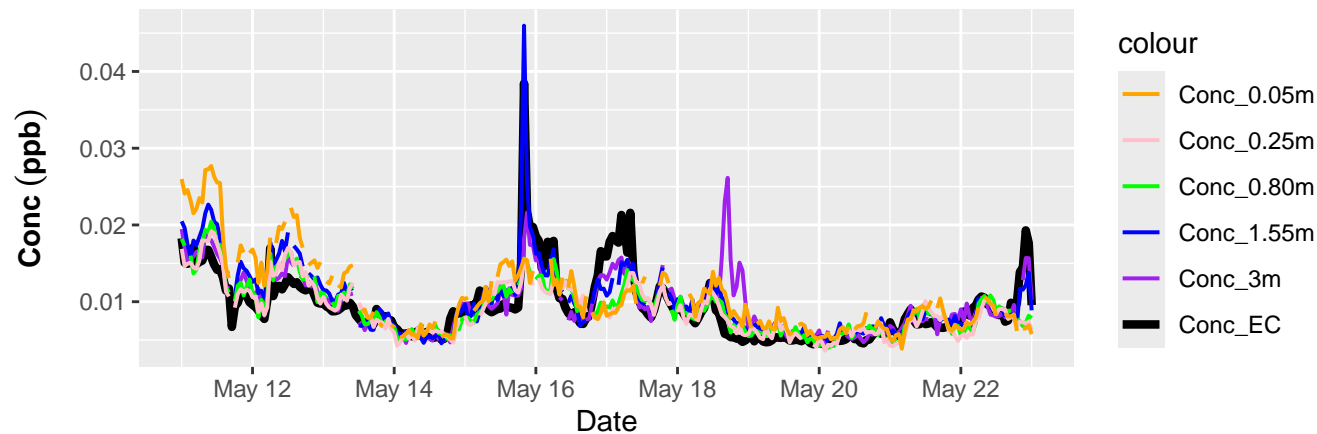

m205.186

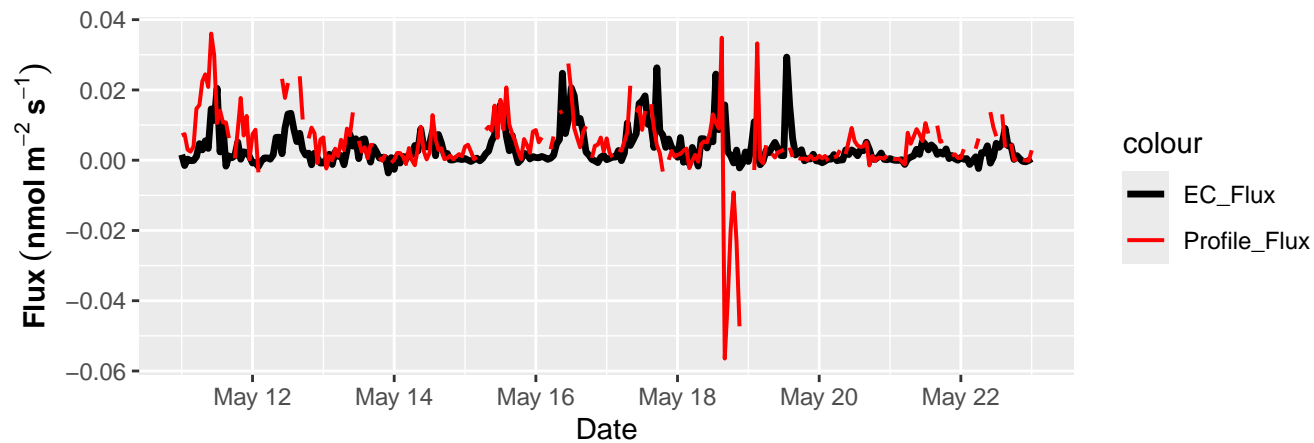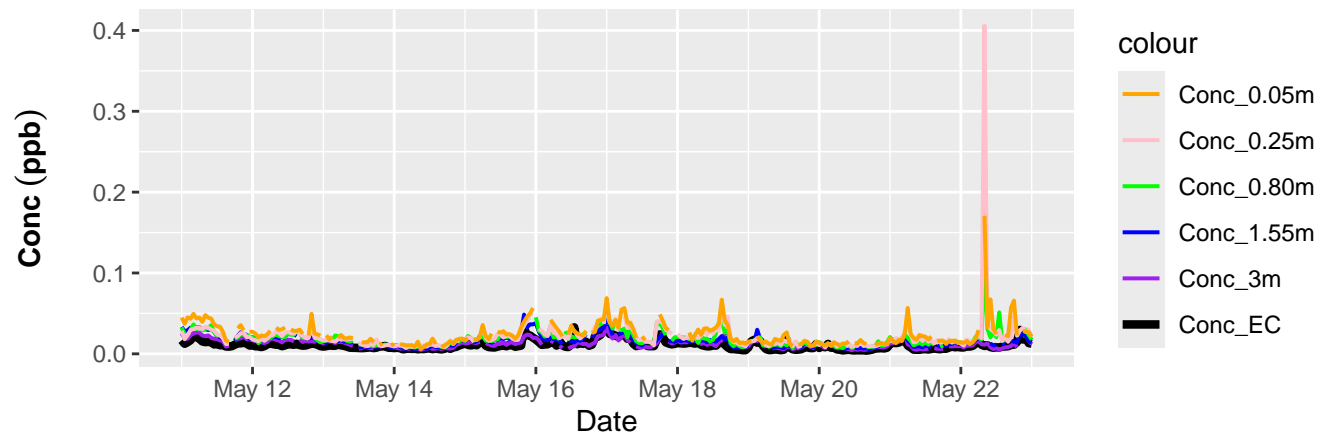

m223.057

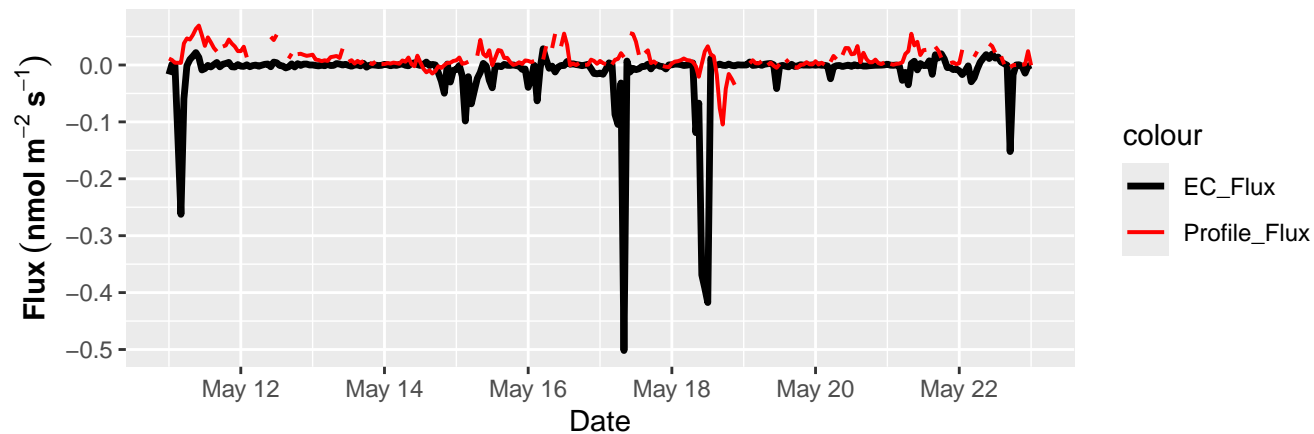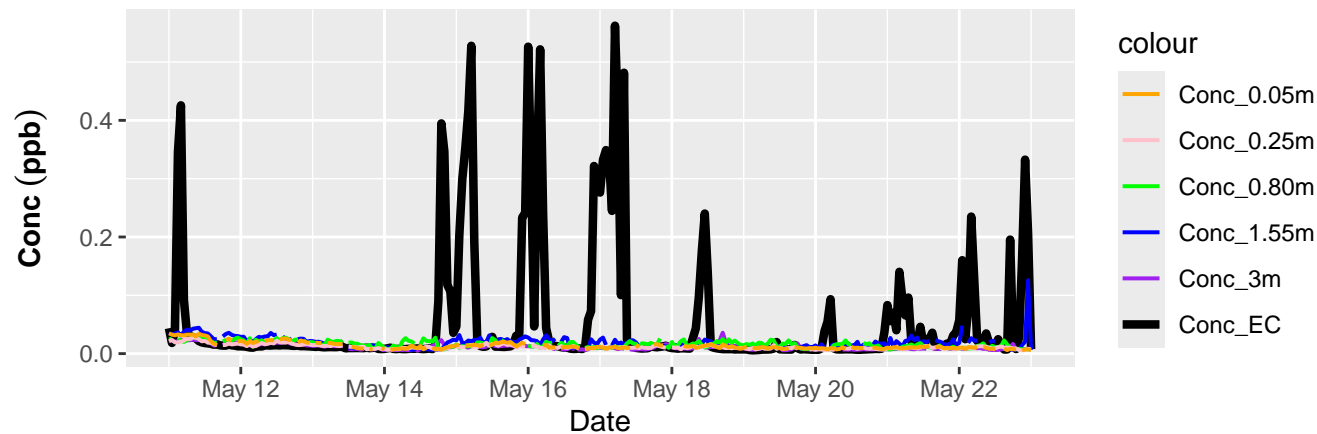

# m247.006

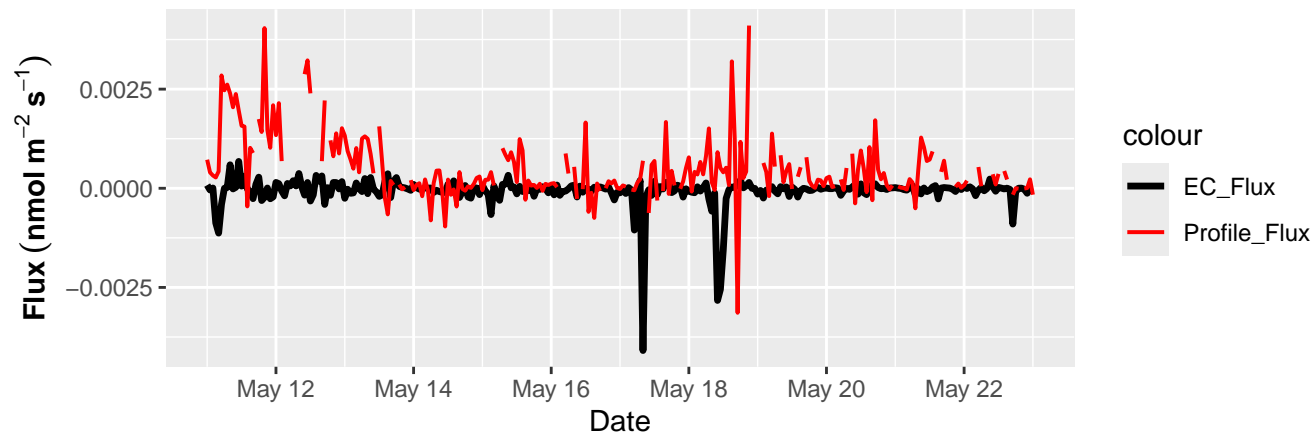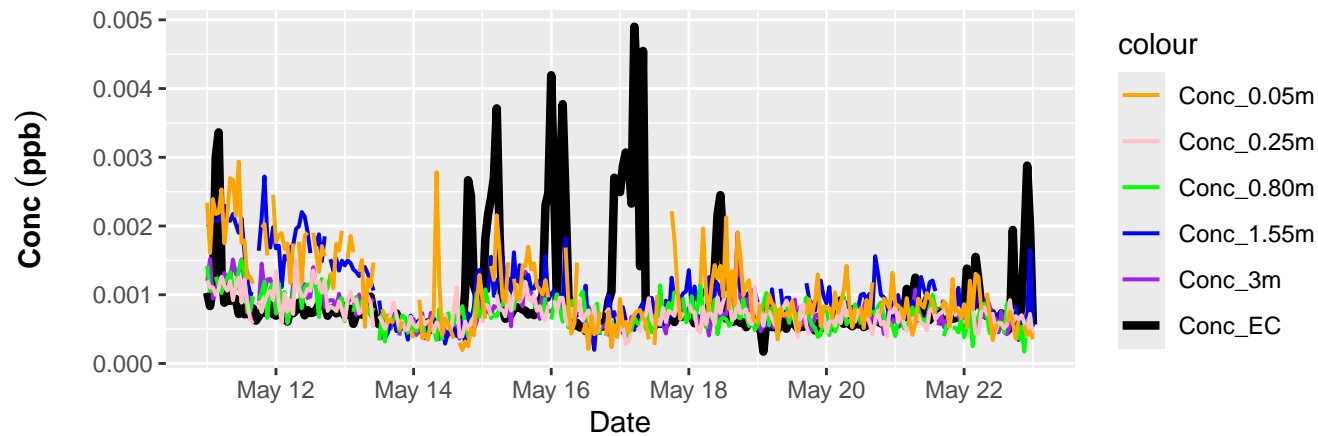



m297.071

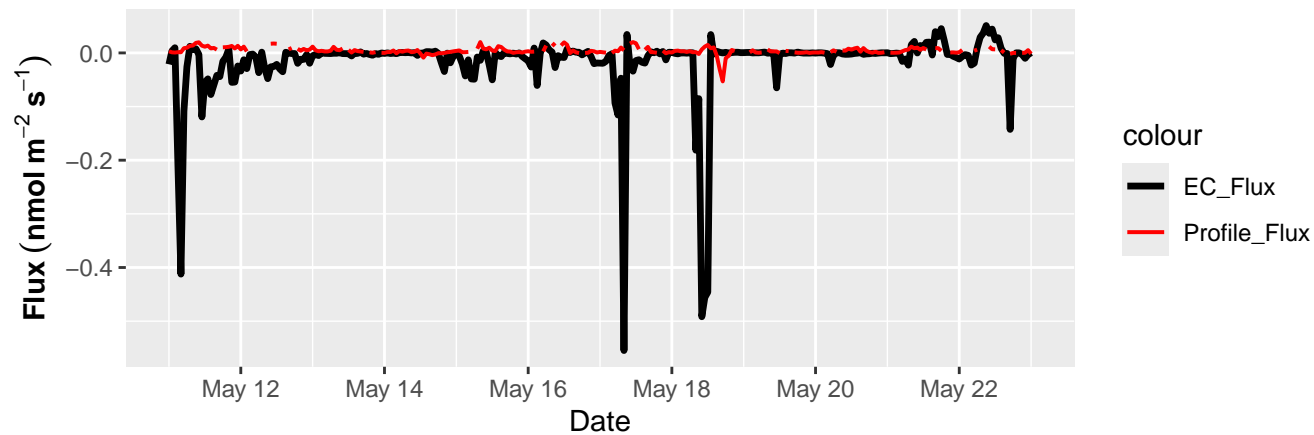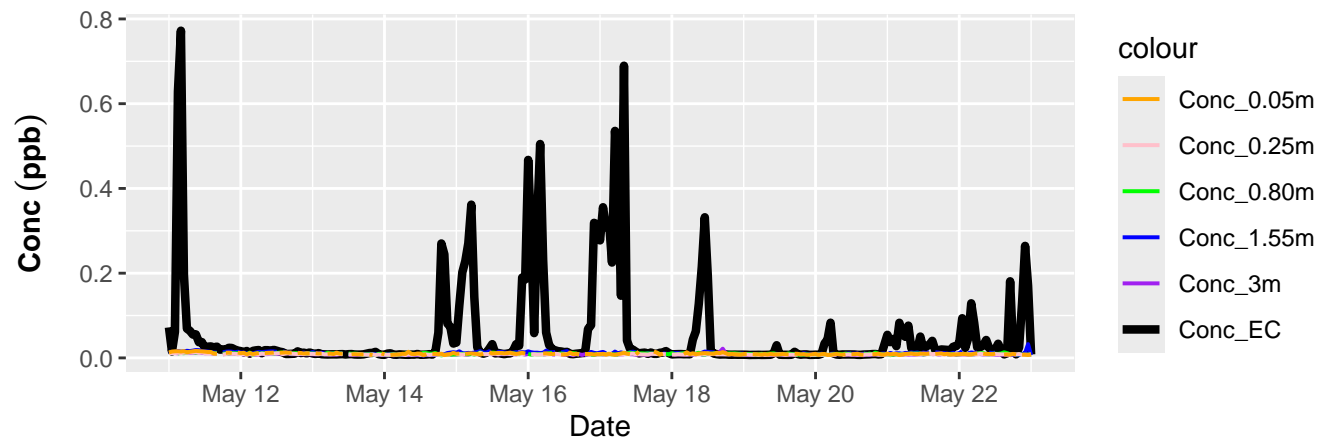

**m355.051**

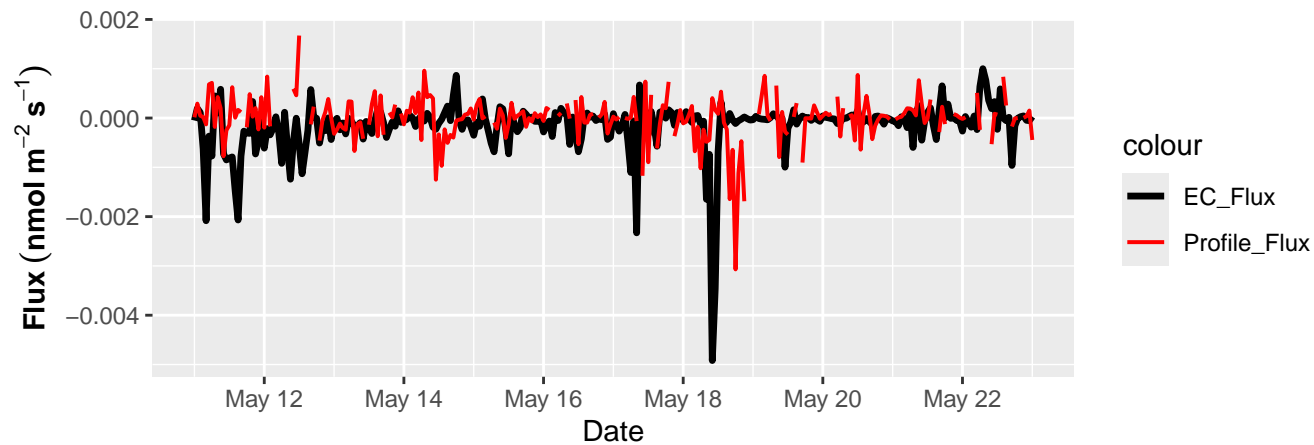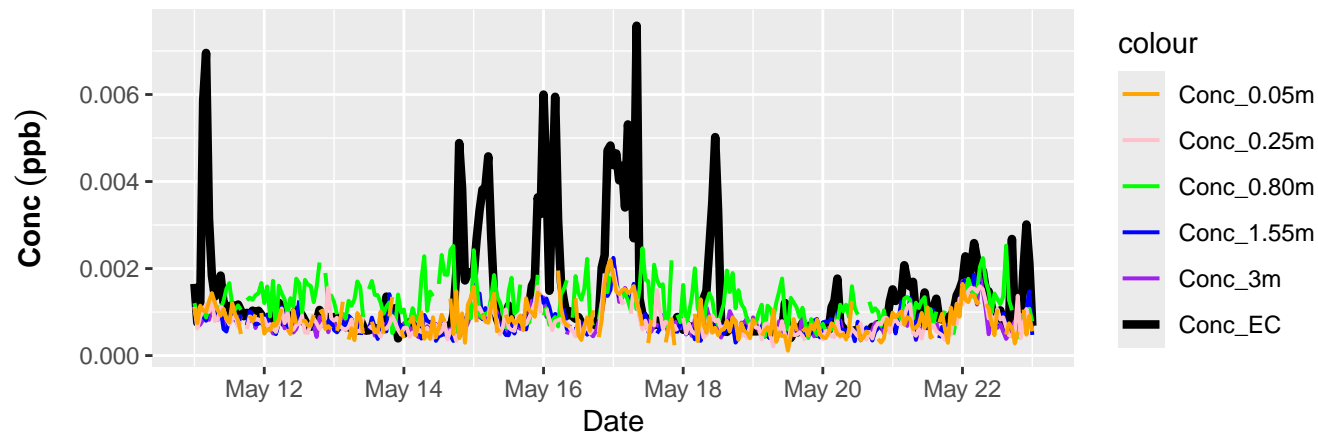

Supplement: Supplementary file 3 [file Fig. S05b - Comparison between EC and profile fluxes - 11 to 22May.pdf › Supplementary Material/Fig. S05b - Comparison between EC and profile fluxes - 11 to 22May.pdf]

# m31.018

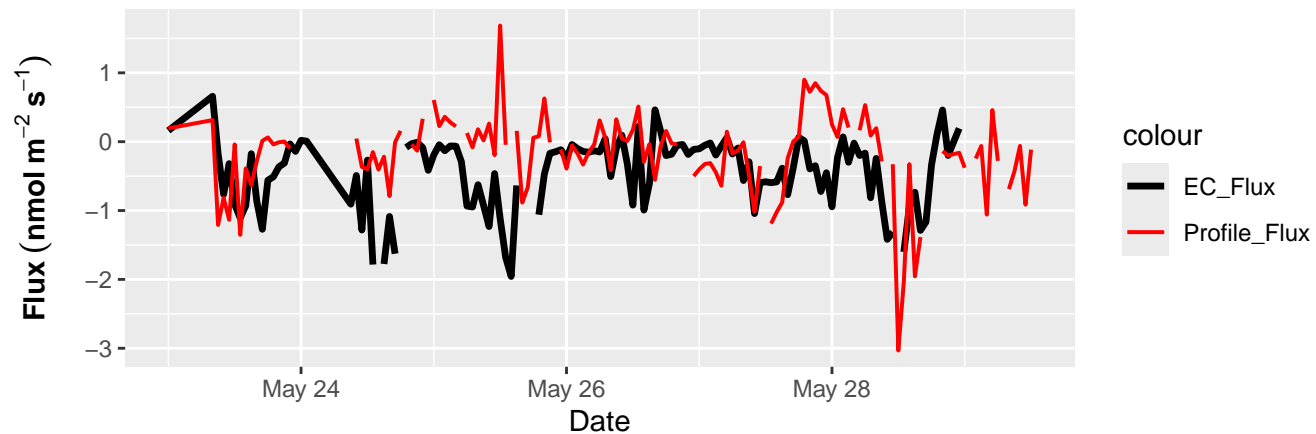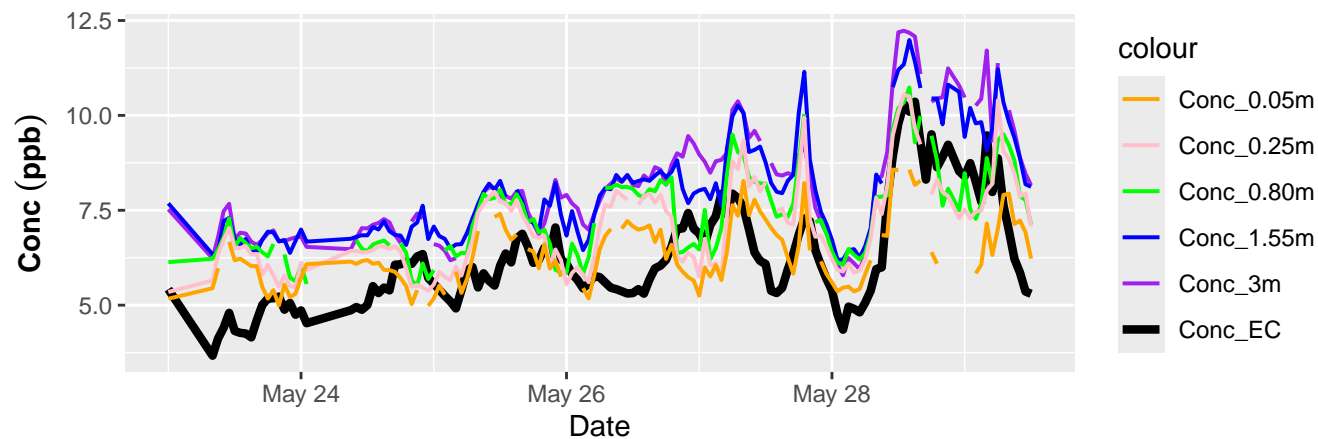

# m33.033

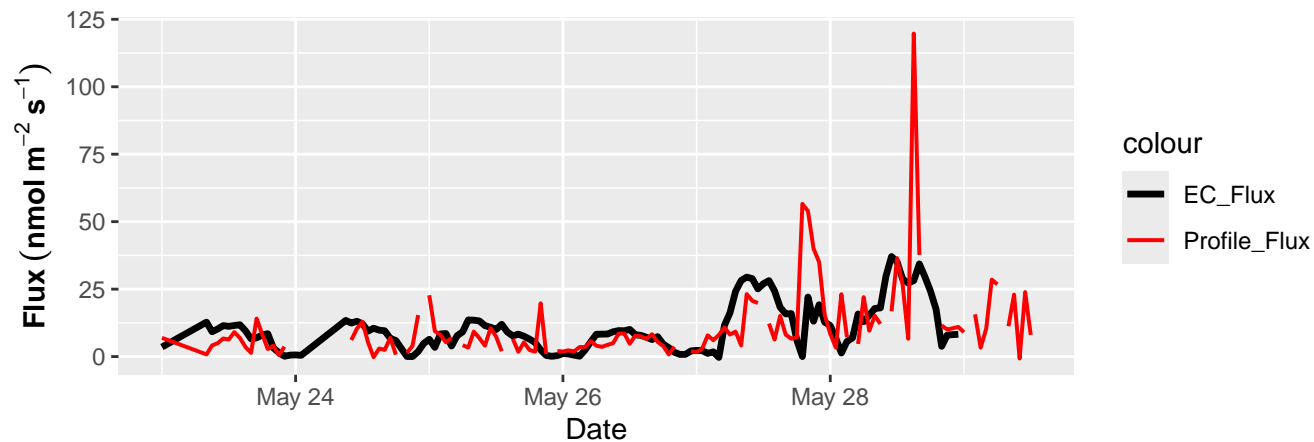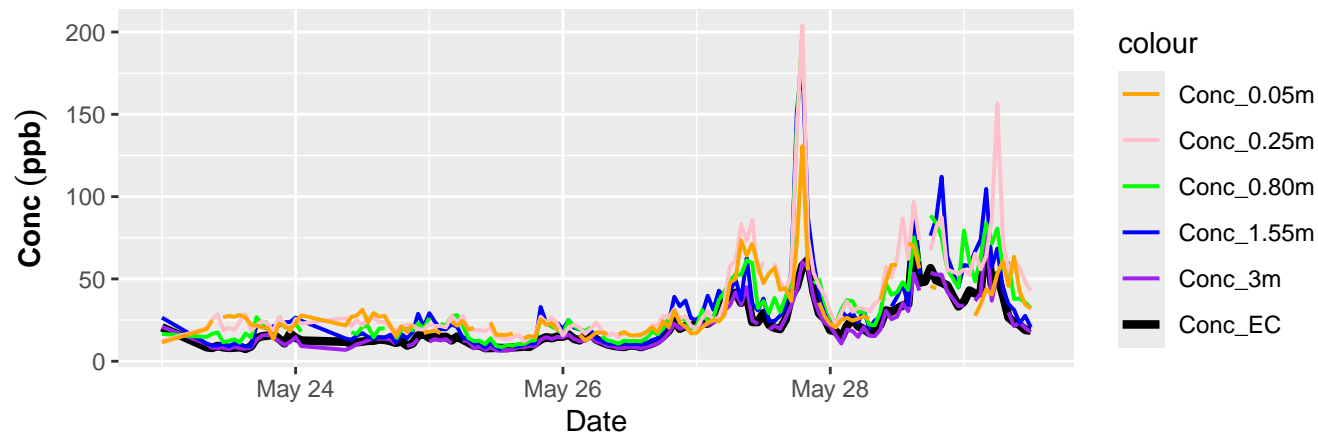

# m41.038

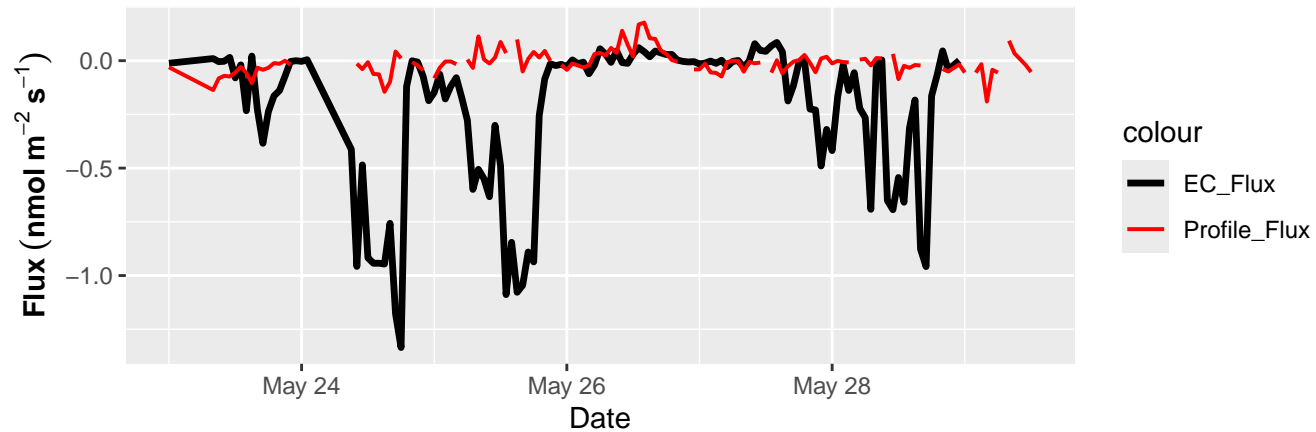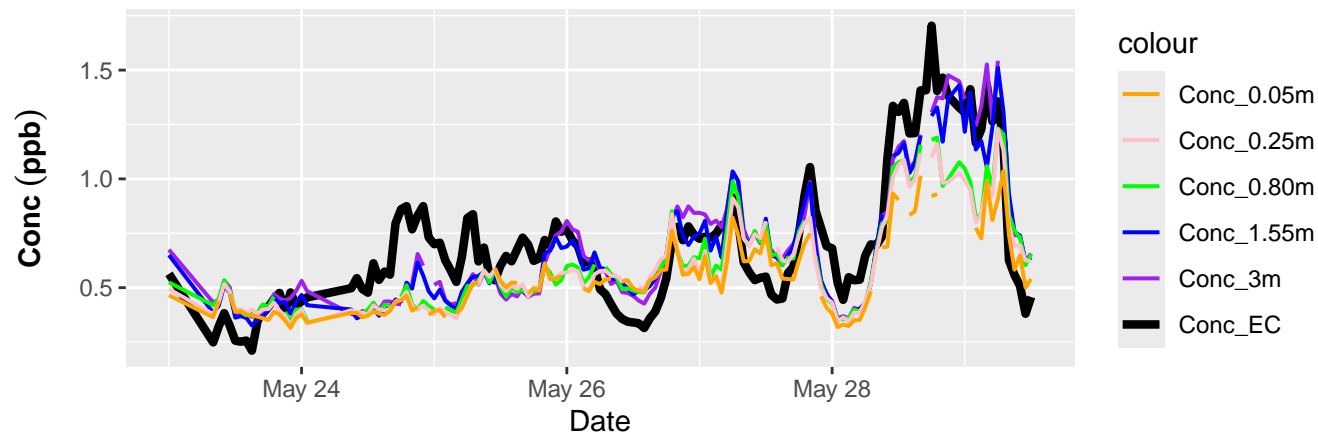

# m43.018

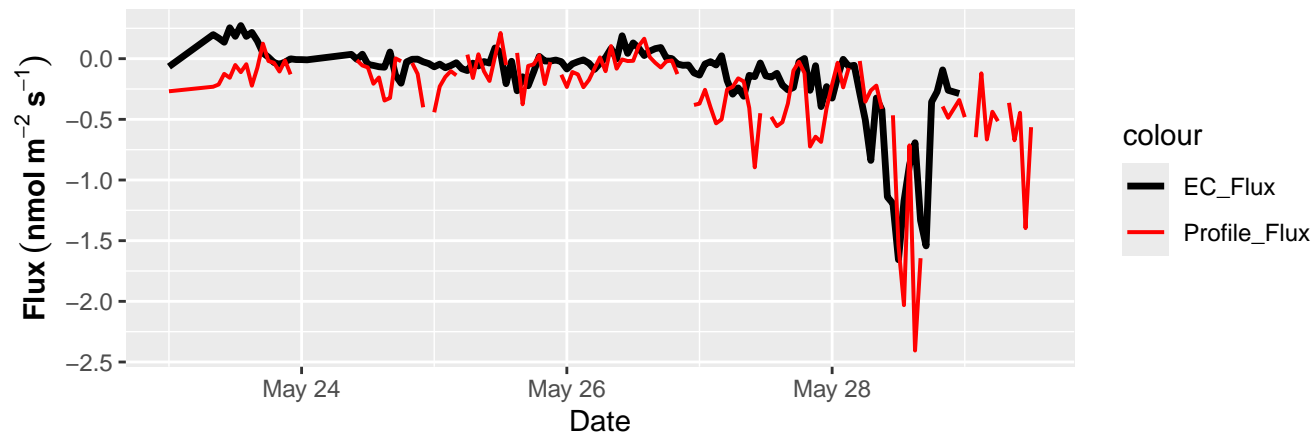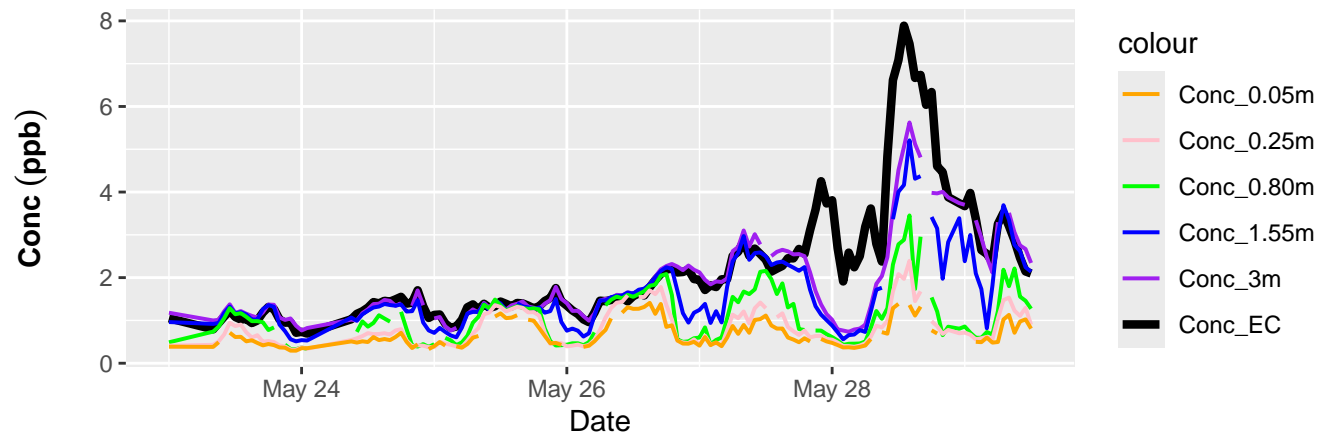

**m45.033**

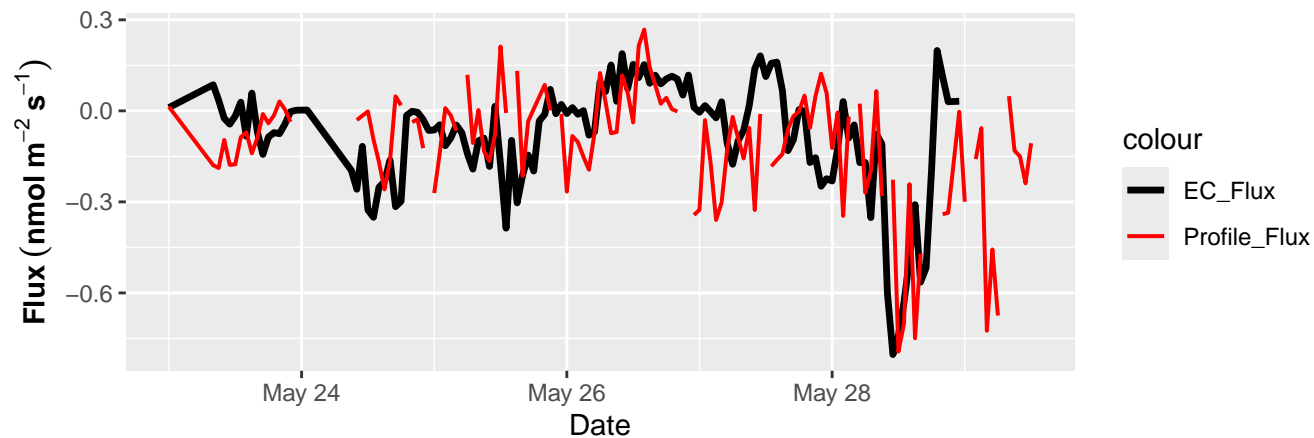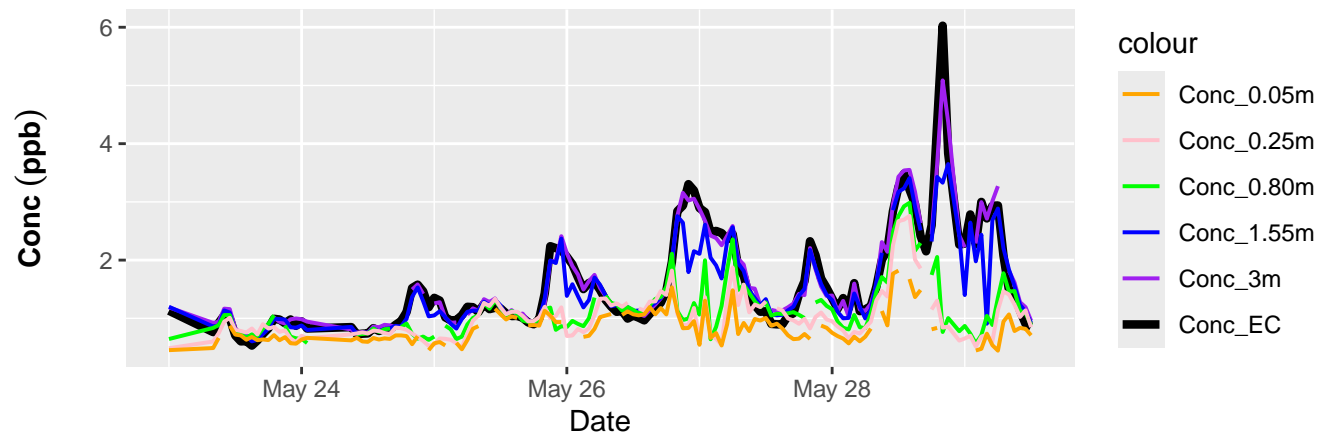

# m47.013

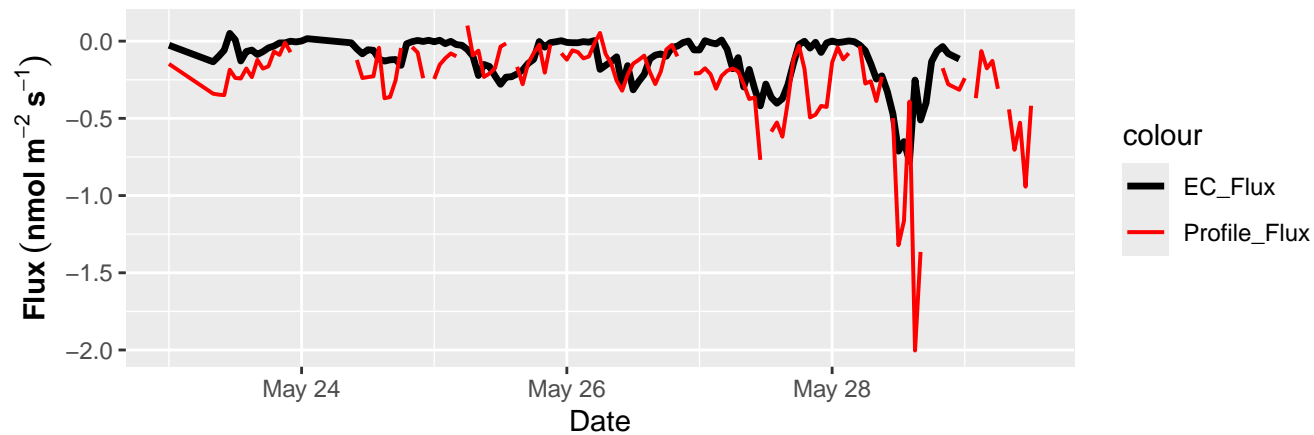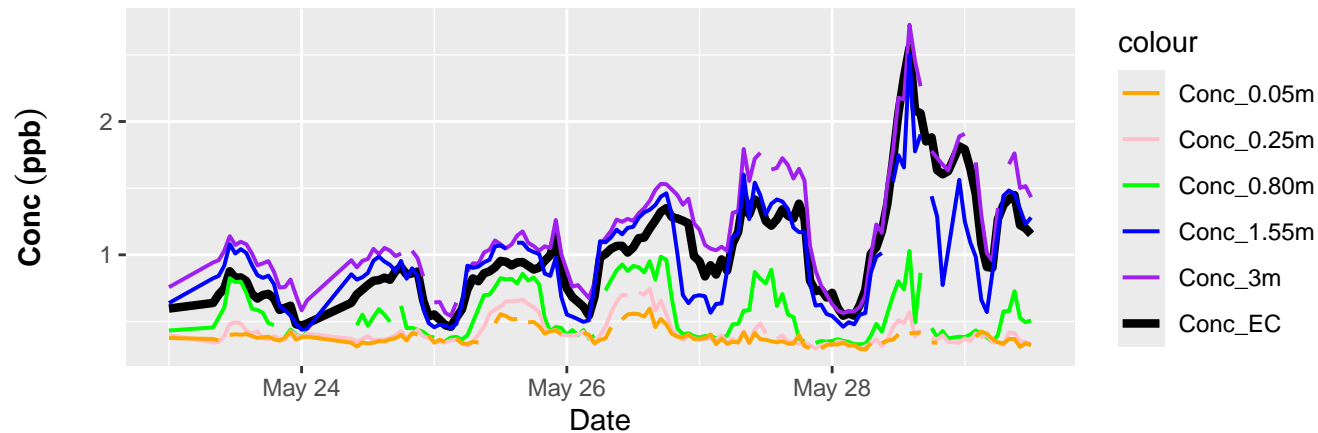

# m49.014

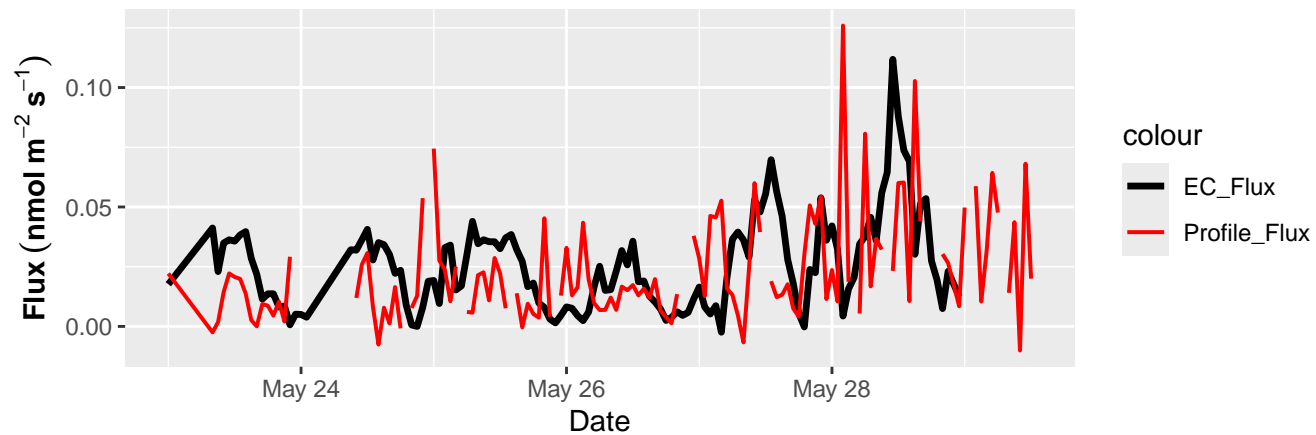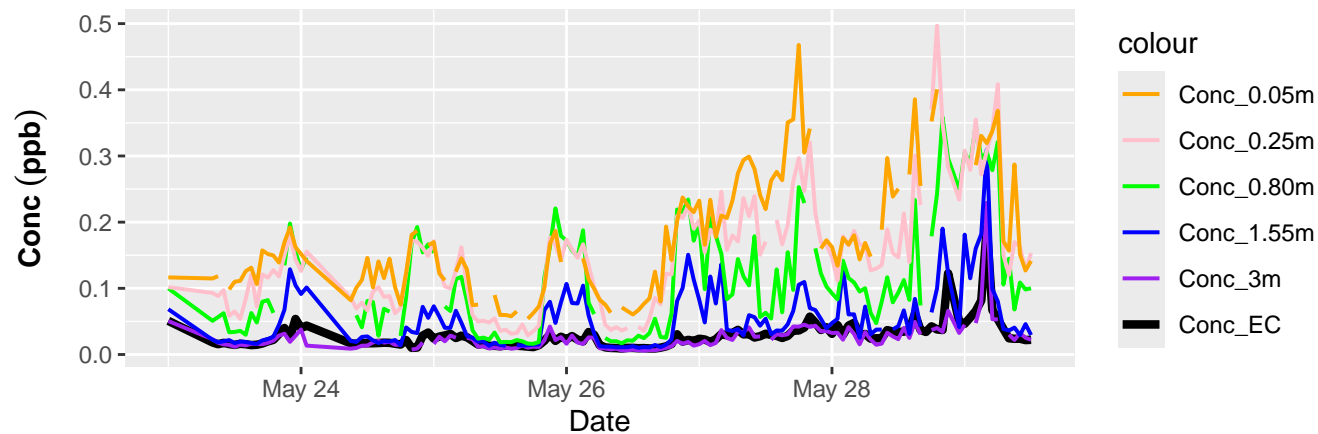

# m51.022

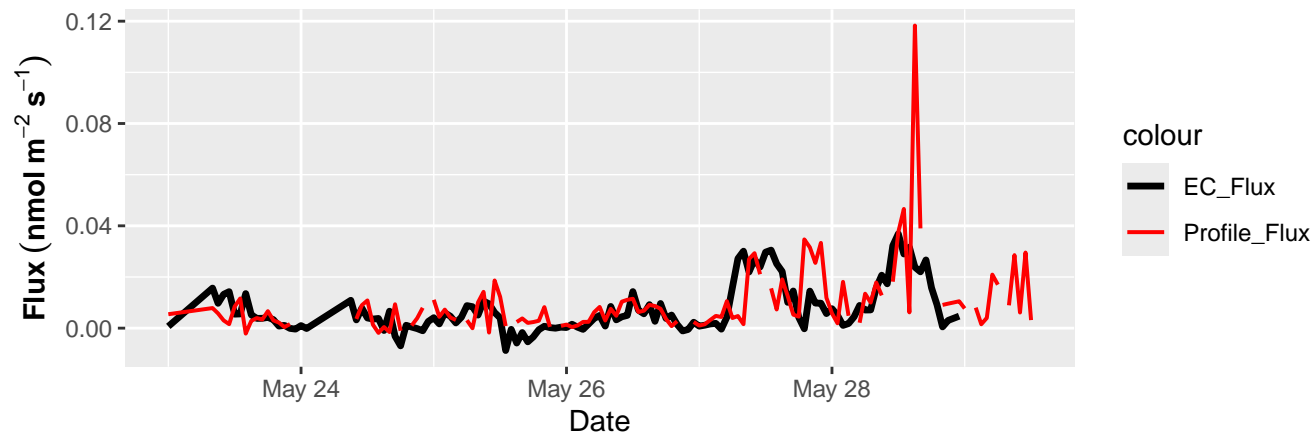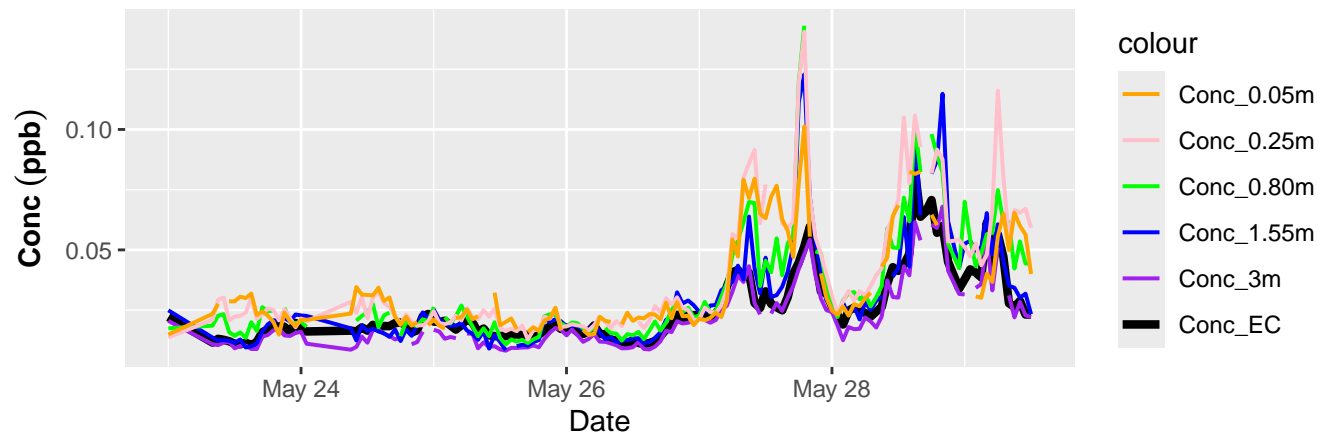



m57.069

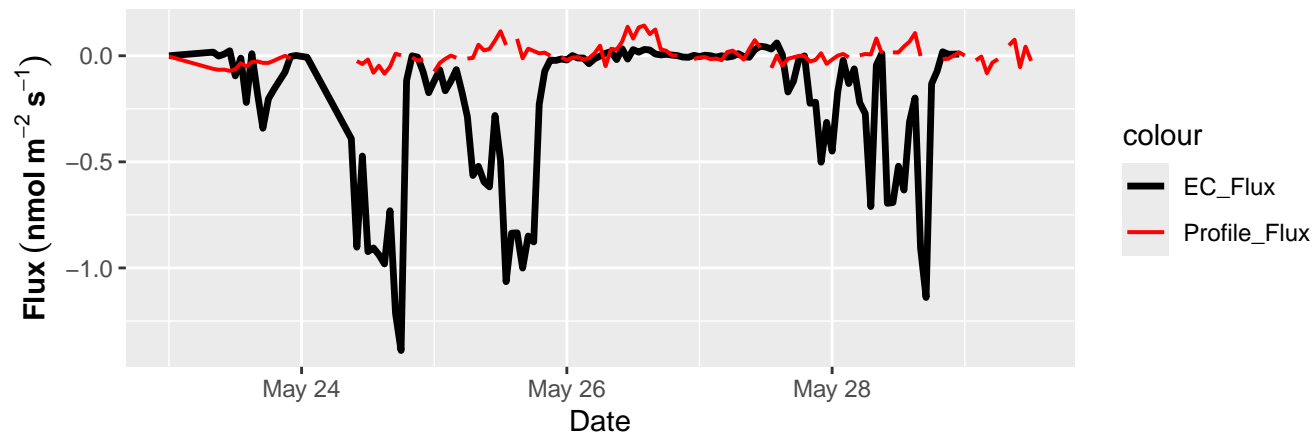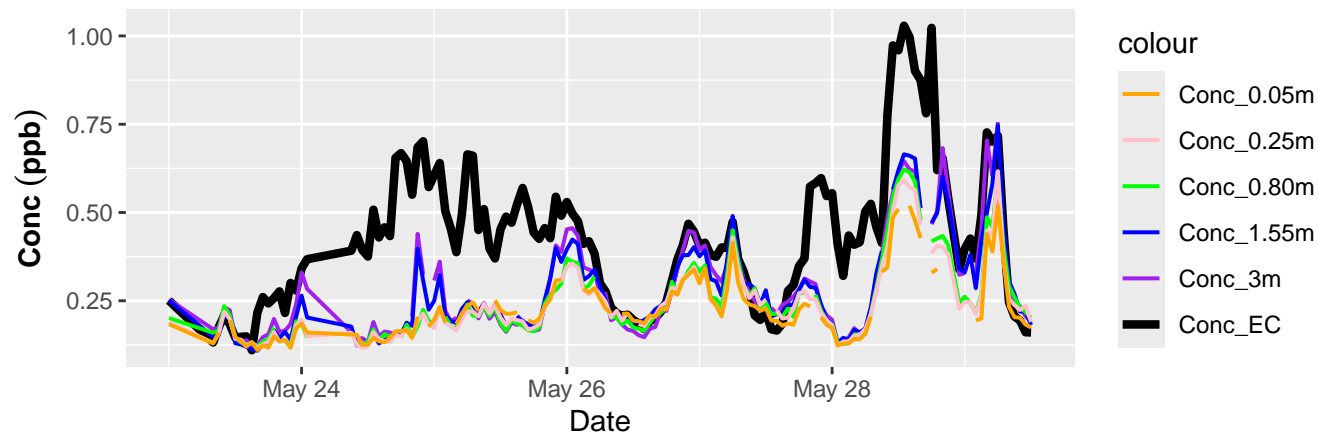

m59.049

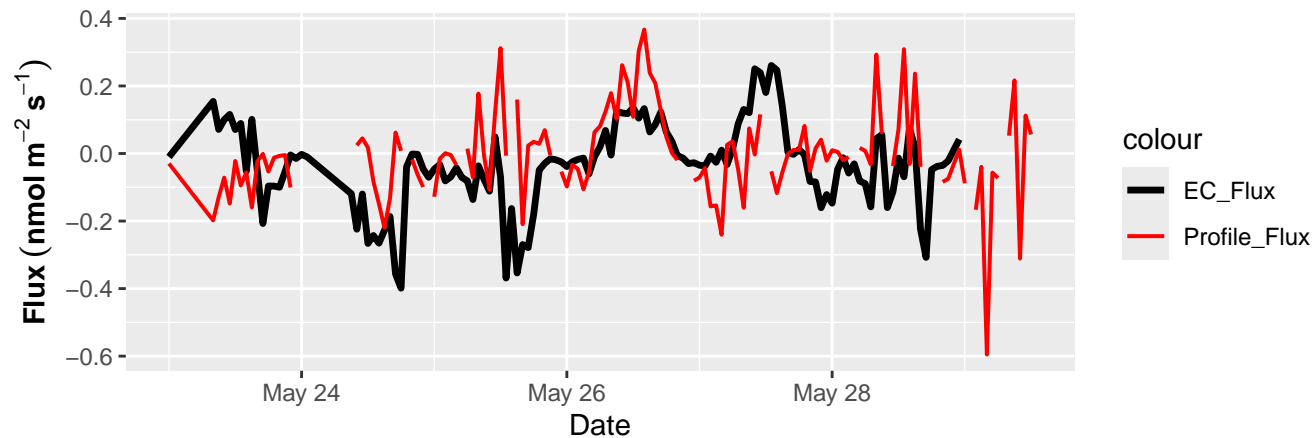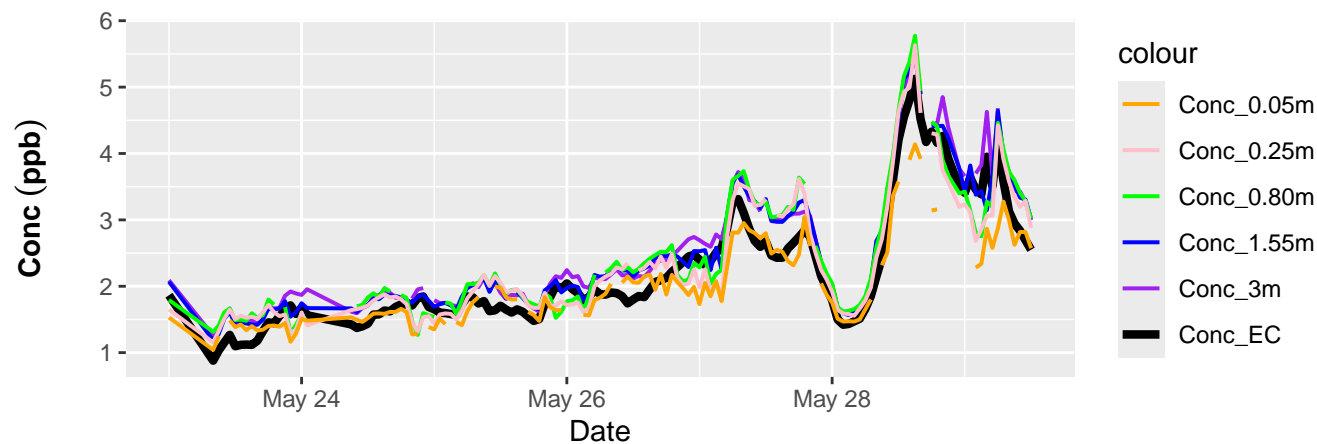

**m60.048**

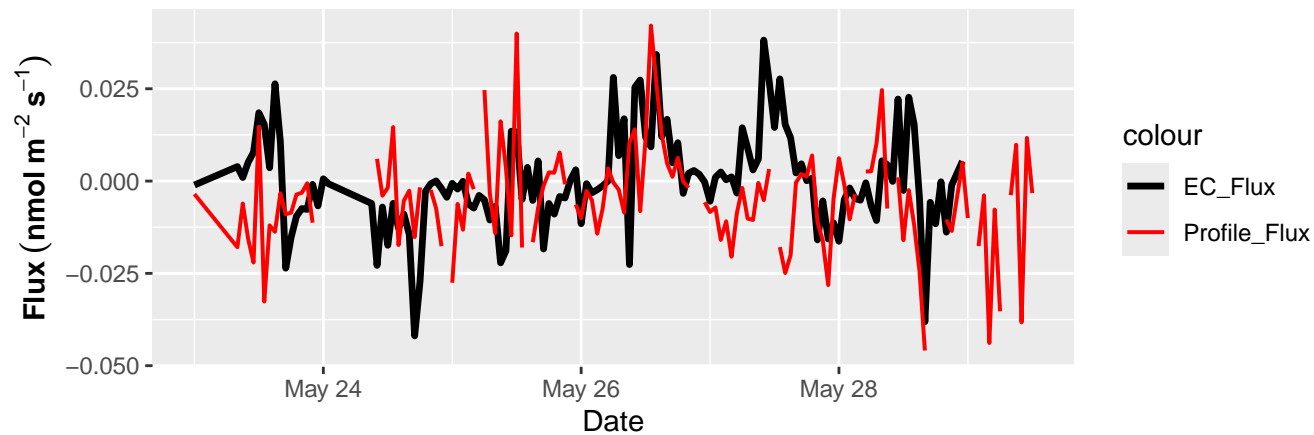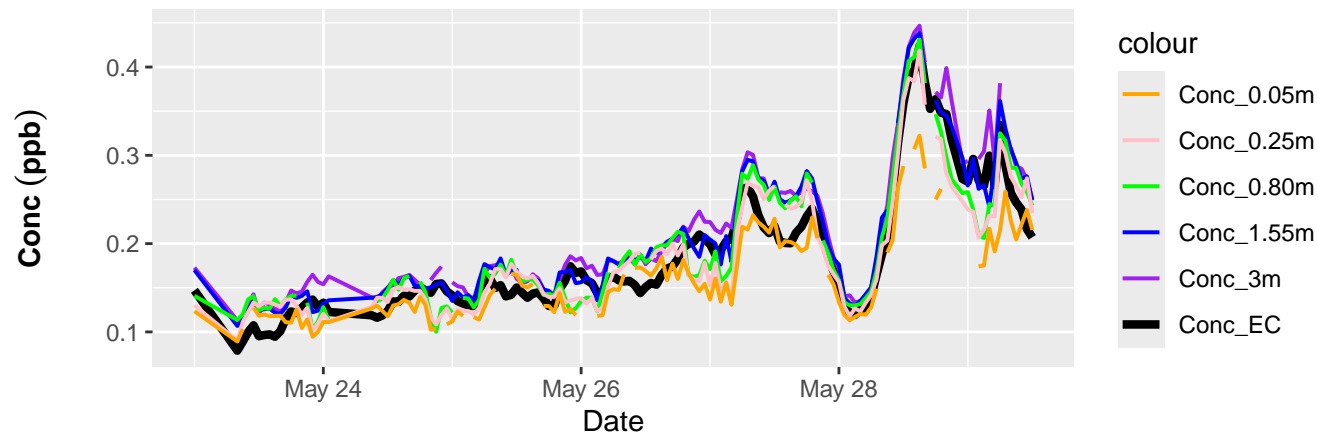

# m61.029

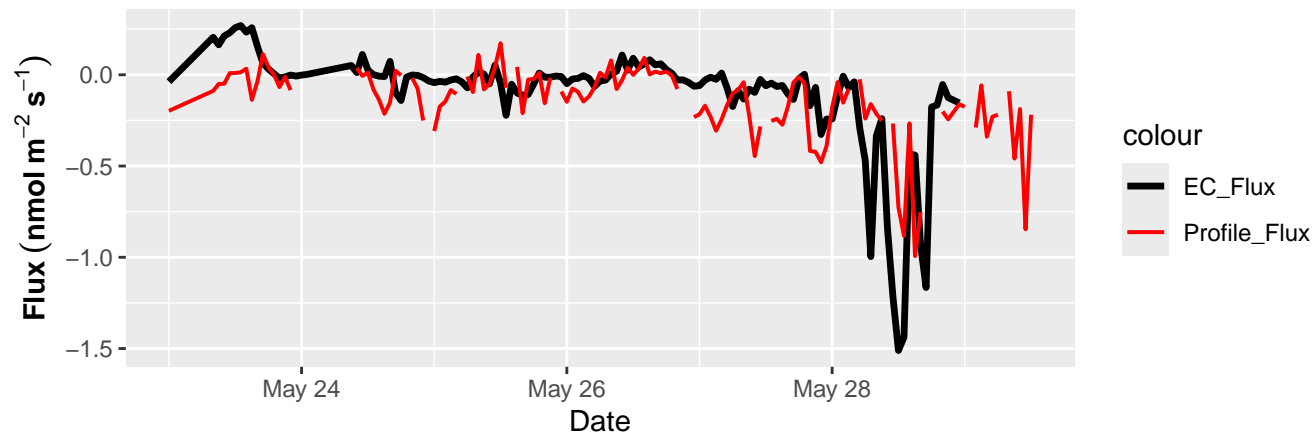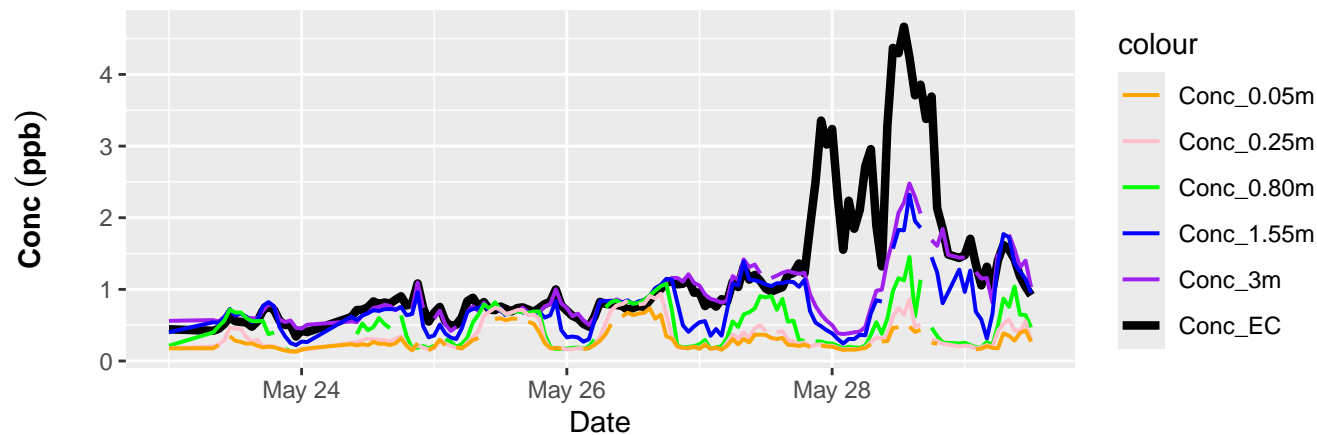

**m62.029**

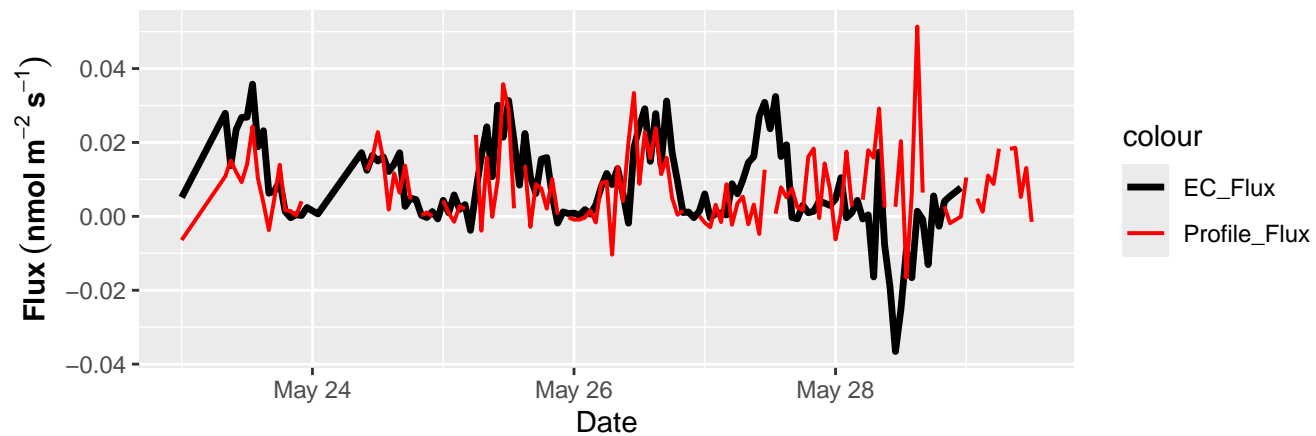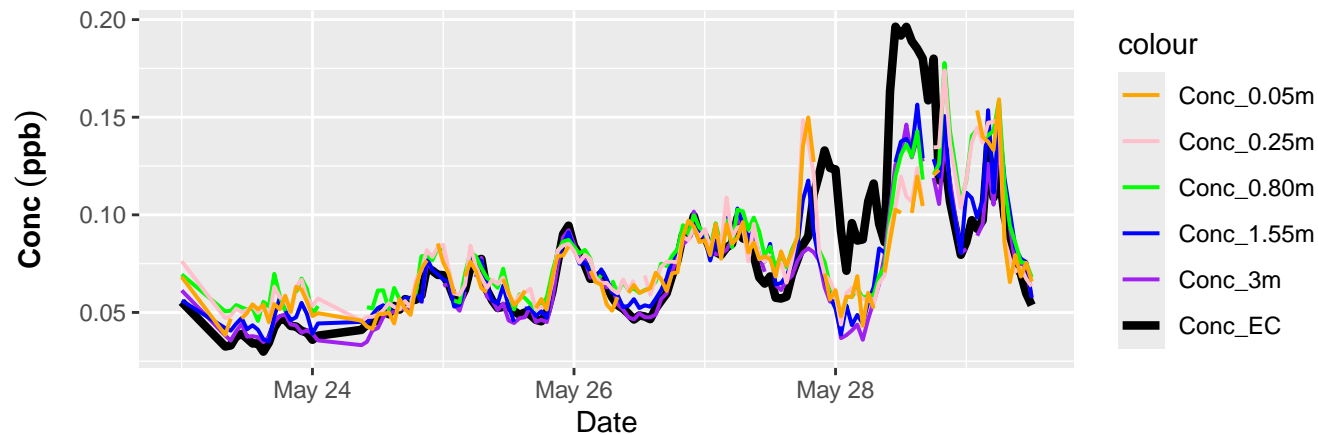

# m63.006

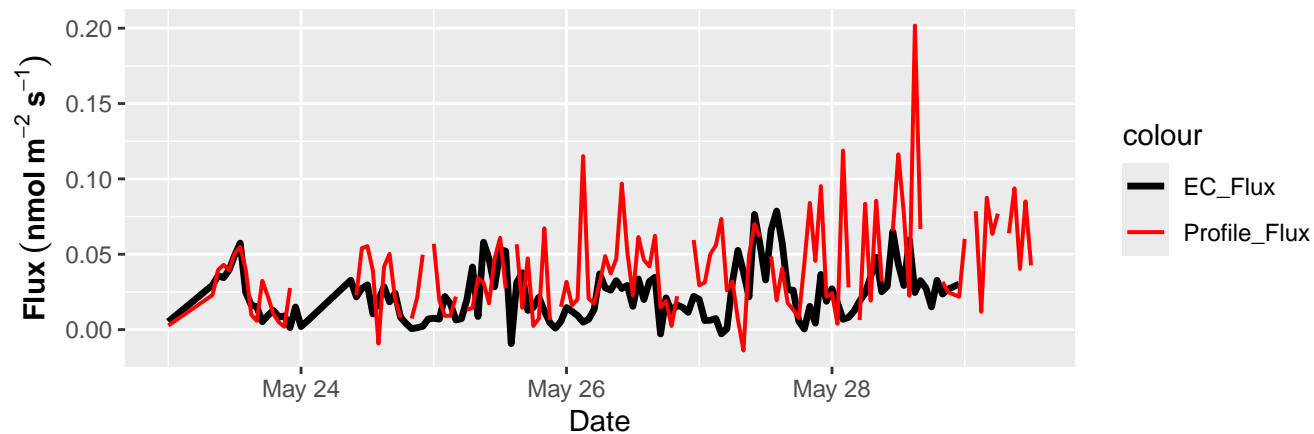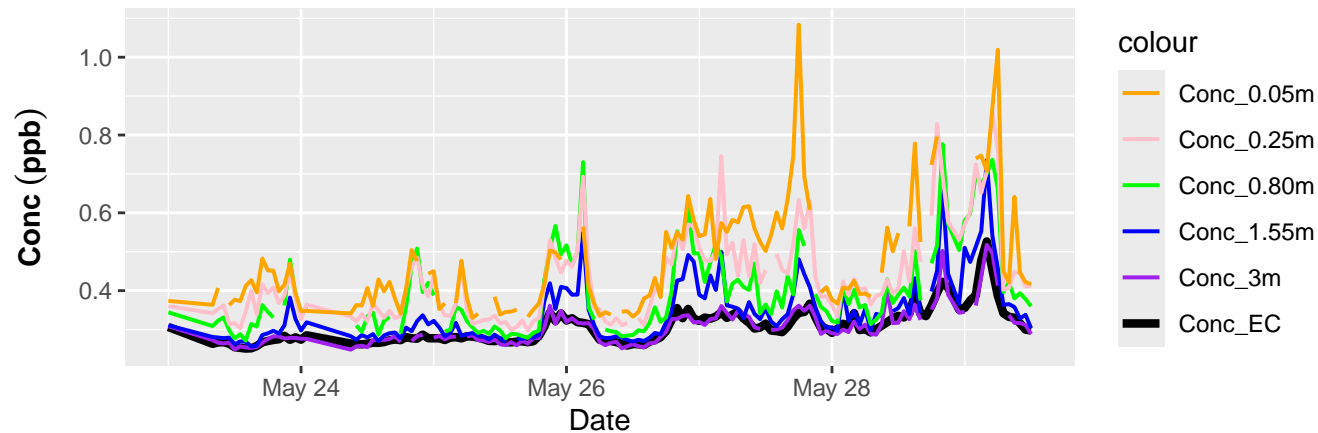

# m67.053

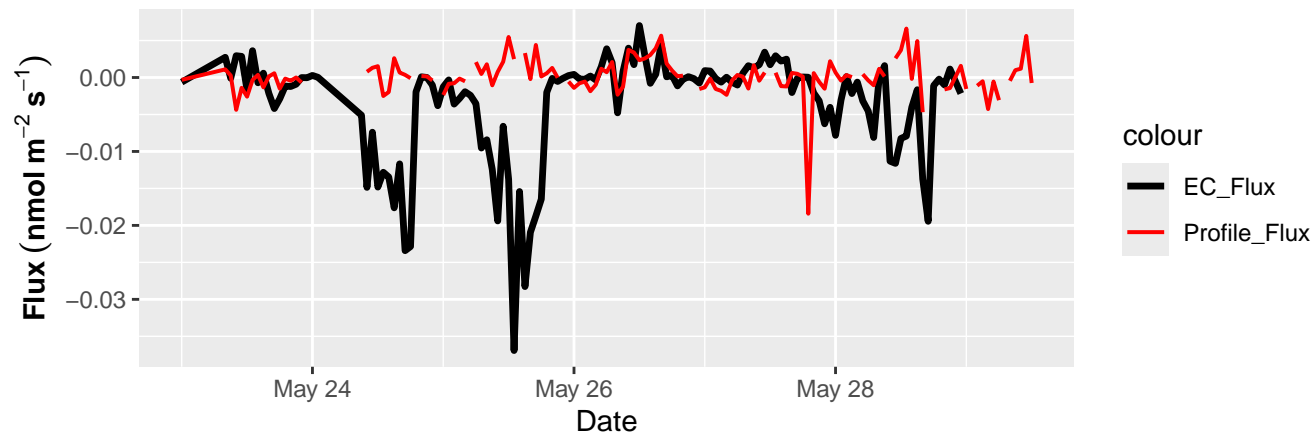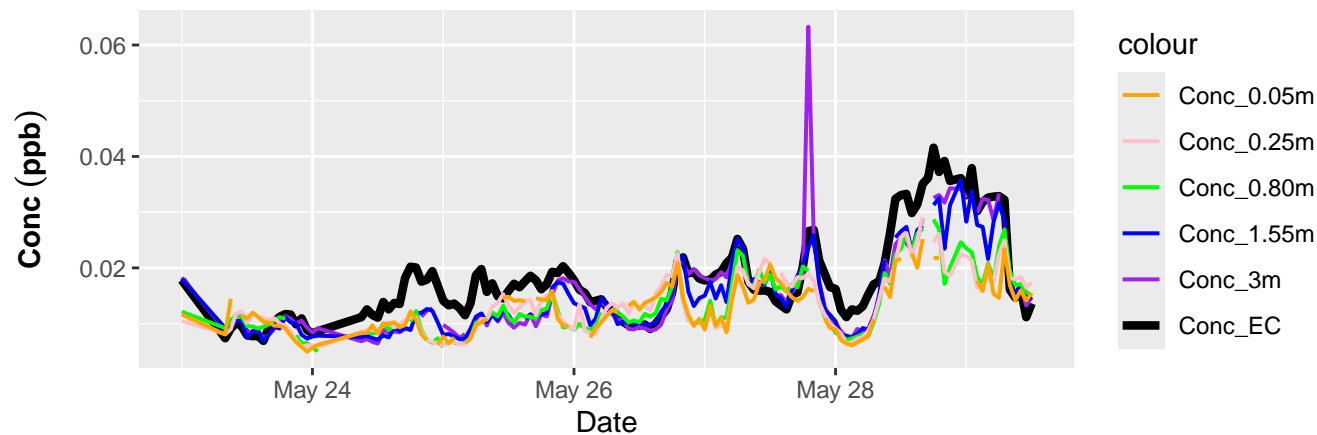

# m69.070

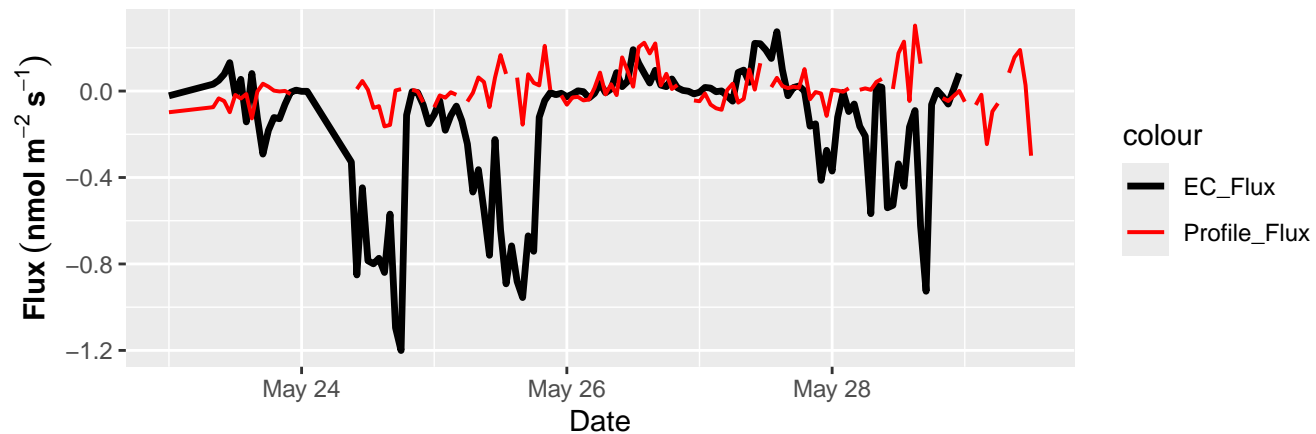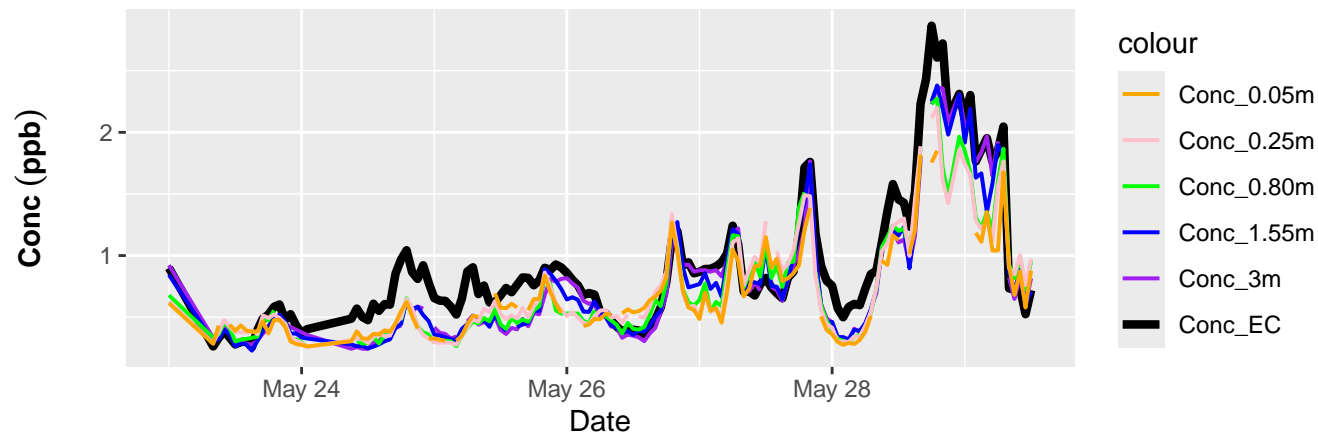



**m73.064**

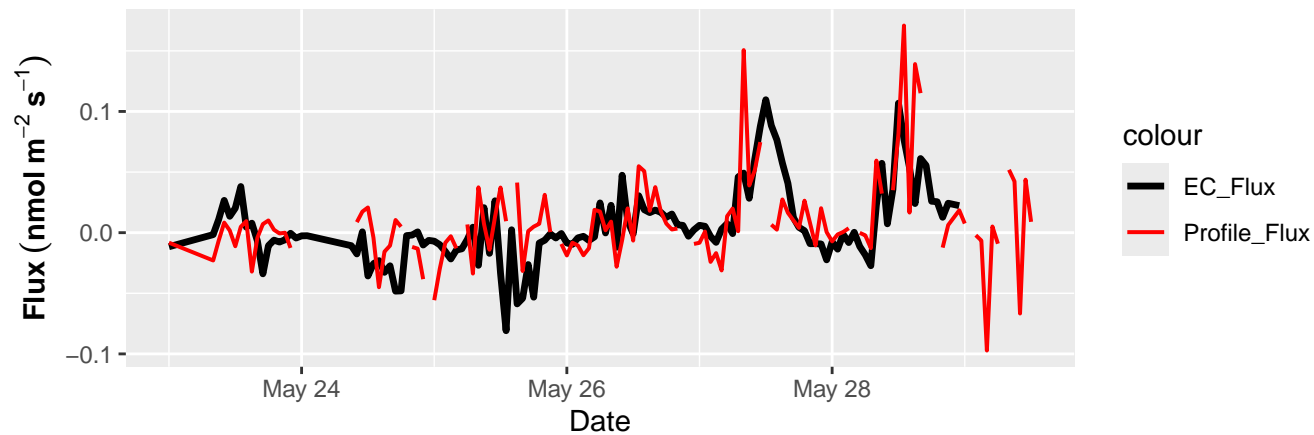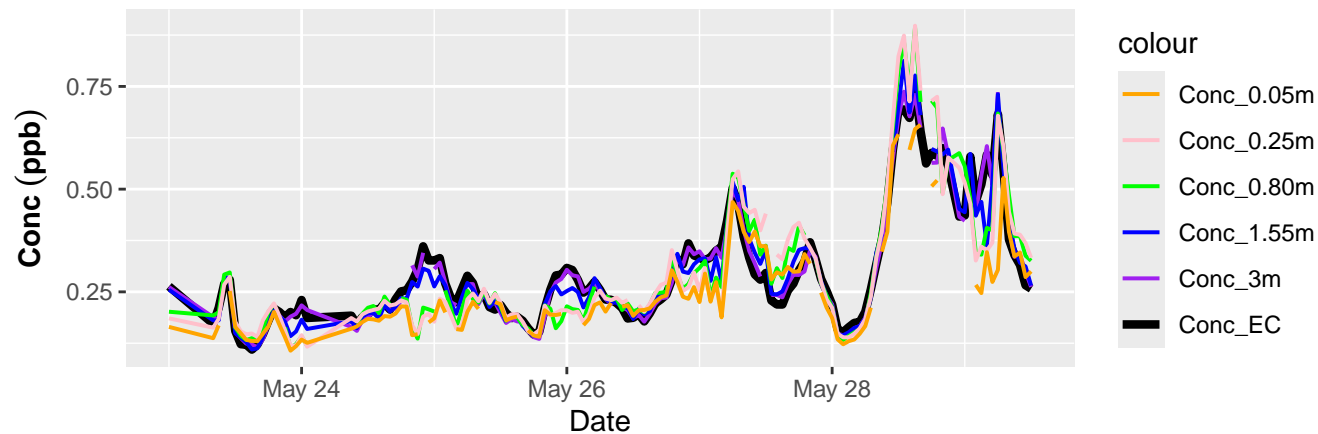

**m75.025**

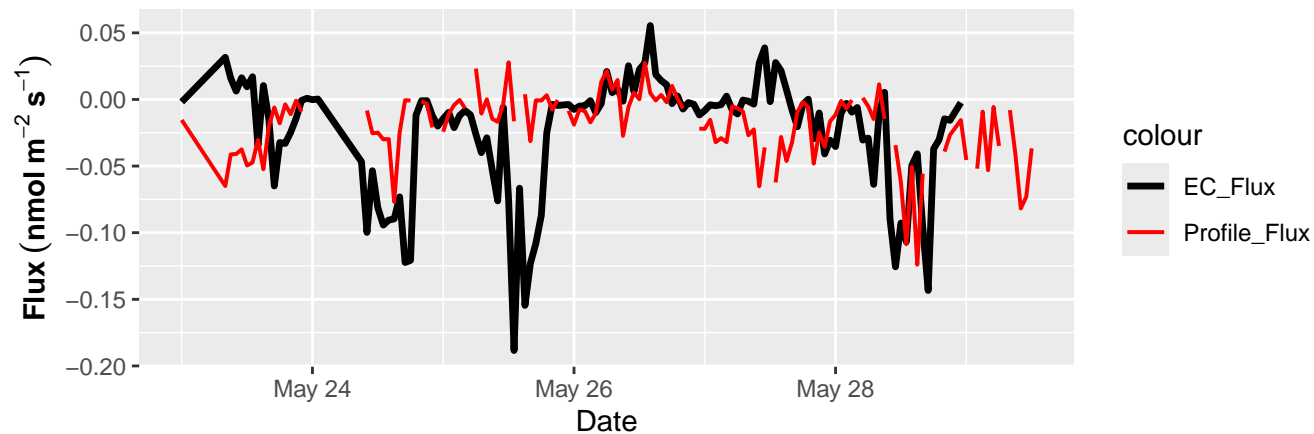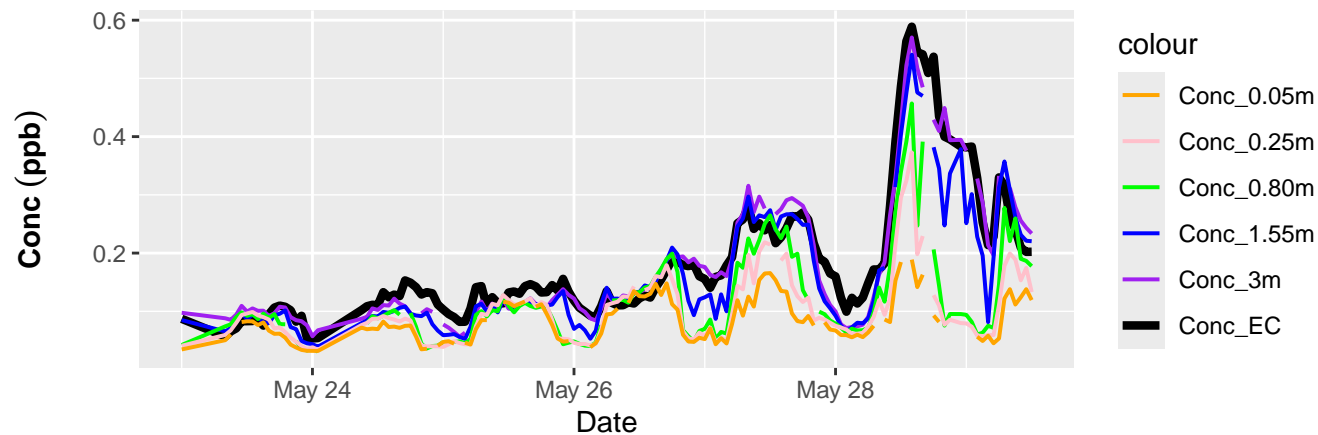

**m77.005**

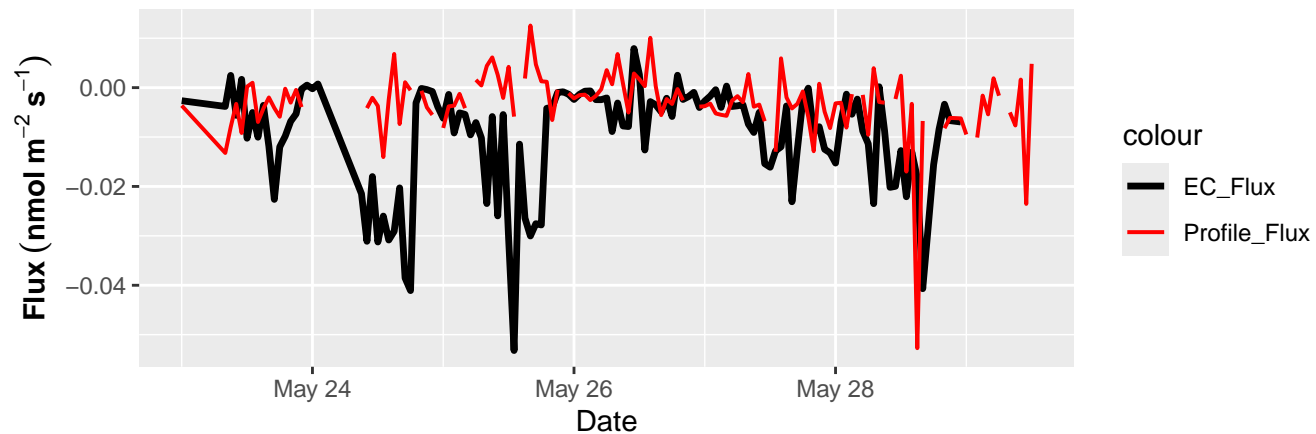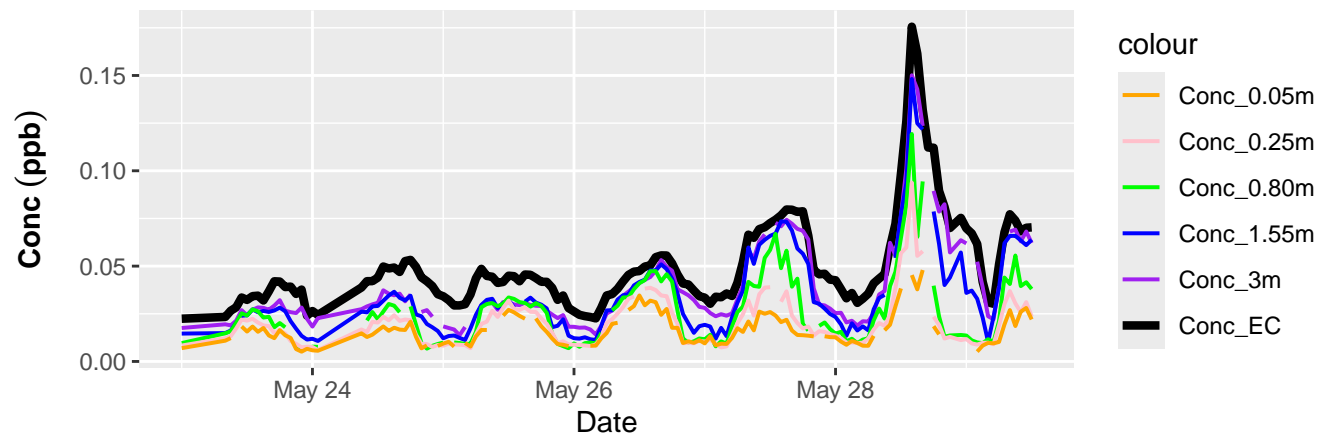

m82.074

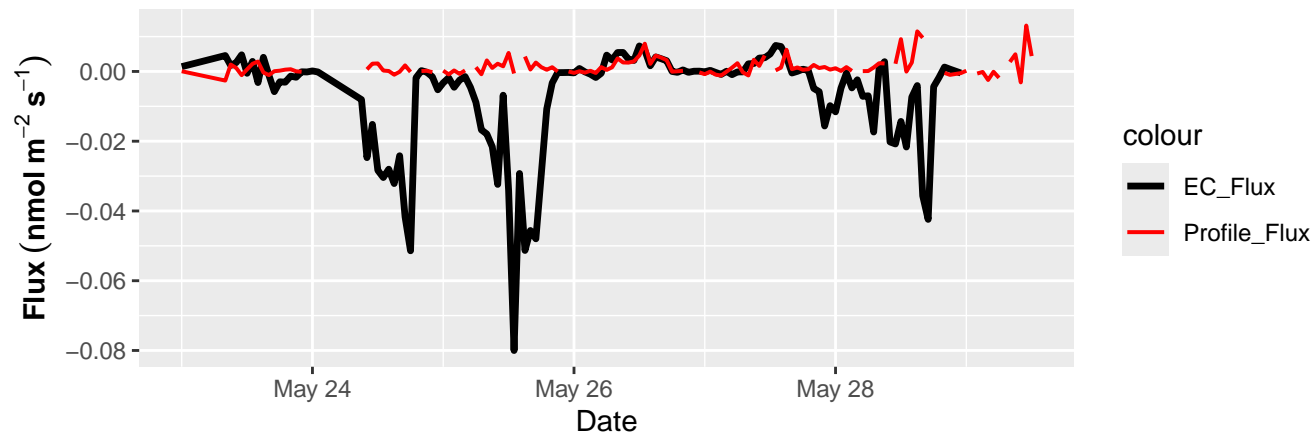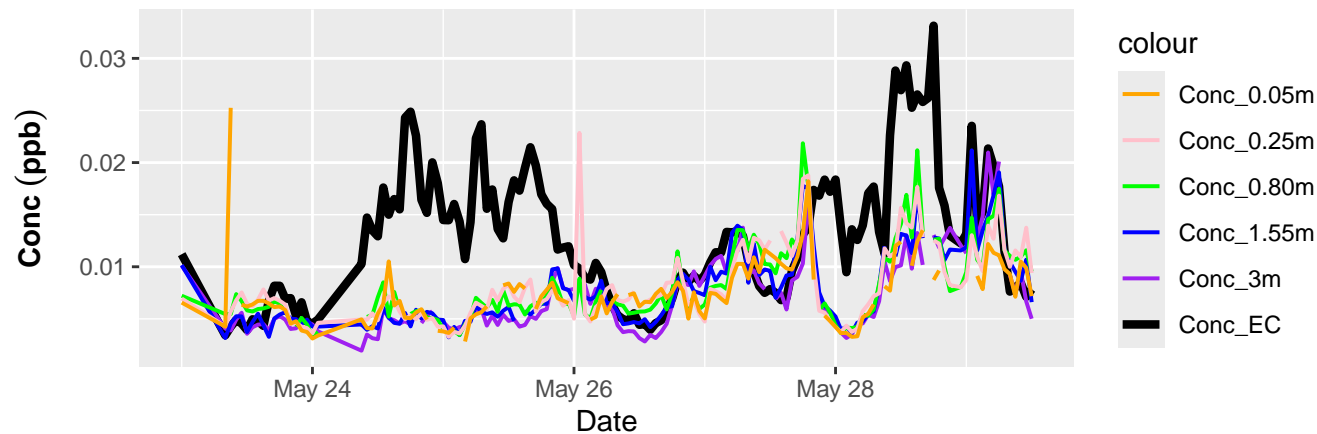

**m83.049**

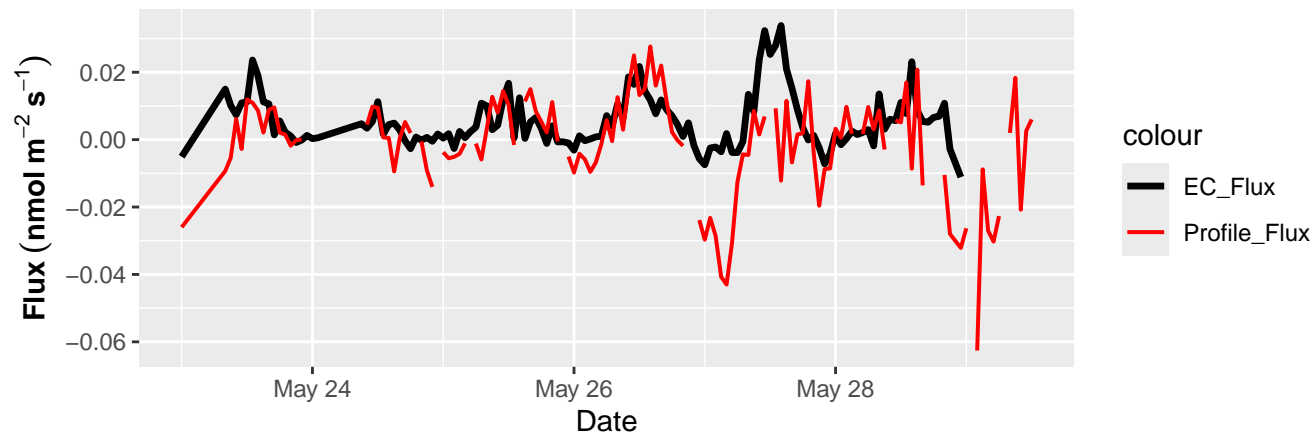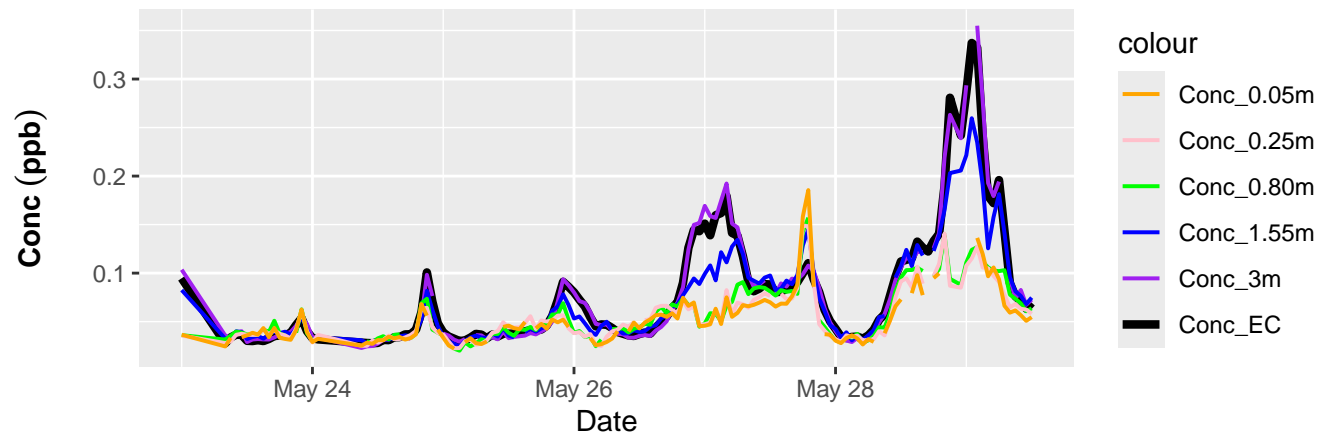

m83.084

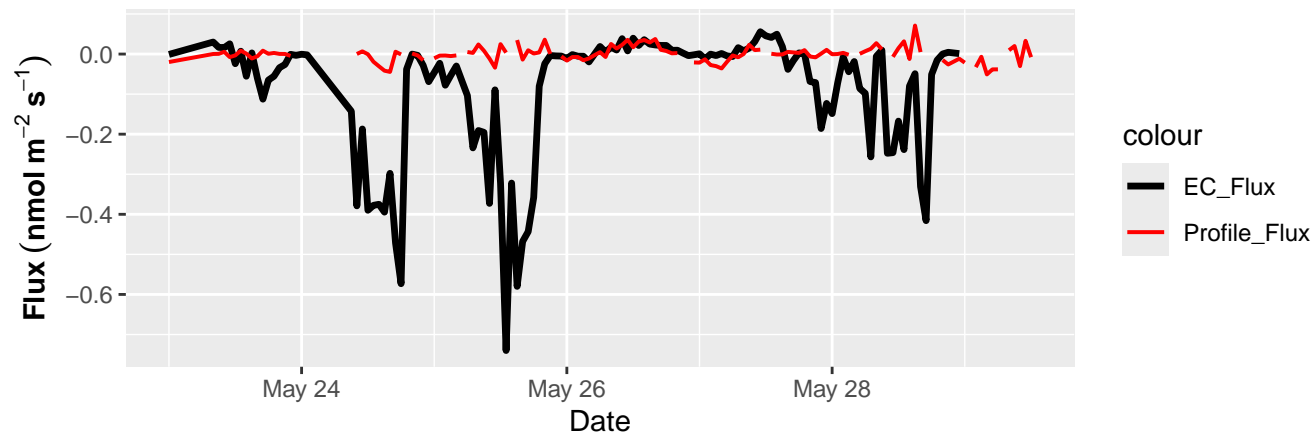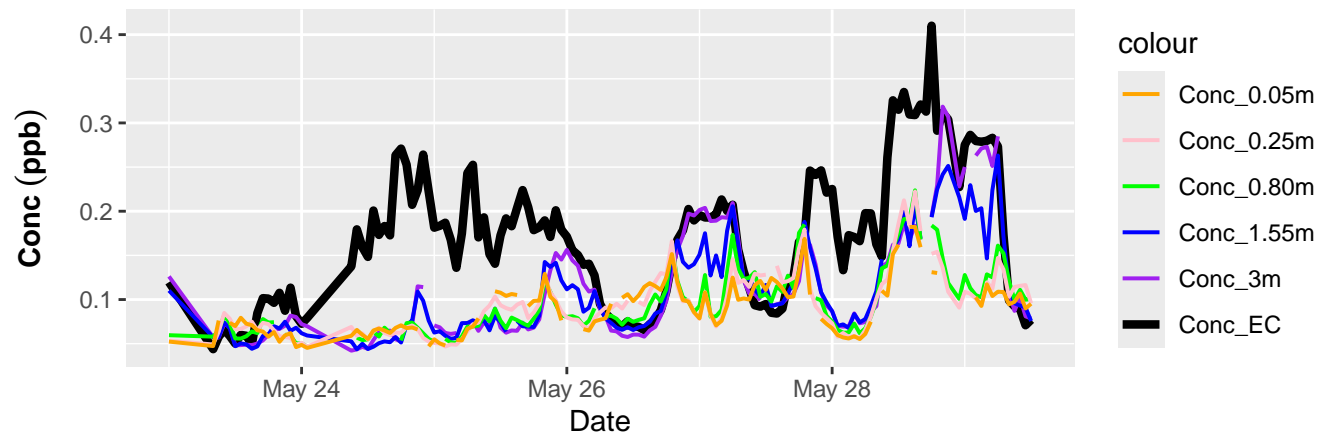

# m87.042

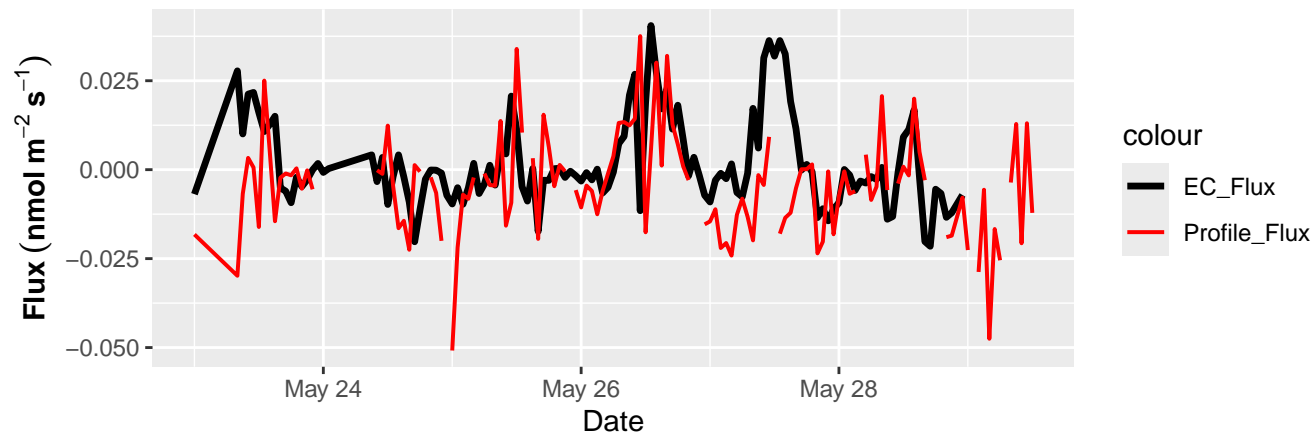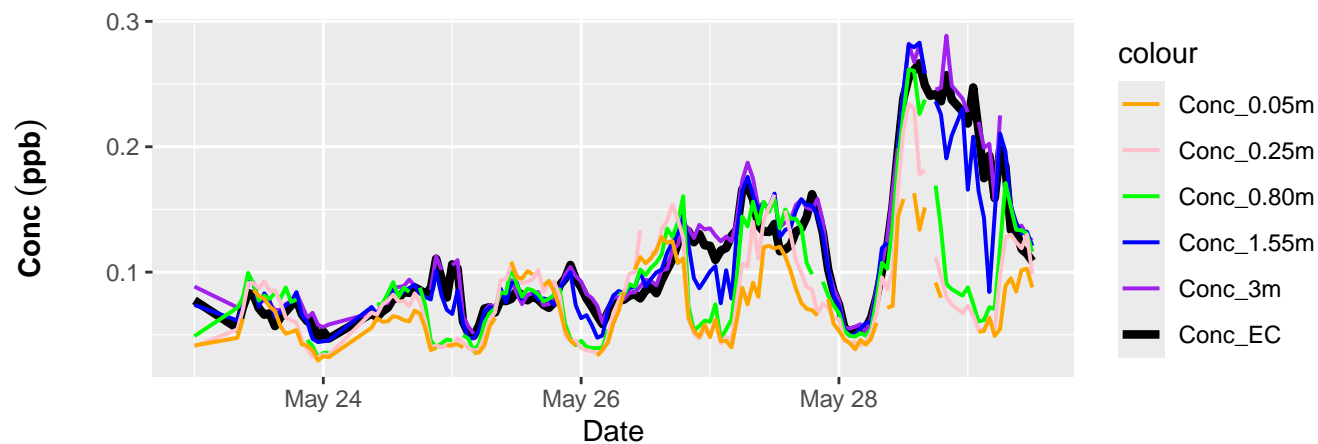

**m87.078**

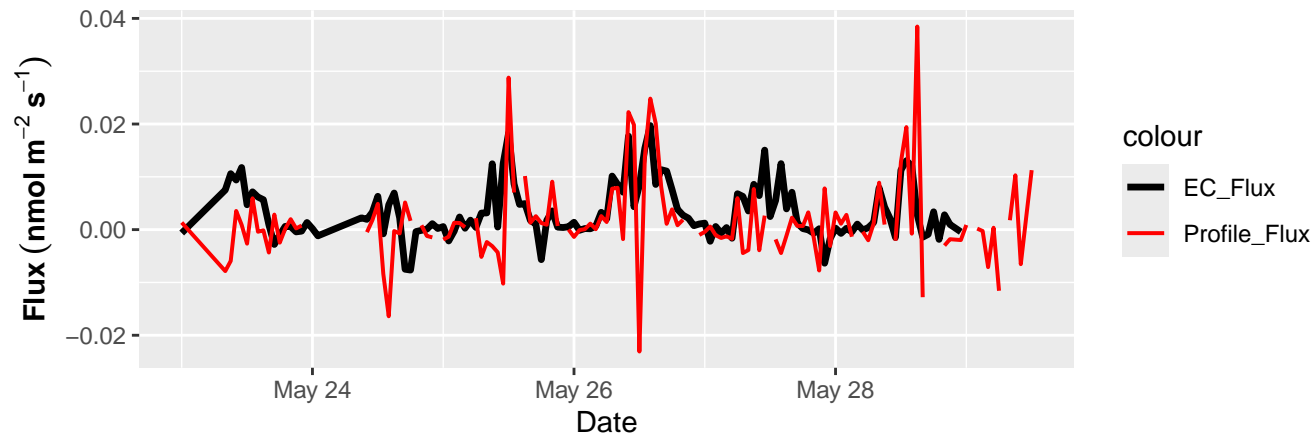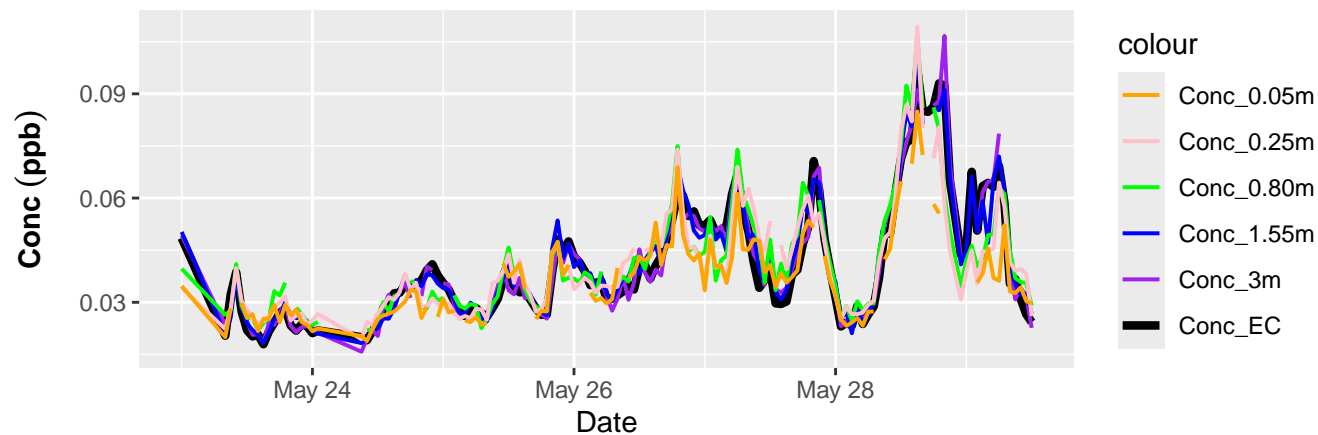



# m93.035

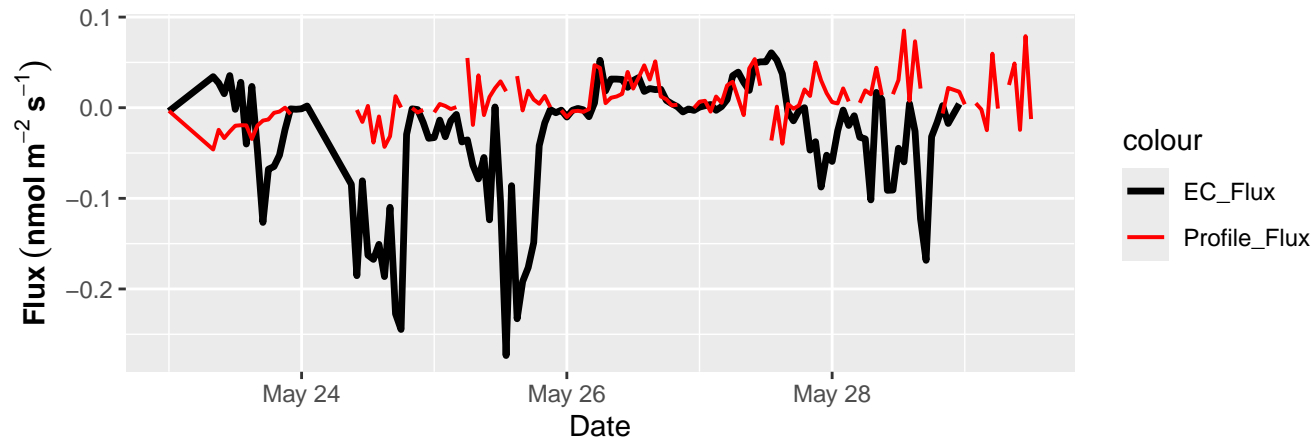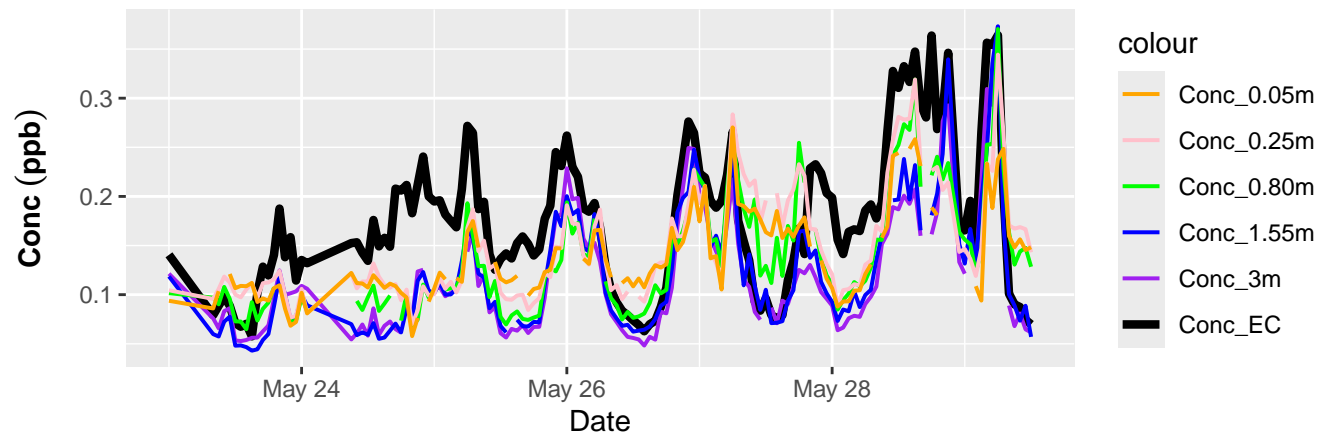

# m95.015

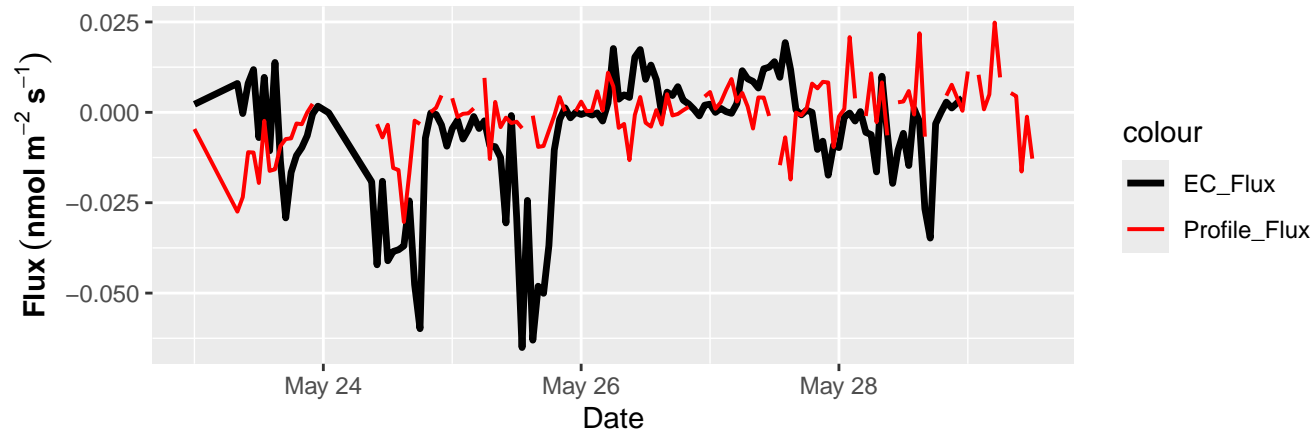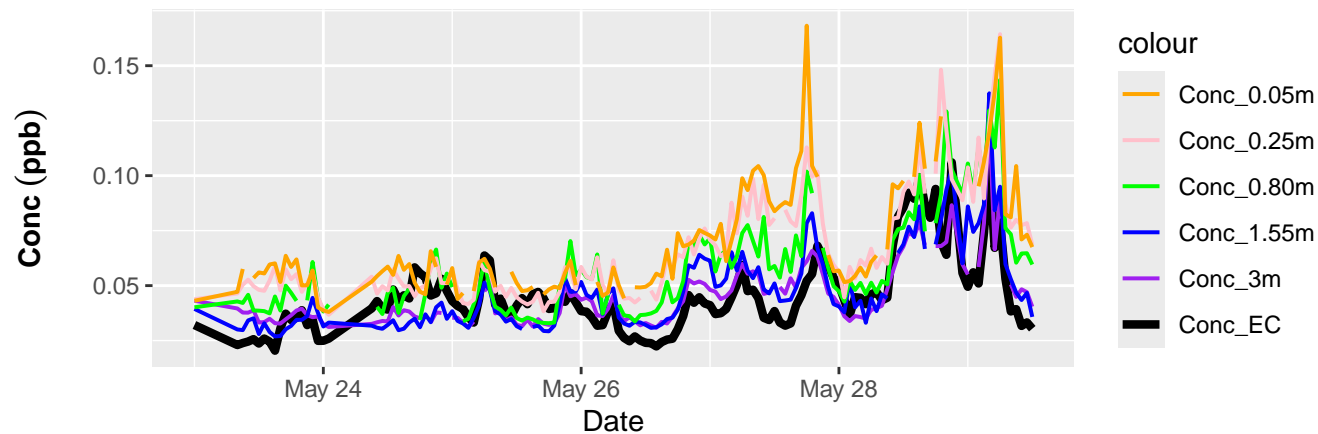

m95.083

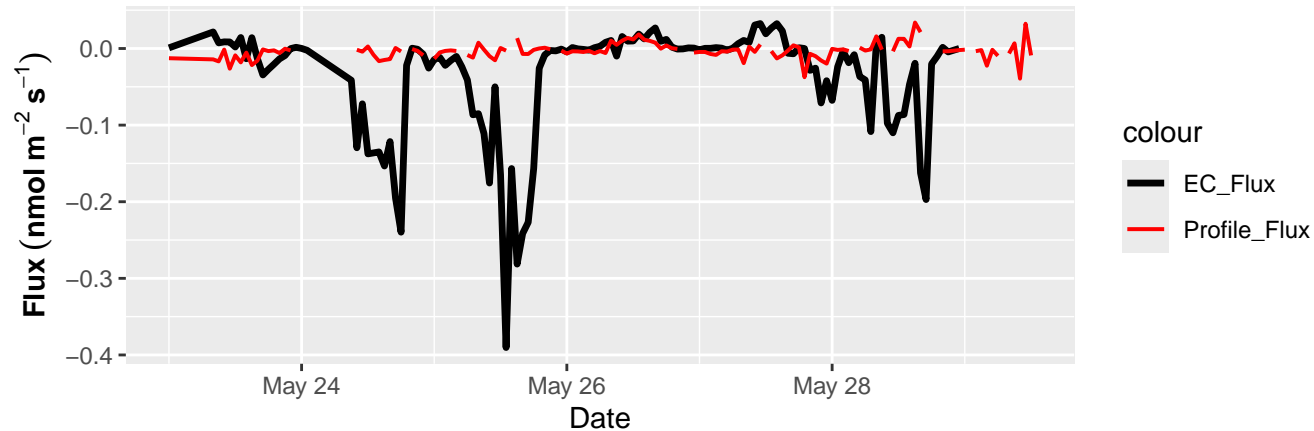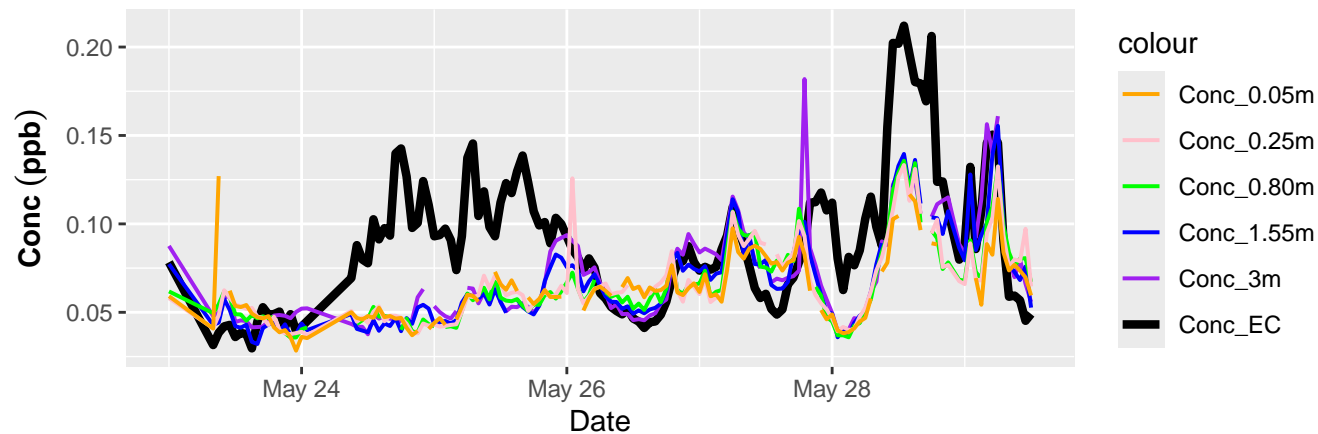

m99.008

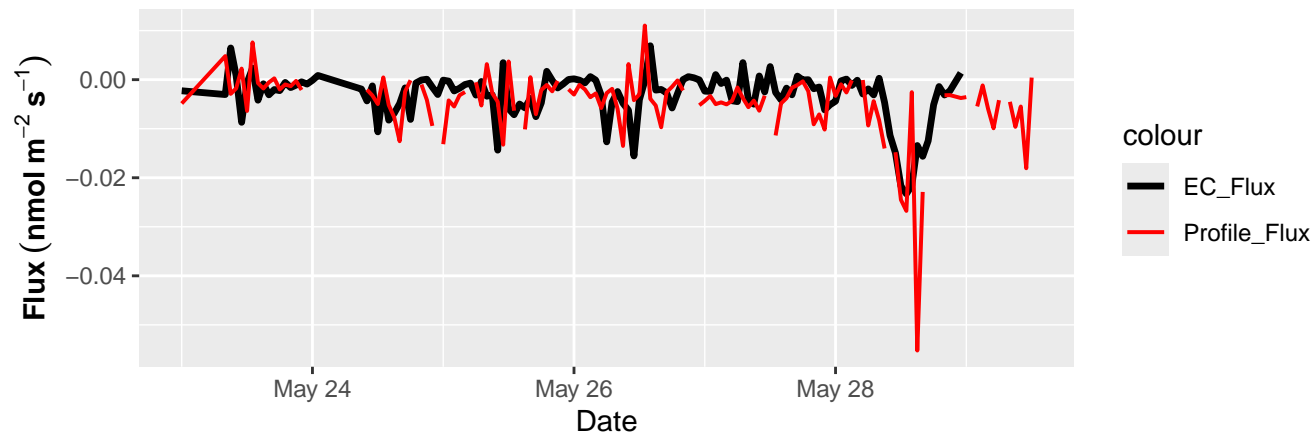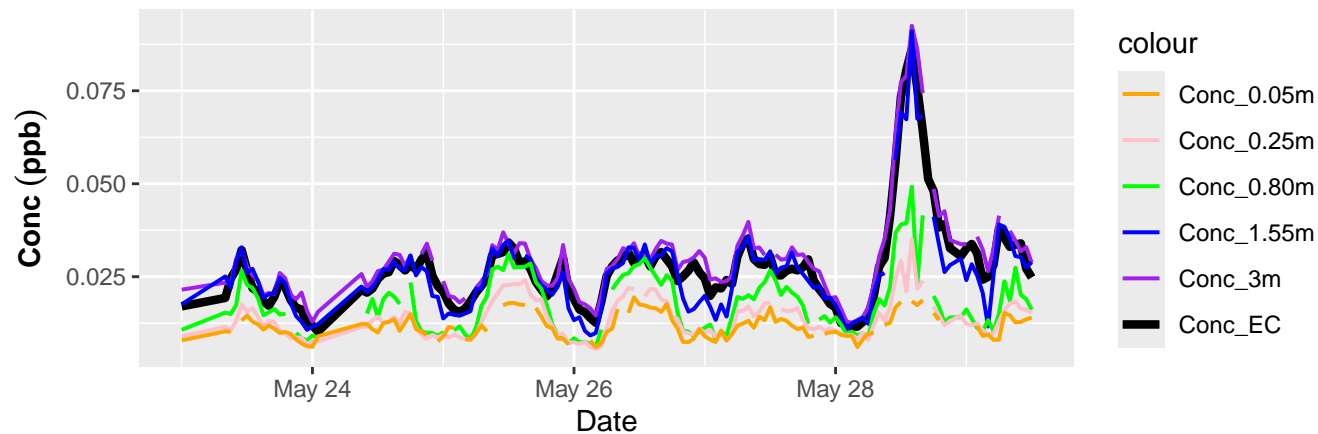

# m101.059

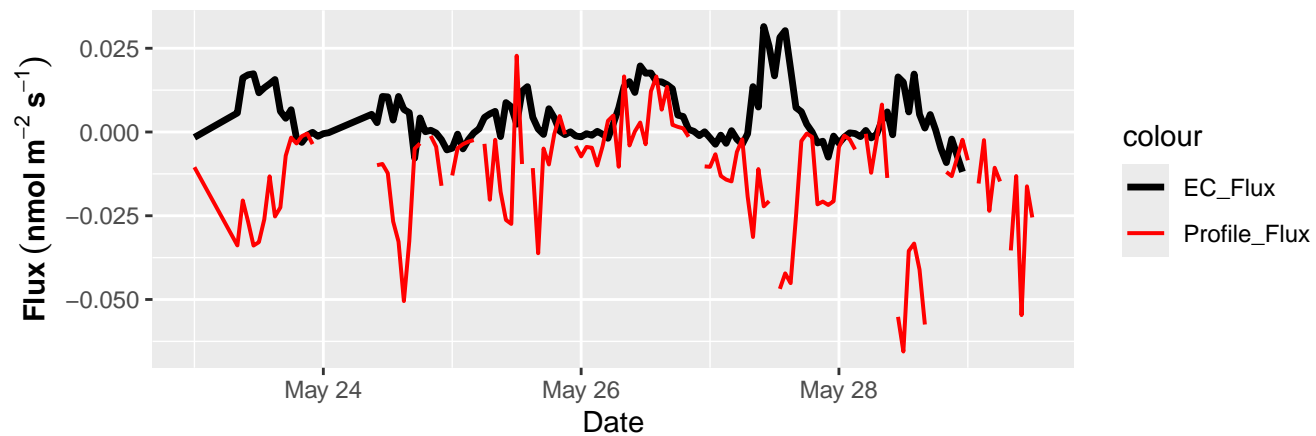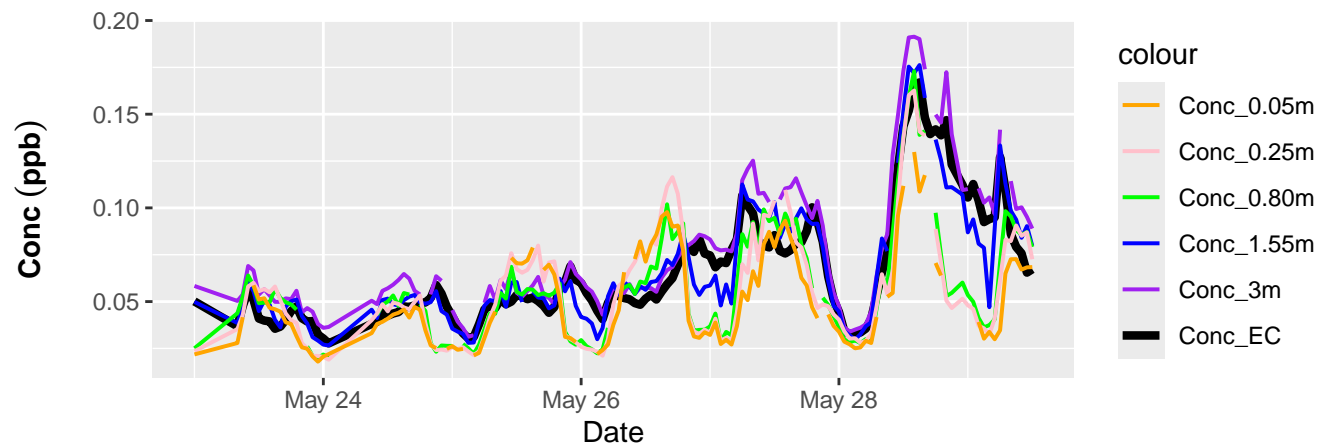

# m103.074

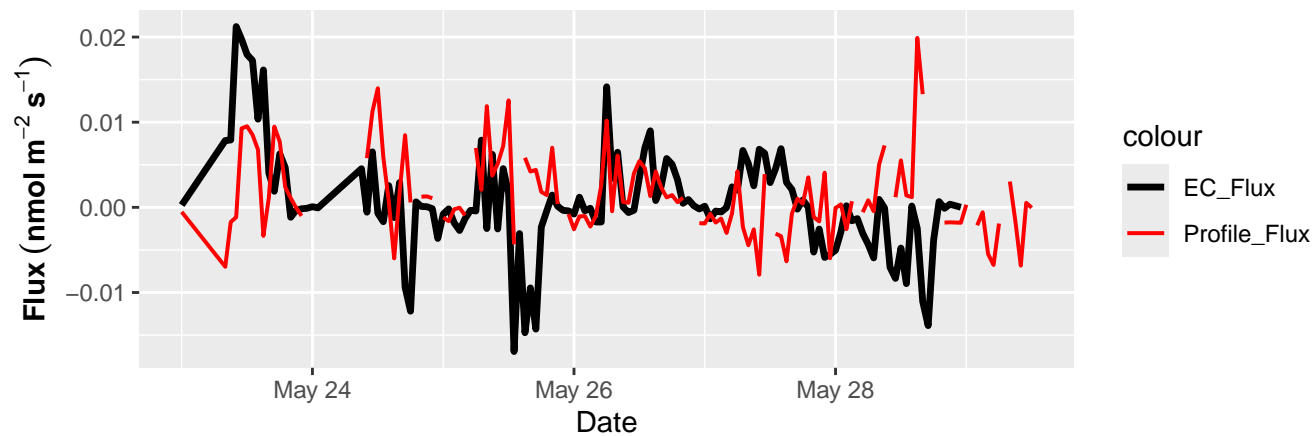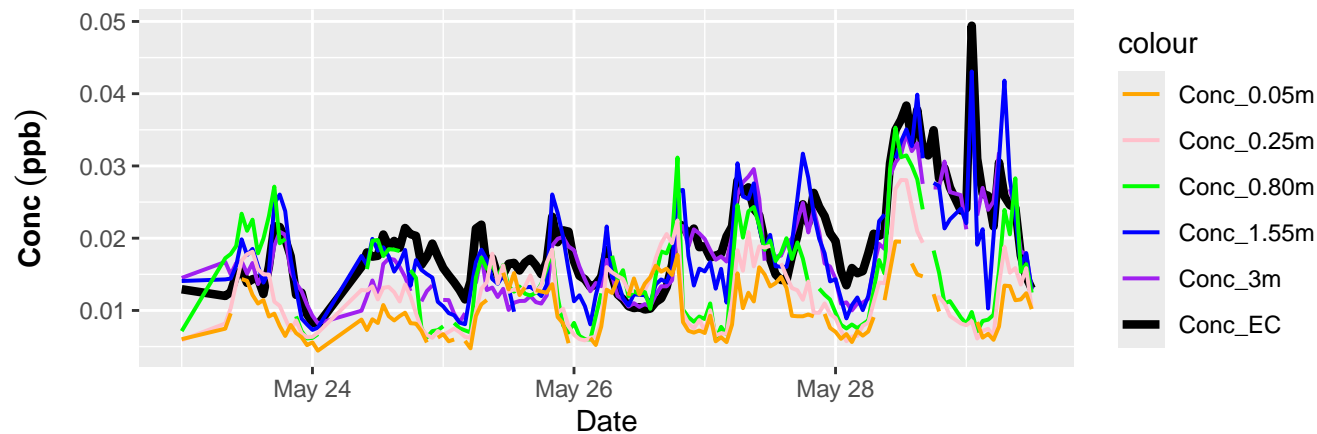

# m105.066

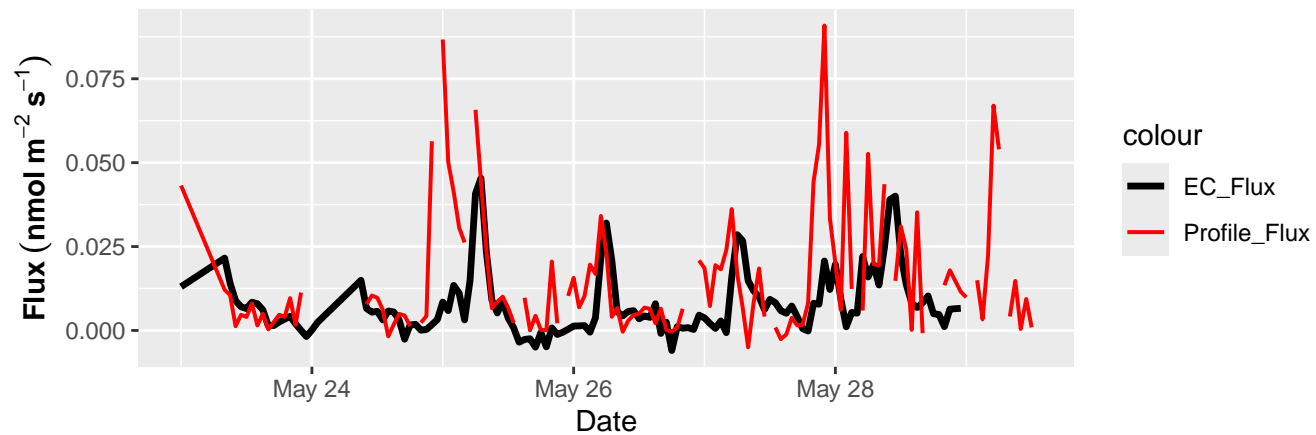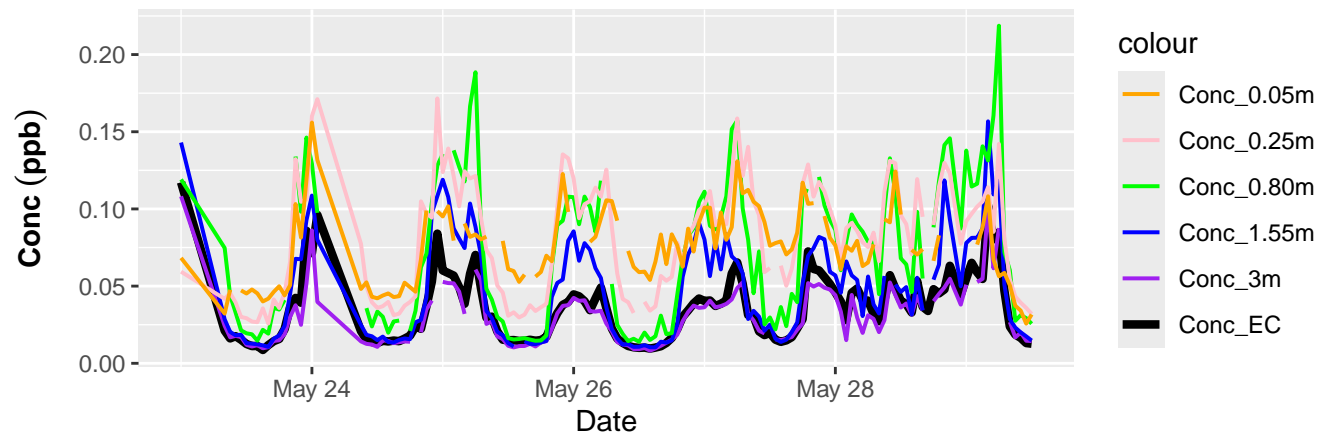

# m109.100

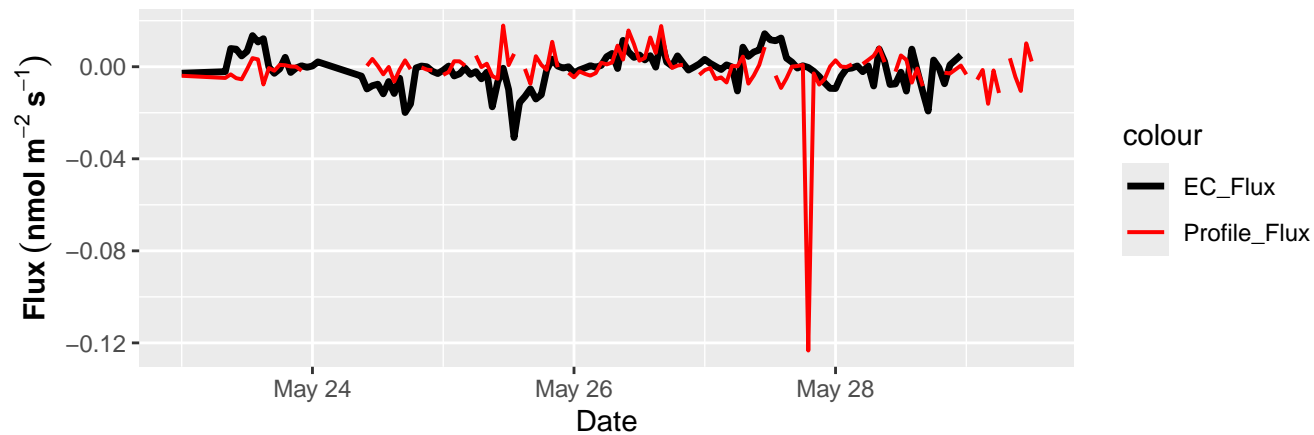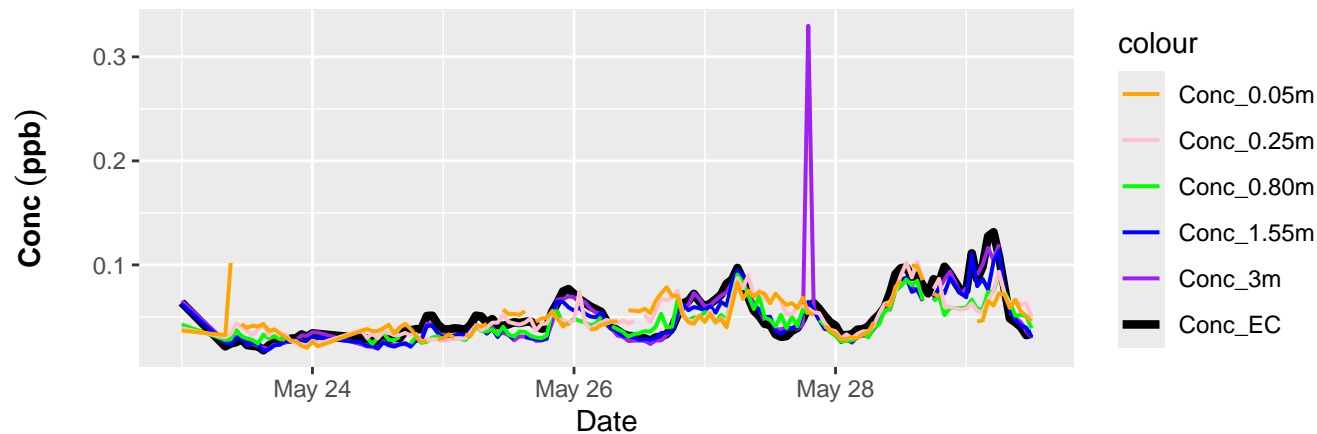



# m115.078

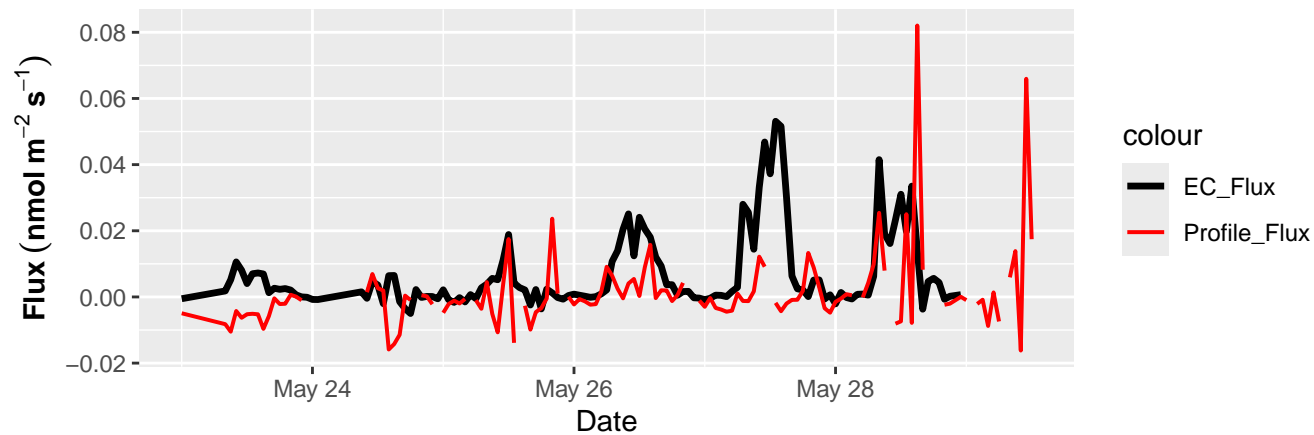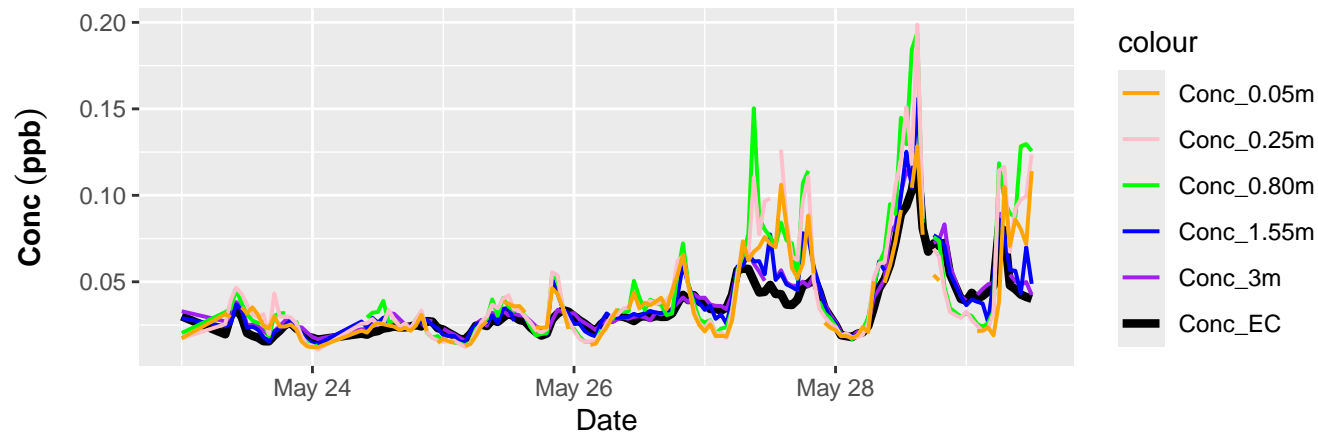

# m118.074

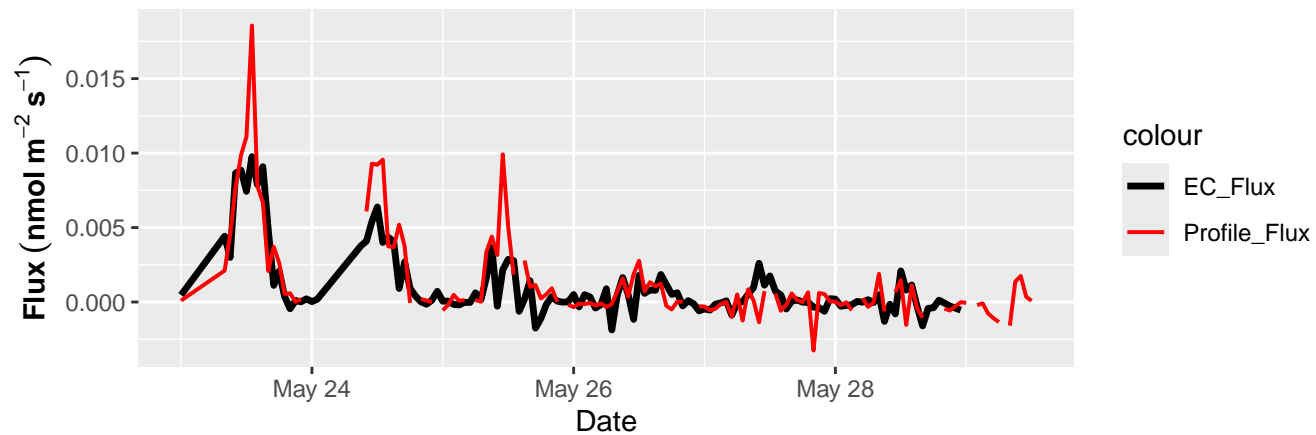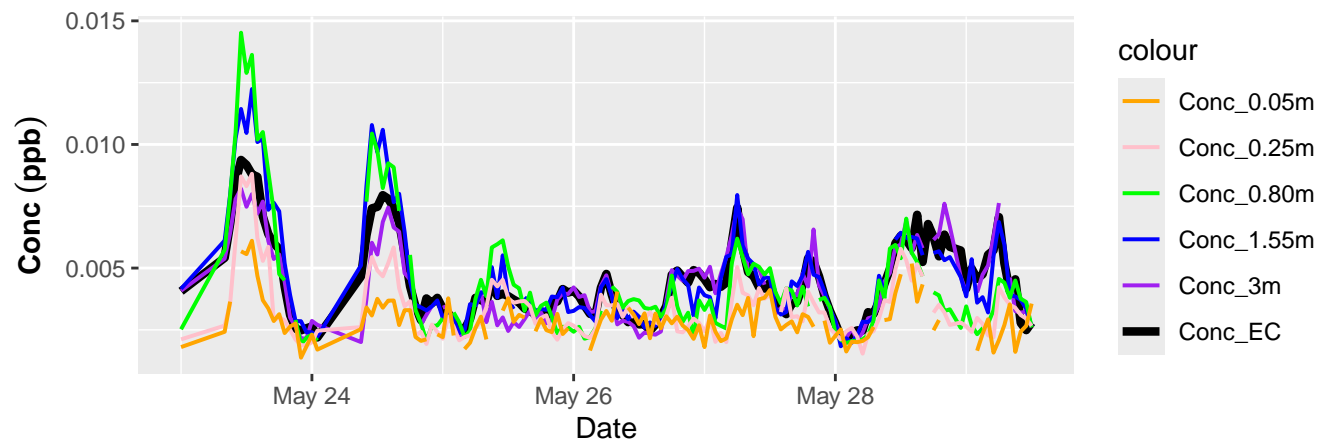

# m121.098

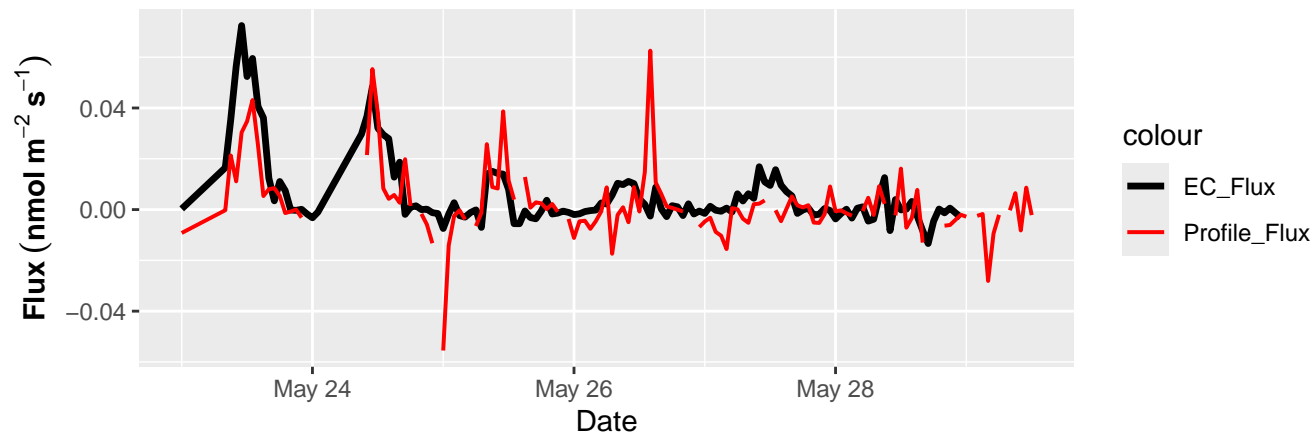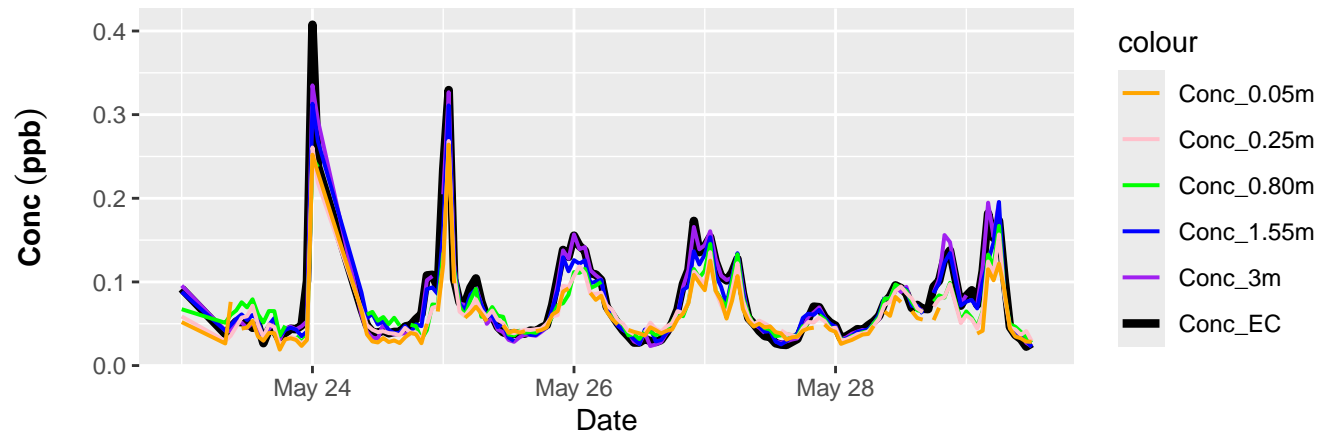

m137.129

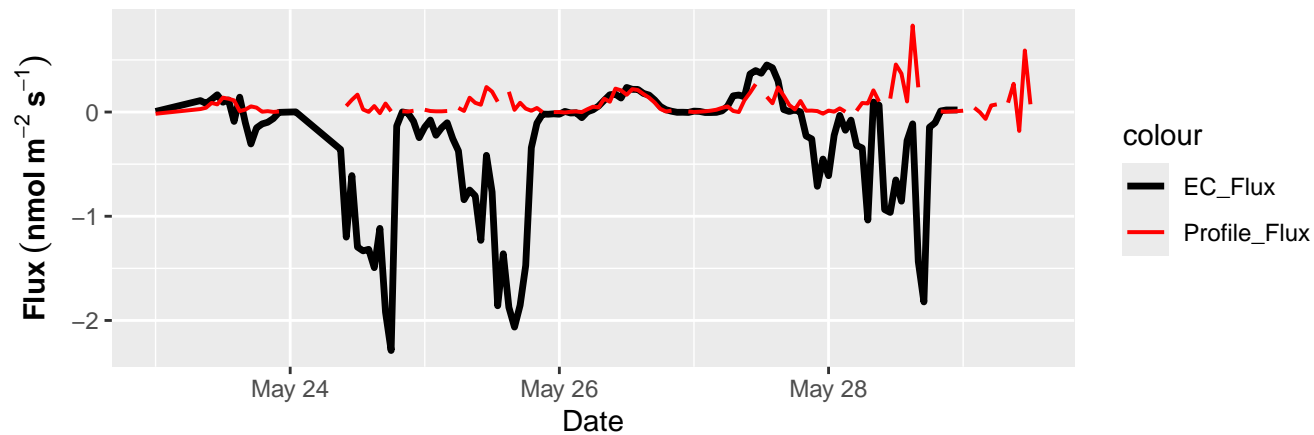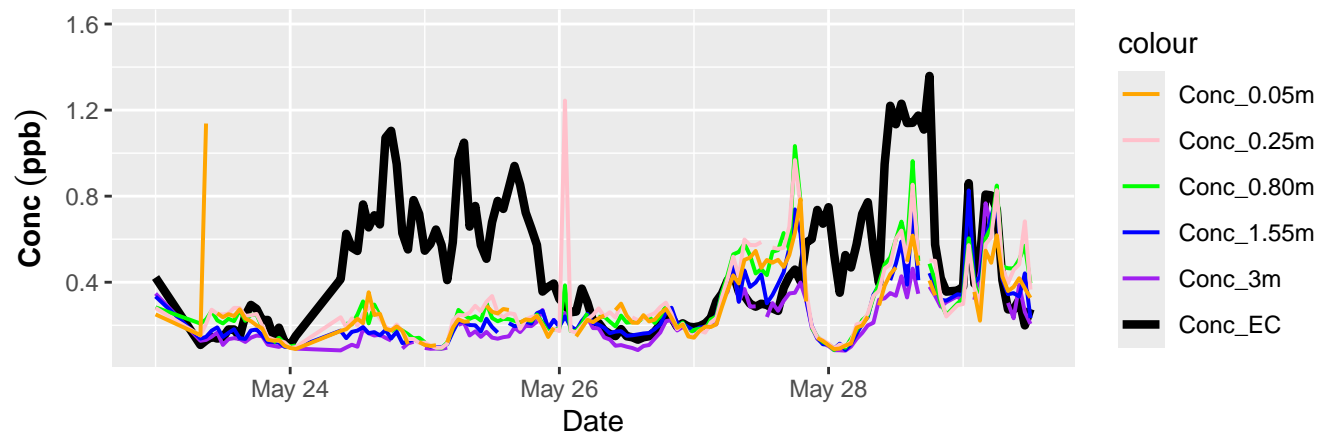

**m167.052**

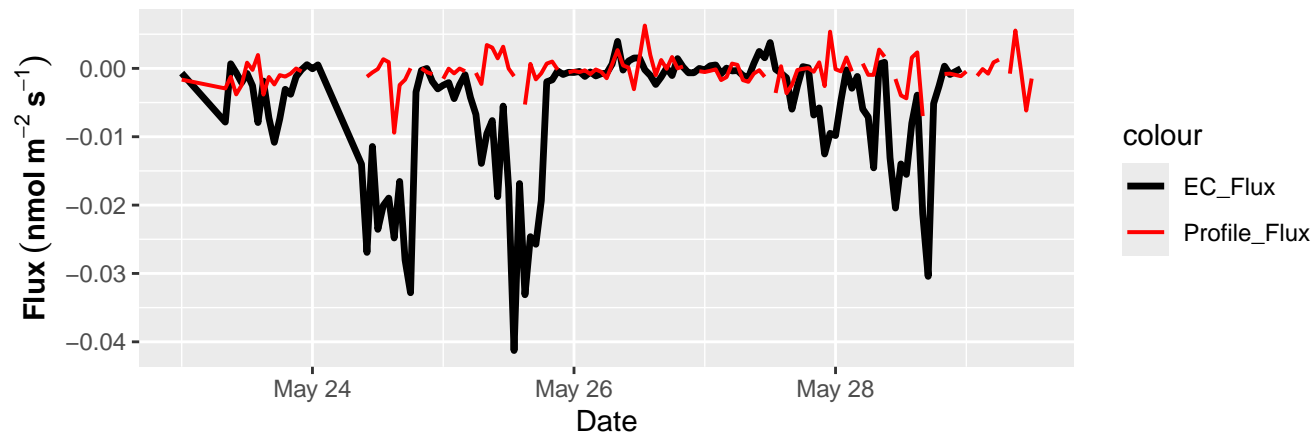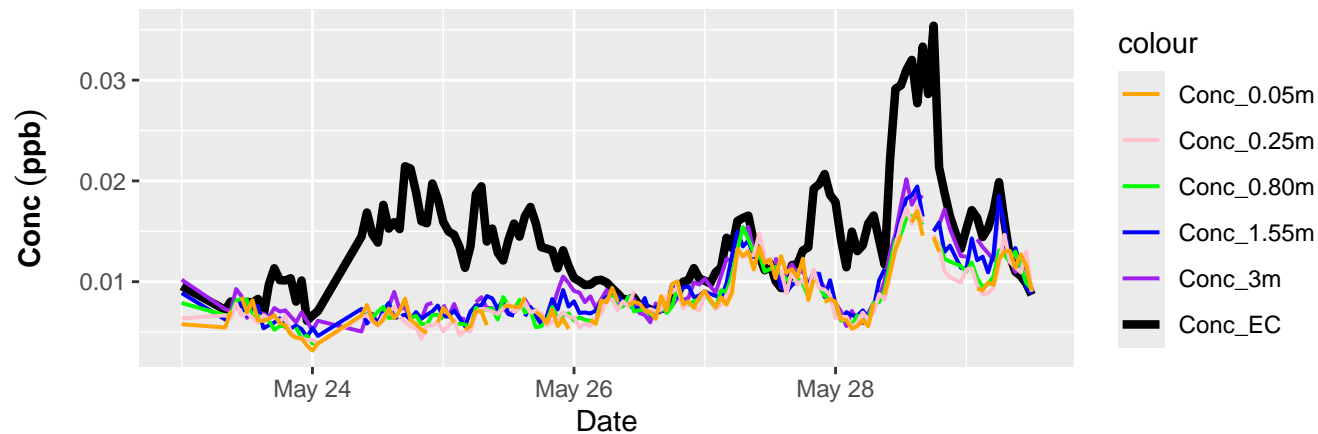

# m205.186

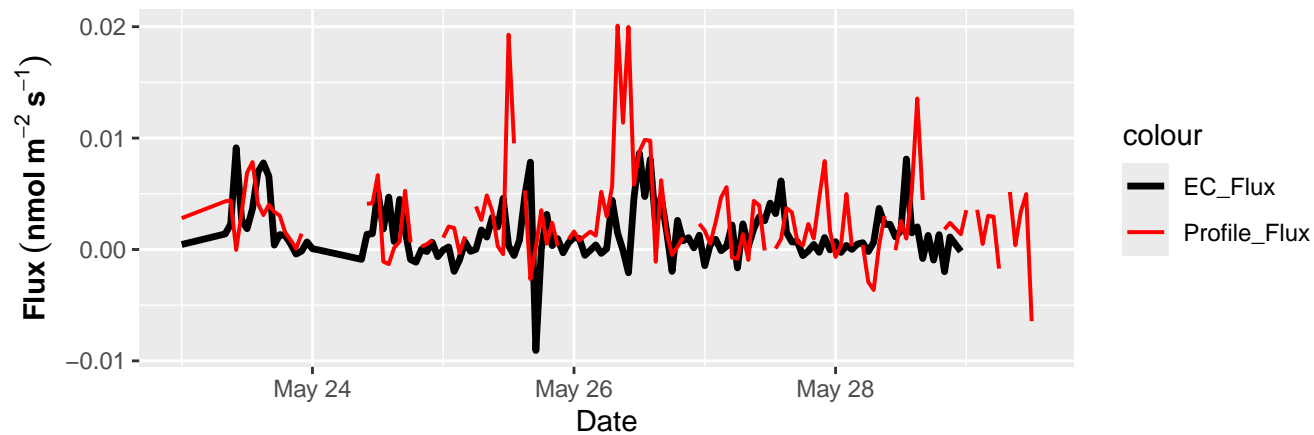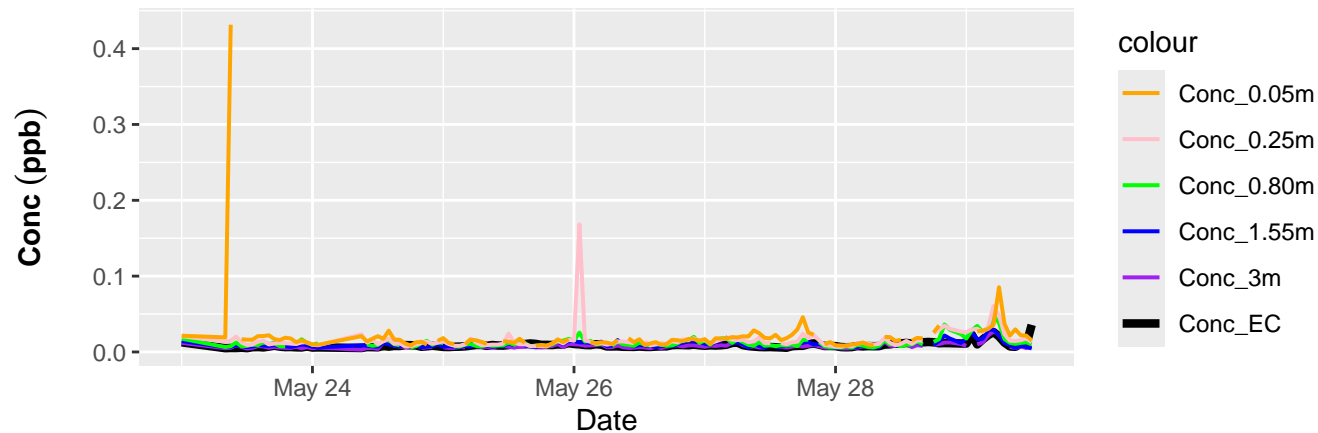

m223.057

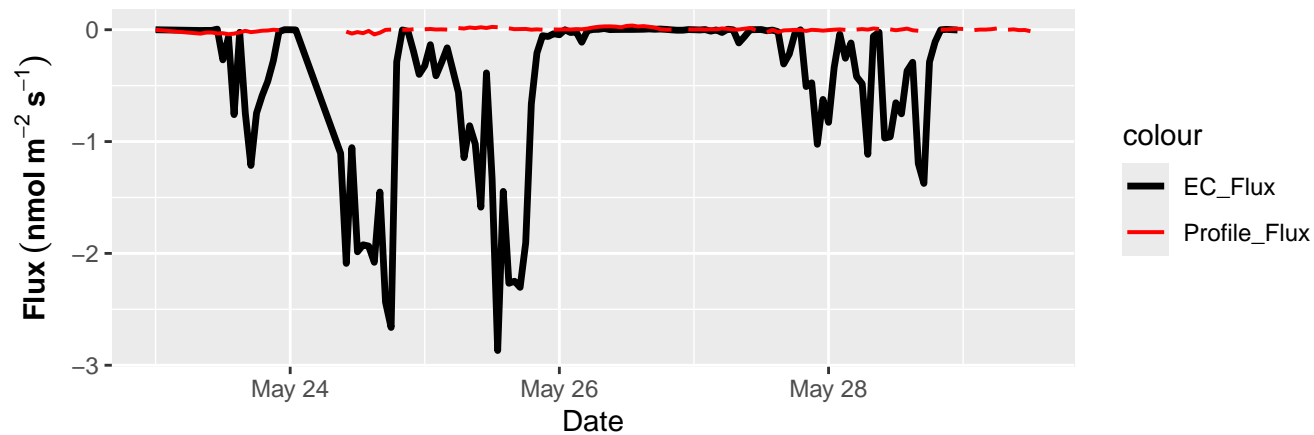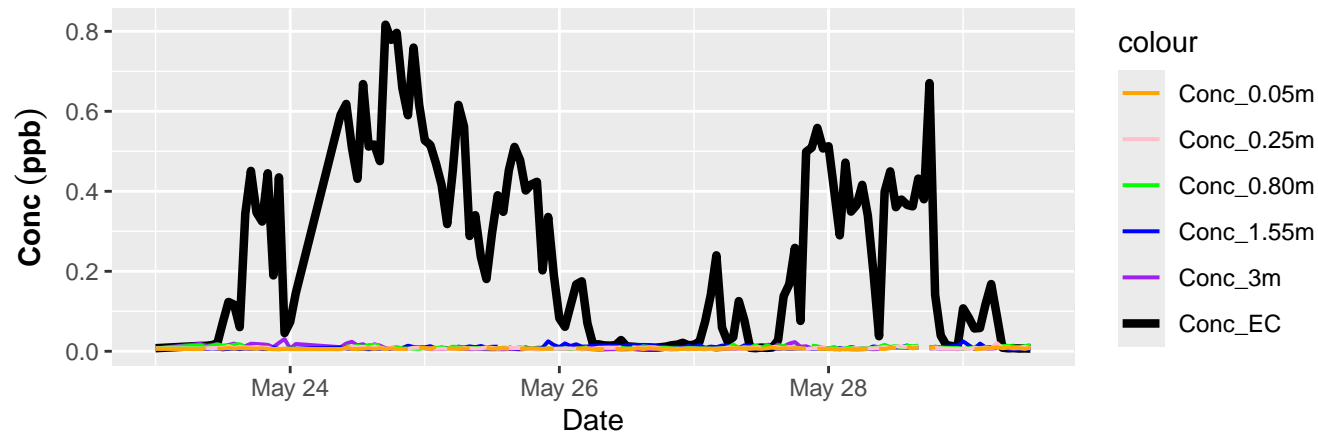

m247.006

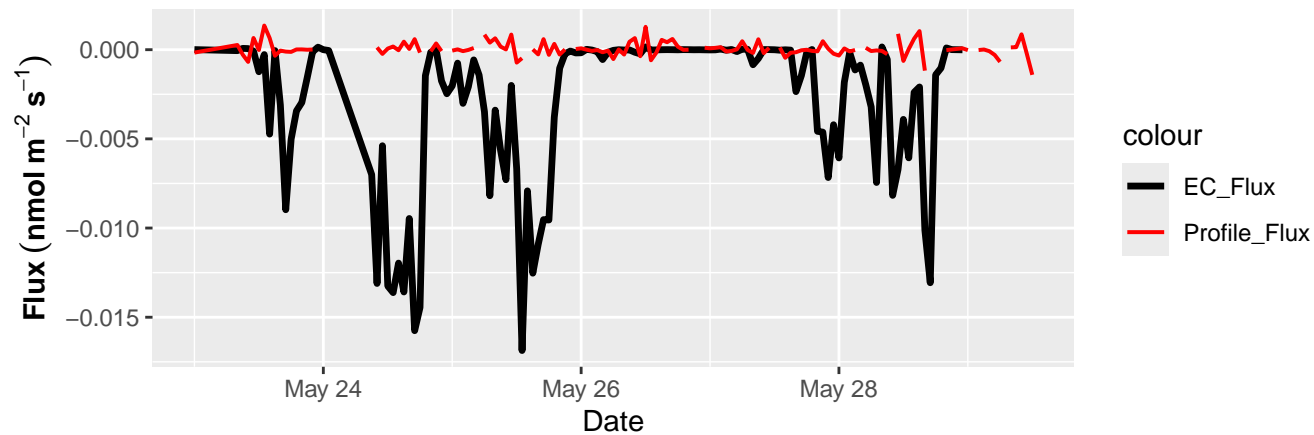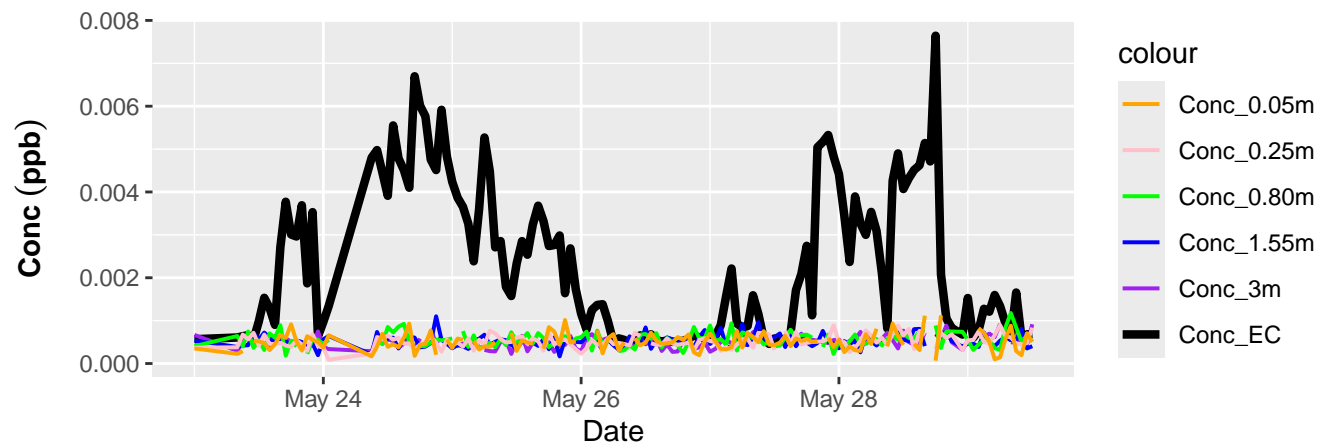



m297.071

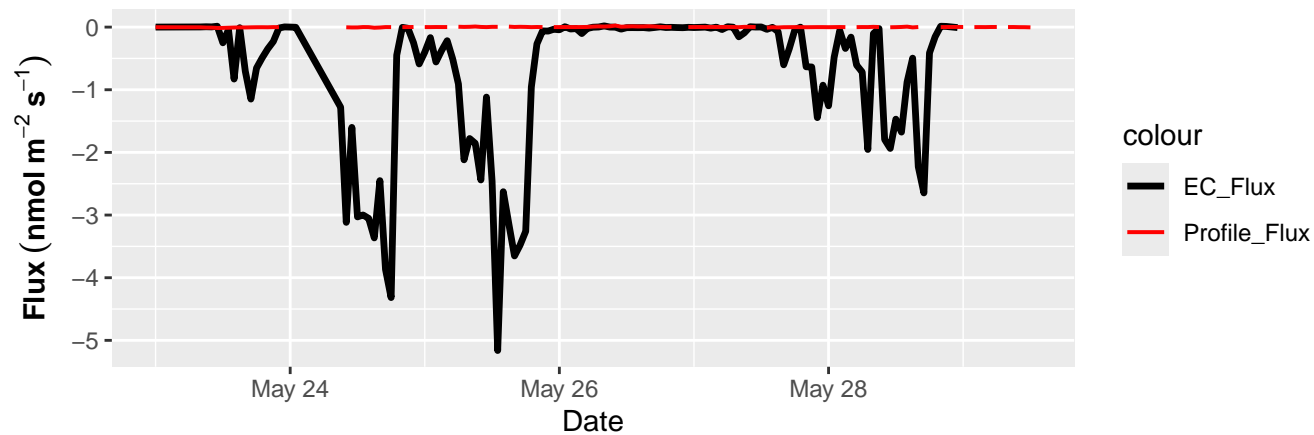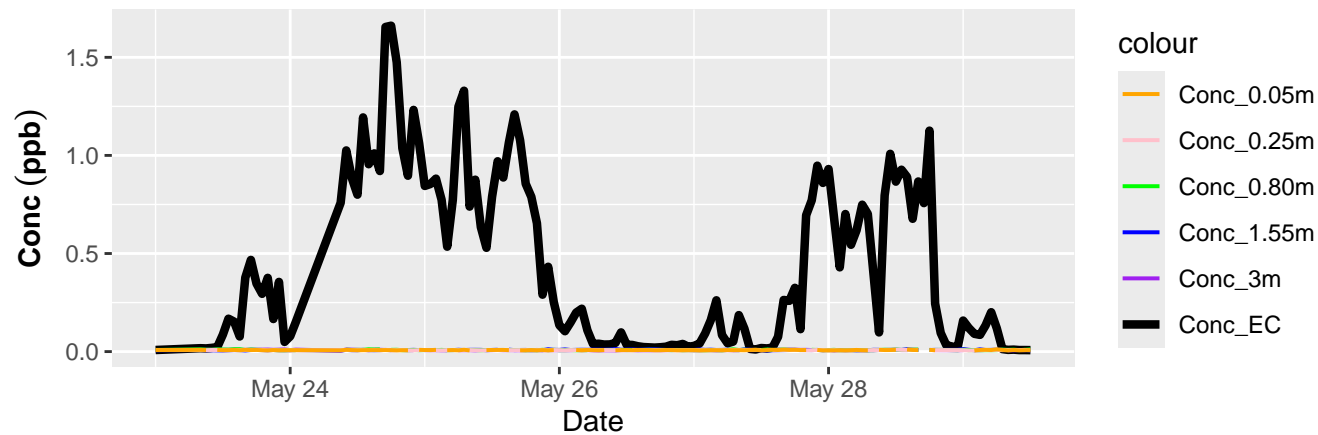

m355.051

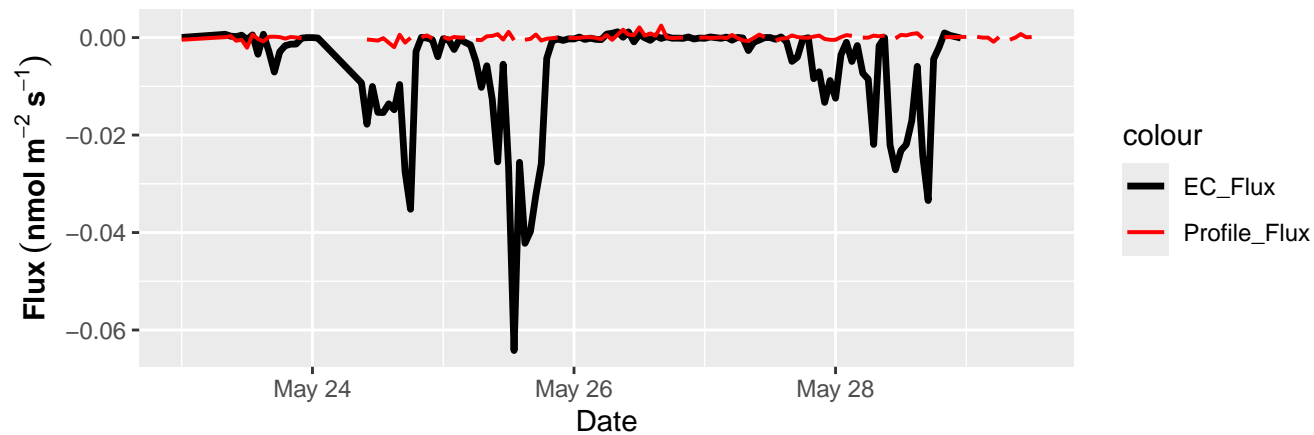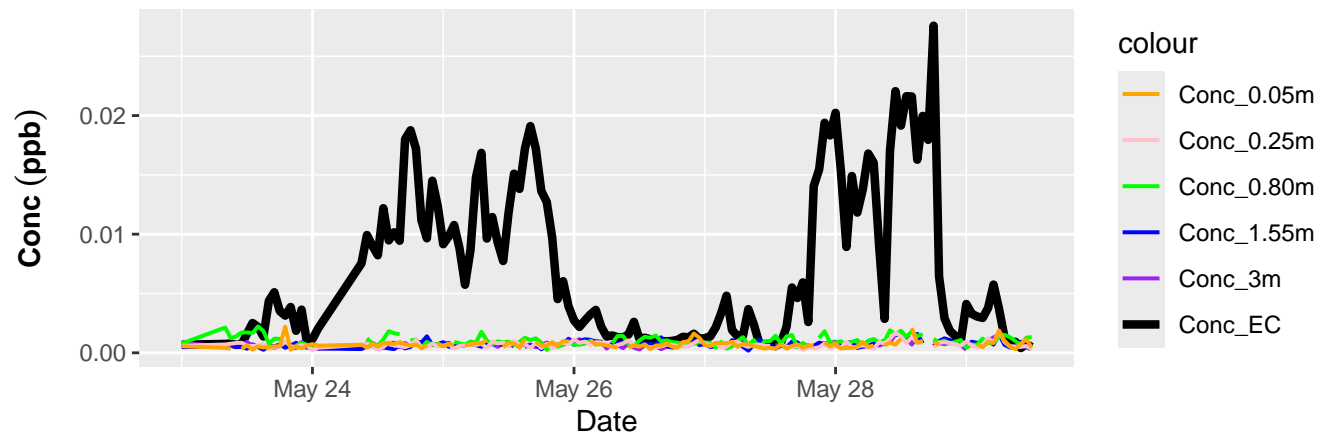

Supplement: Supplementary file 4 [file Fig. S05c - Comparison between EC and profile fluxes - 23 to 30 May.pdf › Supplementary Material/Fig. S05c - Comparison between EC and profile fluxes - 23 to 30 May.pdf]

# m31.018

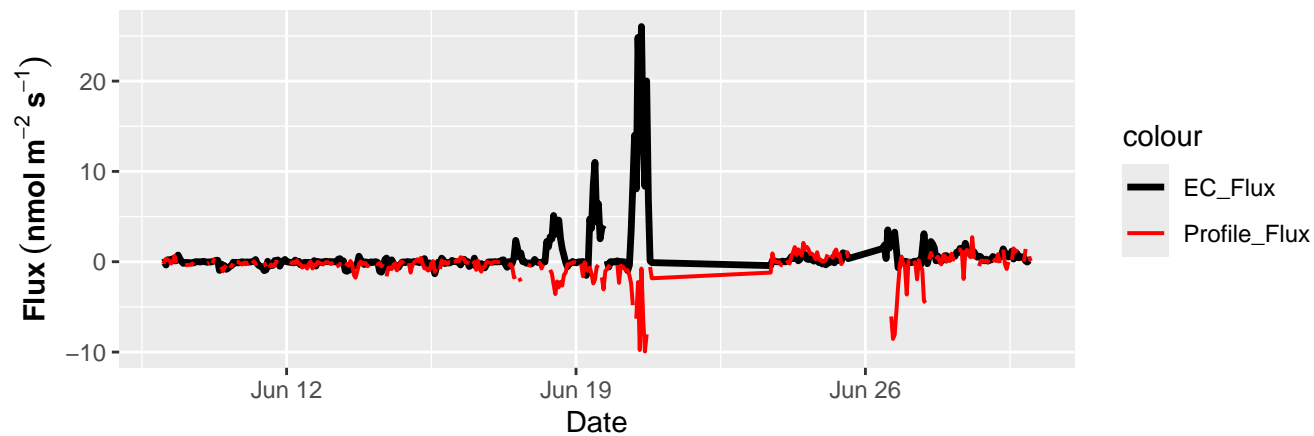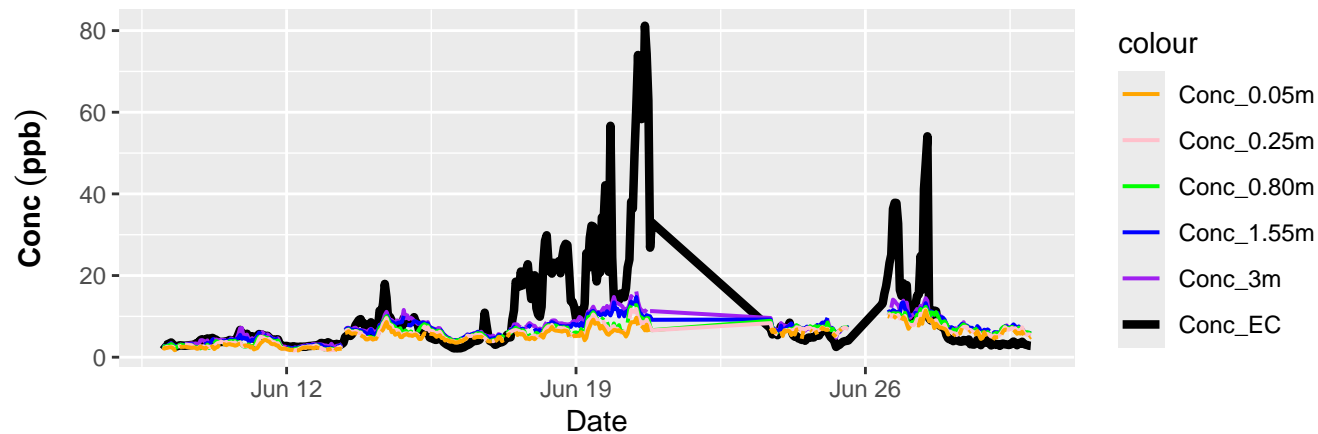

# m33.033

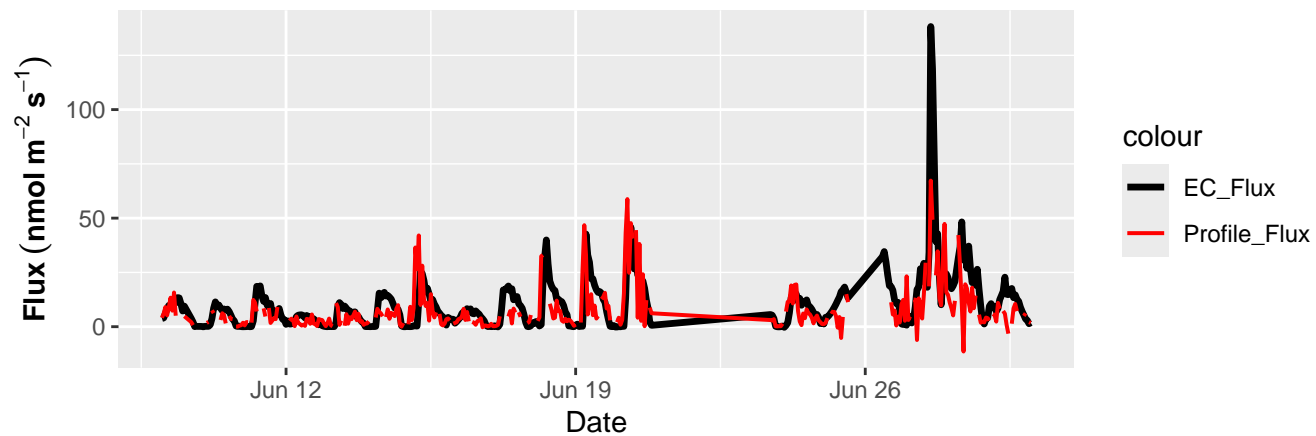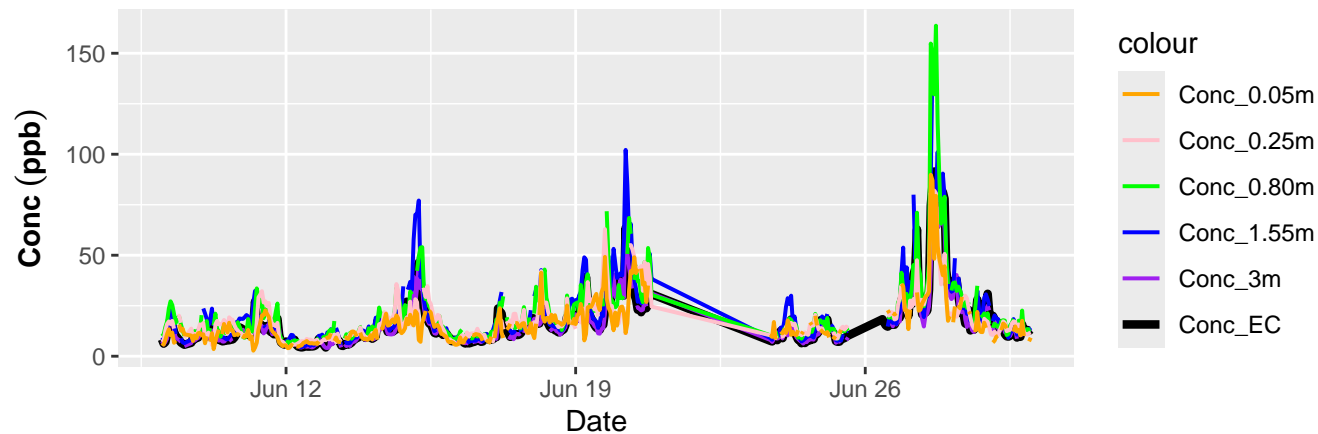

# m41.038

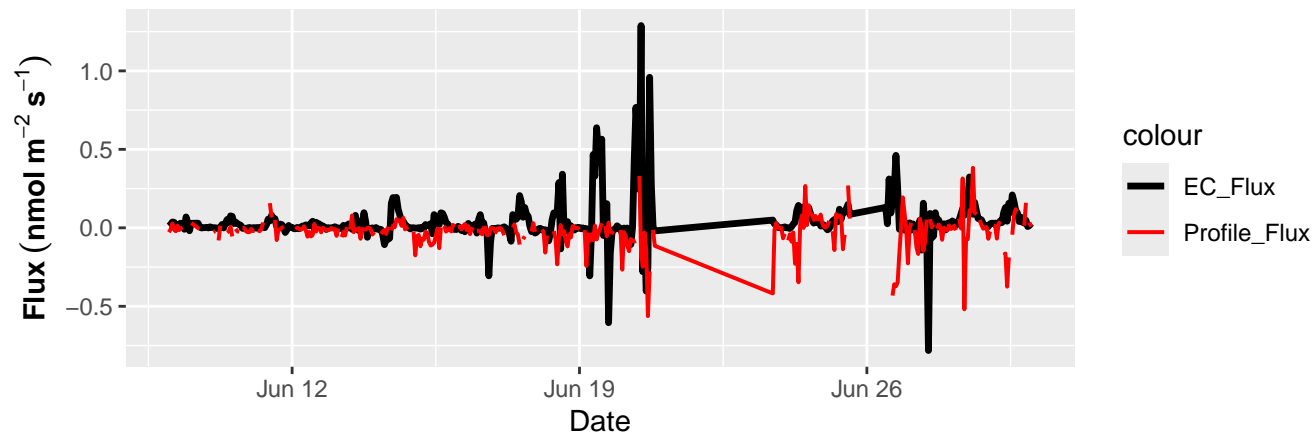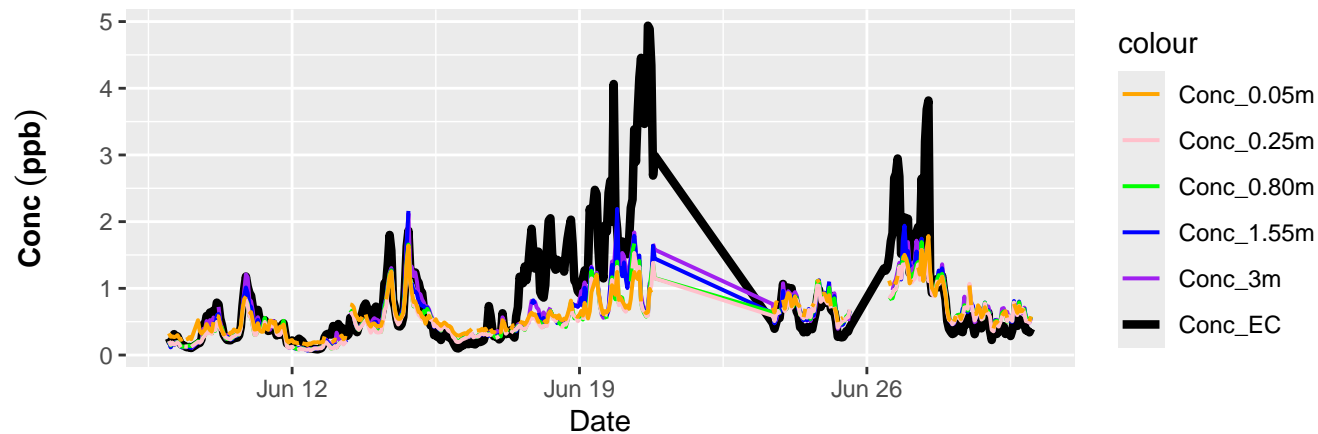

m43.018

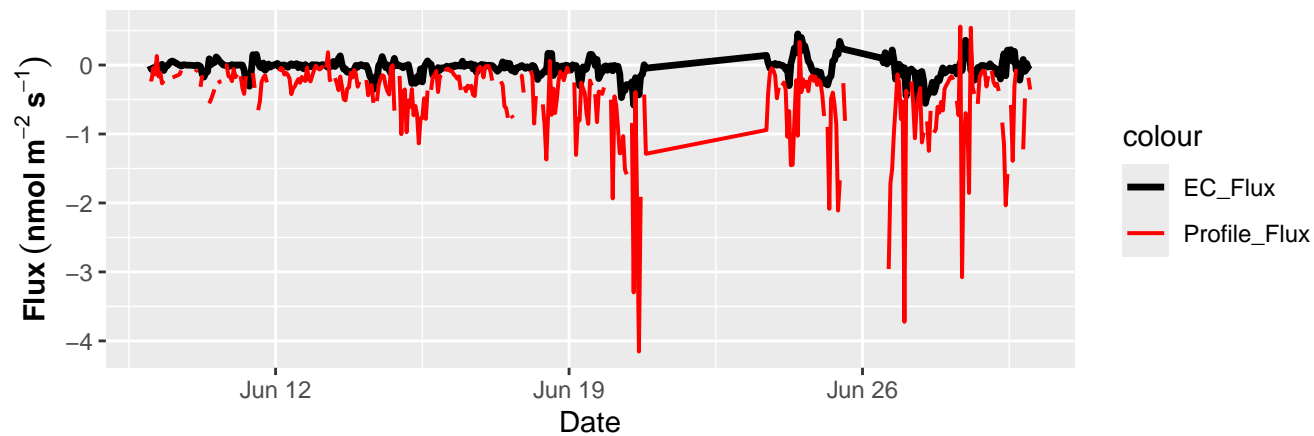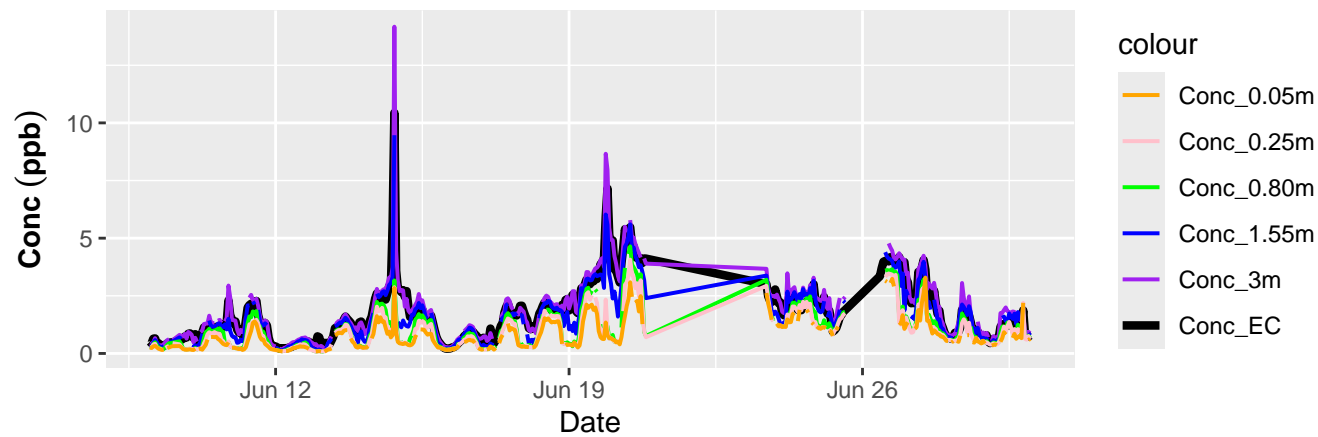

m45.033

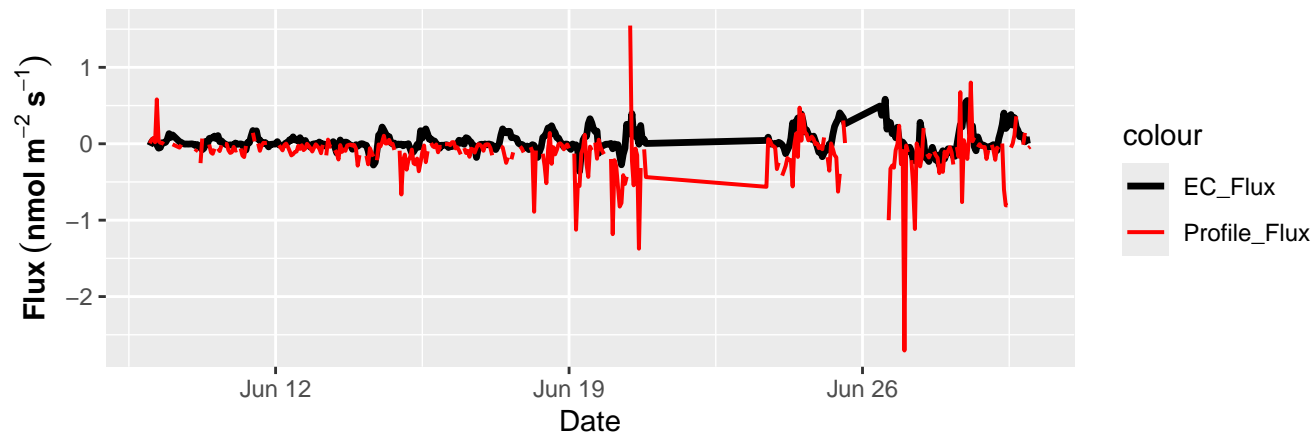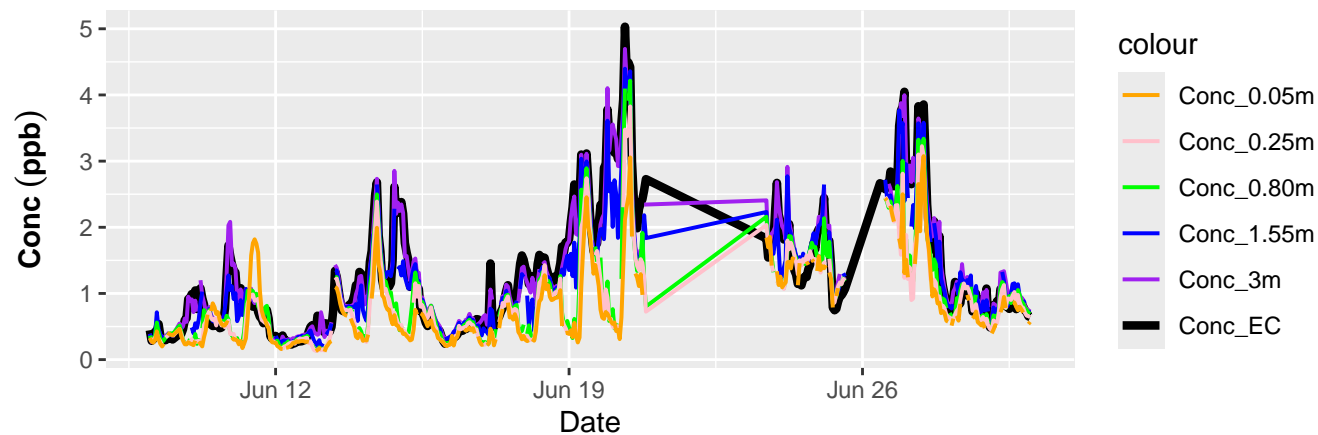

m47.013

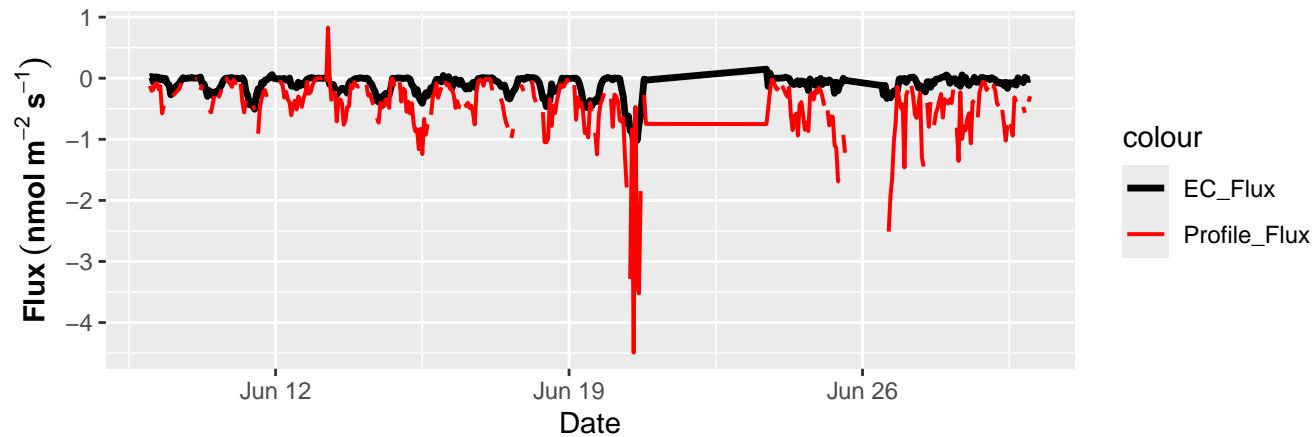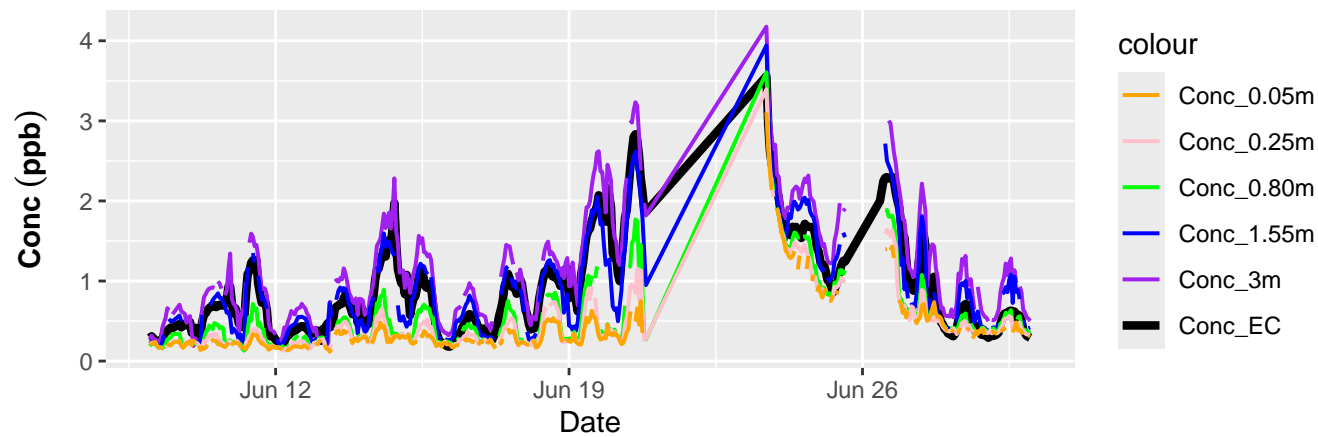

# m49.014

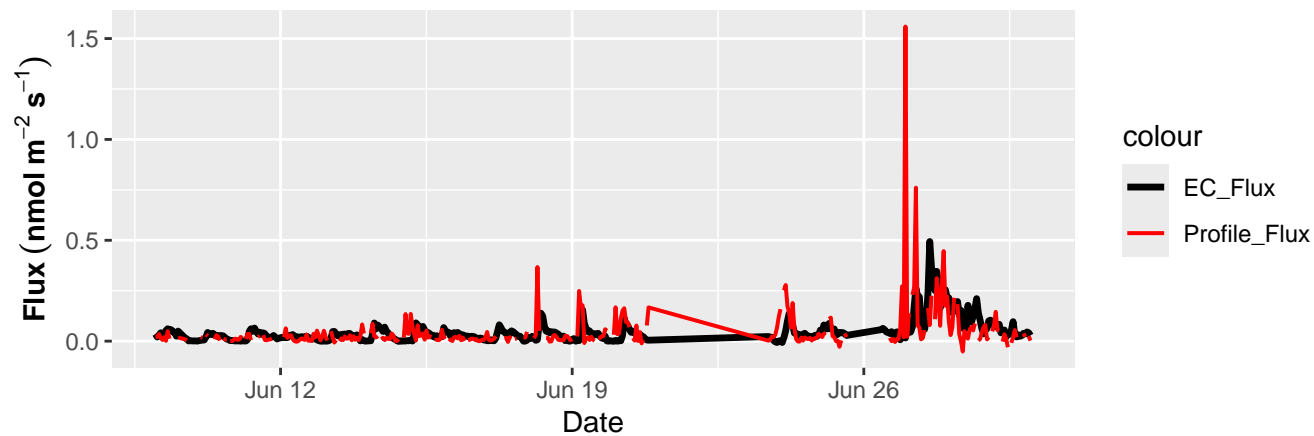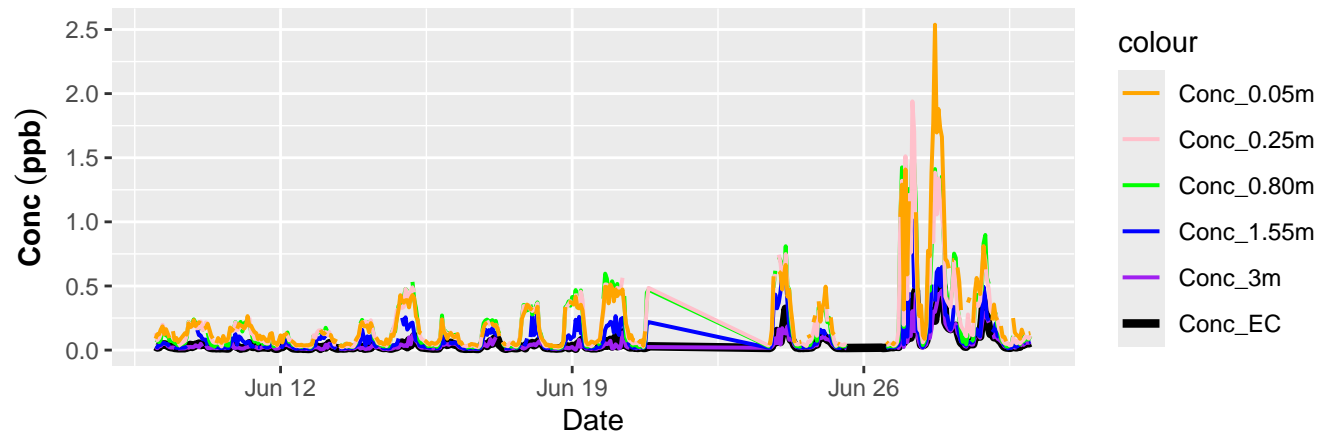

# m51.022

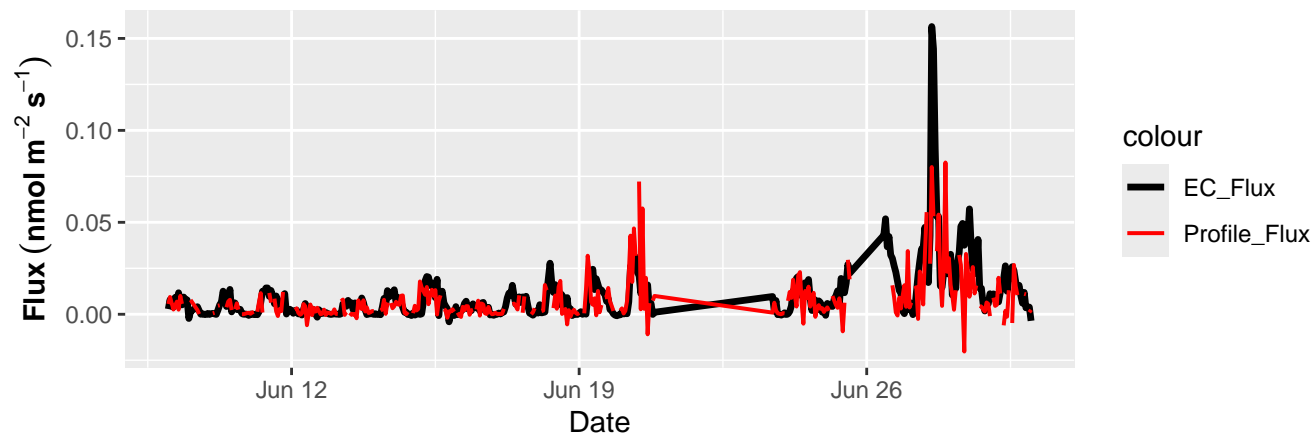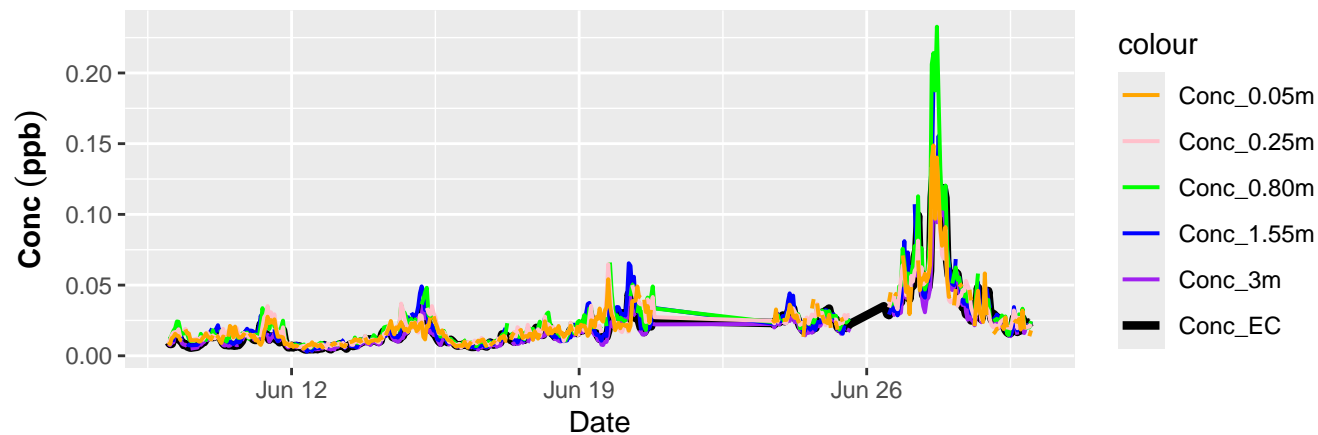



**m57.069**

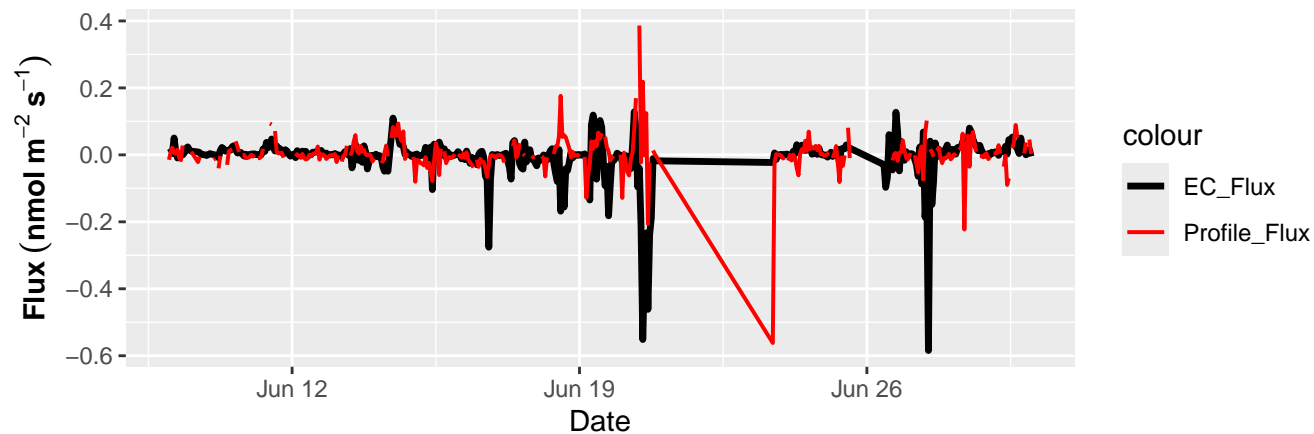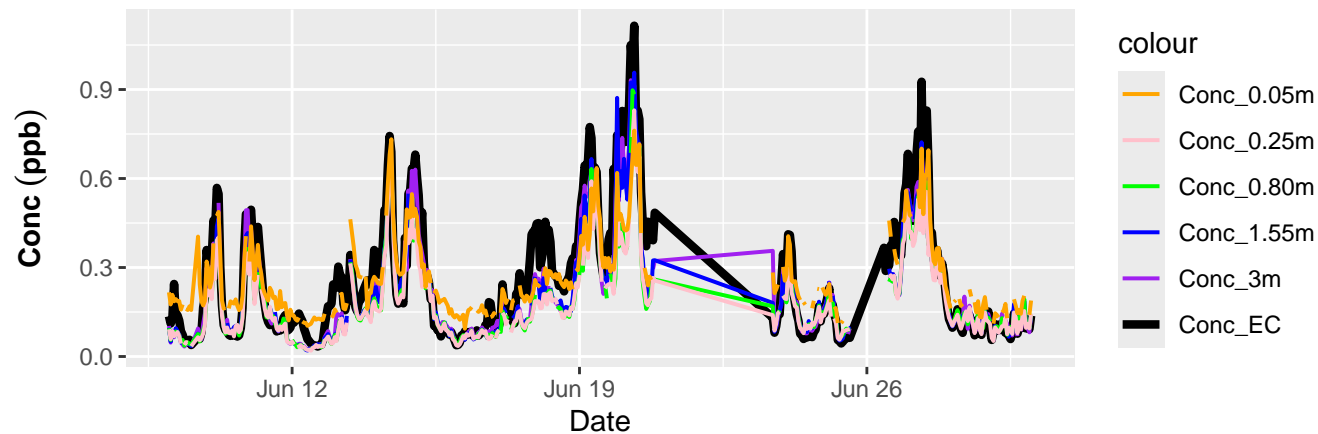

m59.049

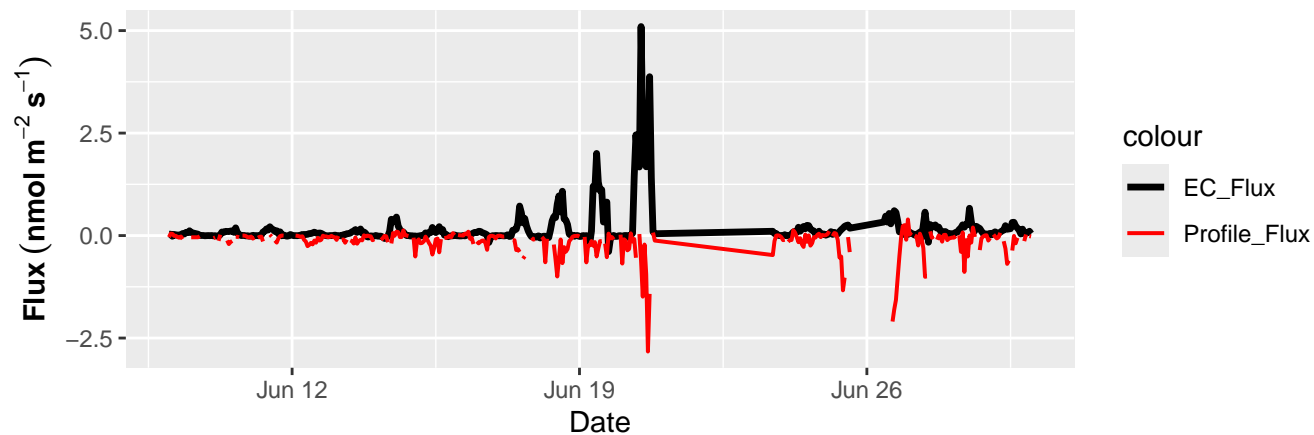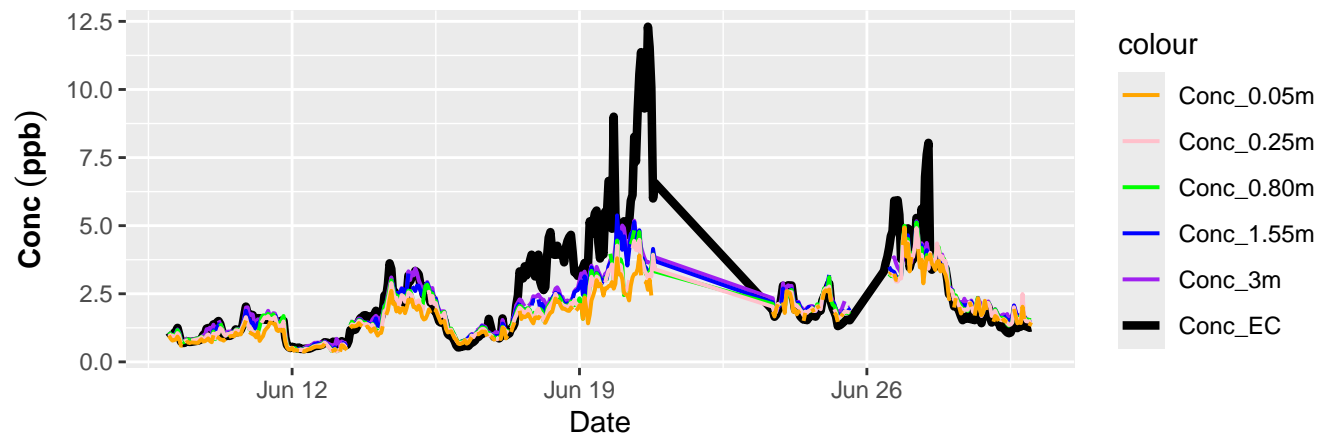

# m60.048

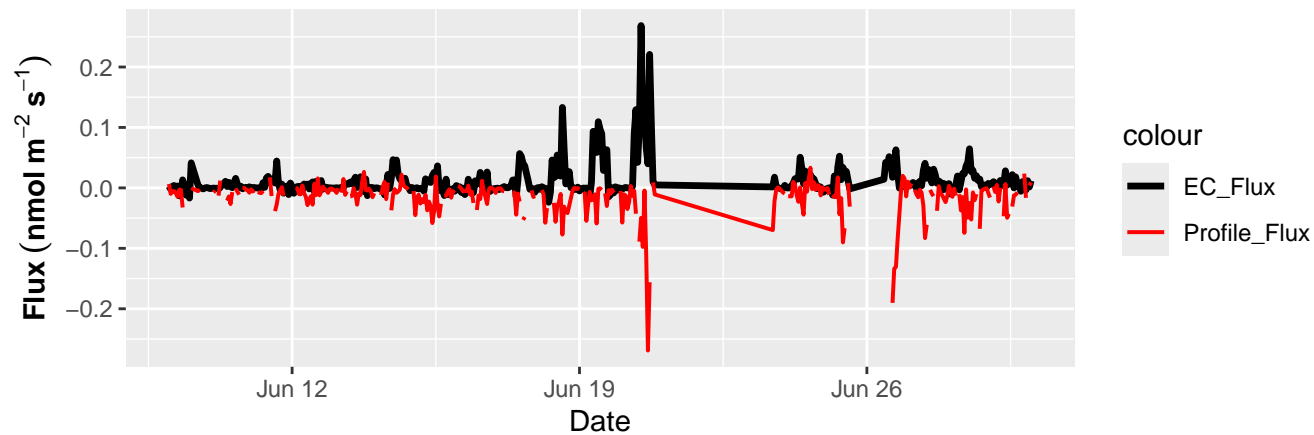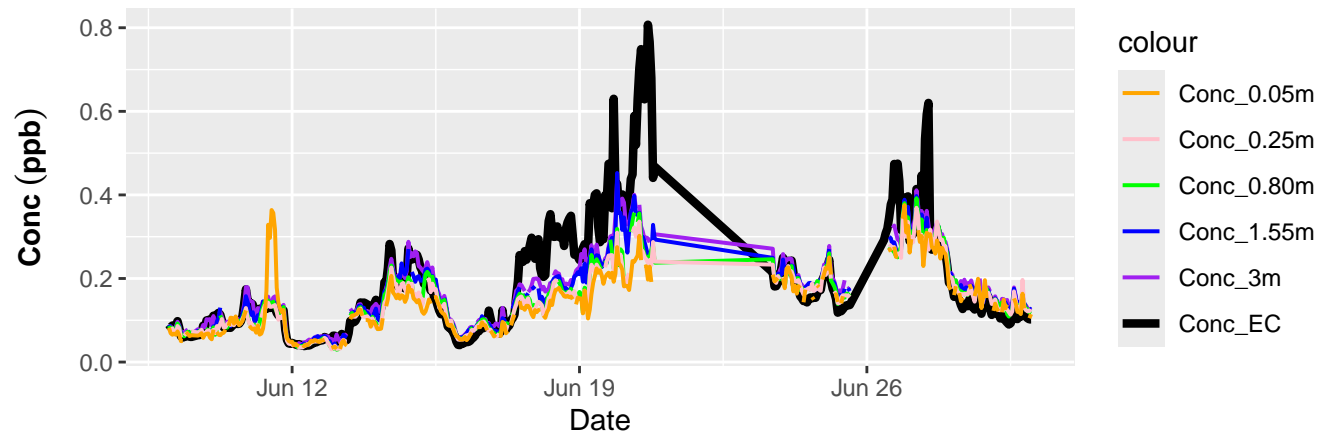

**m61.029**

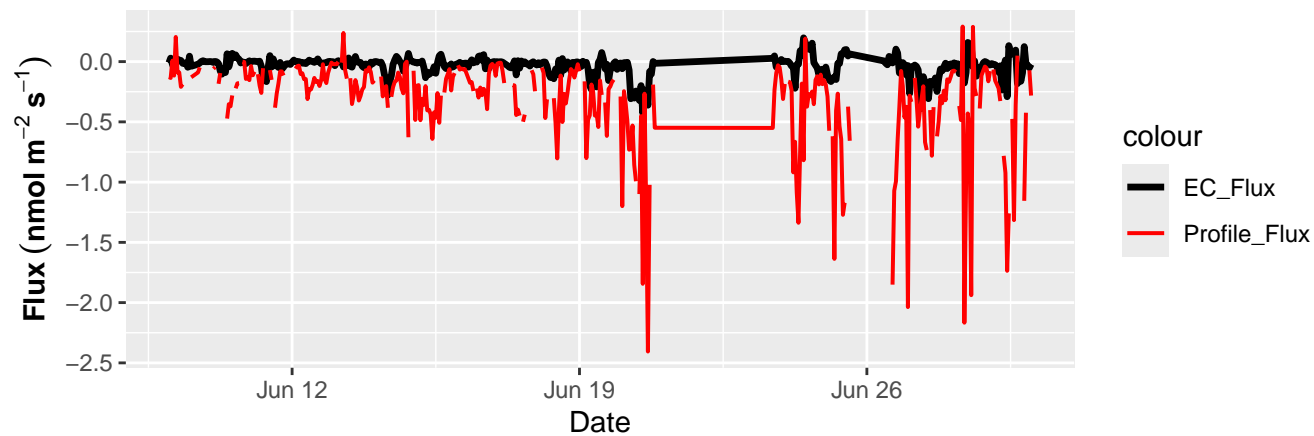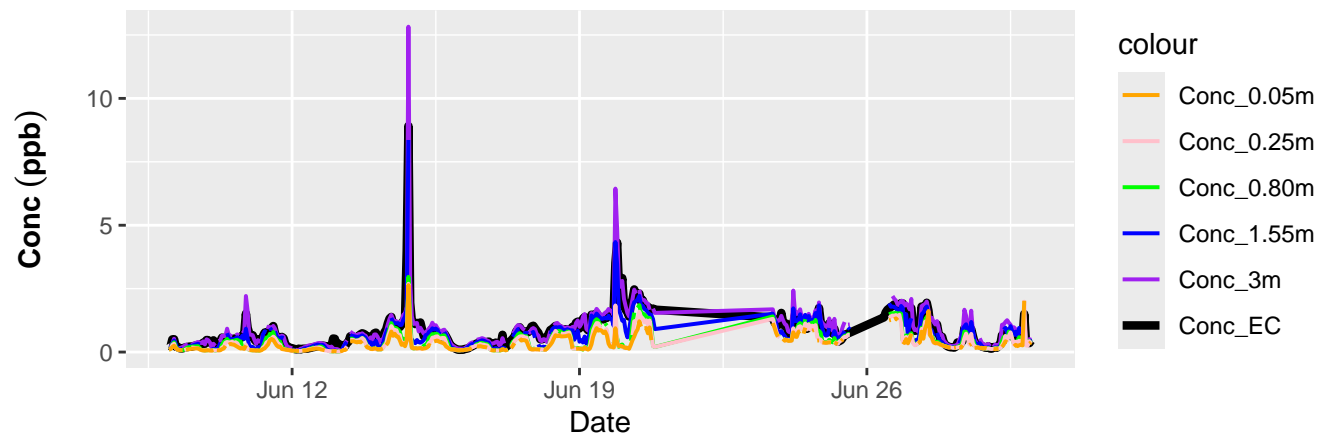

**m62.029**

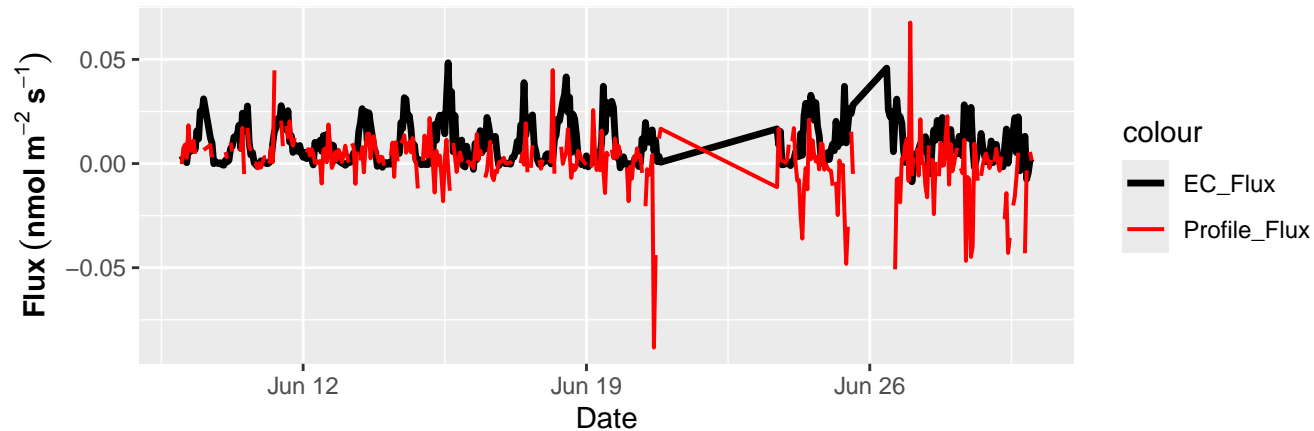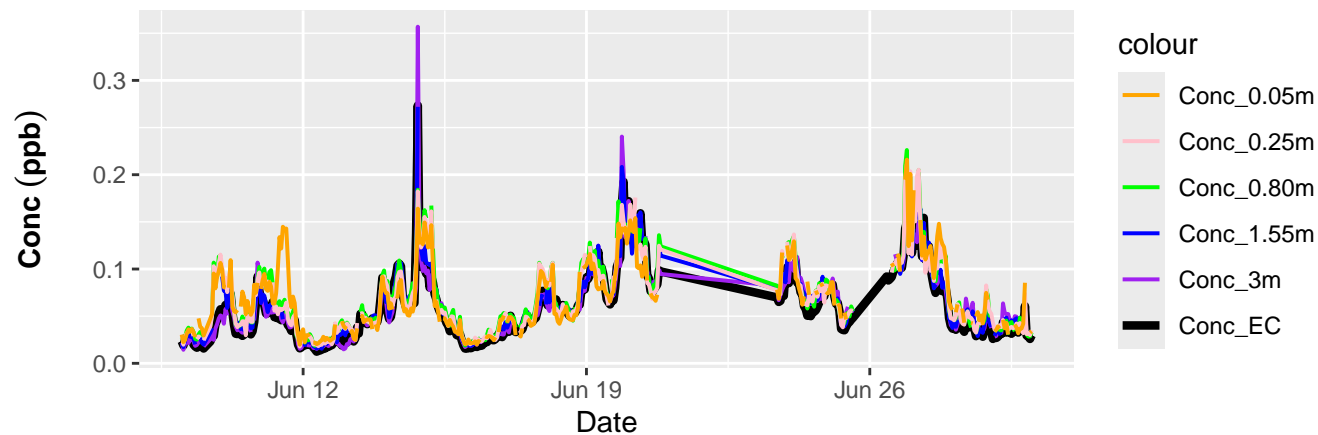

**m63.006**

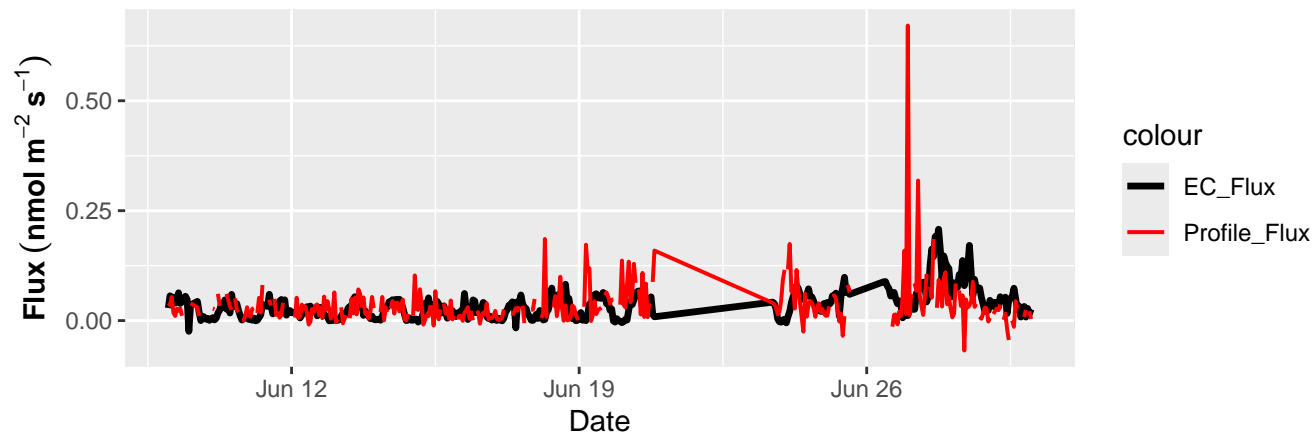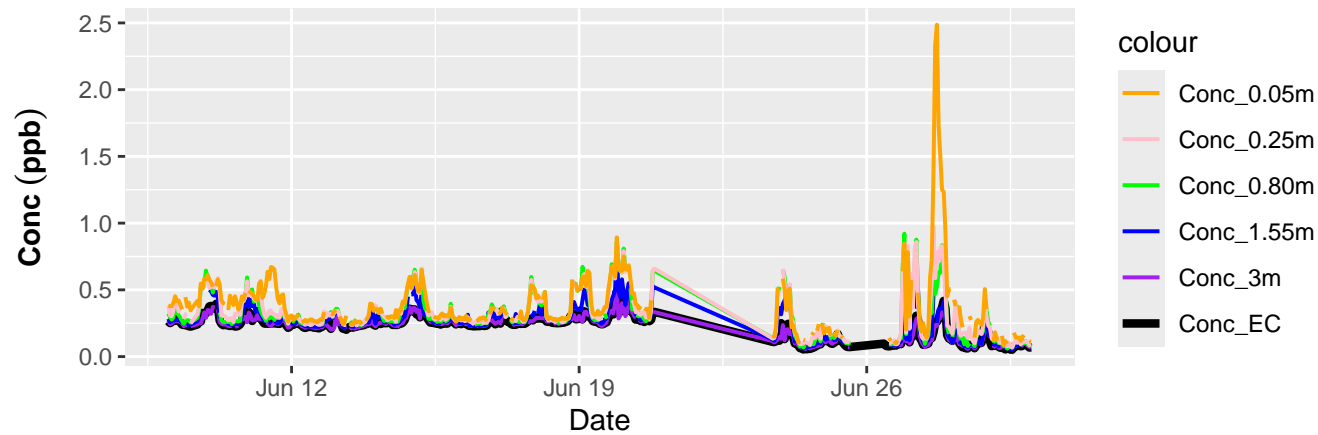

# m67.053

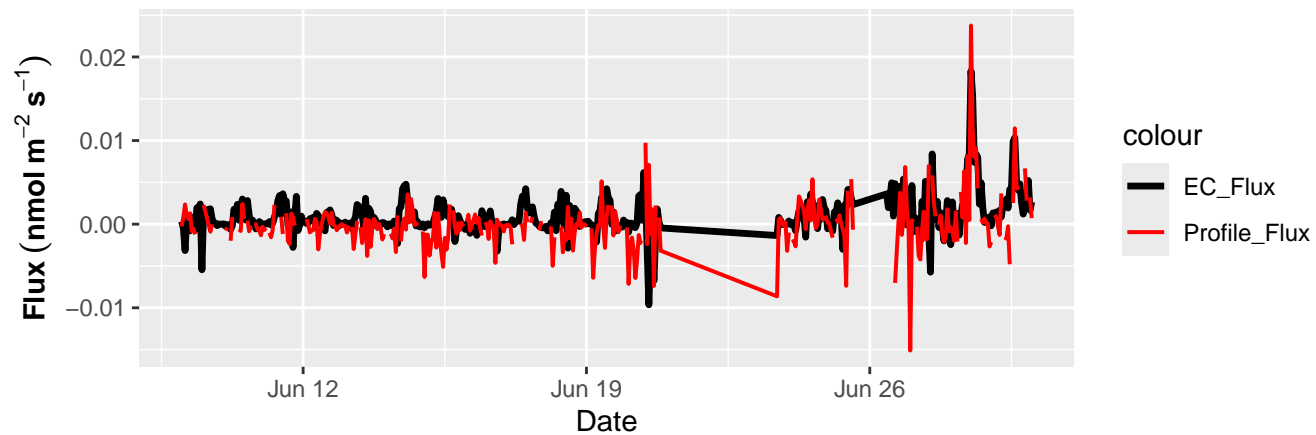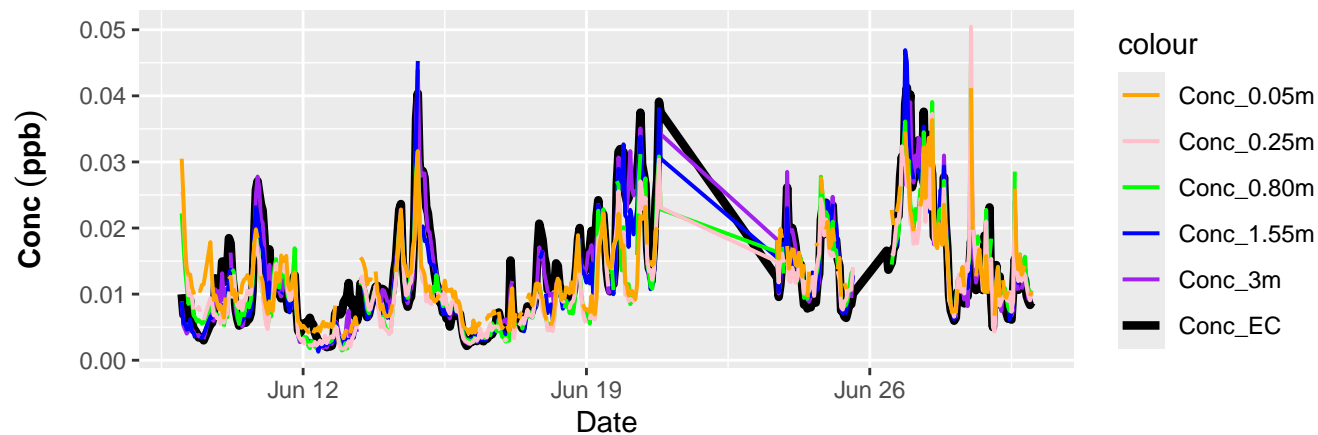

# m69.070

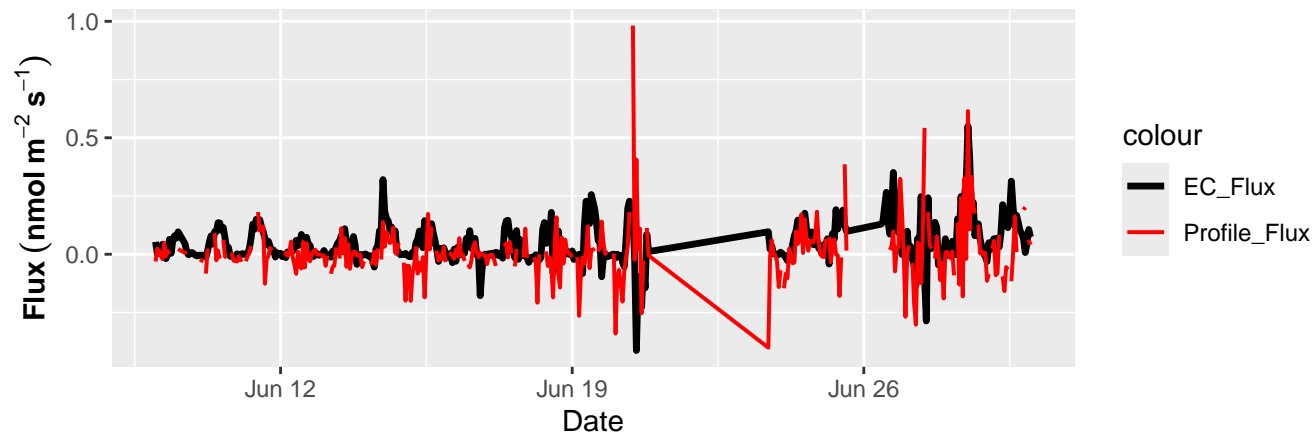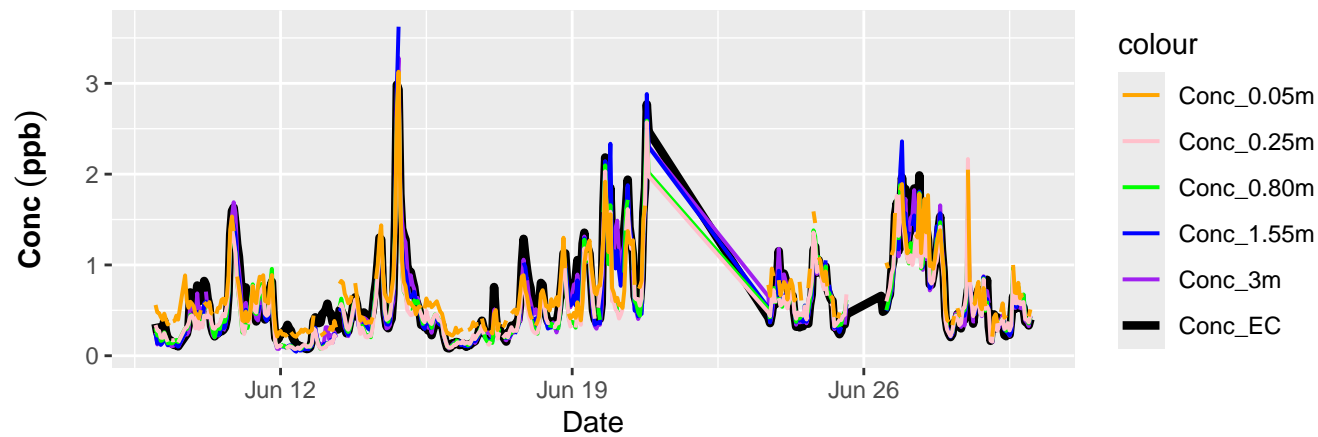



**m73.064**

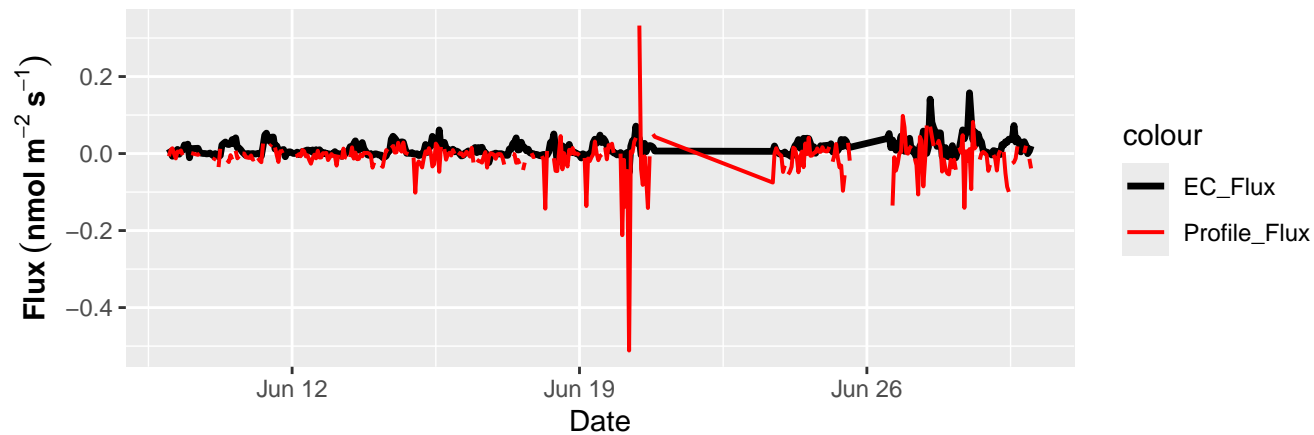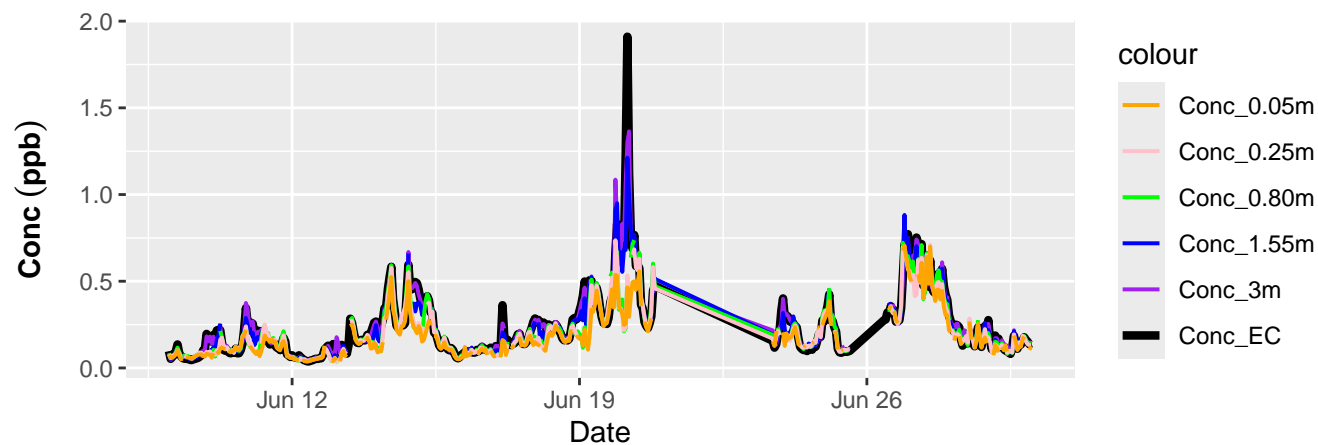

m75.025

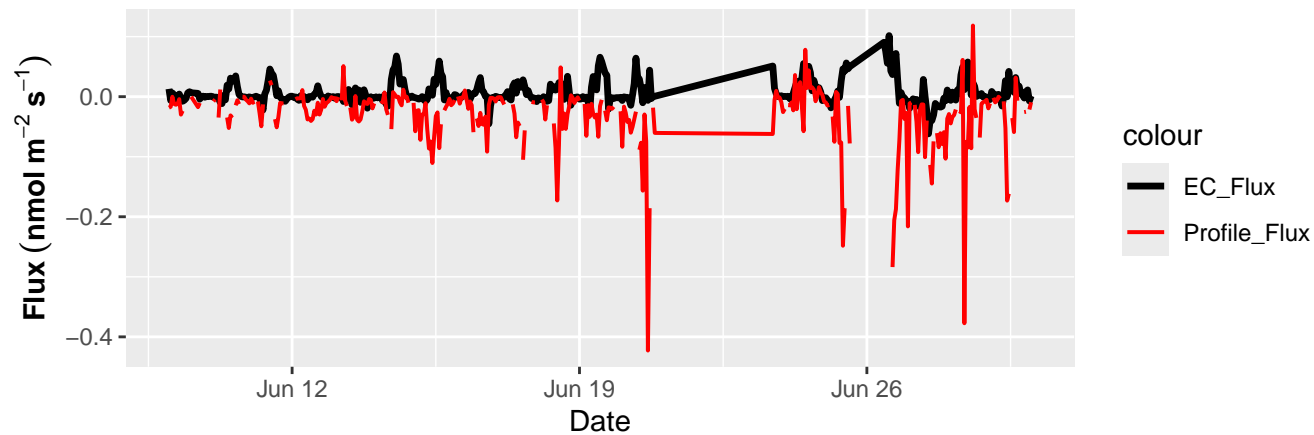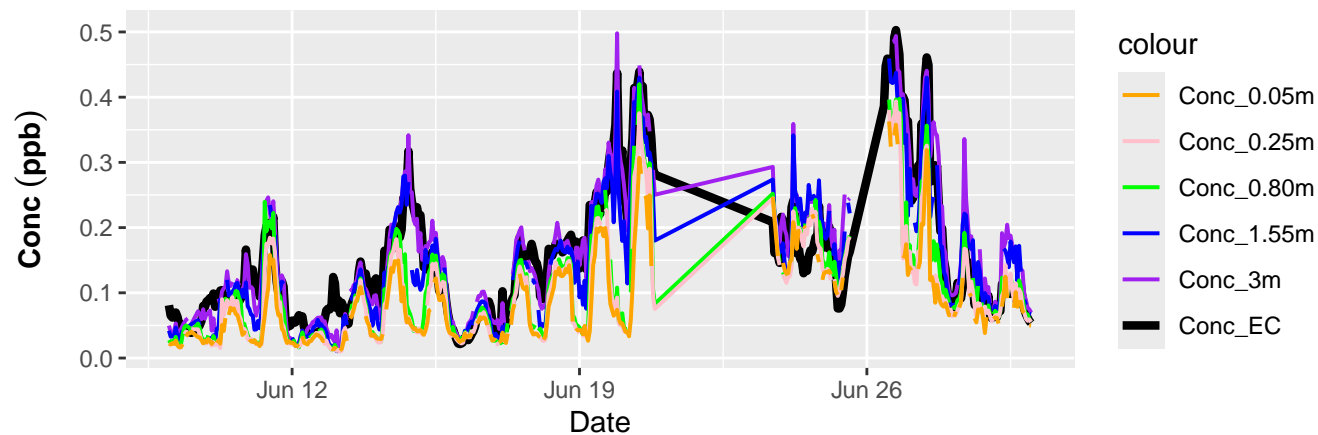

**m77.005**

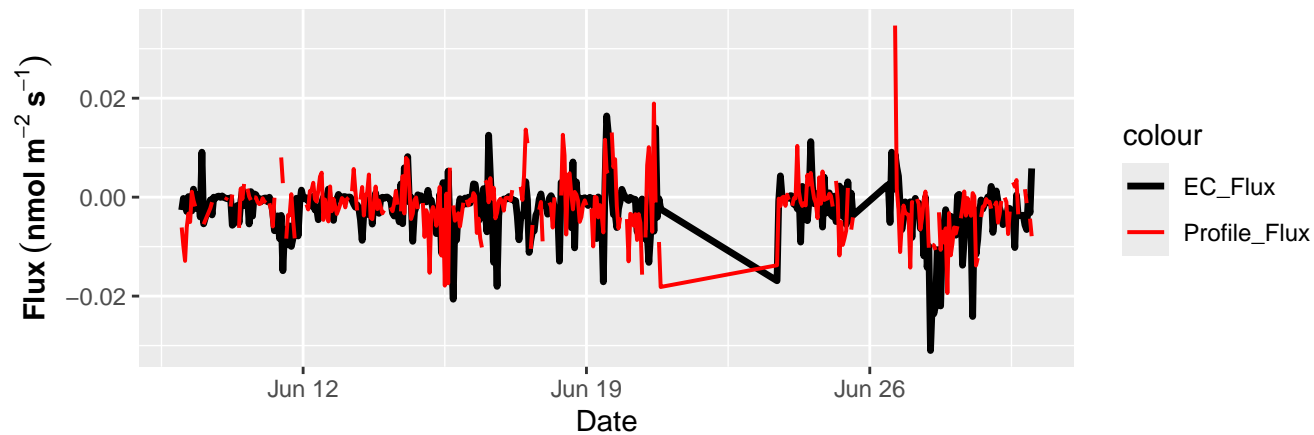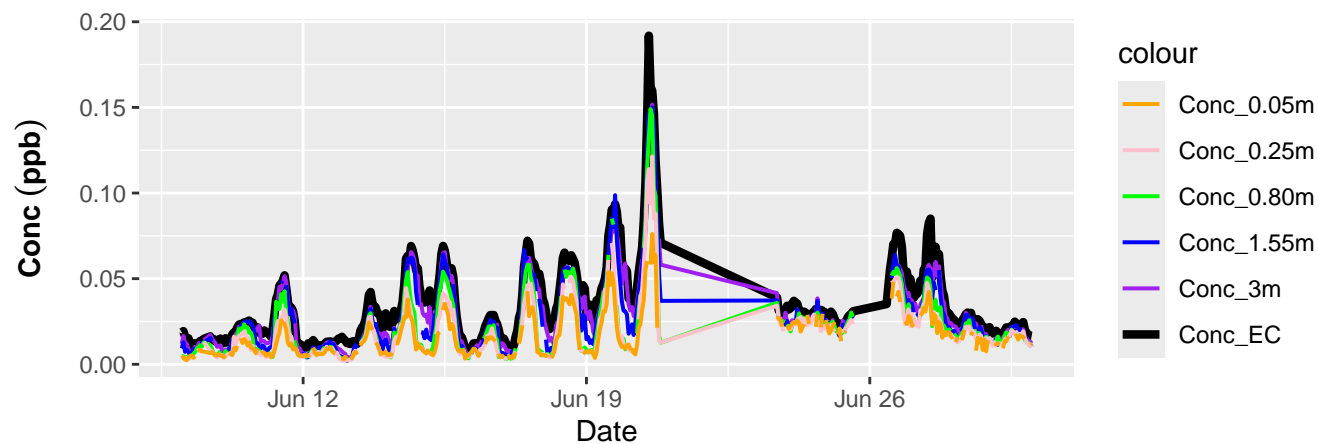

m82.074

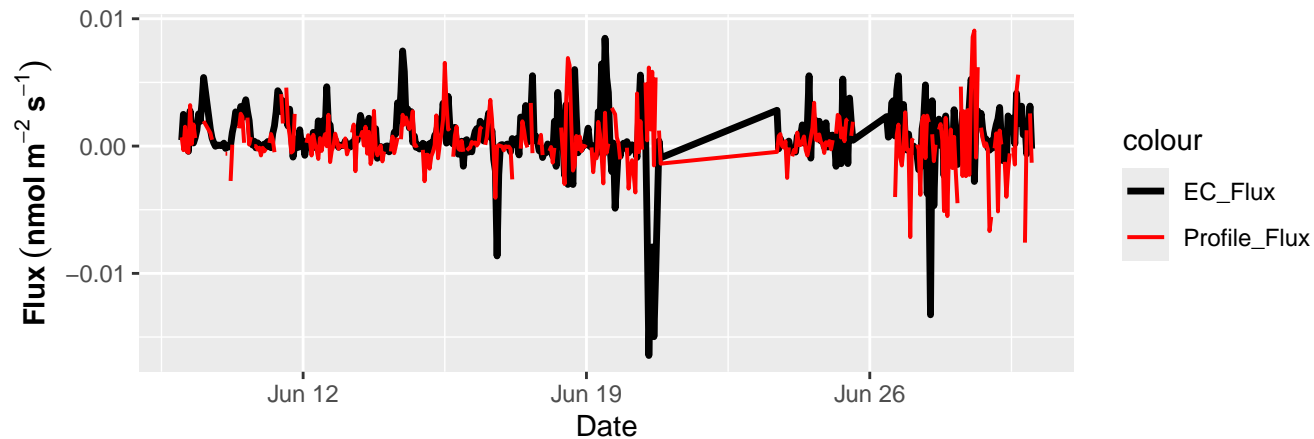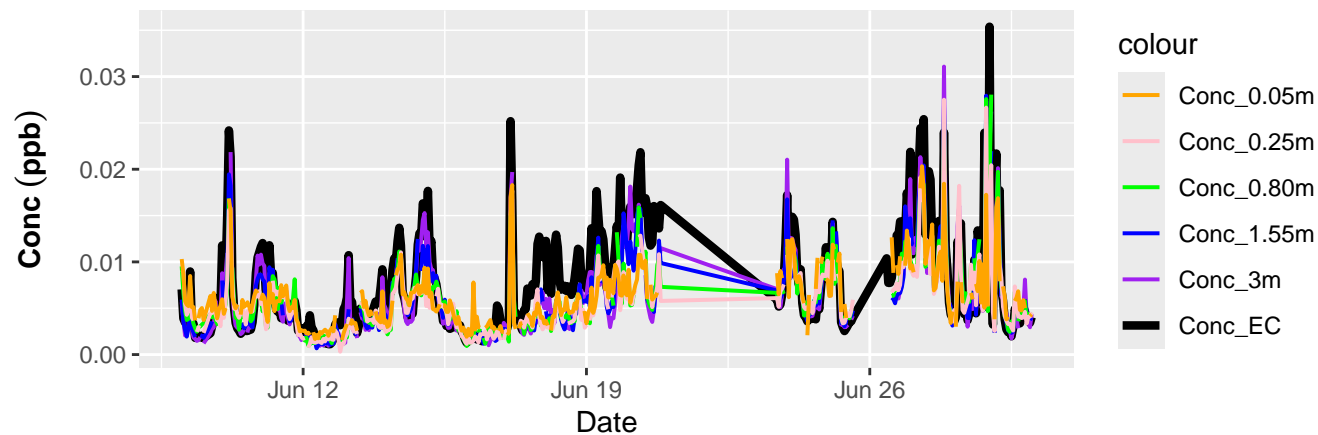

m83.049

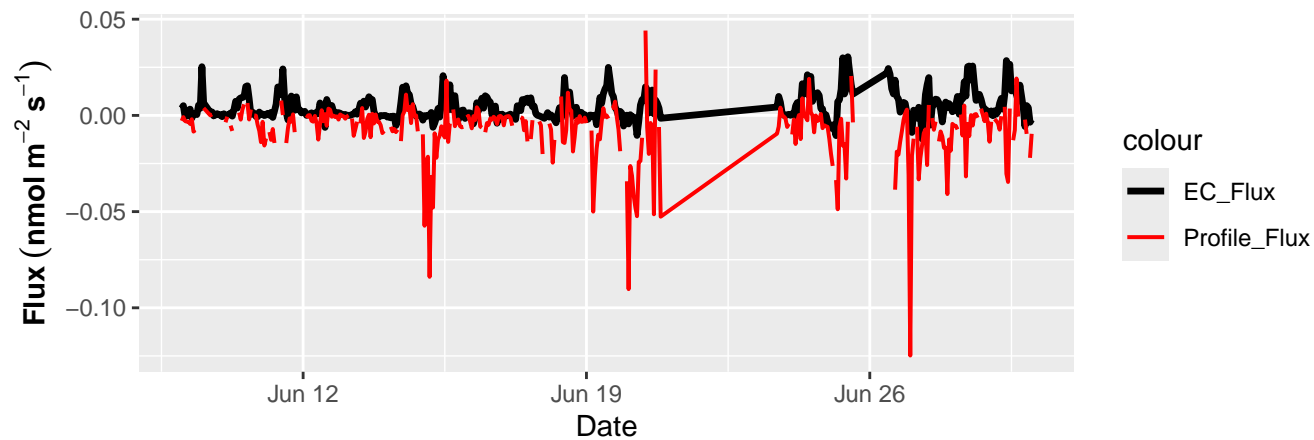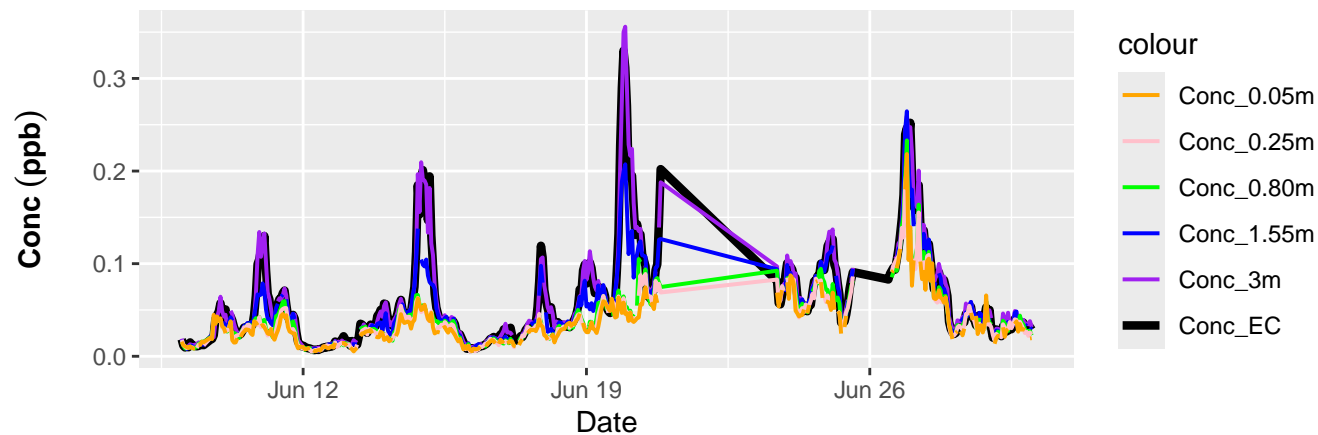

# m83.084

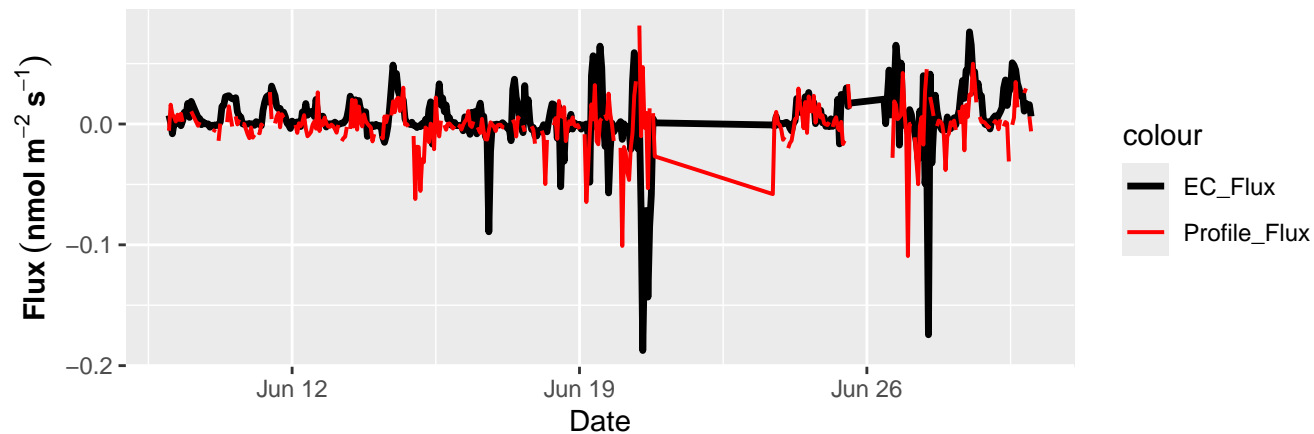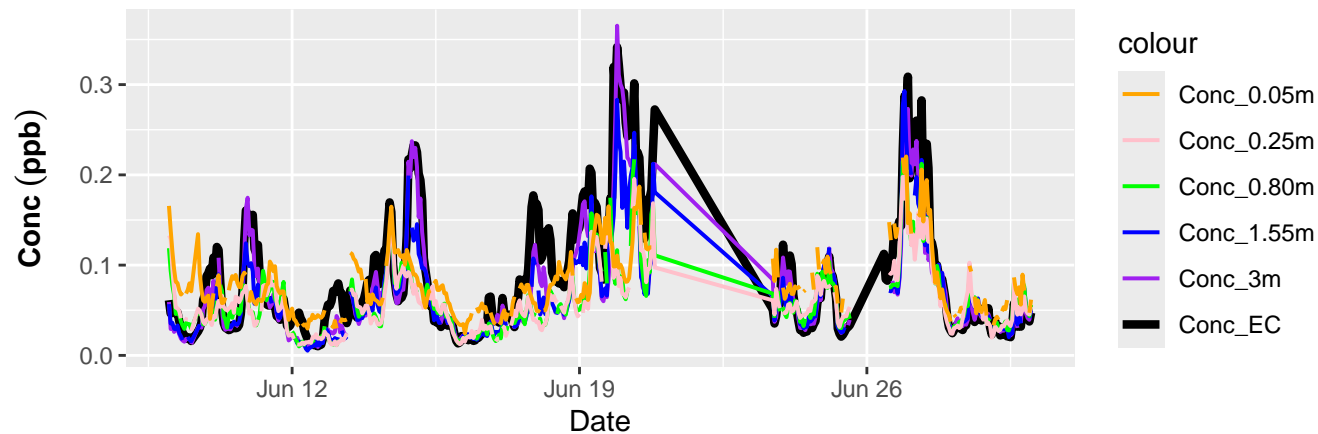

m87.042

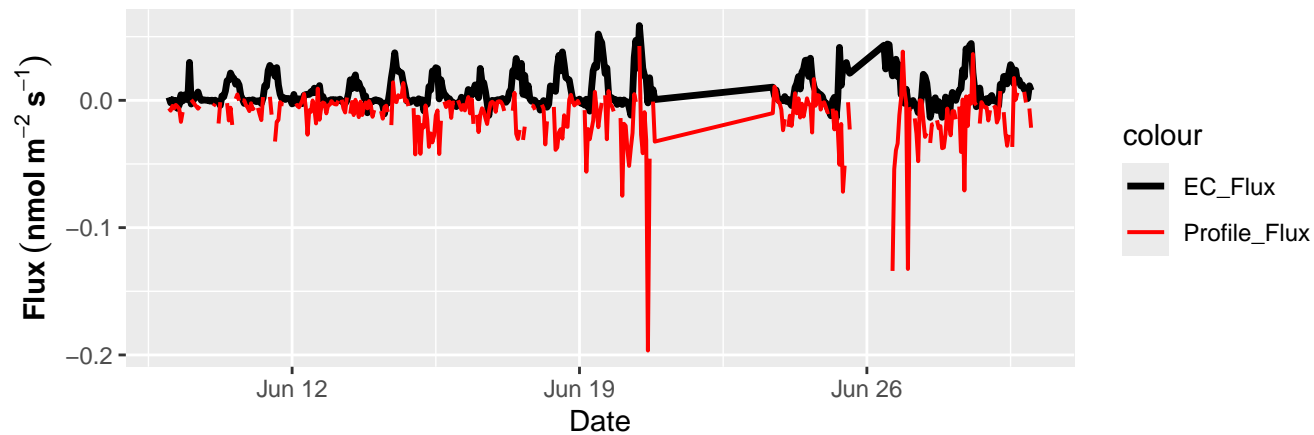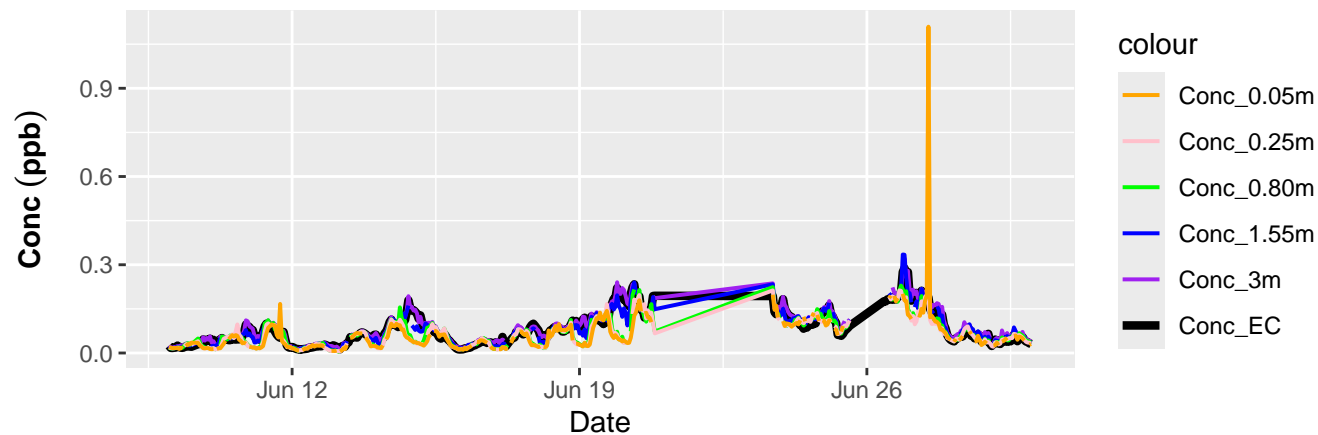

# m87.078

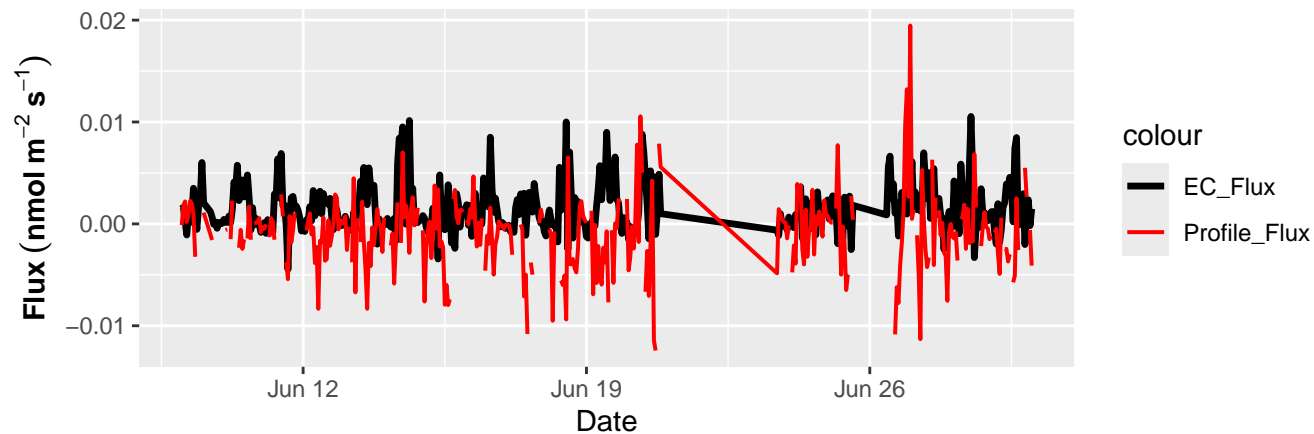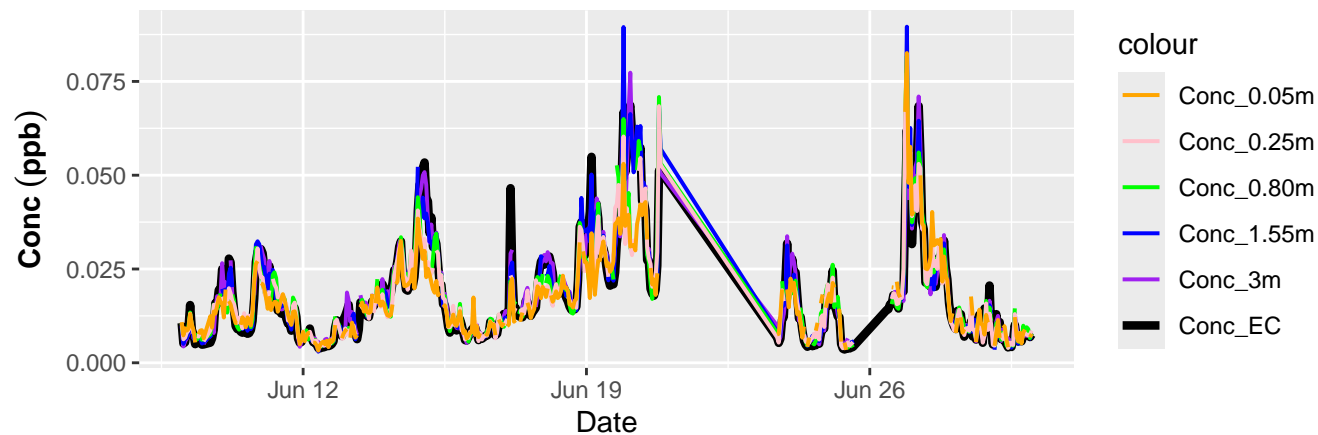



# m93.035

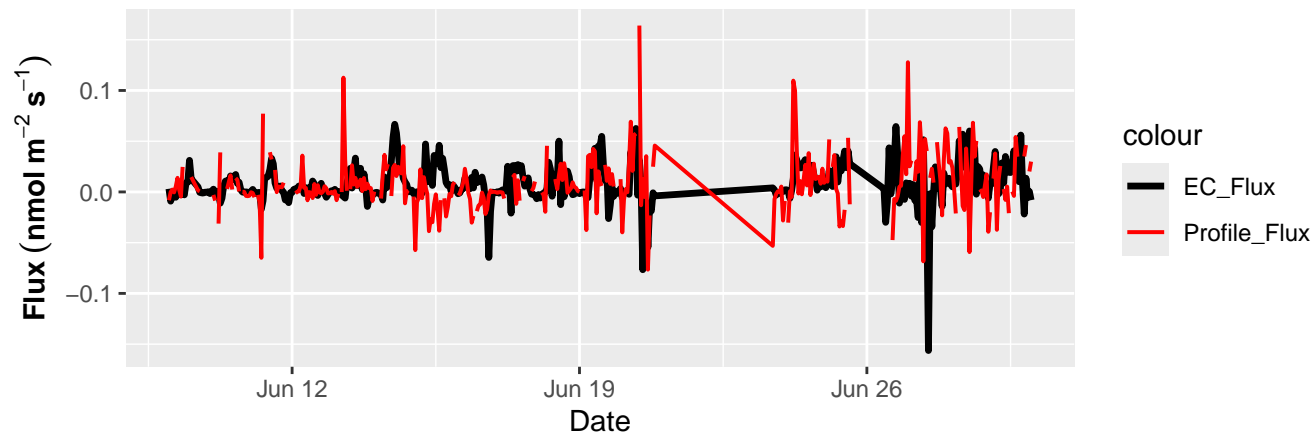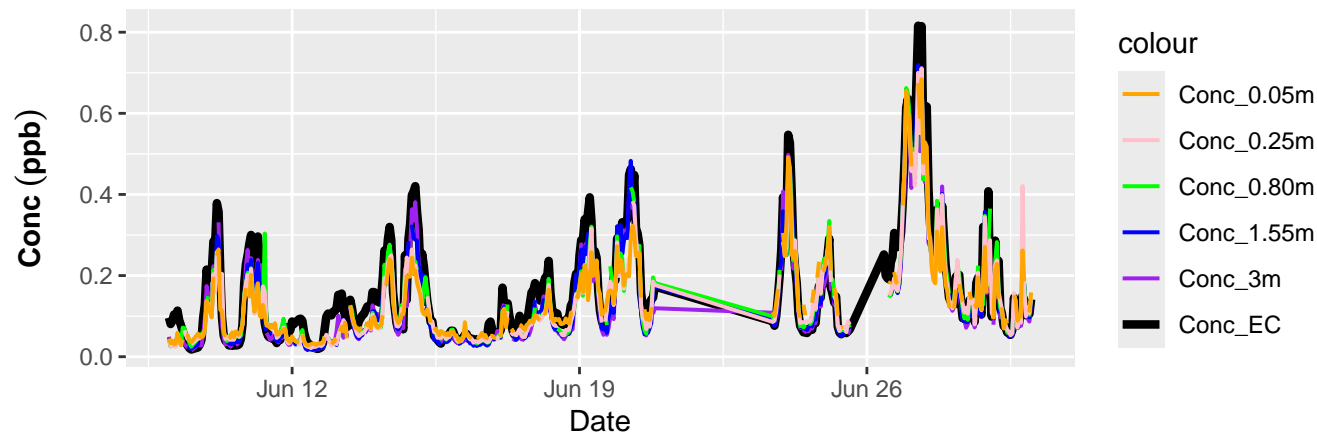

m95.015

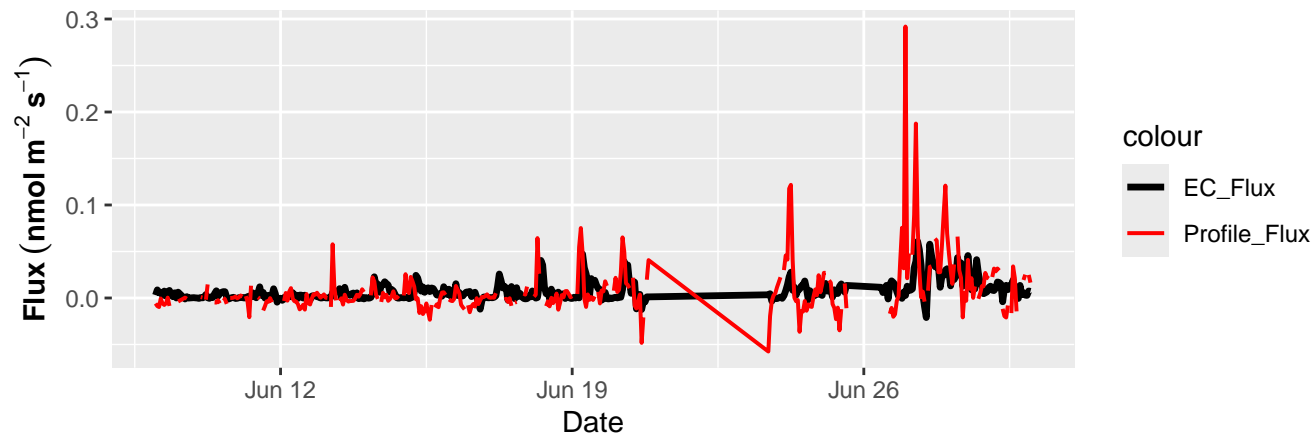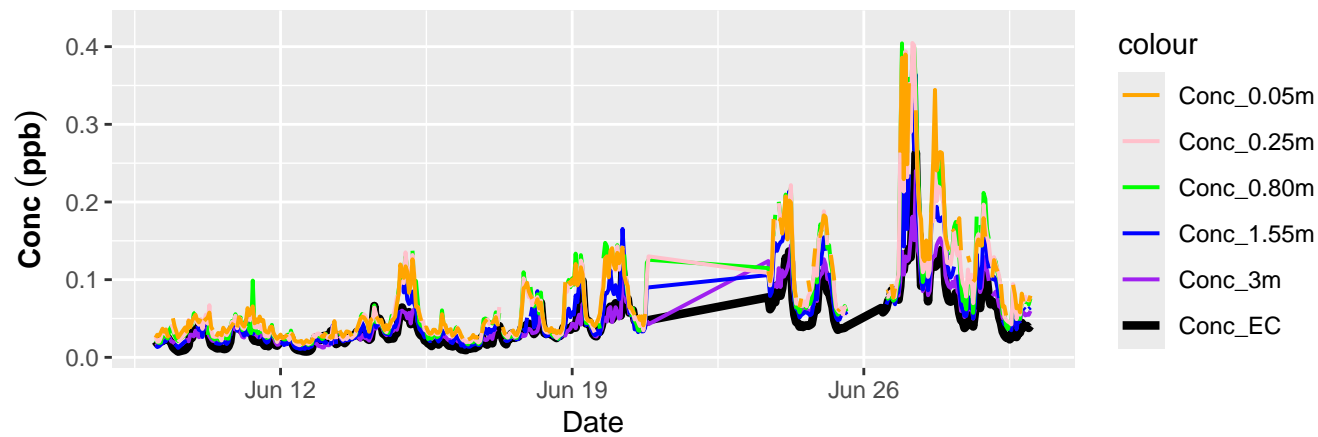

**m95.083**

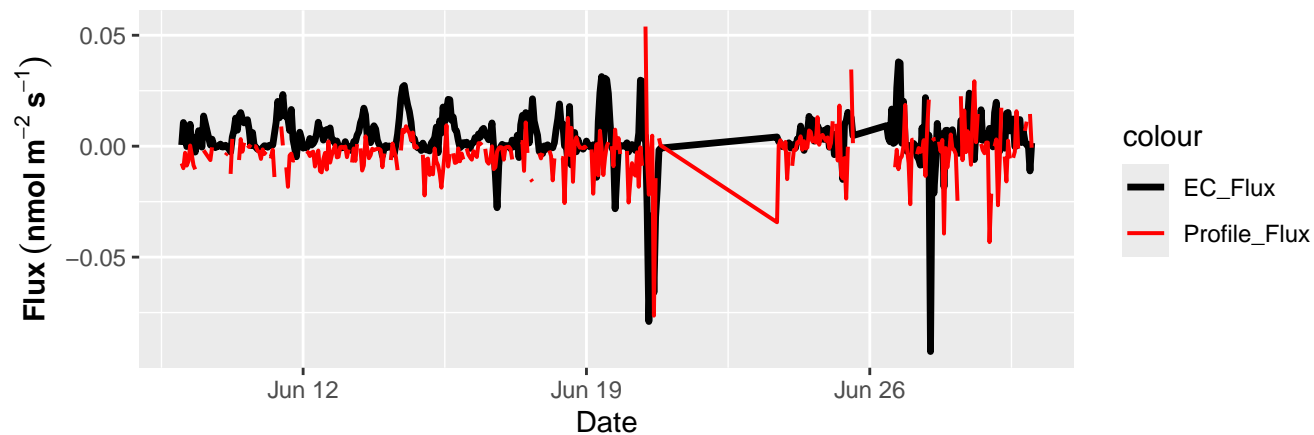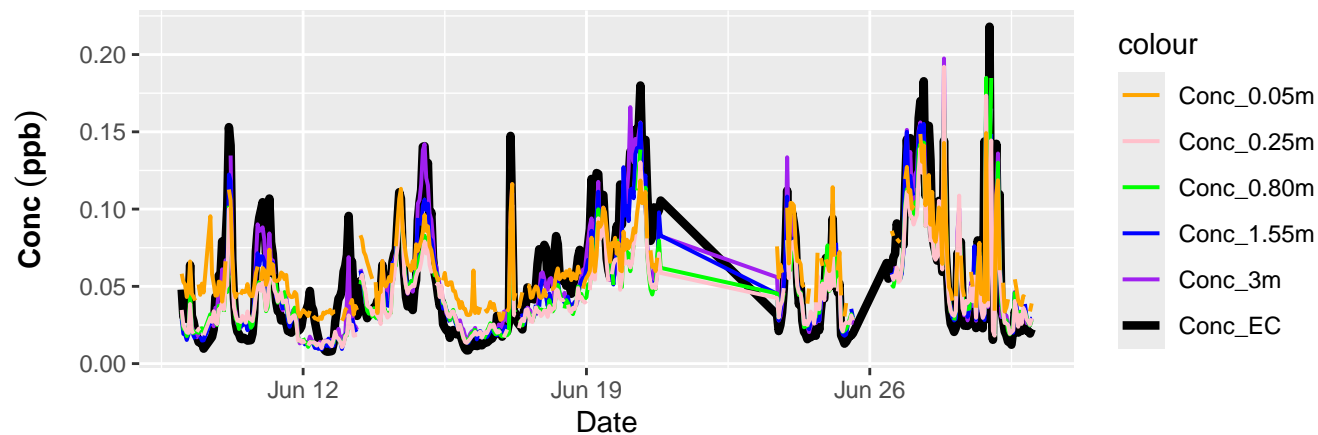

m99.008

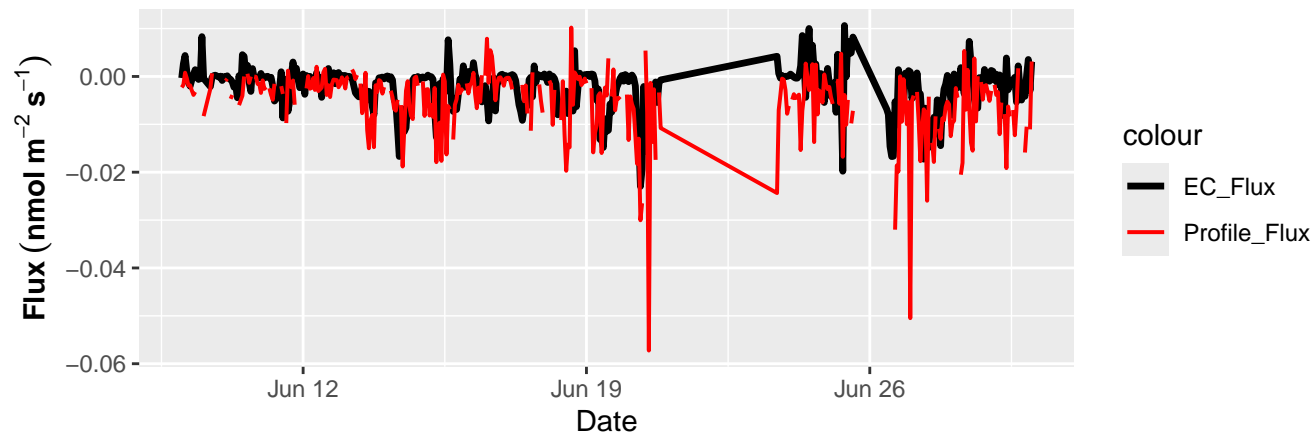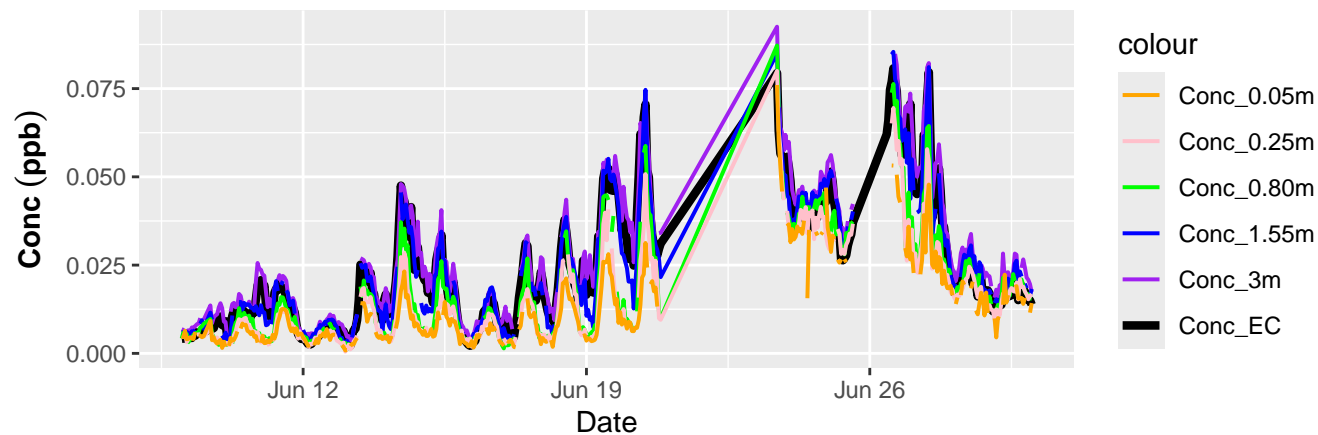

# m101.059

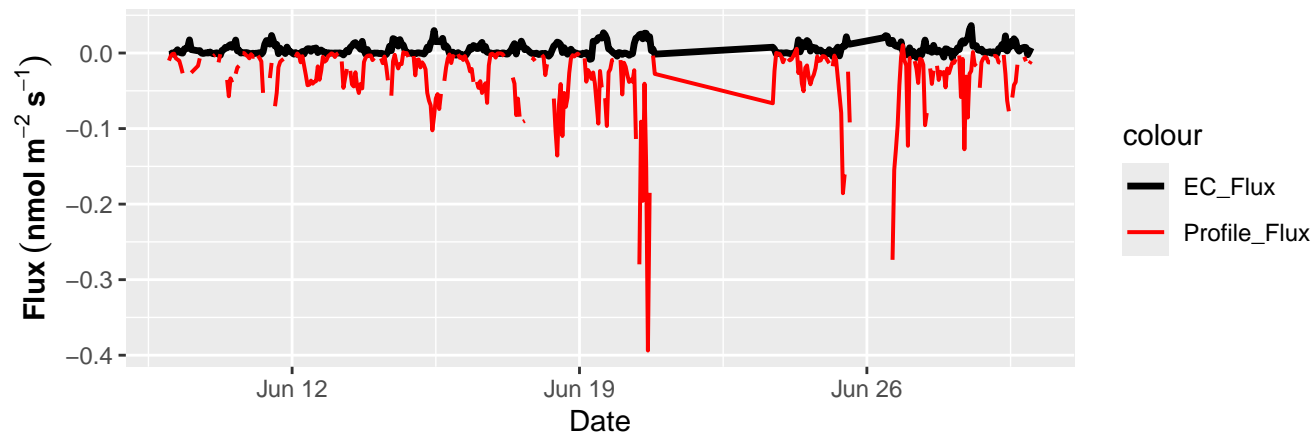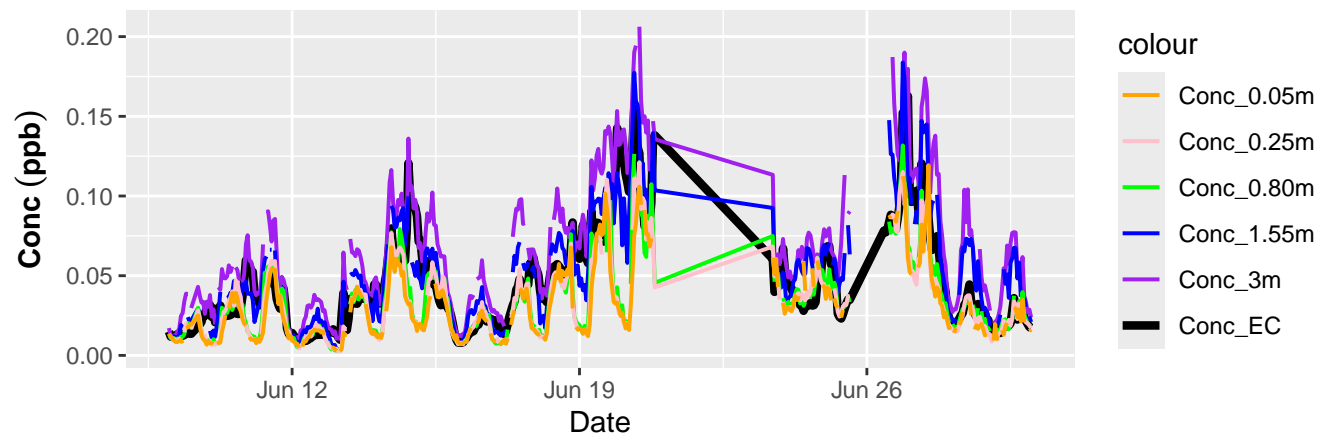

# m103.074

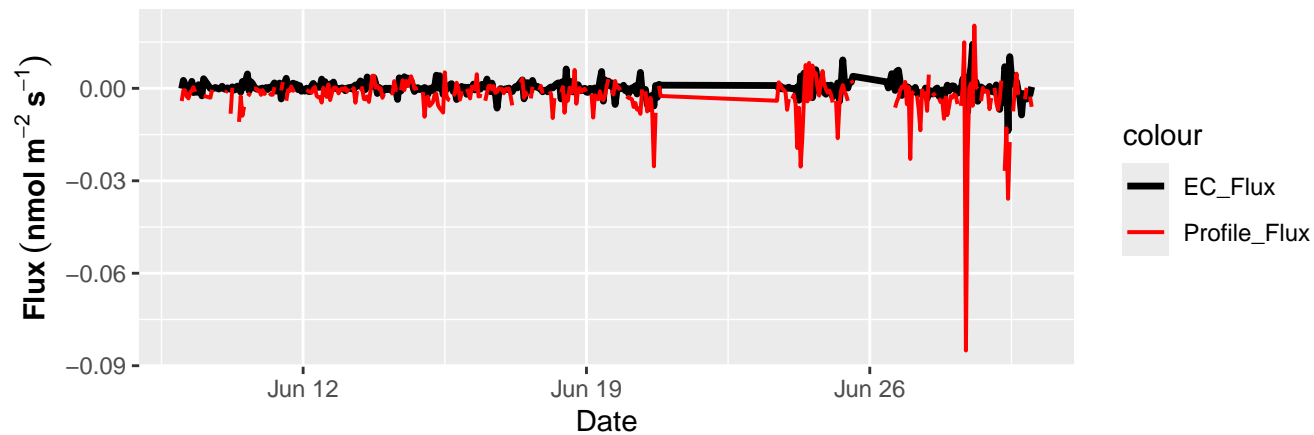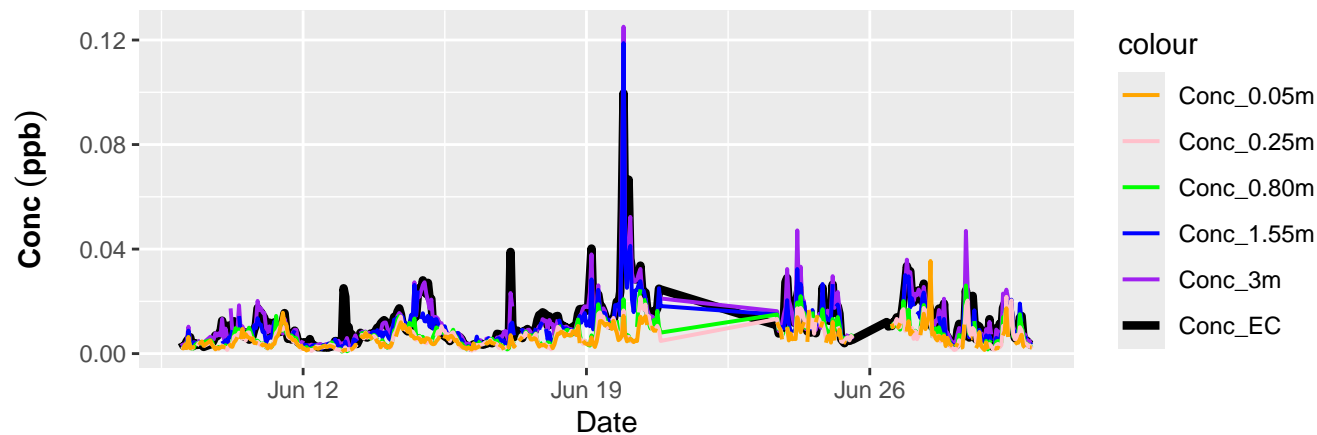

# m105.066

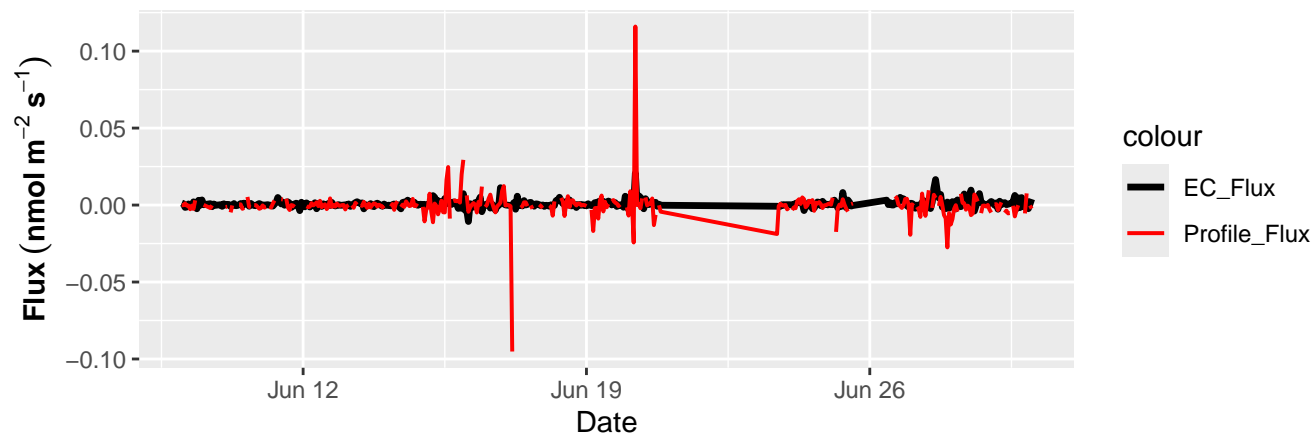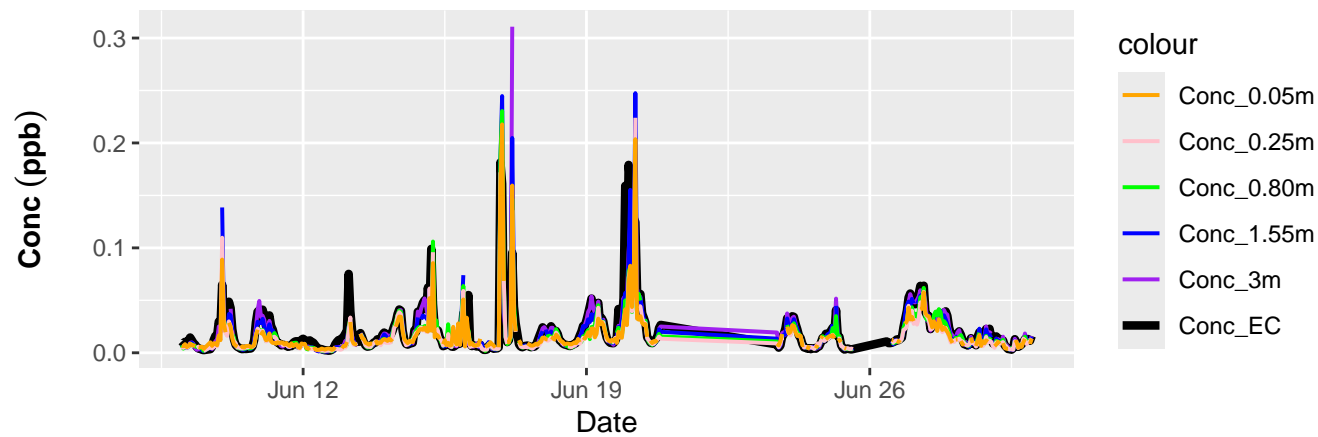

# m109.100

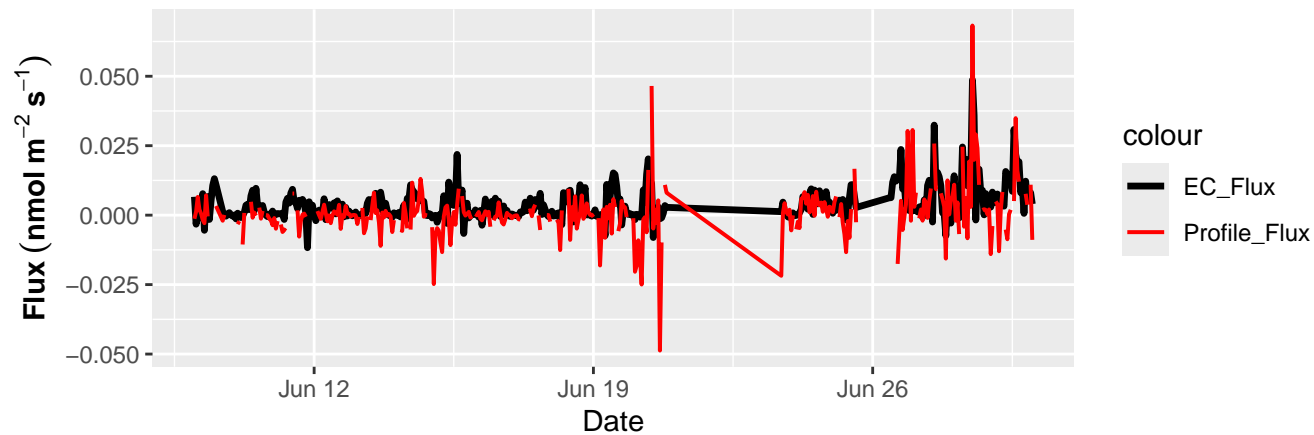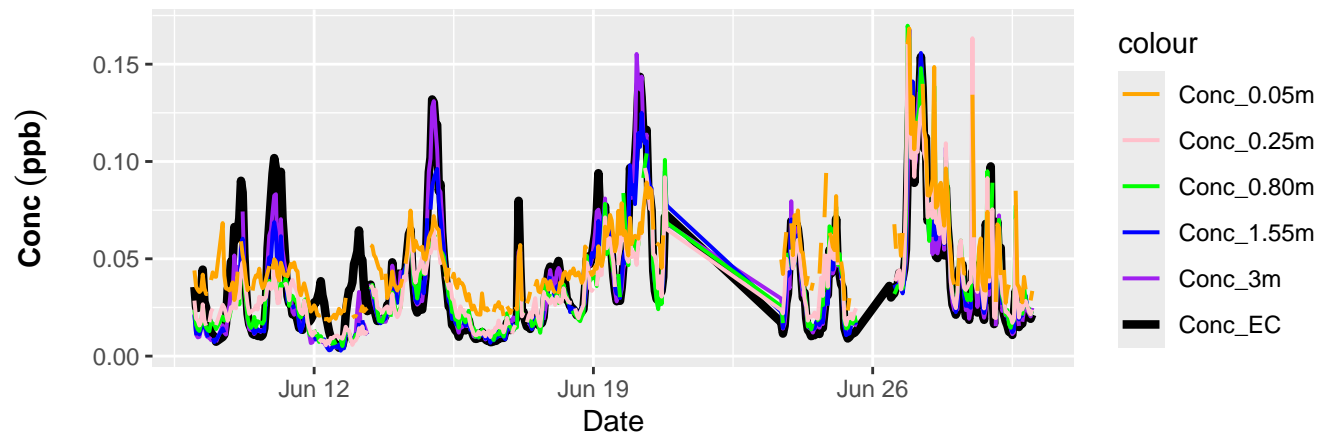



m115.078

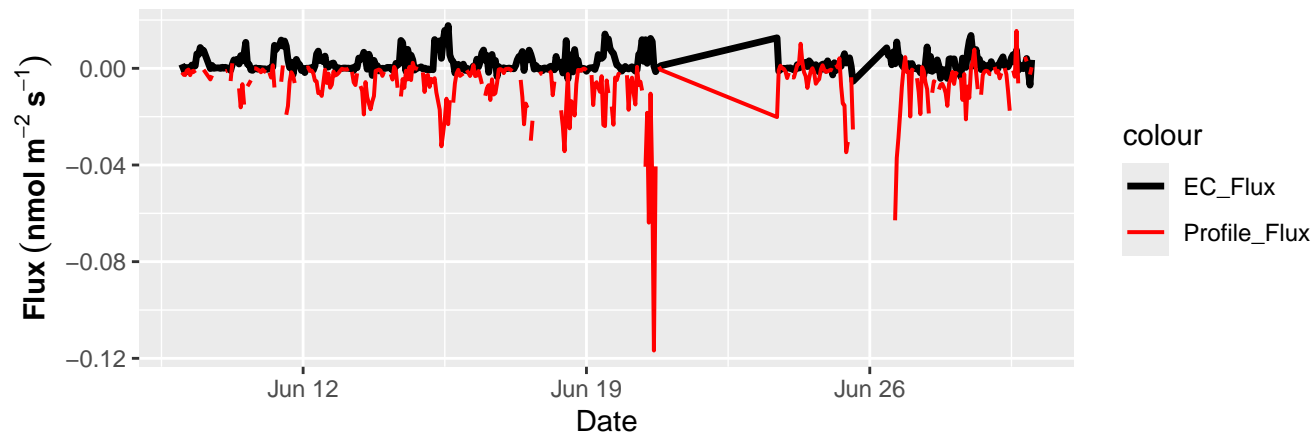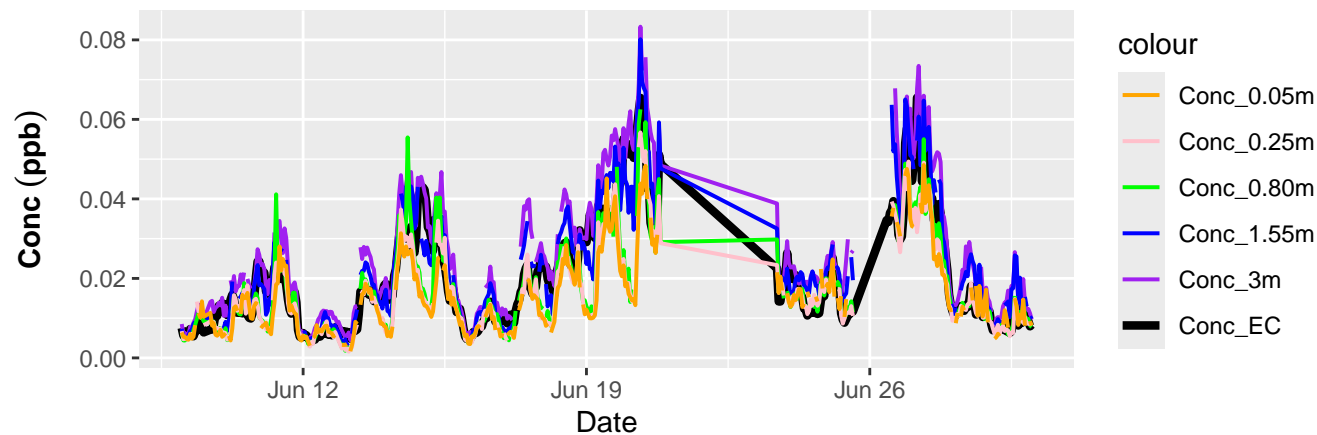

# m118.074

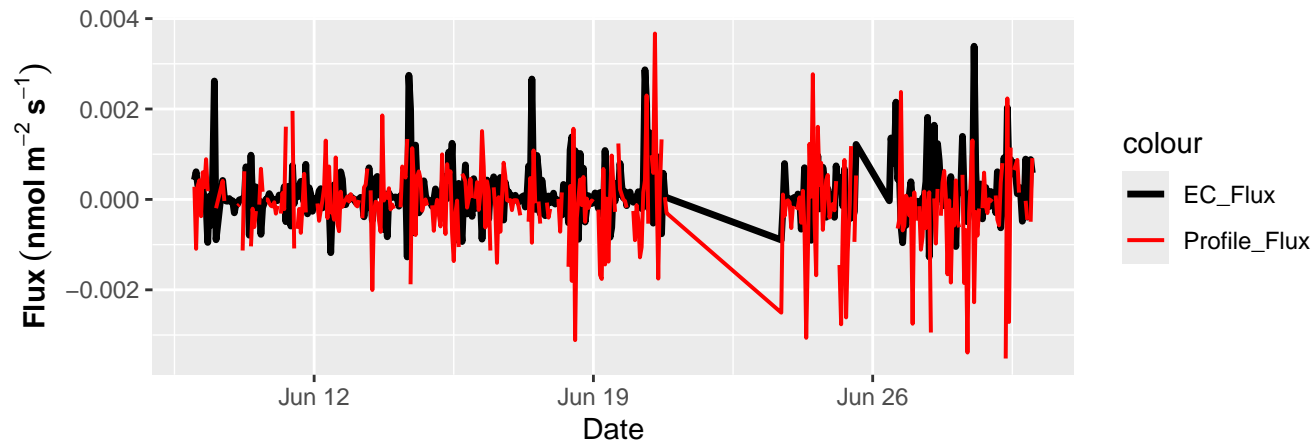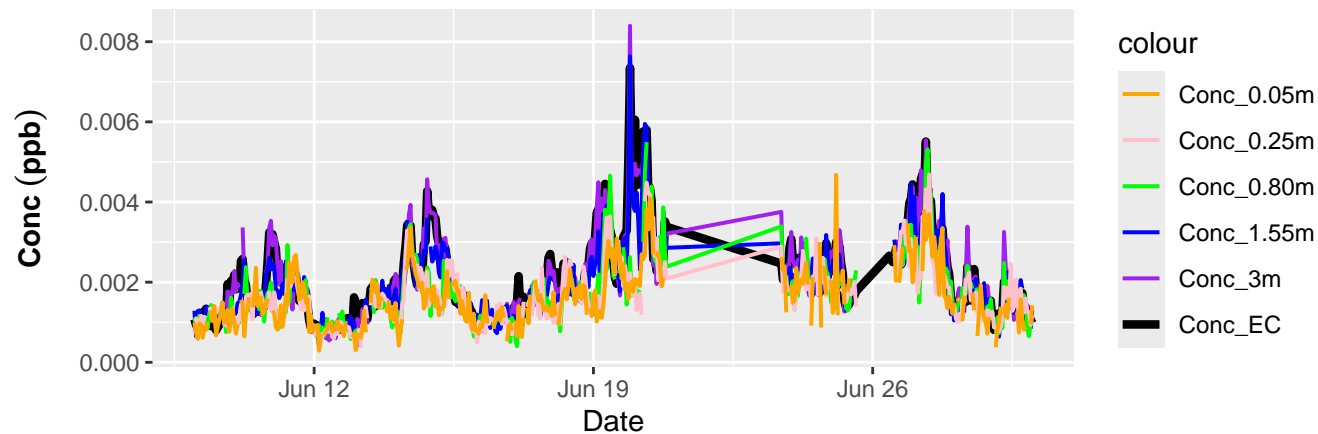

# m121.098

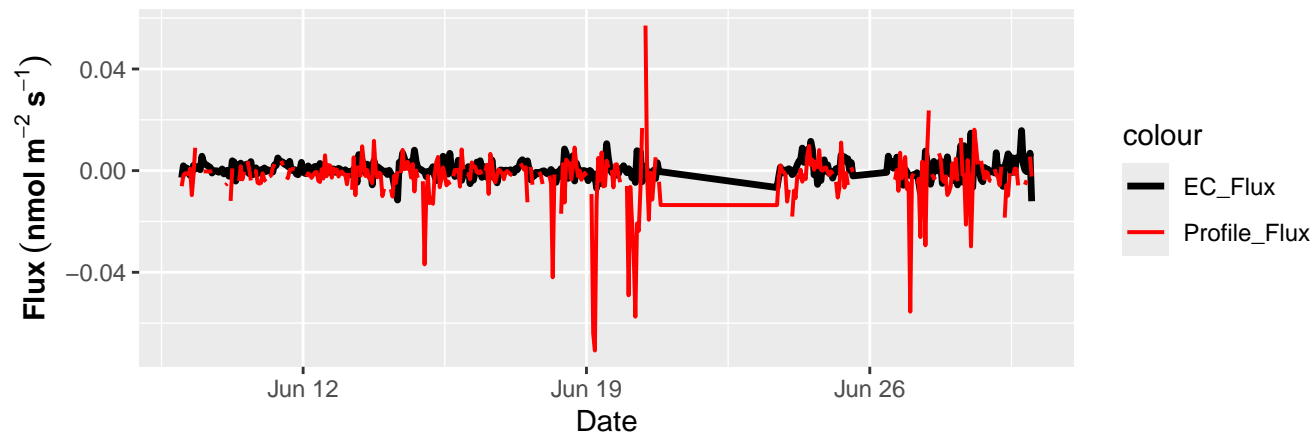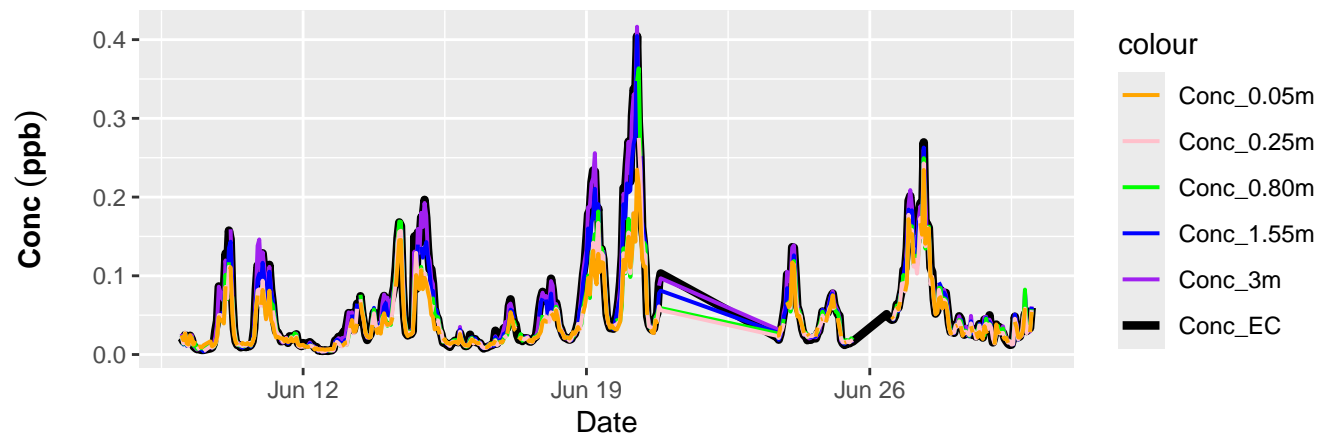

m137.129

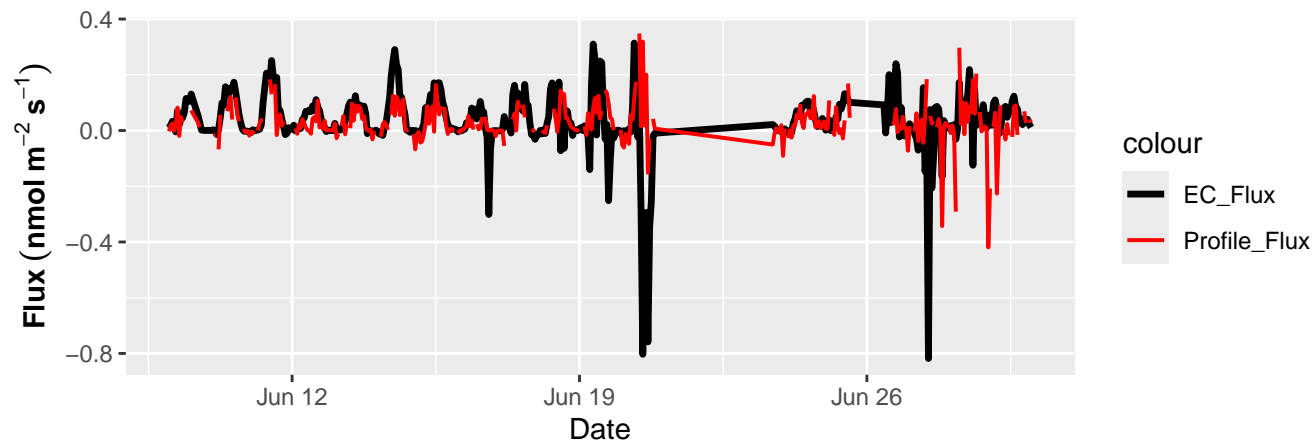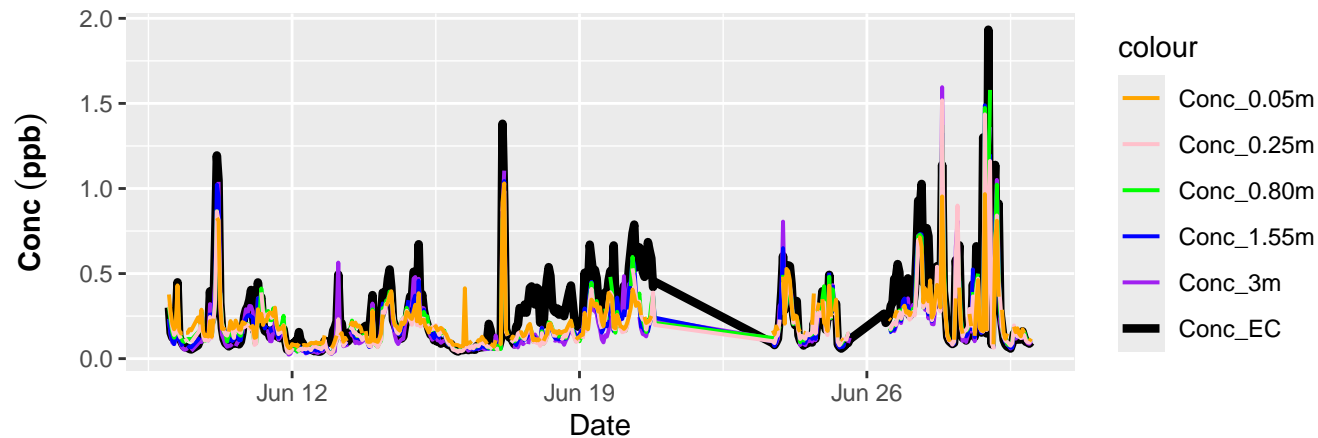

**m167.052**

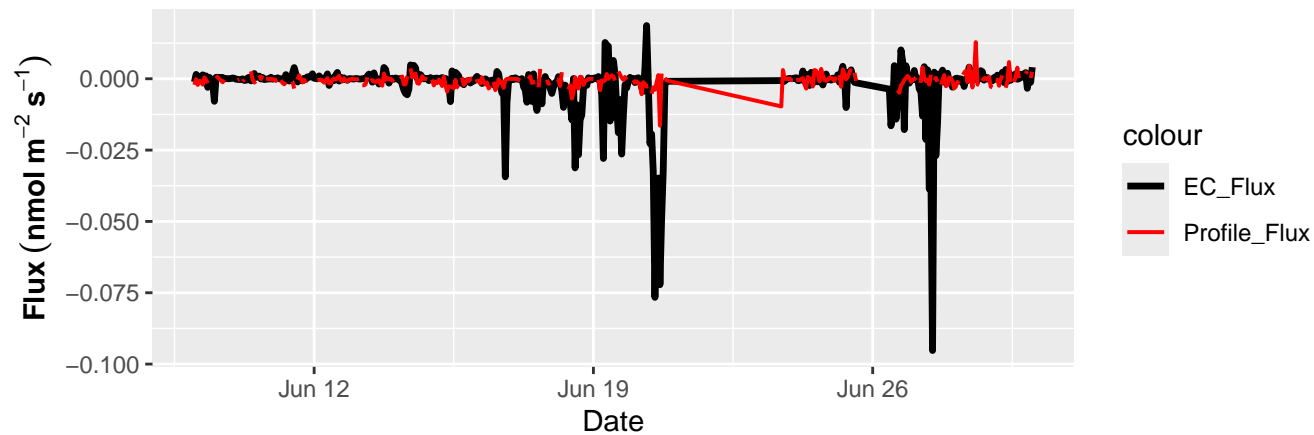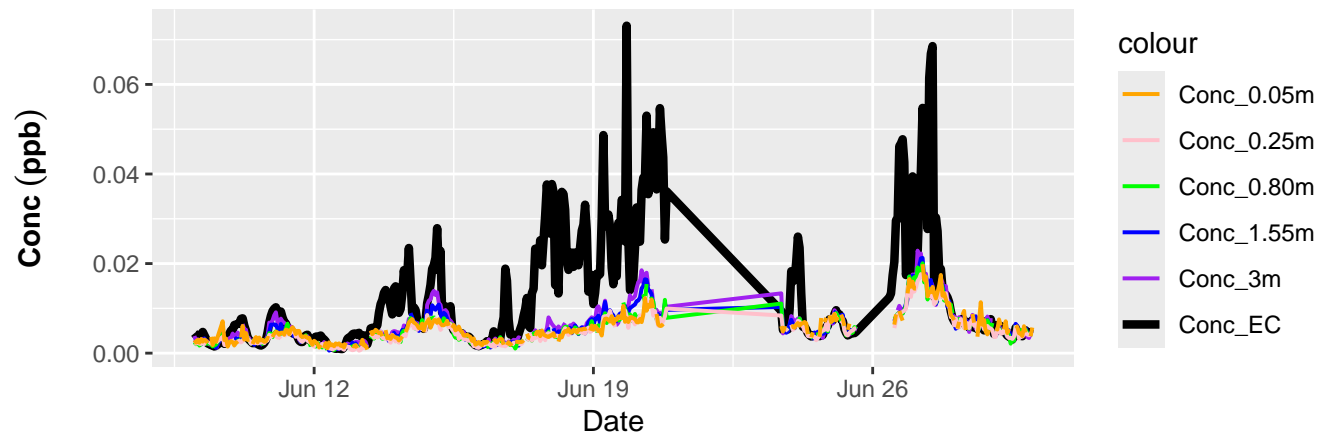

# m205.186

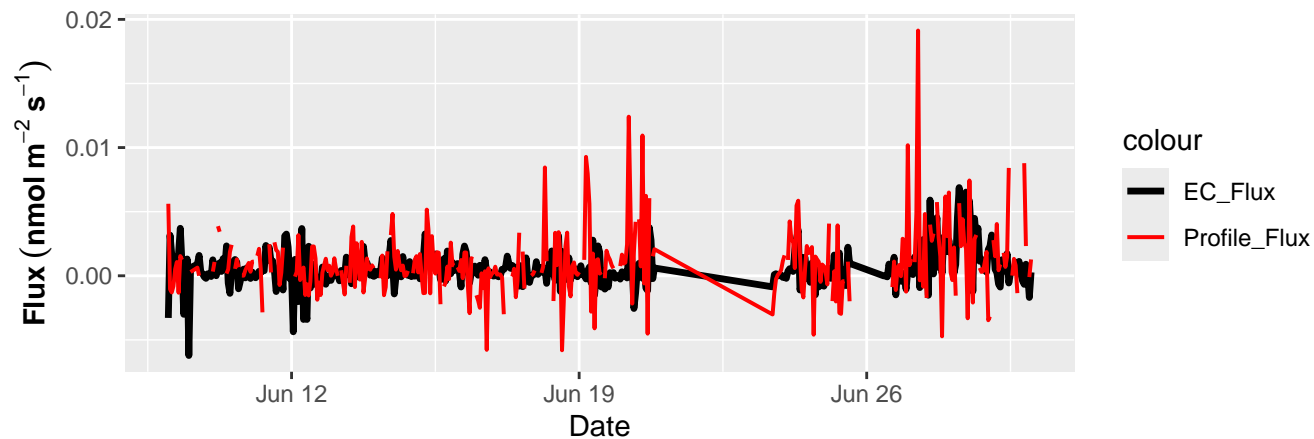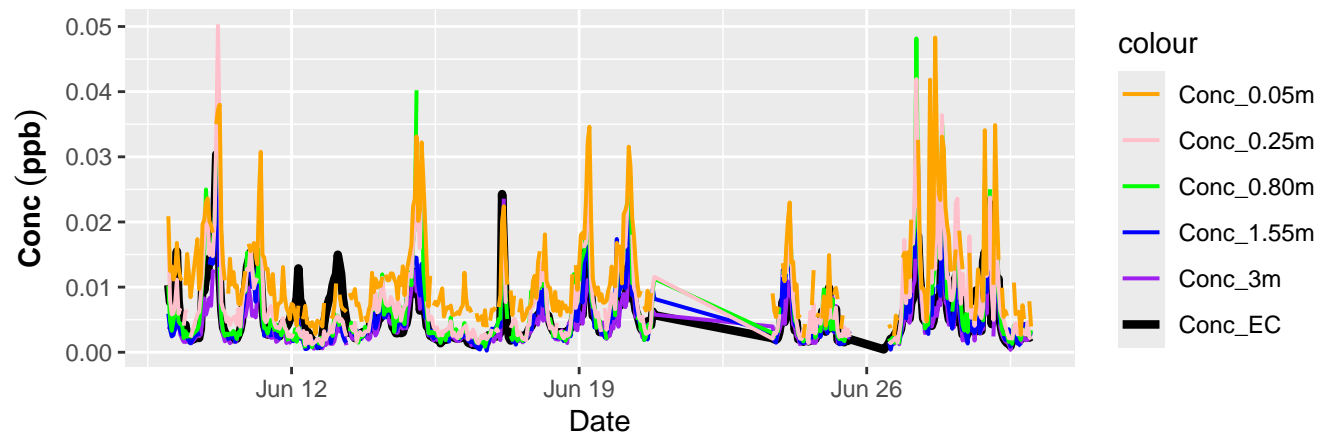

m223.057

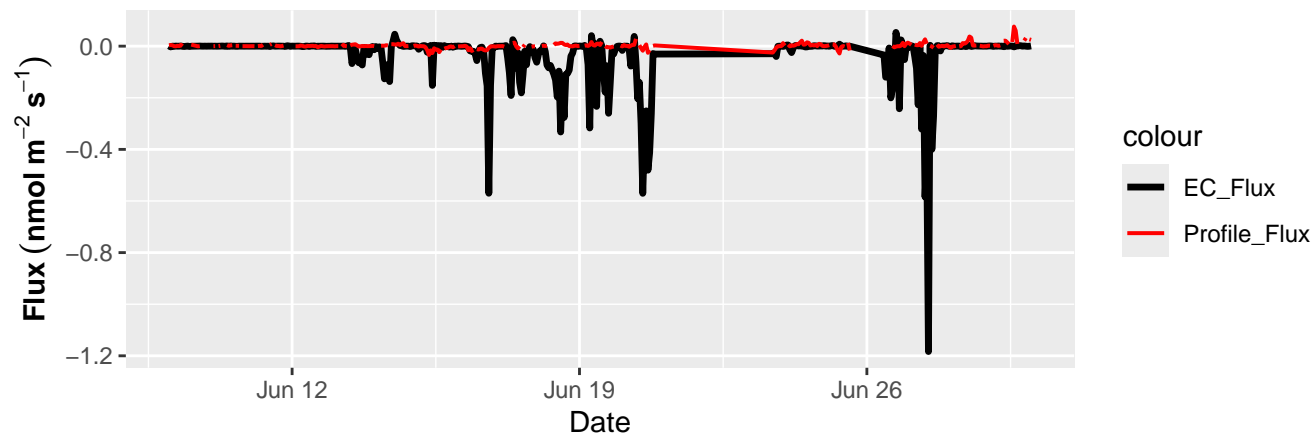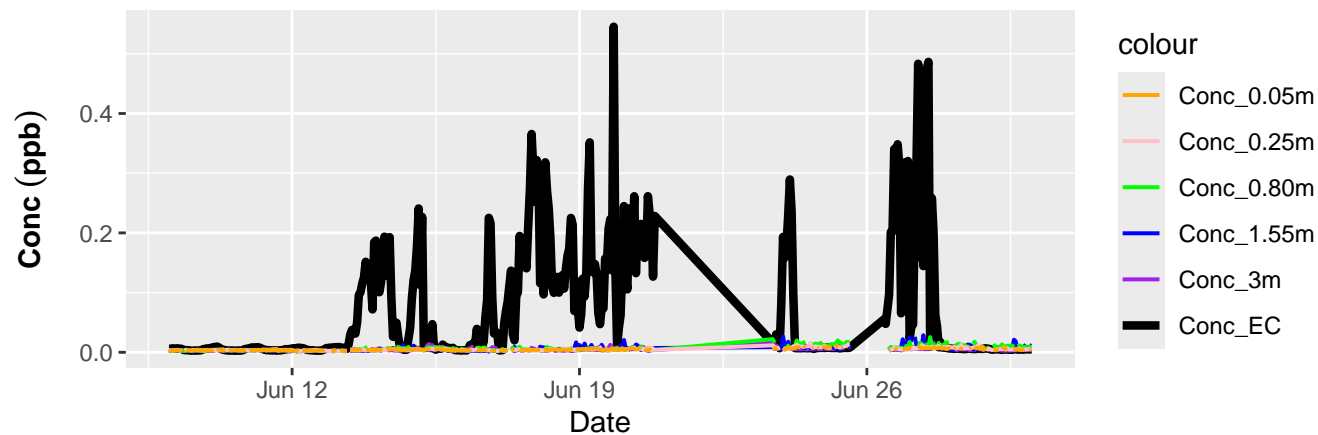

m247.006

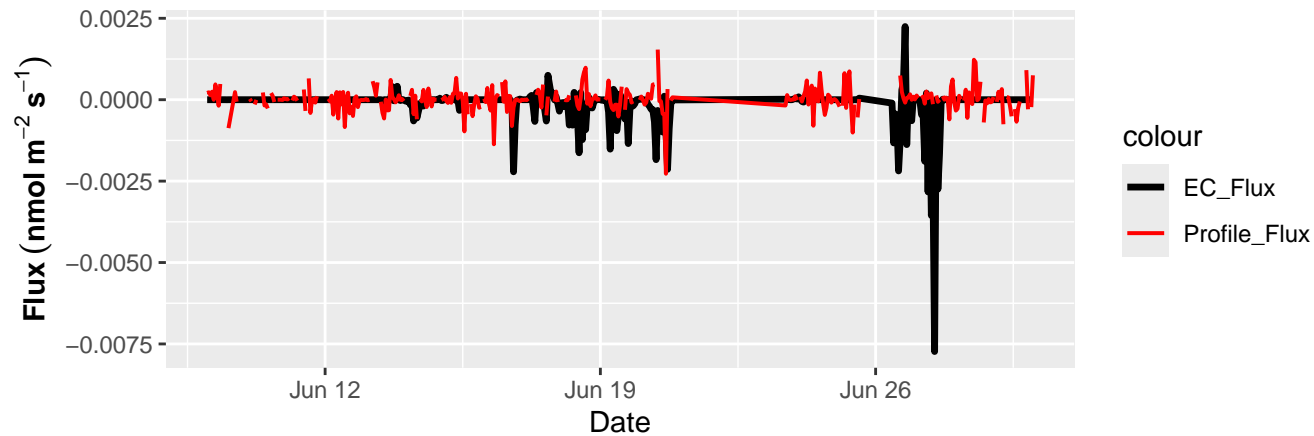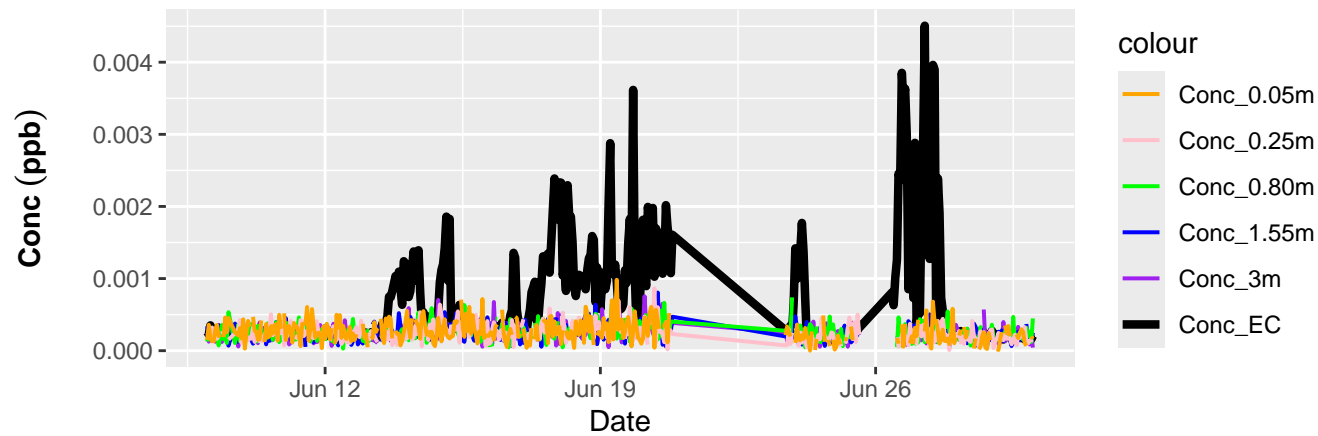



**m297.071**

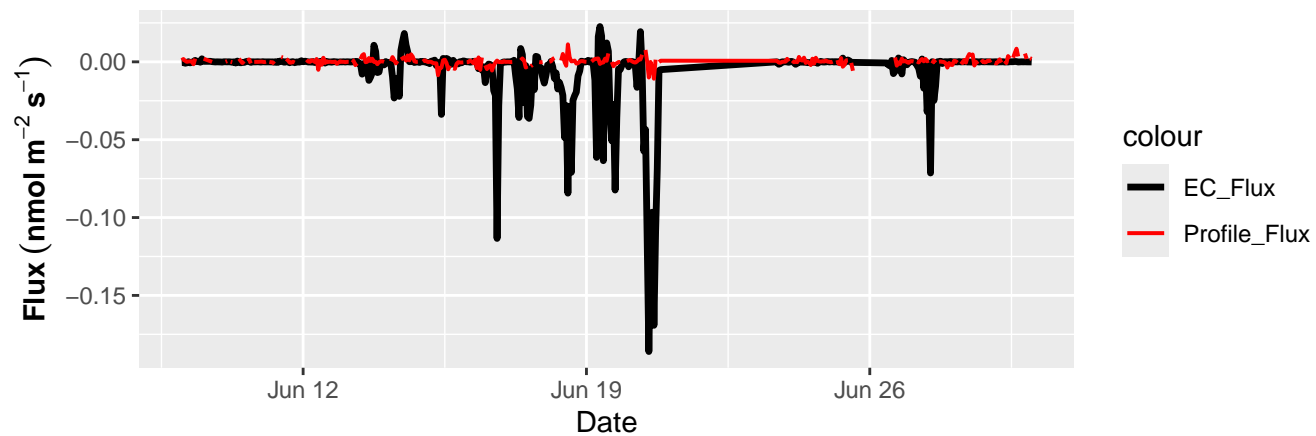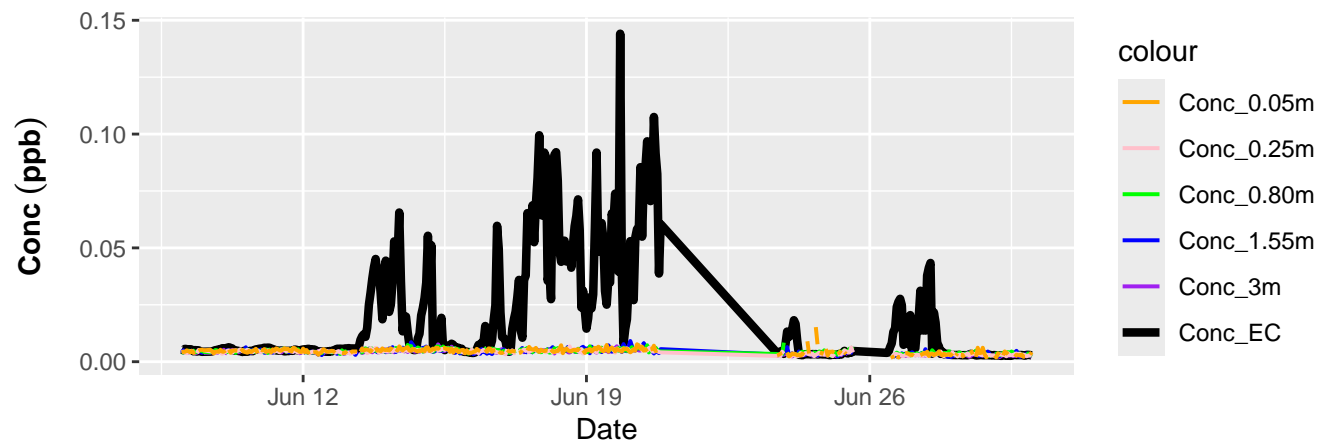

m355.051

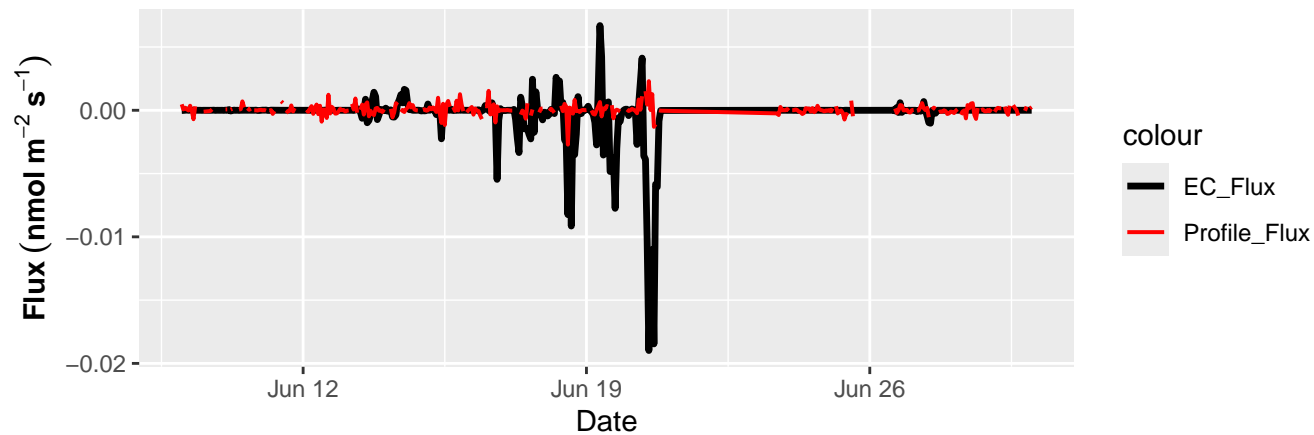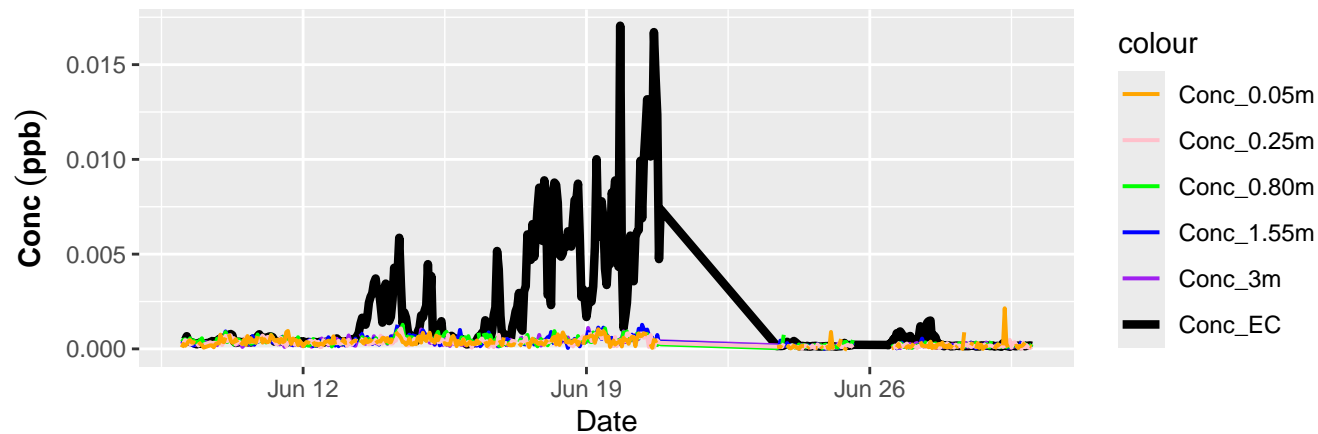

Supplement: Supplementary file 5 [file Fig. S05d - Comparison between EC and profile fluxes - 9 to 30 June.pdf › Supplementary Material/Fig. S05d - Comparison between EC and profile fluxes - 9 to 30 June.pdf]

Fig. S07b – Wind speed and wind direction measured at the FR-Gri site from 9 to 30 June, 2017.

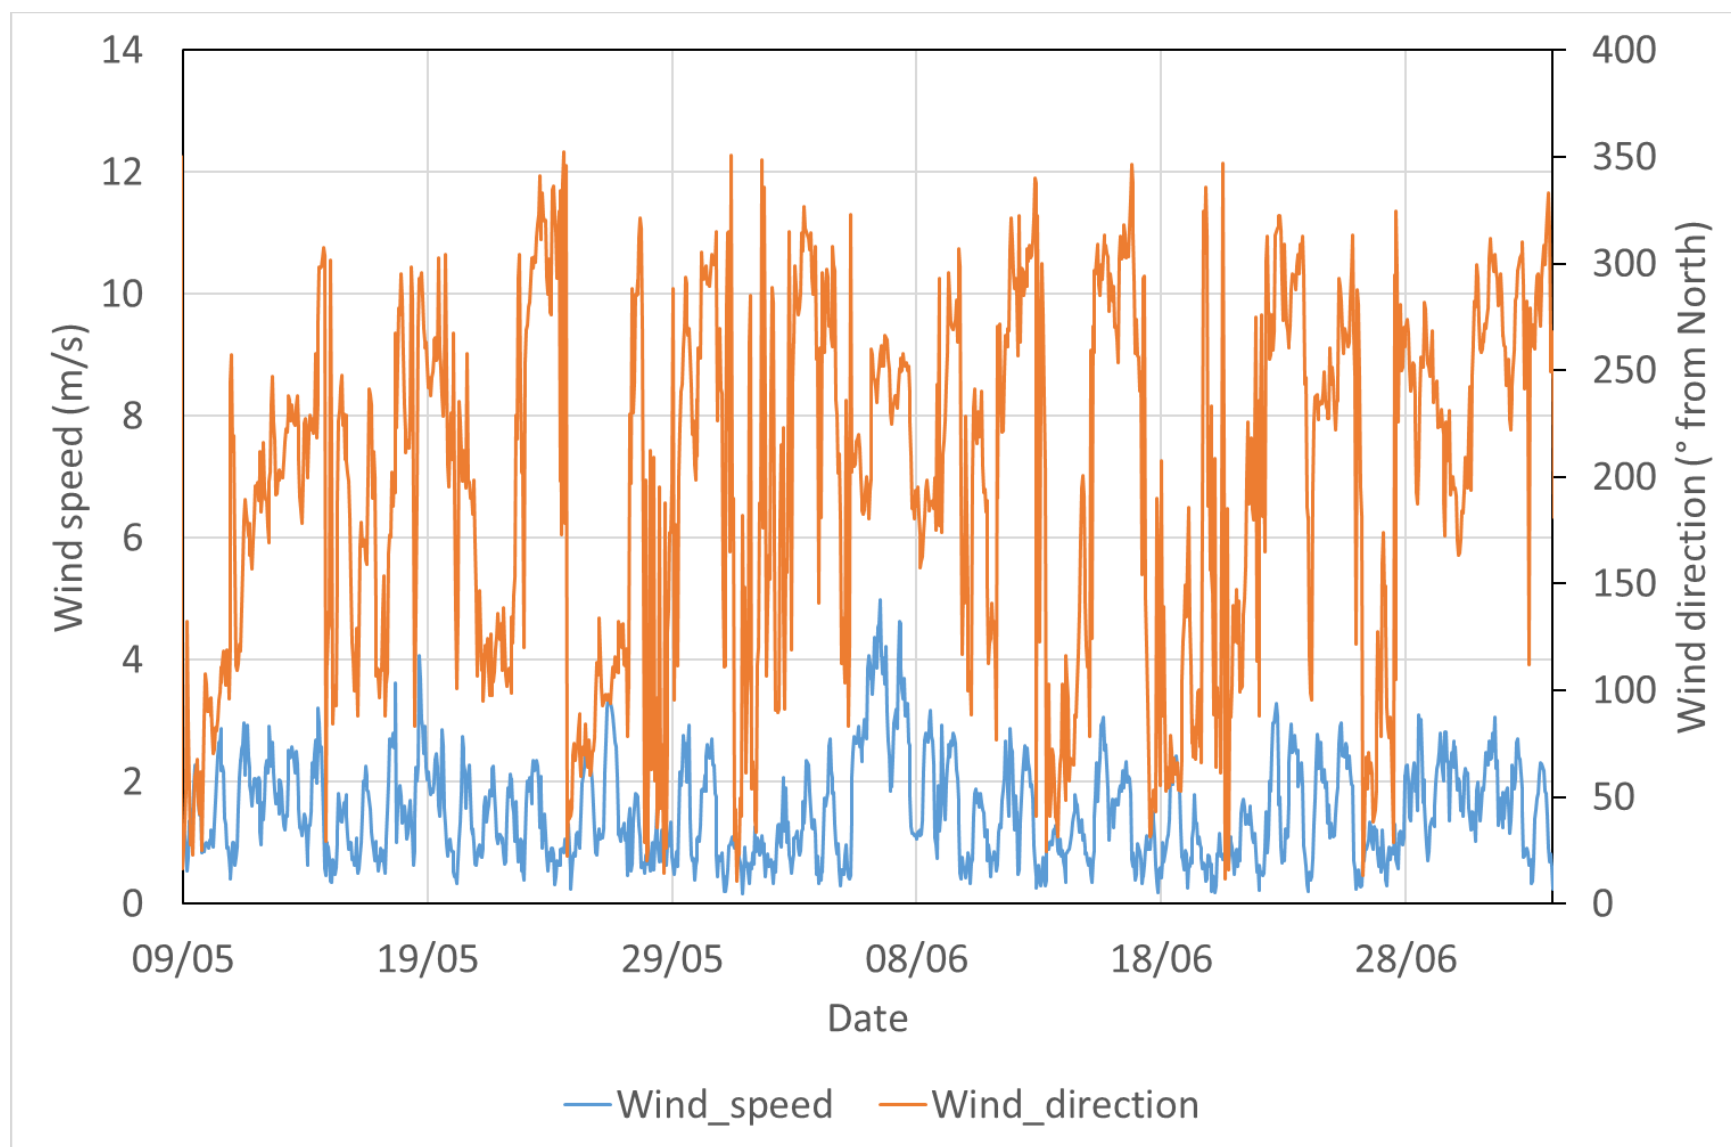

Supplement: Supplementary file 6 [file Fig. S07.pdf › Supplementary Material/Fig. S07.pdf]

m31.018\_2017-05-09 /// 2017-06-30

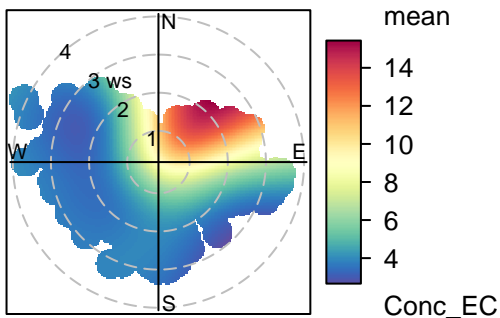

m33.033\_2017-05-09 /// 2017-06-30

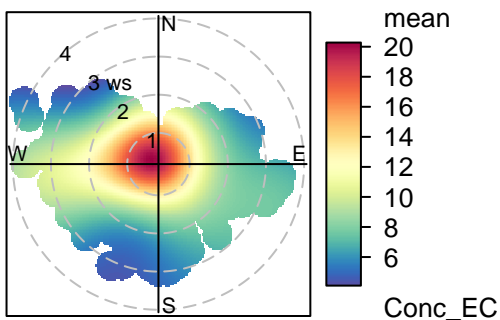

m41.038\_2017-05-09 /// 2017-06-30

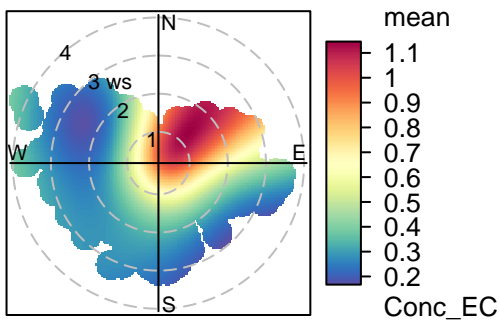

m43.018\_2017-05-09 /// 2017-06-30

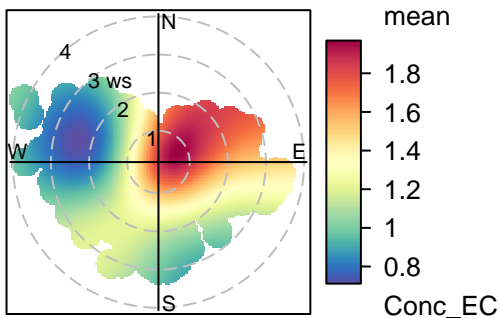

m45.033\_2017-05-09 /// 2017-06-30

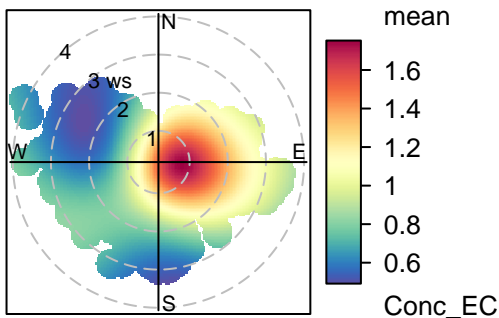

m47.013\_2017-05-09 /// 2017-06-30

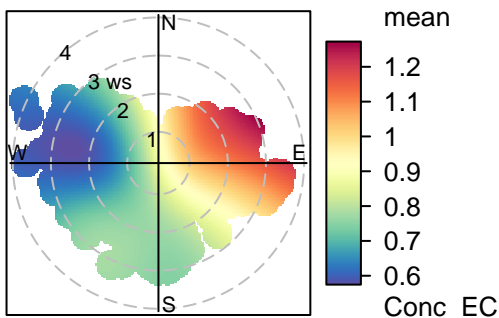

m49.014\_2017-05-09 /// 2017-06-30

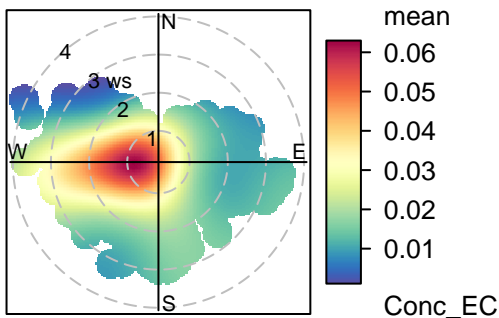

m51.022\_2017-05-09 /// 2017-06-30

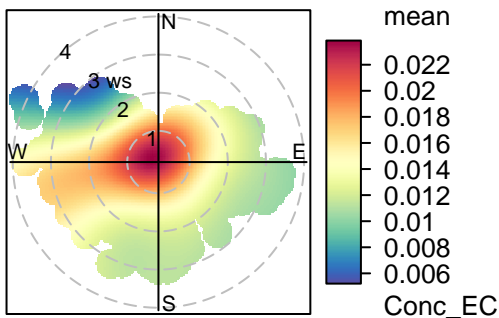

m57.069\_2017-05-09 /// 2017-06-30

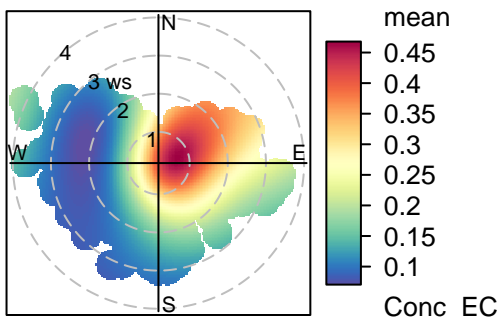

m59.049\_2017-05-09 /// 2017-06-30

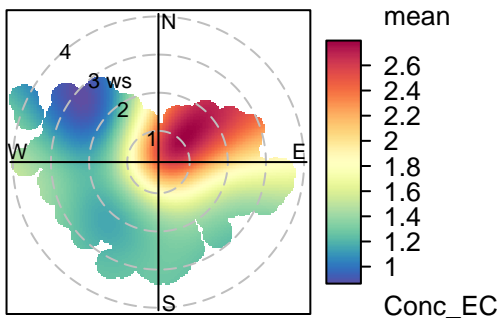

m60.048\_2017-05-09 /// 2017-06-30

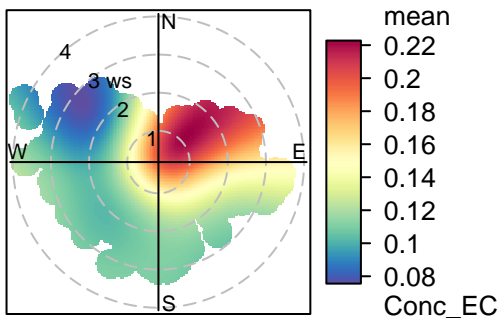

m61.029\_2017-05-09 /// 2017-06-30

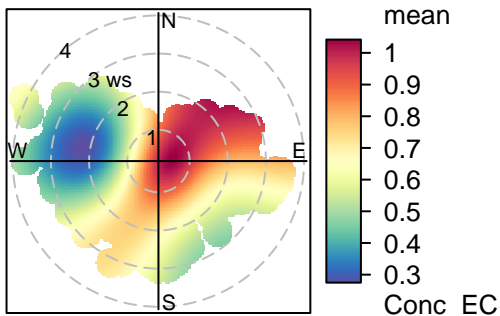

m62.029\_2017-05-09 /// 2017-06-30

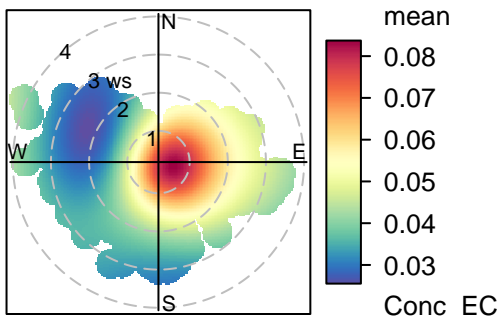

m63.006\_2017-05-09 /// 2017-06-30

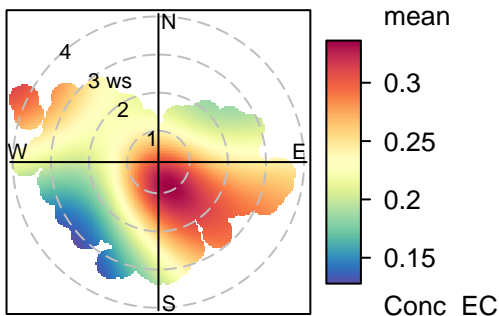

m67.053\_2017-05-09 /// 2017-06-30

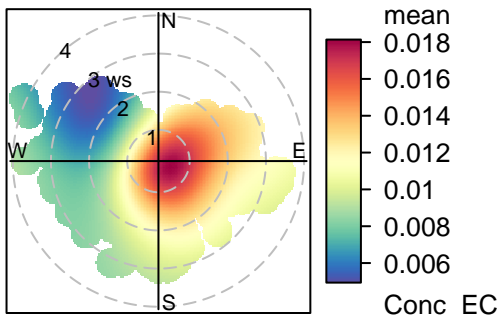

m69.070\_2017-05-09 /// 2017-06-30

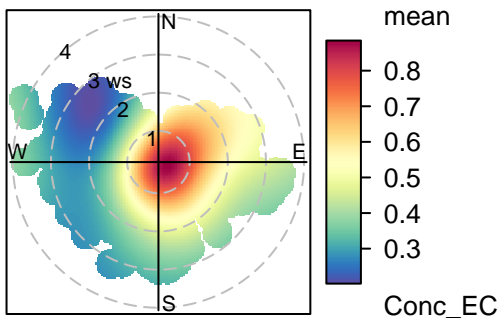

m73.064\_2017-05-09 /// 2017-06-30

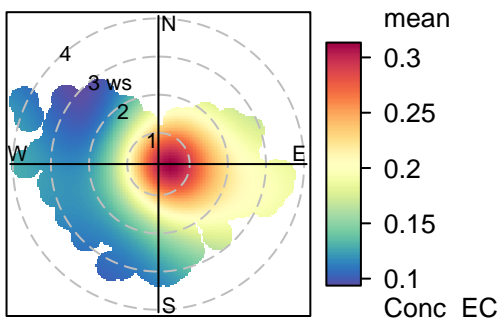

m75.025\_2017-05-09 /// 2017-06-30

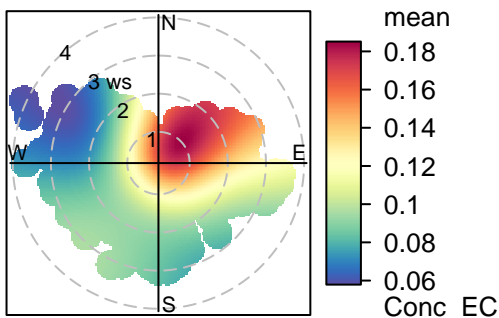

m77.005\_2017-05-09 /// 2017-06-30

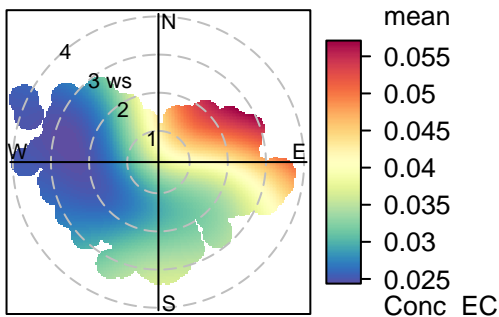

m82.074\_2017-05-09 /// 2017-06-30

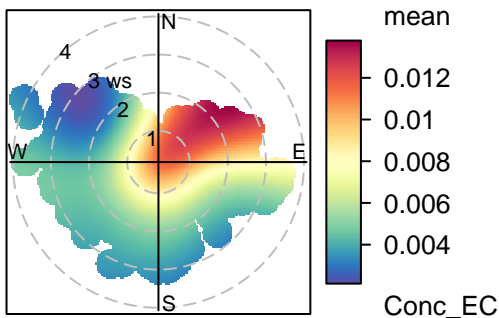

m83.049\_2017-05-09 /// 2017-06-30

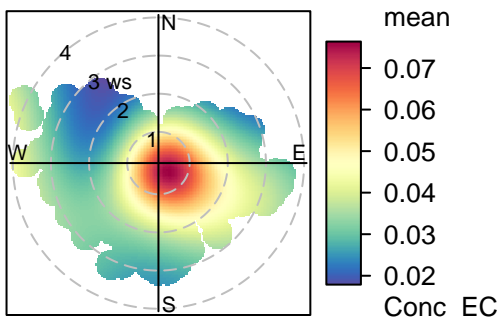

m83.084\_2017-05-09 /// 2017-06-30

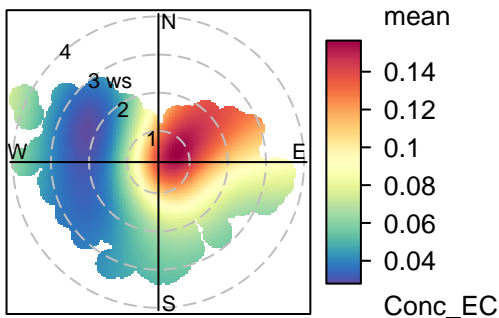

m87.042\_2017-05-09 /// 2017-06-30

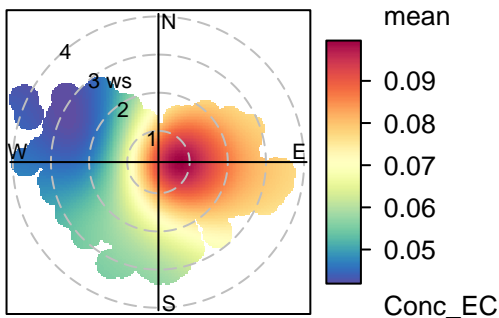

m87.078\_2017-05-09 /// 2017-06-30

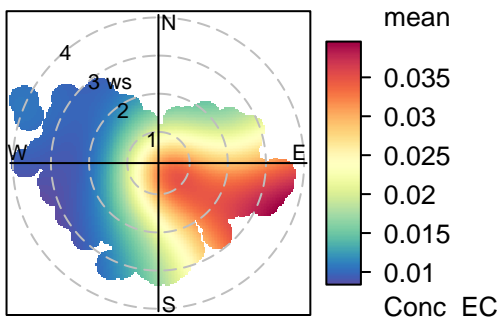



m93.035\_2017-05-09 /// 2017-06-30

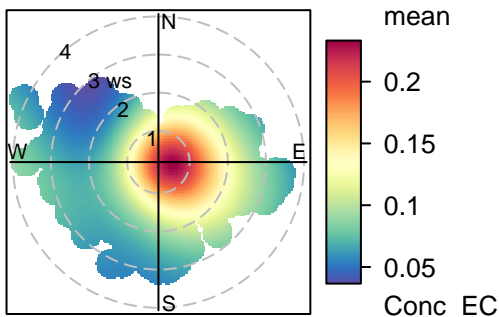

m95.015\_2017-05-09 /// 2017-06-30

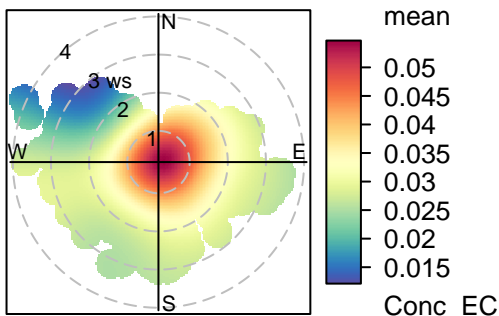

m95.083\_2017-05-09 /// 2017-06-30

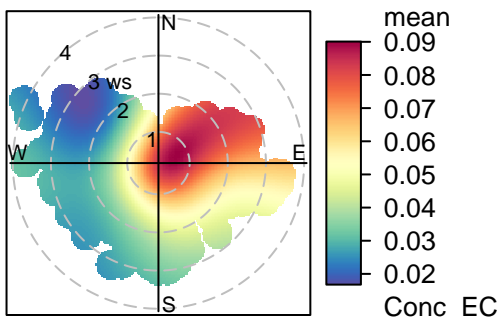

m99.008\_2017-05-09 /// 2017-06-30

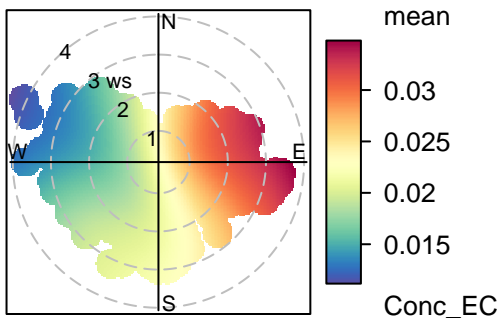

m101.059\_2017-05-09 /// 2017-06-30

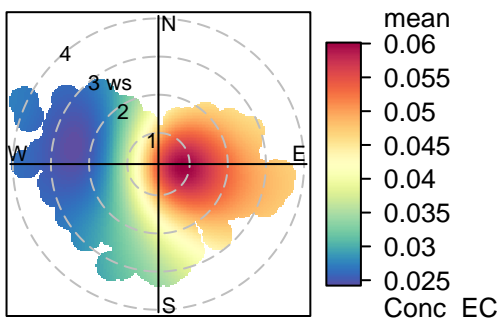

m103.074\_2017-05-09 /// 2017-06-30

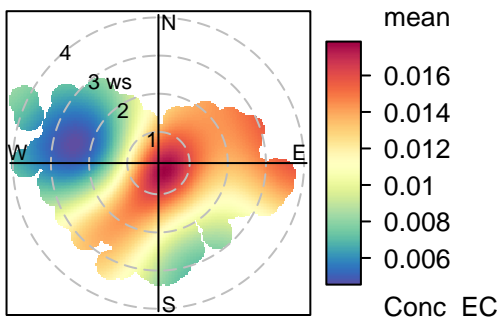

m105.066\_2017-05-09 /// 2017-06-30

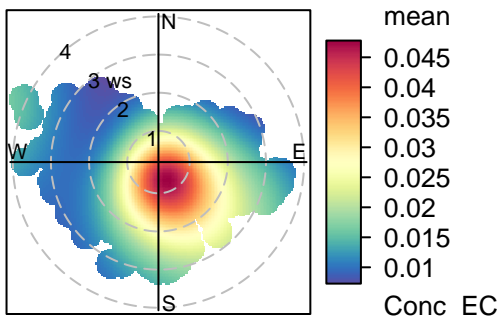

m109.100\_2017-05-09 /// 2017-06-30

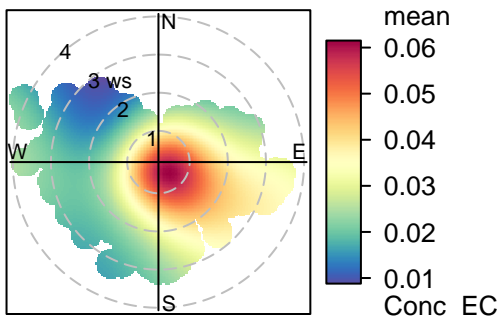

m115.078\_2017-05-09 /// 2017-06-30

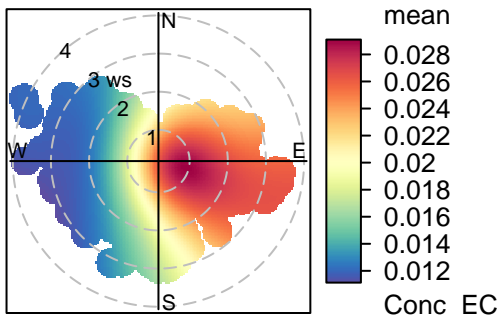

m118.074\_2017-05-09 /// 2017-06-30

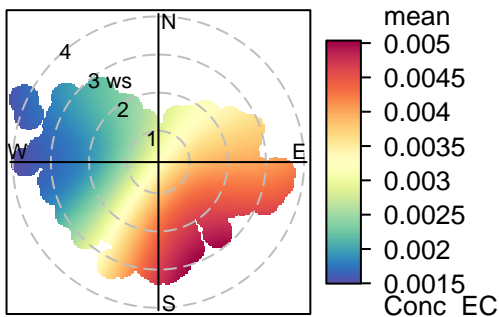

m121.098\_2017-05-09 /// 2017-06-30

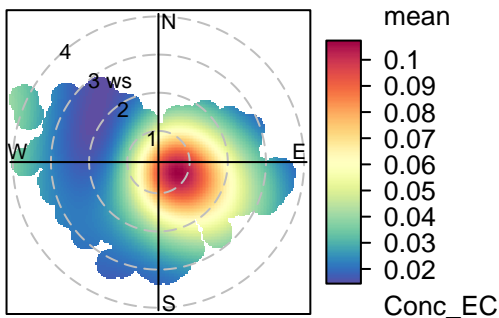

m137.129\_2017-05-09 /// 2017-06-30

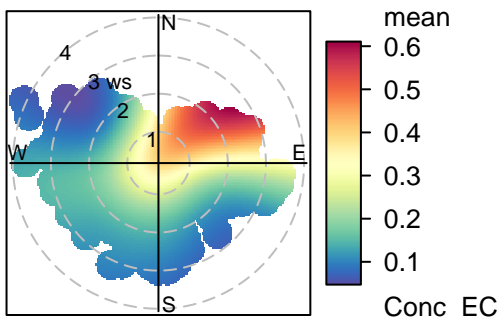

m167.052\_2017-05-09 /// 2017-06-30

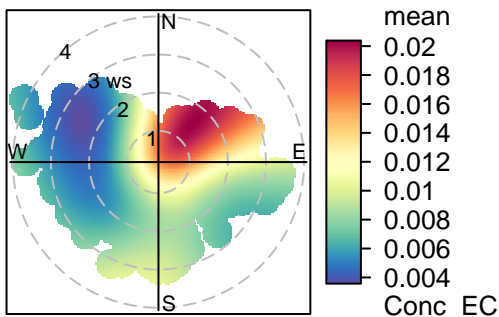

m205.186\_2017-05-09 /// 2017-06-30

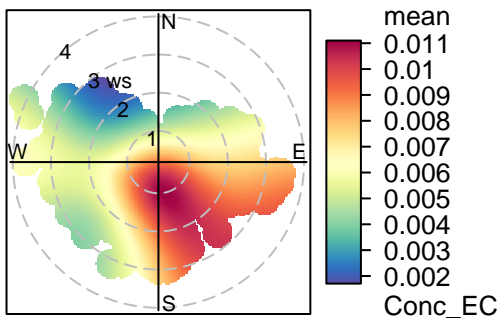

m223.057\_2017-05-09 /// 2017-06-30

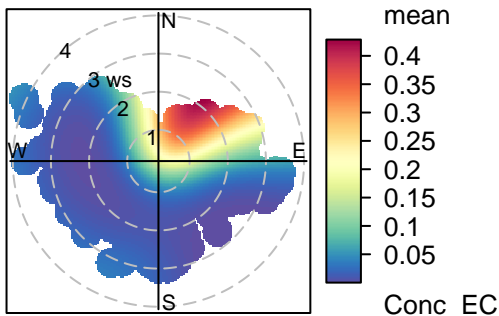

m247.006\_2017-05-09 /// 2017-06-30

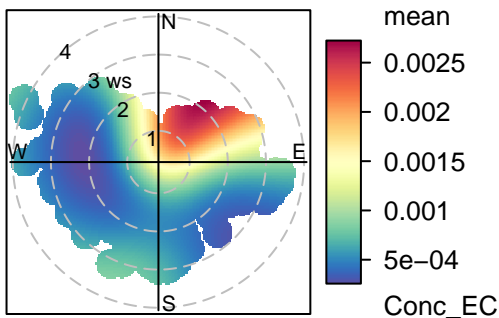

m297.071\_2017-05-09 /// 2017-06-30

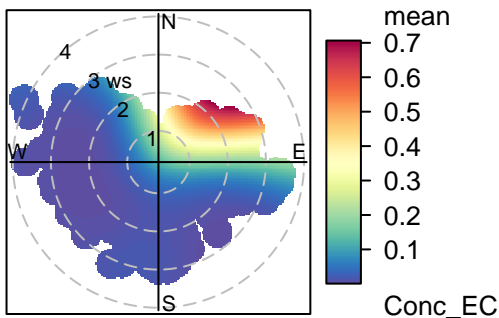

m355.051\_2017-05-09 /// 2017-06-30

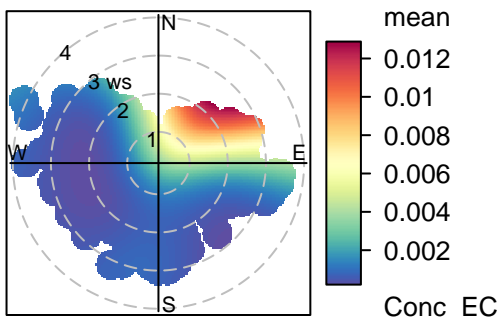

Supplement: Supplementary file 7 [file Fig. S08.pdf › Supplementary Material/Fig. S08.pdf]
